# Supplementary material
Source: Research Square preprint supplement (doi:10.21203/rs.3.rs-9967549/v1)
Supplement: Supplementary file 2 [file 09634e4b258767cd02256295.xlsx]

## Sheet: Readme
Article Title: Paenibacillus spp., a novel potato endophyte, adapts its physiology in planta to establish mutualistic symbiosis with potato
Authors: Karmen Pogačar, Tim Godec, Juliane Albrecht, Polonca Štefanič, Maja Križnik, Barbara Kraigher, Tjaša Lukan, Valentina Levak, Katja Stare, Marko Petek, Sarah Lebeis, Peter Dolničar, Ines Mandić Mulec, Kristina Gruden
Corresponding Author: Karmen Pogačar, Tim Godec
Date Created: December 2024
Last Updated: May 2026
Version: v1.0 for Supplement table
Objective: Supporting informationn for the manuscript
Content: Sheet 2: S1_Primers_PCR&Plasmid; Sheet 3: S2_qPCR_Primers; Sheet 4: S3_GeneClusters; Sheet 5: S4_qPCR_PlantResponse; Sheet 6: S5_qPCR_PlantResponsesStat; Sheet 7: S6_RNAseq_DEA
Legend
F: Forward
R:Reverse
not aplicable: /; -

## Sheet: S1_Primers_PCR&Plasmid
Table S1: Primers used for gene amplification. Primer sequences are listed in the 5′–3′ direction.
Primer Name	Primer sequence
Bakt_341F	5' CCTACGGGNGGCWGCAG 3'
Bakt_805R	5' GACTACHVGGGTATCTAATCC 3'
Pkm8_R	5' gccattcaaaaaactgcatcatcgtatgatttctcttcaTTGATTTTTTGAAGACTTACTTCGGAGTCAAAAATCCCTCT 3'
Pkm8_F	ctctcccgaatcagggtgaggaatcttccgctaaataaGGGACTTACCGAAAGAAACCATCAATGATGGTTTCTTTTTTG
GFP_F	5' catatcaatcacgaatttatcaagtatttgatcctctagGGATCCgtatttgatcctctagatttaagaaggagatatac 3'
GFP_R	5' ctttagttgaagaataaagaccacattaaaaaatgtggGCTAGCaagcttgcatgcctgcaggagatttatttgtatagttca 3'
Cm_F	5' tgaactatacaaataaatctcctgcaggcatgcaagcttGCTAGCccacattttttaatgtggtctttattcttcaactaaag 3'
Cm_R	5' cctgcccgcgtttgcggatcatctcagcagcgaattccCAATTGgtacagtcggcattatctcatattataaaagccagt 3'
amyS_front_F	5' AGAGGGATTTTTGACTCCGAAGTAAGTCTTCAAAAAATCAAtgaagagaaatcatacgatgatgcagttttttgaatggc 3'
amyS_front_R	5' gtatatctccttcttaaatctagaggatcaaatacGGATCCctagaggatcaaatacttgataaattcgtgattgatatg 3'
AmyS_back_F	5' actggcttttataatatgagataatgccgactgtacCAATTGggaattcgctgctgagatgatccgcaaacgcgggcagg 3'
AmyS_back_R	5' CAAAAAAGAAACCATCATTGATGGTTTCTTTCGGTAAGTCCCttatttagcggaagattcctcaccctgattcgggagag 3'

## Sheet: S2_qPCR_Primers
Table S2: Selected genes and corresponding primers and probes sequences for expression analyses with quantitative PCR. Gene functional group, name (abbreviation) and description, as well as corresponding primer and probe sequences, source and amplication efficiency are shown. n.a.: not available. Suitability of reference genes was validated using RefFinder (https://www.heartcure.com.au/reffinder/…
Functional group	Gene name	Source	Target gene ID	Description	Forward primer sequence 5'→3'	Reverse primer sequence 5'→3'	Probe sequence 5'→3'	Source	Efficiency (%)
ROS signaling	StRBOHD1&2	S. tuberosum	Sotub06g025550, Soltu.DM.06G024560 Sotub06g025580, Soltu.DM.06G024580	potato respiratory burst oxidase homologue D (AtRbohD, AtRbohC)	CAAAGAATGGTACAAGAAGACGACAT	CCTGAATGCCCTTAGTAATCTTTCAC	FAM-TGTACTTGGCTATACCAATCATACTTTAT-NFQ	Lukan et al., 2020	93
	StCAT1	S. tuberosum	Sotub12g027890, Soltu.DM.12G004810	catalase 1	ANCAAATGGGTTGAGTCTCTATCC	AGGACTTGTCAGCCTGAGACAAGTAT	FAM-CTCATGAGATTCGCAGCAT-MGB	PompeNovak et al., 2006	93
	StTRXH	S. tuberosum	Sotub04g034250, Soltu.DM.04G035950	Thioredoxin H	CAAGGTTGAGGAGTGGGATGTG	AGTAAAATCCACCACCACCAGTTT	FAM-CTCCACGCCCTTCTGG-MGB	Lukan et al., 2020	97
Cell wall biosynthesis	StCALS	S. tuberosum	Sotub07g019600, Soltu.DM.07G019860	Glucan synthase like 1	GAACACGAACTGGAGGATATTTTACC	GATTCCACGACCCACAAACG	FAM-TTGTCCTGGTGGTTCCAGAGTCGG-NFQ	Lukan et al., 2022	90
Auxin signaling	StARF2	S. tuberosum	Sotub03g031730, Soltu.DM.03G032540	Auxin response factor 2	CCAGTCATAGCATGCATCTTGGT	TGGTTTGTAATACACAGTGAACATCGT	FAM-CCAAGCTGTTGCAAGTAC-MGB	Baebler et al., 2014	87
Immune complex	StHSP70	S. tuberosum	Sotub09g009340, Soltu.DM.09G002330	heat shock protein 70	CCCTAGGGCACTTAGAAGGTTGA	GTGGTCTGAGCAGTGGATGAAA	n.a.	Lukan et al., 2020	93
Ethylene signaling	StPTI5	S. tuberosum	Sotub02g020180, Soltu.DM.02G016660	ERF transcription factor PTI5	GCAAGAAATACAGAGGCGTACGA	CATACTCTCGCACCGTGTCTAG	FAM-TTCGGCAGCGTATTTT-NFQ	Coll et al., 2024	93
	StERF1	S. tuberosum	Sotub12g018730, Soltu.DM.03G014550	ethylene responsive factor 1	TCGGTTTAAATGAGCCGGAG	GAAGCTGATGATACCGACGAACTAG	FAM-CCGGTTAGAGTGACGGTTAA-MGB	Petek et al., 2014	87
Ethylene biosythesis	StACO2	S. tuberosum	Sotub07g018820, Soltu.DM.07G016780	1-aminocyclopropane-1-carboxylate oxidase	AAGGGACTCCGCGCTCATA	CAAGTTGGTCACCAAGGTTAACC	FAM-TCGATGTTCCTCCCATGCGCC-MGB	PompeNovak et al., 2017	97
Jasmonic acid biosynthesis	St13-LOX	S. tuberosum	Sotub03g034620, Soltu.DM.03G037120	13-lipoxygenase	GTACCGGACTCAACACAACCT	CCCATCTGCAGCATAAGGATAGTC	FAM-CATGGGCTGAAACTTC-MGB	Petek et al., 2014	97
Executors of defence	StPR1B	S. tuberosum	Sotub09g006090, Soltu.DM.09G007020; Sotub09g006100, Soltu.DM.09G007030; Sotub09g006110, Soltu.DM.09G007030	pathogenesis related protein 1b	GTATGAATAATTCCACGTACCATATGTTC	GTGGAAACAAGAAGATGCAATACTTAGT	FAM-TGGTATAGTGGCTTACGTTGA-NFQ	Ramšak et al., 2018	100
	StBGLU2	S. tuberosum	Sotub01g009310, Soltu.DM.01G005180; Sotub01g009300, Soltu.DM.01G005170; Sotub01g009360, Soltu.DM.01G005200	glucan endo-1,3-beta-glucosidase, acidic (II)	GATGCCCTTKTGGATTCWATGTA	GTATCKGAAAGTGGYTGGCCTT	n.a.	Kogovšek et al., 2011	97
Abscisic acid signaling	StRD29	S. tuberosum	Sotub03g014340, Soltu.DM.03G017570	responsive to desiccation 29B	AATTGCTGATAAGGCGGTTG	GCTGTTGCCTGAGTTTCCTC	n.a.	Filipić et al. 2023, (provided by Sophia Sonnenwald, FAU)	97
Reference genes	StCOX	S. tuberosum	Sotub04g015050	cytochrome oxidase	CGTCGCATTCCAGATTATCCA	CAACTACGGATATATAAGRRCCRRAACTG	FAM-TGCTTACGCTGGATGGAATGCCCT-TAMRA	Weller et al., 2000	93
	StEF-1	S. tuberosum	Sotub06g010680, Soltu.DM.06G005680	potato elongation factor 1α	GGAAGCTGCTGAGATGAACAAGA	CTCACGTTCAGCCTTAAGTTTGTC	FAM-TCATTCAAGTATGCCTGGGTGCT-TAMRA	Baebler et al., 2009	100
	StNPR1	S. tuberosum	Sotub07g011600, Soltu.DM.07G011890	Non-expressor of PR1	TCCCTCAAACGTCTATCAGAAACAC	CGTCAGCGAAGAAGTCGAAAT	FAM-AGTCTATCTTCGATGCGTCTTCGCCG-NFQ	Petek et al., 2014	95
Bacterial presence	PaeniV3V4	Paenibacillus sp.	GenBank: MK373698.1	V3-V4 region of 16S rRNA gene	CCGGAATTATTGGGCGTAAA	TTGAGCCCCGGGATTAAAC	FAM-CGCGCAGGCGGTCATTTAAGTCTG-NFQ	this work	94

## Sheet: S3_GeneClusters
Table S3: Gene clusters identified in Paenibacillus sp. ST1 by antiSMASH and rhizoSMASH
ClusterID	IdentifiedBy	Type	From	To	Most similar known cluster	Cluster Group	Similarity Confidence
antiSMASH_c1	antiSMASH	phosphonate	181082	206613
antiSMASH_c2	antiSMASH	lanthipeptide-class-iv	307701	330424
antiSMASH_c3	antiSMASH	terpene,lanthipeptide-class-ii	331725	362239
antiSMASH_c4	antiSMASH	NRP-metallophore,NRPS	1076208	1128315	bacillibactin	NRPS:Type I	High
antiSMASH_c5	antiSMASH	terpene	1516174	1537046	carotenoid	terpene	Low
antiSMASH_c6	antiSMASH	NRPS	2025235	2095430
antiSMASH_c7	antiSMASH	terpene-precursor	3284809	3305714
antiSMASH_c8	antiSMASH	cyclic-lactone-autoinducer	3418647	3438883
antiSMASH_c9	antiSMASH	cyclic-lactone-autoinducer	3440226	3460462
antiSMASH_c10	antiSMASH	NRPS,NRPS-like	3787177	3896991	paenilipoheptin	NRPS:Type I+PKS	Low
antiSMASH_c11	antiSMASH	terpene	4604613	4626508
antiSMASH_c12	antiSMASH	terpene-precursor	4778853	4801237
antiSMASH_c13	antiSMASH	T3PKS	4949507	4990664
antiSMASH_c14	antiSMASH	NI-siderophore	5026073	5064763	staphyloferrin B	other:other	Low
antiSMASH_c15	antiSMASH	NRPS-like	5371199	5414906
antiSMASH_c16	antiSMASH	lassopeptide	5683674	5707657	paeninodin	ribosomal:unmodified	Low
antiSMASH_c17	antiSMASH	proteusin	6403902	6424144
rhizoSMASH_c1	rhizoSMASH	Inositol	557856	575490	inositol iol	Carbohydrate	0.44
rhizoSMASH_c2	rhizoSMASH	Threonate_Erythronate	650162	662455
rhizoSMASH_c3	rhizoSMASH	L-Lysine_monooxygenase	1501064	1513513
rhizoSMASH_c4	rhizoSMASH	Xylose	1896487	1909736	xylan xyl-xyn	Carbohydrate	0.5
rhizoSMASH_c5	rhizoSMASH	Mannitol	2483282	2498432	mannitol mtl	Carbohydrate	1
rhizoSMASH_c6	rhizoSMASH	Glutamate_dehydrogenase	2701712	2713088
rhizoSMASH_c7	rhizoSMASH	Xylan	2770849	2784263
rhizoSMASH_c8	rhizoSMASH	Glutaminase	3167079	3178728
rhizoSMASH_c9	rhizoSMASH	Xylan	3755649	3769344
rhizoSMASH_c10	rhizoSMASH	Glutamine_synthetase	3897056	3907098
rhizoSMASH_c11	rhizoSMASH	Xylan	4107812	4121917
rhizoSMASH_c12	rhizoSMASH	Xylan	4203021	4215137
rhizoSMASH_c13	rhizoSMASH	Xylan	4284852	4300611
rhizoSMASH_c14	rhizoSMASH	Xanthine	4414170	4430107	xanthine puc	Aromatic	0.4
rhizoSMASH_c15	rhizoSMASH	Sucrose_hydrolase	4827918	4841387
rhizoSMASH_c16	rhizoSMASH	Trehalose_PTS	4977845	4991608	trehalose tre	Carbohydrate	1
rhizoSMASH_c17	rhizoSMASH	Sucrose_phosphorylase	5465492	5477932
rhizoSMASH_c18	rhizoSMASH	Fructose_PTS	5576573	5589615	fructose fru	Carbohydrate	1
rhizoSMASH_c19	rhizoSMASH	Glutamine_synthetase	5732906	5749214
rhizoSMASH_c20	rhizoSMASH	L-Proline	6425354	6438069

## Sheet: S4_qPCR_PlantResponse
Table S4: Relative expression of defense- and stress-related genes in potato roots in response to bacterial inoculation and flagellin treatment. Relative gene expression values measured in Rywal roots following different stimuli, including flagellin (Flg22) treatment and inoculation with Bacillus subtilis PS-216 or Paenibacillus sp. strain ST1. Non-inoculated plants served as controls. Expression…
Flagellin
Sample ID	Genotype	Tissue	Treatment	Strain	StRBOHD1&2	StPR1b	StBGLU2	StHSP70	StPTI5	St13-LOX	StCAT1	StCALS	StTRXH	StARF2	StACO2	StERF1	StRD29
BS1266	Rywal	roots	noninoculated	/	0.807333	0.207302	0.224034	1.97282	0.16822	0.326459	1.74114	1.10708	1.00492	0.97996	0.114675	1.2706	0.0954
BS1267	Rywal	roots	noninoculated	/	0.749695	0.04146	/	2.00157	0.2438	0.364561	0.879329	1.23385	0.756366	0.815725	0.190133	0.927273	0.112889
BS1268	Rywal	roots	noninoculated	/	0.812972	0.207302	0.200612	1.86198	0.194621	0.335905	1.27227	1.34744	0.872848	0.859056	0.111338	1.10371	0.072048
BS1269	Rywal	roots	noninoculated	/	/	/	/	/	/	/	/	/	/	/	/	/	/
BS1278	Rywal	roots	inoculated	Flg22	0.520557	0.04146	1.07622	2.20166	0.514195	0.913238	2.51126	1.05721	1.01307	1.59693	0.437623	1.41853	0.375652
BS1279	Rywal	roots	inoculated	Flg22	0.504207	0.04146	0.446727	1.89273	0.44163	1.02875	2.27913	0.992748	1.53854	1.02408	/	1.10627	1.21437
BS1280	Rywal	roots	inoculated	Flg22	0.414303	0.04146	1.04943	2.12439	0.345792	0.675665	1.0586	0.741514	1.05117	0.416901	0.345731	1.58526	0.266247
BS1281	Rywal	roots	inoculated	Flg22	0.509811	3.72464	4.15463	2.06466	0.716067	1.01394	1.14495	0.799589	1.09858		0.81289	1.71856	0.405851
B.subtilis
Sample ID	Genotype	Tissue	Treatment	Strain	StRBOHD1&2	StPR1b	StBGLU2	StHSP70	StPTI5	St13-LOX	StCAT1	StCALS	StTRXH	StARF2	StACO2	StERF1	StRD29
BS227	Rywal	roots	noninoculated	/	0.839861	0.31276	1.43604	0.743283	1.05369	0.914917	1.47797	0.753621	0.60605	0.711886	0.043748	1.04745	0.019894
BS228	Rywal	roots	noninoculated	/	0.465797	0.062552	0.717377	0.21726	1.35752	0.354098	1.57588	0.891095	0.637964	1.25691	0.046897	1.09502	0.030901
BS229	Rywal	roots	noninoculated	/	0.715662	0.31276	0.365233	0.484006	1.07742	0.218343	0.483537	0.914486	0.516573	0.692041	0.095213	1.22256	0.022948
BS230	Rywal	roots	noninoculated	/	0.49288	0.062552	1.34396	0.291849	1.26901	0.349402	/	/	/	/	/	/	/
BS231	Rywal	roots	inoculated	B. subtillis PS-216	0.418678	2.66101	9.7009	1.00416	1.5197	1.35869	/	3.02414	2.83801	0.412334	5.60532	1.80339	6.3e-05
BS232	Rywal	roots	inoculated	B. subtillis PS-216	0.839694	0.31276	0.501198	1.92896	1.93082	1.64586	2.77109	4.23387	4.16519	2.18515	0.587341	0.002833	/
BS233	Rywal	roots	inoculated	B. subtillis PS-216	0.687185	0.062552	0.241553	3.2322	1.57154	2.5805	7.35787	3.28043	4.3564	1.84525	2.70404	1.5687	0.007671
BS234	Rywal	roots	inoculated	B. subtillis PS-216	0.292128	0.062552	0.110057	3.26438	1.62171	1.64363	7.13894	3.31635	2.67828	1.08782	3.5534	1.52243	0.010762
Paenibacillus sp. strain ST1
Sample ID	Genotype	Tissue	Treatment	Strain	StRBOHD1&2	StPR1b	StBGLU2	StHSP70	StPTI5	St13-LOX	StCAT1	StCALS	StTRXH	StARF2	StACO2	StERF1	StRD29
PT0074	Rywal	roots	noninoculated	/	1.04497	2.44481	2.65942	0.166034	0.068921	0.188927	1.13461	2.98348	1.94464	1.62976	1.39576	1.06207	0.012297
PT0075	Rywal	roots	noninoculated	/	/	0.230474	1.36832	/	0.037185	0.163831	0.983295	2.44519	1.64928	1.5125	1.41606	1.10889	0.022608
PT0076	Rywal	roots	noninoculated	/	0.916379	1.32373	1.13088	0.157889	0.072993	0.201284	1.50626	3.42401	2.25323	2.25996	1.39178	1.45506	0.038285
PT0077	Rywal	roots	noninoculated	/	1.29301	3.51377	2.63994	/	0.07566	0.202564	1.04501	1.91242	1.80321	1.74064	1.4435	1.19353	6.1e-05
PT0078	Rywal	roots	inoculated	Paenibacillus sp. ST1	/	/	/	/	/	/	1.70145	2.15029	2.46202	4.04168	1.28366	2.44372	0.058756
PT0079	Rywal	roots	inoculated	Paenibacillus sp. ST1	/	12.3014	13.4455	0.678866	0.641442	0.567529	1.91686	1.91235	2.23991	3.81654	1.36689	2.33474	0.205475
PT0080	Rywal	roots	inoculated	Paenibacillus sp. ST1	0.791276	0.849927	4.8533	0.596085	0.730171	0.551147	1.83873	2.39957	2.55704	2.27798	1.51024	2.30559	0.182461
PT0081	Rywal	roots	inoculated	Paenibacillus sp. ST1	0.524742	1.09036	3.42512	0.490577	0.669458	0.47328	1.42561	2.05381	2.54844	2.45609	1.51737	1.99449	0.024353

## Sheet: S5_qPCR_PlantResponseStat
Table S5: Statistical analysis of potato root gene expression in response to bacterial treatments. For statistical analysis One-way ANOVA followed by Tukey’s multiple comparison test, was used. Only comparisons with p < 0.05 are shown; all other comparisons were not statistically significant.
Gene	Comparisson	Adjusted p-value
StHSP70	ST1 vs control	0.0071
	PS-216 vs flg22	0.0394
	ST1 vs PS-216	0.0003
StRBOHD1&2	PS-216 vs control	0.0187
	flg22 vs control	0.0082
StPTI5	PS-216 vs flg22	0.0025
	ST1 vs PS-216	0.0046
	PS-216 vs control	0.0006
St13-LOX	PS-216 vs flg22	0.0035
	ST1 vs PS-216	0.0001
	PS-216 vs Control	<0.0001
	flg22 vs control	0.0269
StACO2	ST1 vs PS-216	0.0465
	PS-216 vs control	0.0300
StERF1	ST1 vs control	0.0330
StCAT1	PS-216 vs flg22	0.0082
	PS-216 vs control	0.0050
StCALS	PS-216 vs flg22	<0.0001
	ST1 vs PS-216	<0.0001
	PS-216 vs control	<0.0001
StTRXH	PS-216 vs flg22	<0.0001
	ST1 vs PS-216	0.0160
	PS-216 vs control	<0.0001
	ST1 vs flg22	0.0337
	ST1 vs control	0.0068
StRD29	PS-216 vs flg22	0.0400
	flg22 vs control	0.0297

## Sheet: S6_RNAseq_DEA
Table S6. Differentially expressed genes (DEGs) in Paenibacillus sp. ST1 during root incubation and in planta colonization relative to control conditions. RNA-seq results include log₂ fold change, statistical significance, and gene annotations. Genes and operons discussed in the main text are highlighted in purple.
#	PGAP genome annotation												eggNOG functional gene annotations														operon prediction		gene clusters						"in planta VS in culture" stats							"with roots VS without roots (both in culture)" stats							Normalised CPMs (samples: blue -in_culture; green - in_planta)
AGAT_GeneID	LocusTag	start	end	strand	ShortName	gene_biotype	go_component	go_function	go_process	Ontology_term	product	Note	eggNOG_Description	eggNOG_Preferred_name	eggNOG_GOs	eggNOG_EC	eggNOG_KEGG_ko	eggNOG_KEGG_Pathway	eggNOG_KEGG_Module	eggNOG_KEGG_Reaction	eggNOG_KEGG_rclass	eggNOG_BRITE	eggNOG_KEGG_TC	eggNOG_CAZy	eggNOG_BiGG_Reaction	eggNOG_PFAMs	Operon Mapper	OperonSEQer	antiSMASH cluster_No	antiSMASH cluster_Name	antiSMASH Most similar known cluster	rhizoSMASH cluster_No	rhizoSMASH cluster_Name	rhizoSMASH Most similar known cluster	logFC_voomLmFit_A_03	logFC_edgeR_qlm_A_03	logFC_DESeq2_A_03	adjp_voomLmFit_A_03	adjp_edgeR_qlm_A_03	adjp_DESeq2_A_03	adjp < 0.05 AND |logFC| > 1 with all methods_A_03	logFC_voomLmFit_A_04	logFC_edgeR_qlm_A_04	logFC_DESeq2_A_04	adjp_voomLmFit_A_04	adjp_edgeR_qlm_A_04	adjp_DESeq2_A_04	adjp < 0.05 AND |logFC| > 1 with all methods_A_04	PT013.norm
agat-gene-1	paeni_NIB01_000001	61	777	+		protein_coding					NPP1 family protein		Necrosis inducing protein (NPP1)	-	-	-	-	-	-	-	-	-	-	-	-	MFS_1,NPP1	operon0001								0.692471	0.644811	0.592489	0.0172522	0.0146288	0.0211855	FALSE	NA	NA	NA	NA	NA	NA	#VALUE!	2.49823
agat-gene-2	paeni_NIB01_000002	845	1261	-		protein_coding					DUF4395 domain-containing protein		Domain of unknown function (DUF4395)	-	-	-	-	-	-	-	-	-	-	-	-	DUF4395	operon0002	operon0001							0.965308	0.813264	0.777981	0.00138319	0.00239377	6.5171e-05	FALSE	1.99123	2.12124	2.06793	1.01696e-08	3.88257e-06	5.97763e-30	TRUE	41.463
agat-gene-3	paeni_NIB01_000003	1351	2274	-		protein_coding					ketopantoate reductase family protein		2-dehydropantoate 2-reductase	-	-	1.1.1.169	ko:K00077	ko00770,ko01100,ko01110,map00770,map01100,map01110	M00119	R02472	RC00726	ko00000,ko00001,ko00002,ko01000	-	-	-	ApbA	operon0003	operon0001							3.38205	3.31155	3.24786	2.85919e-06	2.80349e-06	3.20279e-36	TRUE	NA	NA	NA	NA	NA	NA	#VALUE!	3.56265
agat-gene-4	paeni_NIB01_000004	2443	3003	+		protein_coding					TetR/AcrR family transcriptional regulator		Transcriptional regulator	yxbF	-	-	-	-	-	-	-	-	-	-	-	TetR_C_8,TetR_N	operon0004								0.587402	0.504226	0.472838	0.024659	0.0517113	0.0185559	FALSE	1.19179	1.15787	1.0823	8.98634e-06	0.000108245	6.71643e-08	TRUE	13.7608
agat-gene-7	paeni_NIB01_000007	4644	5822	-	bioF	protein_coding		8-amino-7-oxononanoate synthase activity|0008710||IEA	biotin biosynthetic process|0009102||IEA	GO:0009102, GO:0008710	8-amino-7-oxononanoate synthase		Catalyzes the decarboxylative condensation of pimeloyl- acyl-carrier protein and L-alanine to produce 8-amino-7- oxononanoate (AON), acyl-carrier protein , and carbon dioxide	bioF	GO:0003674,GO:0003824,GO:0006082,GO:0006732,GO:0006766,GO:0006767,GO:0006768,GO:0006790,GO:0006807,GO:0008150,GO:0008152,GO:0008710,GO:0009058,GO:0009102,GO:0009108,GO:0009110,GO:0009987,GO:0016053,GO:0016740,GO:0016746,GO:0016747,GO:0017144,GO:0018130,GO:0019752,GO:0032787,GO:0034641,GO:0042364,GO:0043436,GO:0043603,GO:0043604,GO:0044237,GO:0044249,GO:0044271,GO:0044272,GO:0044281,GO:0044283,GO:…	2.3.1.29,2.3.1.47,6.2.1.14	ko:K00639,ko:K00652,ko:K01906	ko00260,ko00780,ko01100,map00260,map00780,map01100	M00123,M00573,M00577	R00371,R03209,R03210,R10124	RC00004,RC00014,RC00039,RC00394,RC02725	ko00000,ko00001,ko00002,ko01000,ko01007	-	-	iSB619.SA_RS12695	Aminotran_1_2	operon0005	operon0002							4.11684	3.98211	3.9406	3.21336e-07	4.78958e-07	1.3672e-63	TRUE	NA	NA	NA	NA	NA	NA	#VALUE!	3.58454
agat-gene-10	paeni_NIB01_000010	7568	8926	-	bioA	protein_coding		adenosylmethionine-8-amino-7-oxononanoate transaminase activity|0004015||IEA	biotin biosynthetic process|0009102||IEA	GO:0009102, GO:0004015	adenosylmethionine--8-amino-7-oxononanoate transaminase		Catalyzes the transfer of the alpha-amino group from S- adenosyl-L-methionine (SAM) to 7-keto-8-aminopelargonic acid (KAPA) to form 7,8-diaminopelargonic acid (DAPA). It is the only animotransferase known to utilize SAM as an amino donor	bioA	-	2.6.1.105,2.6.1.62	ko:K00833,ko:K19563	ko00780,ko01100,map00780,map01100	M00123,M00573,M00577	R03231,R10699	RC00006,RC00062,RC00887	ko00000,ko00001,ko00002,ko01000,ko01007	-	-	iSB619.SA_RS12705	Aminotran_3	operon0005	operon0002							4.80758	4.74025	4.71837	1.82881e-08	3.76663e-08	6.30766e-183	TRUE	NA	NA	NA	NA	NA	NA	#VALUE!	4.06613
agat-gene-6	paeni_NIB01_000006	3850	4647	-		protein_coding					alpha/beta hydrolase		Alpha beta hydrolase	bioH	-	2.1.1.197,3.1.1.85	ko:K02169,ko:K02170	ko00780,ko01100,map00780,map01100	M00572	R09543,R09725	RC00003,RC00460,RC00461	ko00000,ko00001,ko00002,ko01000	-	-	-	Abhydrolase_1,Abhydrolase_6	operon0005	operon0002							2.75412	2.67121	2.6376	2.36602e-06	2.87657e-06	2.32753e-38	TRUE	NA	NA	NA	NA	NA	NA	#VALUE!	4.43553
agat-gene-8	paeni_NIB01_000008	5836	6834	-	bioB	protein_coding		biotin synthase activity|0004076||IEA, 2 iron, 2 sulfur cluster binding|0051537||IEA, 4 iron, 4 sulfur cluster binding|0051539||IEA, S-adenosyl-L-methionine binding|1904047||IEA	biotin biosynthetic process|0009102||IEA	GO:0009102, GO:0004076, GO:0051537, GO:0051539, GO:1904047	biotin synthase BioB		Catalyzes the conversion of dethiobiotin (DTB) to biotin by the insertion of a sulfur atom into dethiobiotin via a radical- based mechanism	bioB	-	2.8.1.6	ko:K01012	ko00780,ko01100,map00780,map01100	M00123,M00573,M00577	R01078	RC00441	ko00000,ko00001,ko00002,ko01000	-	-	iYO844.BSU30200	BATS,Radical_SAM	operon0005	operon0002							4.77704	4.65152	4.61675	8.7731e-08	1.52432e-07	6.61459e-98	TRUE	NA	NA	NA	NA	NA	NA	#VALUE!	2.46266
agat-gene-9	paeni_NIB01_000009	6837	7571	-	bioD	protein_coding		dethiobiotin synthase activity|0004141||IEA	biotin biosynthetic process|0009102||IEA	GO:0009102, GO:0004141	dethiobiotin synthase		Catalyzes a mechanistically unusual reaction, the ATP- dependent insertion of CO2 between the N7 and N8 nitrogen atoms of 7,8-diaminopelargonic acid (DAPA) to form an ureido ring	bioD	GO:0003674,GO:0003824,GO:0004141,GO:0005575,GO:0005622,GO:0005623,GO:0005737,GO:0005829,GO:0006082,GO:0006732,GO:0006766,GO:0006767,GO:0006768,GO:0006790,GO:0006807,GO:0008150,GO:0008152,GO:0009058,GO:0009102,GO:0009108,GO:0009110,GO:0009987,GO:0016053,GO:0016874,GO:0016879,GO:0016882,GO:0017144,GO:0018130,GO:0019752,GO:0032787,GO:0034641,GO:0042364,GO:0043436,GO:0043603,GO:0043604,GO:0044237,GO:…	2.1.1.197,2.7.1.21,6.3.2.3,6.3.3.3	ko:K00857,ko:K01920,ko:K01935,ko:K02169	ko00240,ko00270,ko00480,ko00780,ko00983,ko01100,map00240,map00270,map00480,map00780,map00983,map01100	M00118,M00123,M00572,M00573,M00577	R00497,R01567,R02099,R03182,R08233,R09543,R10994	RC00002,RC00003,RC00017,RC00096,RC00141,RC00460,RC00868	ko00000,ko00001,ko00002,ko01000	-	-	-	AAA_26	operon0005	operon0002							4.7039	4.64361	4.62466	3.11899e-08	5.78035e-08	1.23135e-160	TRUE	NA	NA	NA	NA	NA	NA	#VALUE!	1.70471
agat-gene-5	paeni_NIB01_000005	3006	3869	-	bioC	protein_coding		O-methyltransferase activity|0008171||IEA	biotin biosynthetic process|0009102||IEA	GO:0009102, GO:0008171	malonyl-ACP O-methyltransferase BioC		Converts the free carboxyl group of a malonyl-thioester to its methyl ester by transfer of a methyl group from S-adenosyl- L-methionine (SAM). It allows to synthesize pimeloyl-ACP via the fatty acid synthetic pathway	bioC	GO:0003674,GO:0003824,GO:0006082,GO:0006732,GO:0006766,GO:0006767,GO:0006768,GO:0006790,GO:0006807,GO:0008150,GO:0008152,GO:0009058,GO:0009102,GO:0009108,GO:0009110,GO:0009987,GO:0016053,GO:0017144,GO:0018130,GO:0019752,GO:0032787,GO:0034641,GO:0042364,GO:0043436,GO:0043603,GO:0043604,GO:0044237,GO:0044249,GO:0044271,GO:0044272,GO:0044281,GO:0044283,GO:0046394,GO:0046483,GO:0051186,GO:0051188,GO:…	2.1.1.197	ko:K02169	ko00780,ko01100,map00780,map01100	M00572	R09543	RC00003,RC00460	ko00000,ko00001,ko00002,ko01000	-	-	-	Methyltransf_11,Methyltransf_23,Methyltransf_25,Methyltransf_31	operon0005	operon0002							2.07055	2.07007	2.02837	6.70701e-06	9.00073e-06	1.13315e-27	TRUE	NA	NA	NA	NA	NA	NA	#VALUE!	7.98724
agat-gene-11	paeni_NIB01_000011	9256	10035	-		protein_coding					cobalamin biosynthesis protein CbiX		Cobalamin biosynthesis protein CbiX	cbiX	-	4.99.1.3	ko:K03795	ko00860,ko01100,ko01120,map00860,map01100,map01120	-	R05807	RC01012	ko00000,ko00001,ko01000	-	-	-	CbiX	operon0006	operon0003							-0.353258	-0.537944	-0.519645	0.0740278	0.0293129	0.0195777	FALSE	-0.0822081	0.0851372	0.0513154	0.55934	0.682497	0.80486	FALSE	262.156
agat-gene-12	paeni_NIB01_000012	10038	10328	-		protein_coding					YerC/YecD family TrpR-related protein		protein, YerC YecD	yerC	-	-	ko:K03720	-	-	-	-	ko00000,ko03000	-	-	-	Trp_repressor	operon0006	operon0003							0.388425	0.250093	0.223901	0.0576091	0.242705	0.301756	FALSE	0.13666	0.239612	0.185961	0.41396	0.262035	0.345994	FALSE	88.3959
agat-gene-13	paeni_NIB01_000013	10778	11410	+		protein_coding					tyrosine protein kinase		-	-	-	-	-	-	-	-	-	-	-	-	-	-	operon0007								-2.08643	-2.01355	-1.9666	0.000191171	5.8289e-05	6.12886e-14	TRUE	NA	NA	NA	NA	NA	NA	#VALUE!	19.5152
agat-gene-14	paeni_NIB01_000014	11588	12685	+		protein_coding					DNA alkylation repair protein		DNA alkylation repair	yhaZ	-	-	-	-	-	-	-	-	-	-	-	DNA_alkylation	operon0008								0.335399	0.26991	0.248563	0.0595851	0.122146	0.143289	FALSE	0.190992	0.114753	0.0810126	0.130723	0.556327	0.679601	FALSE	84.2477
agat-gene-15	paeni_NIB01_000015	13047	14006	-	corA	protein_coding		cobalt ion transmembrane transporter activity|0015087||IEA, magnesium ion transmembrane transporter activity|0015095||IEA	cobalt ion transport|0006824||IEA, magnesium ion transport|0015693||IEA	GO:0006824, GO:0015693, GO:0015087, GO:0015095	magnesium/cobalt transporter CorA		Mediates influx of magnesium ions	corA	GO:0005575,GO:0005623,GO:0005886,GO:0005887,GO:0016020,GO:0016021,GO:0031224,GO:0031226,GO:0044425,GO:0044459,GO:0044464,GO:0071944	-	ko:K03284	-	-	-	-	ko00000,ko02000	1.A.35.1,1.A.35.3	-	iYO844.BSU08000	CorA	operon0009								-3.02083	-3.10931	-3.10678	2.29269e-06	1.99033e-07	4.32909e-63	TRUE	-0.348114	-0.388833	-0.368815	0.0667339	0.0657675	0.0589548	FALSE	143.037
agat-gene-17	paeni_NIB01_000017	15363	15980	-		protein_coding					DUF47 domain-containing protein		Phosphate transport regulator (distant homolog of PhoU)	ykaA	-	-	ko:K07220	-	-	-	-	ko00000	-	-	-	PhoU_div	operon0010	operon0004							-2.68225	-2.76583	-2.78204	4.36607e-08	6.01174e-08	4.12513e-106	TRUE	0.87679	0.871027	0.826095	1.09015e-06	9.21346e-05	1.32104e-11	FALSE	587.709
agat-gene-16	paeni_NIB01_000016	14359	15348	-		protein_coding					inorganic phosphate transporter		phosphate transporter	pit	GO:0003674,GO:0005215,GO:0005315,GO:0005575,GO:0005623,GO:0005886,GO:0005887,GO:0006810,GO:0006811,GO:0006817,GO:0006820,GO:0008150,GO:0015291,GO:0015318,GO:0015698,GO:0016020,GO:0016021,GO:0022804,GO:0022857,GO:0031224,GO:0031226,GO:0034220,GO:0035435,GO:0044425,GO:0044459,GO:0044464,GO:0051179,GO:0051234,GO:0055085,GO:0071944,GO:0098656,GO:0098660,GO:0098661	-	ko:K03306	-	-	-	-	ko00000	2.A.20	-	-	PHO4	operon0010	operon0004							-3.21721	-3.29658	-3.30305	1.62441e-08	2.6239e-08	6.94513e-165	TRUE	0.568212	0.555786	0.514344	3.5615e-05	0.00100949	3.00481e-06	FALSE	925.882
agat-gene-18	paeni_NIB01_000018	16197	17264	-		protein_coding					DUF3048 domain-containing protein		Protein of unknown function (DUF3048) C-terminal domain	yerB	-	-	-	-	-	-	-	-	-	-	-	DUF3048,DUF3048_C	operon0011								-1.68542	-1.65078	-1.63926	2.93986e-05	1.68872e-05	5.54286e-20	TRUE	-0.35767	-0.373774	-0.335879	0.10179	0.123718	0.137933	FALSE	66.232
agat-gene-19	paeni_NIB01_000019	17605	18144	+		protein_coding					DoxX family protein		DoxX	M1-1022	-	1.8.5.2	ko:K15977,ko:K16937	ko00920,ko01120,map00920,map01120	-	R07177	-	ko00000,ko00001,ko01000	3.D.4.9	-	-	DoxX	operon0012								4.67489	5.0207	4.96681	1.34844e-06	1.08243e-06	3.77209e-48	TRUE	2.63488	3.14093	2.96629	1.10146e-06	6.88158e-05	1.08389e-09	TRUE	1.64725
agat-gene-20	paeni_NIB01_000020	18304	18516	+		protein_coding					hypothetical protein		-	-	-	-	-	-	-	-	-	-	-	-	-	-	operon0013								-0.559745	-0.560096	-0.547203	0.00497674	0.00670113	5.11454e-05	FALSE	-0.234211	-0.251629	-0.199783	0.390466	0.461151	0.443866	FALSE	53.1662
agat-gene-21	paeni_NIB01_000021	18696	19484	-		protein_coding					dioxygenase		MFS transporter	ygiD	GO:0003674,GO:0003824,GO:0008150,GO:0008152,GO:0016491,GO:0046566,GO:0051213,GO:0055114	1.13.11.8	ko:K04100,ko:K15777	ko00362,ko00624,ko00627,ko00965,ko01120,map00362,map00624,map00627,map00965,map01120	-	R01632,R03550,R04280,R08836,R09565	RC00233,RC00387,RC00535,RC02567,RC02694	br01602,ko00000,ko00001,ko01000	-	-	-	LigB	operon0014								3.29171	3.31744	3.27697	3.32299e-07	1.25267e-06	2.05695e-36	TRUE	0.0505556	0.174299	0.129762	0.705853	0.391322	0.50246	FALSE	50.1398
agat-gene-22	paeni_NIB01_000022	19664	20494	-		protein_coding					alpha/beta hydrolase		of the alpha beta superfamily	yfhR3	-	-	ko:K06889	-	-	-	-	ko00000	-	-	-	Abhydrolase_1,Hydrolase_4	operon0015								2.56787	2.59995	2.54082	1.6563e-05	1.70335e-05	2.84966e-19	TRUE	0.963026	1.12063	1.02372	1.06954e-05	0.000931969	5.06257e-06	FALSE	20.6344
agat-gene-23	paeni_NIB01_000023	20734	20970	-		protein_coding					hypothetical protein		-	-	-	-	-	-	-	-	-	-	-	-	-	-	operon0016								-1.32644	-1.01584	NA	0.0697662	0.130488	NA	#VALUE!	NA	NA	NA	NA	NA	NA	#VALUE!	2.02212
agat-gene-24	paeni_NIB01_000024	21384	22220	+		protein_coding					hypothetical protein		-	M1-1017	-	-	-	-	-	-	-	-	-	-	-	DUF1129	operon0017								-1.94621	-1.89951	-1.89792	8.1001e-07	8.69725e-07	4.74114e-50	TRUE	-0.0153895	0.0195488	-0.0072772	0.924523	0.926623	0.974852	FALSE	106.36
agat-gene-25	paeni_NIB01_000025	22528	23445	-		protein_coding					AraC family transcriptional regulator		helix_turn_helix, arabinose operon control protein	-	-	-	-	-	-	-	-	-	-	-	-	AraC_binding,HTH_18,HTH_AraC	operon0018								-2.11925	-2.03938	-2.02007	6.86203e-05	7.80184e-06	8.53414e-22	TRUE	-0.0717233	-0.133519	-0.1471	0.604769	0.413051	0.375784	FALSE	86.9922
agat-gene-26	paeni_NIB01_000026	23696	26872	-		protein_coding					copper amine oxidase N-terminal domain-containing protein		Copper amine oxidase N-terminal domain	-	-	-	-	-	-	-	-	-	-	-	-	BNR_assoc_N,Cu_amine_oxidN1,Glyco_hydro_18,Laminin_G_3,Peripla_BP_2	operon0019								4.59168	4.68699	4.67598	2.68775e-08	9.48931e-08	3.33232e-92	TRUE	0.0756319	0.0776194	0.0476203	0.513572	0.627166	0.772536	FALSE	112.924
agat-gene-27	paeni_NIB01_000027	27160	28125	+		protein_coding					hypothetical protein		-	-	-	-	-	-	-	-	-	-	-	-	-	-	operon0020								4.36104	4.44953	4.42561	3.15297e-08	7.63089e-08	4.21637e-102	TRUE	0.70243	0.54741	0.482505	0.000146603	0.00835316	0.00516713	FALSE	8.08574
agat-gene-28	paeni_NIB01_000028	28271	28873	-		protein_coding					GNAT family N-acetyltransferase		Acetyltransferase (GNAT) domain	-	-	3.2.2.20	ko:K01246,ko:K06977	ko03410,map03410	-	-	-	ko00000,ko00001,ko01000,ko03400	-	-	-	Acetyltransf_1,Acetyltransf_10	operon0021	operon0005							-0.295045	-0.162273	-0.156385	0.312355	0.517443	0.530843	FALSE	0.133374	0.197239	0.160415	0.280417	0.187722	0.262954	FALSE	82.5786
agat-gene-29	paeni_NIB01_000029	28873	30165	-	ilvA	protein_coding		L-threonine ammonia-lyase activity|0004794||IEA	cellular amino acid metabolic process|0006520||IEA	GO:0006520, GO:0004794	threonine ammonia-lyase IlvA		Catalyzes the anaerobic formation of alpha-ketobutyrate and ammonia from threonine in a two-step reaction. The first step involved a dehydration of threonine and a production of enamine intermediates (aminocrotonate), which tautomerizes to its imine form (iminobutyrate). Both intermediates are unstable and short- lived. The second step is the nonenzymatic hydrolysis of the enamine imine intermedi…	ilvA	GO:0006082,GO:0006520,GO:0006566,GO:0006807,GO:0008150,GO:0008152,GO:0009066,GO:0009987,GO:0019752,GO:0043436,GO:0044237,GO:0044238,GO:0044281,GO:0071704,GO:1901564,GO:1901605	4.3.1.19	ko:K01754	ko00260,ko00290,ko01100,ko01110,ko01130,ko01200,ko01230,map00260,map00290,map01100,map01110,map01130,map01200,map01230	M00570	R00220,R00996	RC00418,RC02600	ko00000,ko00001,ko00002,ko01000	-	-	-	PALP,Thr_dehydrat_C	operon0021	operon0005							0.0196411	0.114761	0.0850368	0.939077	0.627412	0.681819	FALSE	0.447621	0.497687	0.452169	0.00129678	0.00336438	0.000274432	FALSE	149.9
agat-gene-30	paeni_NIB01_000030	30519	31124	-		protein_coding					alpha/beta hydrolase		Carboxylesterase	mhqD	-	-	ko:K06999	-	-	-	-	ko00000	-	-	-	Abhydrolase_2,DLH	operon0022	operon0006							2.38428	2.35332	2.30145	4.0953e-06	1.69902e-05	1.23175e-19	TRUE	0.0507435	-0.0795174	-0.0797	0.843652	0.769113	0.764304	FALSE	6.78053
agat-gene-31	paeni_NIB01_000031	31139	32092	-		protein_coding					ring-cleaving dioxygenase		Ring-cleaving dioxygenase	mhqO	-	-	ko:K15975	-	-	-	-	ko00000	-	-	-	Glyoxalase	operon0022	operon0006							2.6642	2.57986	2.52891	2.17022e-06	7.8535e-06	8.0023e-25	TRUE	0.450547	0.514346	0.361987	0.140315	0.160132	0.198478	FALSE	6.7778
agat-gene-32	paeni_NIB01_000032	32403	33485	-		protein_coding					hemolysin family protein		Transporter associated domain protein	corC1	-	-	ko:K03699,ko:K06189	-	-	-	-	ko00000,ko02000,ko02042	9.A.40.1.2	-	-	CBS,CorC_HlyC,DUF21	operon0023								0.703171	0.835263	0.788435	0.0228752	0.020507	0.00981782	FALSE	-0.060697	-0.065175	-0.0826629	0.681878	0.723479	0.657491	FALSE	83.4241
agat-gene-33	paeni_NIB01_000033	33754	35091	-		protein_coding					hemolysin family protein		Hemolysins and related proteins containing CBS domains	corC1	-	-	ko:K03699,ko:K06189	-	-	-	-	ko00000,ko02000,ko02042	9.A.40.1.2	-	-	CBS,CorC_HlyC,DUF21	operon0023								1.43235	1.56252	1.50578	0.000353159	0.000490344	3.56151e-07	TRUE	0.0661112	0.0400259	0.0101341	0.641683	0.816413	0.960539	FALSE	95.6717
agat-gene-35	paeni_NIB01_000035	37212	38759	-	purH	protein_coding		catalytic activity|0003824||IEA, IMP cyclohydrolase activity|0003937||IEA, phosphoribosylaminoimidazolecarboxamide formyltransferase activity|0004643||IEA	purine nucleotide biosynthetic process|0006164||IEA, 'de novo' IMP biosynthetic process|0006189||IEA	GO:0006164, GO:0006189, GO:0003824, GO:0003937, GO:0004643	bifunctional phosphoribosylaminoimidazolecarboxamide formyltransferase/IMP cyclohydrolase		Bifunctional purine biosynthesis protein PurH	purH	GO:0005575,GO:0005623,GO:0005886,GO:0008150,GO:0016020,GO:0040007,GO:0044464,GO:0071944	2.1.2.3,3.5.4.10	ko:K00602	ko00230,ko00670,ko01100,ko01110,ko01130,ko01523,map00230,map00670,map01100,map01110,map01130,map01523	M00048	R01127,R04560	RC00026,RC00263,RC00456	ko00000,ko00001,ko00002,ko01000,ko04147	-	-	iJN678.purH	AICARFT_IMPCHas,MGS	operon0024								0.438234	-1.39411	-0.700104	0.571548	0.183376	NA	FALSE	-1.2188	-1.06433	-1.06168	2.07242e-07	9.73054e-05	3.2451e-12	TRUE	121.727
agat-gene-34	paeni_NIB01_000034	35816	37081	-	purD	protein_coding		phosphoribosylamine-glycine ligase activity|0004637||IEA	'de novo' IMP biosynthetic process|0006189||IEA, purine ribonucleotide biosynthetic process|0009152||IEA	GO:0006189, GO:0009152, GO:0004637	phosphoribosylamine--glycine ligase		Belongs to the GARS family	purD	-	6.3.4.13	ko:K01945	ko00230,ko01100,ko01110,ko01130,map00230,map01100,map01110,map01130	M00048	R04144	RC00090,RC00166	ko00000,ko00001,ko00002,ko01000	-	-	iSB619.SA_RS05245,iYO844.BSU06530	GARS_A,GARS_C,GARS_N	operon0024								1.22152	-0.464008	-0.299685	0.142844	0.630537	NA	FALSE	-1.17344	-1.05649	-1.04814	1.66434e-06	0.00013658	1.38888e-10	TRUE	34.729
agat-gene-37	paeni_NIB01_000037	39711	40751	-	purM	protein_coding		phosphoribosylformylglycinamidine cyclo-ligase activity|0004641||IEA	'de novo' IMP biosynthetic process|0006189||IEA, purine ribonucleotide biosynthetic process|0009152||IEA	GO:0006189, GO:0009152, GO:0004641	phosphoribosylformylglycinamidine cyclo-ligase		Catalyzes the formation of 1-(5-phosphoribosyl)-5-aminoimidazole from 2-(formamido)-N1-(5-phosphoribosyl)acetamidine and ATP in purine biosynthesis	purM	GO:0003674,GO:0003824,GO:0004641,GO:0005575,GO:0005622,GO:0005623,GO:0005737,GO:0005829,GO:0006139,GO:0006163,GO:0006164,GO:0006725,GO:0006753,GO:0006793,GO:0006796,GO:0006807,GO:0008150,GO:0008152,GO:0009058,GO:0009117,GO:0009150,GO:0009152,GO:0009165,GO:0009259,GO:0009260,GO:0009987,GO:0016874,GO:0016879,GO:0016882,GO:0018130,GO:0019438,GO:0019637,GO:0019693,GO:0034641,GO:0034654,GO:0044237,GO:…	6.3.3.1,6.3.4.13	ko:K01933,ko:K11788	ko00230,ko01100,ko01110,ko01130,map00230,map01100,map01110,map01130	M00048	R04144,R04208	RC00090,RC00166,RC01100	ko00000,ko00001,ko00002,ko01000	-	-	iAF987.Gmet_1844,iECSF_1327.ECSF_2340	AIRS,AIRS_C	operon0024	operon0007							0.673782	-1.03117	-0.689545	0.389409	0.30062	NA	FALSE	-1.19464	-1.05022	-1.04364	4.31762e-07	0.000137578	7.80724e-11	TRUE	73.1493
agat-gene-36	paeni_NIB01_000036	39094	39711	-	purN	protein_coding		phosphoribosylglycinamide formyltransferase activity|0004644||IEA	purine ribonucleotide biosynthetic process|0009152||IEA	GO:0009152, GO:0004644	phosphoribosylglycinamide formyltransferase		Catalyzes the transfer of a formyl group from 10- formyltetrahydrofolate to 5-phospho-ribosyl-glycinamide (GAR), producing 5-phospho-ribosyl-N-formylglycinamide (FGAR) and tetrahydrofolate	purN	-	2.1.2.2	ko:K11175	ko00230,ko00670,ko01100,ko01110,ko01130,map00230,map00670,map01100,map01110,map01130	M00048	R04325,R04326	RC00026,RC00197,RC01128	ko00000,ko00001,ko00002,ko01000	-	-	-	Formyl_trans_N,YjbR	operon0024	operon0007							0.579034	-1.13278	-0.783233	0.536634	0.258687	NA	FALSE	-1.17759	-0.912811	-0.871651	5.37767e-06	0.00324945	8.86381e-05	FALSE	31.3087
agat-gene-38	paeni_NIB01_000038	40999	41190	+		protein_coding					hypothetical protein																operon0025								0.978367	-0.757443	-0.50071	0.361147	0.455559	NA	FALSE	-1.20638	-1.28344	-1.24977	0.000112692	0.000249675	3.28361e-08	TRUE	11.8016
agat-gene-39	paeni_NIB01_000039	41382	42860	-	purF	protein_coding		amidophosphoribosyltransferase activity|0004044||IEA	purine ribonucleotide biosynthetic process|0009152||IEA	GO:0009152, GO:0004044	amidophosphoribosyltransferase		Catalyzes the formation of phosphoribosylamine from phosphoribosylpyrophosphate (PRPP) and glutamine	purF	GO:0005575,GO:0005622,GO:0005623,GO:0005737,GO:0009507,GO:0009536,GO:0043226,GO:0043227,GO:0043229,GO:0043231,GO:0044424,GO:0044444,GO:0044464	2.4.2.14	ko:K00764	ko00230,ko00250,ko01100,ko01110,ko01130,map00230,map00250,map01100,map01110,map01130	M00048	R01072	RC00010,RC02724,RC02752	ko00000,ko00001,ko00002,ko01000,ko01002	-	-	iSB619.SA_RS05225	GATase_6,GATase_7,Pribosyltran	operon0026	operon0008							0.84977	-0.901152	-0.435975	0.251507	0.361328	NA	FALSE	-1.27854	-1.18658	-1.18706	8.1832e-08	3.97092e-05	3.89239e-16	TRUE	96.7361
agat-gene-40	paeni_NIB01_000040	42845	45088	-	purL	protein_coding		phosphoribosylformylglycinamidine synthase activity|0004642||IEA	'de novo' IMP biosynthetic process|0006189||IEA	GO:0006189, GO:0004642	phosphoribosylformylglycinamidine synthase subunit PurL		Part of the phosphoribosylformylglycinamidine synthase complex involved in the purines biosynthetic pathway. Catalyzes the ATP-dependent conversion of formylglycinamide ribonucleotide (FGAR) and glutamine to yield formylglycinamidine ribonucleotide (FGAM) and glutamate. The FGAM synthase complex is composed of three subunits. PurQ produces an ammonia molecule by converting glutamine to glutamate.…	purL	GO:0000166,GO:0000287,GO:0003674,GO:0003824,GO:0004642,GO:0005488,GO:0005524,GO:0005575,GO:0005622,GO:0005623,GO:0005737,GO:0006139,GO:0006163,GO:0006164,GO:0006725,GO:0006753,GO:0006793,GO:0006796,GO:0006807,GO:0008144,GO:0008150,GO:0008152,GO:0009058,GO:0009117,GO:0009150,GO:0009152,GO:0009165,GO:0009259,GO:0009260,GO:0009987,GO:0016874,GO:0016879,GO:0016884,GO:0017076,GO:0018130,GO:0019438,GO:…	6.3.5.3	ko:K01952	ko00230,ko01100,ko01110,ko01130,map00230,map01100,map01110,map01130	M00048	R04463	RC00010,RC01160	ko00000,ko00001,ko00002,ko01000	-	-	-	AIRS,AIRS_C	operon0026	operon0008							0.985598	-0.775499	-0.366852	0.160089	0.433153	NA	FALSE	-1.29036	-1.12259	-1.11486	3.02061e-07	0.000108124	1.32806e-11	TRUE	154.168
agat-gene-41	paeni_NIB01_000041	45066	45755	-	purQ	protein_coding		phosphoribosylformylglycinamidine synthase activity|0004642||IEA	'de novo' IMP biosynthetic process|0006189||IEA	GO:0006189, GO:0004642	phosphoribosylformylglycinamidine synthase subunit PurQ		Part of the phosphoribosylformylglycinamidine synthase complex involved in the purines biosynthetic pathway. Catalyzes the ATP-dependent conversion of formylglycinamide ribonucleotide (FGAR) and glutamine to yield formylglycinamidine ribonucleotide (FGAM) and glutamate. The FGAM synthase complex is composed of three subunits. PurQ produces an ammonia molecule by converting glutamine to glutamate.…	purQ	GO:0003674,GO:0003824,GO:0004642,GO:0005575,GO:0005622,GO:0005623,GO:0005737,GO:0005886,GO:0006139,GO:0006163,GO:0006164,GO:0006725,GO:0006753,GO:0006793,GO:0006796,GO:0006807,GO:0008150,GO:0008152,GO:0009058,GO:0009117,GO:0009150,GO:0009152,GO:0009165,GO:0009259,GO:0009260,GO:0009987,GO:0016020,GO:0016874,GO:0016879,GO:0016884,GO:0018130,GO:0019438,GO:0019637,GO:0019693,GO:0034641,GO:0034654,GO:…	6.3.5.3	ko:K01952	ko00230,ko01100,ko01110,ko01130,map00230,map01100,map01110,map01130	M00048	R04463	RC00010,RC01160	ko00000,ko00001,ko00002,ko01000	-	-	-	GATase_5	operon0026	operon0008							0.554825	-1.27464	-0.867321	0.567097	0.220731	NA	FALSE	-1.38691	-1.17001	-1.14786	2.10513e-06	0.00026959	8.77896e-09	TRUE	32.4114
agat-gene-42	paeni_NIB01_000042	45760	46005	-	purS	protein_coding					phosphoribosylformylglycinamidine synthase subunit PurS		Part of the phosphoribosylformylglycinamidine synthase complex involved in the purines biosynthetic pathway. Catalyzes the ATP-dependent conversion of formylglycinamide ribonucleotide (FGAR) and glutamine to yield formylglycinamidine ribonucleotide (FGAM) and glutamate. The FGAM synthase complex is composed of three subunits. PurQ produces an ammonia molecule by converting glutamine to glutamate.…	purS	-	6.3.2.6,6.3.5.3	ko:K01923,ko:K01952	ko00230,ko01100,ko01110,ko01130,map00230,map01100,map01110,map01130	M00048	R04463,R04591	RC00010,RC00064,RC00162,RC01160	ko00000,ko00001,ko00002,ko01000	-	-	iYO844.BSU06460	PurS	operon0026	operon0008							0.81724	-0.945614	-0.616525	0.432671	0.35728	NA	FALSE	-0.979598	-0.942876	-0.934326	4.79369e-06	0.000200284	2.43291e-09	FALSE	18.5192
agat-gene-46	paeni_NIB01_000046	50184	50669	-	purE	protein_coding	phosphoribosylaminoimidazole carboxylase complex|0009320||IEA	phosphoribosylaminoimidazole carboxylase activity|0004638||IEA	purine ribonucleotide biosynthetic process|0009152||IEA	GO:0009152, GO:0004638, GO:0009320	5-(carboxyamino)imidazole ribonucleotide mutase		Catalyzes the conversion of N5-carboxyaminoimidazole ribonucleotide (N5-CAIR) to 4-carboxy-5-aminoimidazole ribonucleotide (CAIR)	purE	GO:0003674,GO:0003824,GO:0004638,GO:0005488,GO:0005515,GO:0005575,GO:0005622,GO:0005623,GO:0005737,GO:0005829,GO:0006139,GO:0006163,GO:0006164,GO:0006725,GO:0006753,GO:0006793,GO:0006796,GO:0006807,GO:0008150,GO:0008152,GO:0009058,GO:0009117,GO:0009150,GO:0009152,GO:0009165,GO:0009259,GO:0009260,GO:0009987,GO:0016829,GO:0016830,GO:0016831,GO:0016853,GO:0016866,GO:0018130,GO:0019438,GO:0019637,GO:…	5.4.99.18	ko:K01588	ko00230,ko01100,ko01110,ko01130,map00230,map01100,map01110,map01130	M00048	R07405	RC01947	ko00000,ko00001,ko00002,ko01000	-	-	iETEC_1333.ETEC_0575,iJN746.PP_5336,iPC815.YPO3076,iUTI89_1310.UTI89_C0551	AIRC	operon0027	operon0009							0.634168	-1.39981	-0.782346	0.526777	0.206222	NA	FALSE	-0.863345	-0.683779	-0.674919	1.75509e-05	0.00166421	1.77045e-05	FALSE	33.4867
agat-gene-45	paeni_NIB01_000045	48985	50187	-	purK	protein_coding		phosphoribosylaminoimidazole carboxylase activity|0004638||IEA, ATP binding|0005524||IEA, metal ion binding|0046872||IEA	'de novo' IMP biosynthetic process|0006189||IEA	GO:0006189, GO:0004638, GO:0005524, GO:0046872	5-(carboxyamino)imidazole ribonucleotide synthase		Catalyzes the ATP-dependent conversion of 5- aminoimidazole ribonucleotide (AIR) and HCO(3)(-) to N5- carboxyaminoimidazole ribonucleotide (N5-CAIR)	purK	GO:0005575,GO:0005622,GO:0005623,GO:0005737,GO:0005829,GO:0044424,GO:0044444,GO:0044464	6.3.4.18	ko:K01589	ko00230,ko01100,ko01110,ko01130,map00230,map01100,map01110,map01130	M00048	R07404	RC01927	ko00000,ko00001,ko00002,ko01000	-	-	-	2-Hacid_dh_C,ATP-grasp	operon0027	operon0009							0.944328	-1.0176	-0.567225	0.252211	0.334542	NA	FALSE	-0.977288	-0.898656	-0.895454	2.9719e-06	0.00017968	7.46089e-10	FALSE	66.3414
agat-gene-44	paeni_NIB01_000044	47690	48988	-	purB	protein_coding		N6-(1,2-dicarboxyethyl)AMP AMP-lyase (fumarate-forming) activity|0004018||IEA	purine ribonucleotide biosynthetic process|0009152||IEA	GO:0009152, GO:0004018	adenylosuccinate lyase		Belongs to the lyase 1 family. Adenylosuccinate lyase subfamily	purB	GO:0003674,GO:0003824,GO:0004018,GO:0006139,GO:0006163,GO:0006164,GO:0006167,GO:0006725,GO:0006753,GO:0006793,GO:0006796,GO:0006807,GO:0008150,GO:0008152,GO:0009058,GO:0009117,GO:0009123,GO:0009124,GO:0009126,GO:0009127,GO:0009150,GO:0009152,GO:0009156,GO:0009161,GO:0009165,GO:0009167,GO:0009168,GO:0009259,GO:0009260,GO:0009987,GO:0016829,GO:0016840,GO:0016842,GO:0017144,GO:0018130,GO:0019438,GO:…	4.3.2.2	ko:K01756	ko00230,ko00250,ko01100,ko01110,ko01130,map00230,map00250,map01100,map01110,map01130	M00048,M00049	R01083,R04559	RC00379,RC00444,RC00445	ko00000,ko00001,ko00002,ko01000	-	-	iLJ478.TM1095,iSB619.SA_RS09895	ADSL_C,Lyase_1	operon0027	operon0009							0.883706	-0.944732	-0.618234	0.246777	0.347446	NA	FALSE	-0.965196	-0.914515	-0.915537	9.08876e-07	0.000107305	5.04062e-12	FALSE	88.1387
agat-gene-43	paeni_NIB01_000043	46560	47435	-		protein_coding		phosphoribosylaminoimidazolesuccinocarboxamide synthase activity|0004639||IEA	purine nucleotide biosynthetic process|0006164||IEA	GO:0006164, GO:0004639	phosphoribosylaminoimidazolesuccinocarboxamide synthase		Belongs to the SAICAR synthetase family	purC	GO:0003674,GO:0003824,GO:0004639,GO:0005575,GO:0005622,GO:0005623,GO:0005737,GO:0006139,GO:0006163,GO:0006164,GO:0006188,GO:0006189,GO:0006725,GO:0006753,GO:0006793,GO:0006796,GO:0006807,GO:0008150,GO:0008152,GO:0009058,GO:0009117,GO:0009123,GO:0009124,GO:0009126,GO:0009127,GO:0009150,GO:0009152,GO:0009156,GO:0009161,GO:0009165,GO:0009167,GO:0009168,GO:0009259,GO:0009260,GO:0009987,GO:0016874,GO:…	4.3.2.2,6.3.2.6,6.3.4.13	ko:K01756,ko:K01923,ko:K01945,ko:K03566	ko00230,ko00250,ko01100,ko01110,ko01130,ko02026,map00230,map00250,map01100,map01110,map01130,map02026	M00048,M00049	R01083,R04144,R04559,R04591	RC00064,RC00090,RC00162,RC00166,RC00379,RC00444,RC00445	ko00000,ko00001,ko00002,ko01000,ko03000	-	-	-	SAICAR_synt	operon0027								0.808933	-1.01794	-0.673572	0.309383	0.315623	NA	FALSE	-1.1855	-1.15867	-1.16631	6.43362e-08	1.65273e-05	3.06449e-21	TRUE	71.617
agat-gene-47	paeni_NIB01_000047	51237	51671	-		protein_coding					universal stress protein		Belongs to the universal stress protein A family	uspA	-	-	-	-	-	-	-	-	-	-	-	Usp	operon0028								2.81217	2.77986	2.75966	1.58593e-08	8.12247e-08	8.94712e-87	TRUE	-0.651309	-0.508191	-0.500029	0.000100251	0.0102965	0.00144304	FALSE	94.3829
agat-gene-48	paeni_NIB01_000048	51859	52122	-		protein_coding					DUF1294 domain-containing protein		membrane	ysdA	-	-	-	-	-	-	-	-	-	-	-	CSD,DUF1294	operon0029	operon0010							1.99247	1.95853	1.92576	1.47927e-06	6.34144e-06	2.87532e-21	TRUE	-0.416925	-0.144968	-0.138577	0.0397657	0.608556	0.556521	FALSE	75.2973
agat-gene-50	paeni_NIB01_000050	52448	54577	-		protein_coding					DNA topoisomerase III		Releases the supercoiling and torsional tension of DNA, which is introduced during the DNA replication and transcription, by transiently cleaving and rejoining one strand of the DNA duplex. Introduces a single-strand break via transesterification at a target site in duplex DNA. The scissile phosphodiester is attacked by the catalytic tyrosine of the enzyme, resulting in the formation of a DNA-(5'…	topB	-	5.99.1.2	ko:K03169	-	-	-	-	ko00000,ko01000,ko03032	-	-	-	Topoisom_bac,Toprim,zf-C4_Topoisom	operon0030	operon0010							-0.225872	-0.252557	-0.257759	0.0478112	0.0728343	0.0226113	FALSE	0.329955	0.297693	0.254962	0.00591513	0.0530138	0.0695979	FALSE	216.734
agat-gene-49	paeni_NIB01_000049	52252	52389	-		protein_coding					hypothetical protein		-	-	-	-	-	-	-	-	-	-	-	-	-	-	operon0030	operon0010							0.854666	0.845742	0.796871	0.000551684	0.000605936	2.19741e-08	FALSE	-0.603114	-0.67915	-0.511621	0.0458372	0.114723	0.0831456	FALSE	15.3096
agat-gene-51	paeni_NIB01_000051	54963	56897	+		protein_coding					amidase family protein		Catalyzes the hydrolysis of a monocarboxylic acid amid to form a monocarboxylate and ammonia	-	-	-	-	-	-	-	-	-	-	-	-	Amidase,SLH	operon0031								5.24952	4.97661	4.93604	3.14746e-08	3.35543e-07	2.18972e-65	TRUE	-0.0558215	-0.258598	-0.240005	0.761628	0.268133	0.262254	FALSE	21.7672
agat-gene-52	paeni_NIB01_000052	57132	58127	-		protein_coding					ketoacyl-ACP synthase III		Catalyzes the condensation reaction of fatty acid synthesis by the addition to an acyl acceptor of two carbons from malonyl-ACP. Catalyzes the first condensation reaction which initiates fatty acid synthesis and may therefore play a role in governing the total rate of fatty acid production. Possesses both acetoacetyl-ACP synthase and acetyl transacylase activities. Its substrate specificity deter…	fabH	GO:0003674,GO:0003824,GO:0006082,GO:0006629,GO:0006631,GO:0008150,GO:0008152,GO:0009987,GO:0016740,GO:0016746,GO:0016747,GO:0019752,GO:0032787,GO:0033818,GO:0043436,GO:0044237,GO:0044238,GO:0044255,GO:0044281,GO:0071704	2.3.1.180	ko:K00648	ko00061,ko01100,ko01212,map00061,map01100,map01212	M00082,M00083	R10707	RC00004,RC02729,RC02888	ko00000,ko00001,ko00002,ko01000,ko01004	-	-	-	ACP_syn_III,ACP_syn_III_C	operon0032								-1.32043	-1.16448	-1.09665	0.0051003	0.00387418	0.000268045	TRUE	-0.240698	-0.227491	-0.230078	0.120428	0.20566	0.191488	FALSE	110.732
agat-gene-53	paeni_NIB01_000053	58429	58983	+		protein_coding					NAD(P)H-dependent oxidoreductase		flavoprotein	azr	-	-	ko:K19784	-	-	-	-	ko00000	-	-	-	FMN_red	operon0033								2.10884	1.94237	1.86809	9.13191e-05	0.000329137	1.01051e-09	TRUE	0.48569	0.329077	0.230042	0.0671231	0.303598	0.385373	FALSE	1.95645
gene-paeni_NIB01_000054	paeni_NIB01_000054	59180	59296	-	rrf	rRNA																					operon0034	operon0011							#N/A	#N/A	#N/A	#N/A	#N/A	#N/A	#N/A	NA	NA	NA	NA	NA	NA	#VALUE!	NA
gene-paeni_NIB01_000055	paeni_NIB01_000055	59441	62367	-		rRNA																					operon0034	operon0011							#N/A	#N/A	#N/A	#N/A	#N/A	#N/A	#N/A	NA	NA	NA	NA	NA	NA	#VALUE!	NA
gene-paeni_NIB01_000056	paeni_NIB01_000056	62721	64273	-		rRNA																					operon0034								#N/A	#N/A	#N/A	#N/A	#N/A	#N/A	#N/A	NA	NA	NA	NA	NA	NA	#VALUE!	NA
agat-gene-54	paeni_NIB01_000057	65027	65164	-		protein_coding					hypothetical protein		-	-	-	-	-	-	-	-	-	-	-	-	-	-	operon0035								1.78234	1.66005	1.57358	0.000640073	0.000447778	6.7268e-07	TRUE	NA	NA	NA	NA	NA	NA	#VALUE!	1.06442
agat-gene-55	paeni_NIB01_000058	65328	66704	-		protein_coding					NCS2 family permease		Permease	pbuO	-	-	ko:K06901	-	-	-	-	ko00000,ko02000	2.A.1.40	-	-	Xan_ur_permease	operon0036								1.96581	0.211552	0.127612	0.0368952	0.825053	NA	FALSE	-0.864627	-0.780499	-0.757772	3.87959e-05	0.00190641	2.83873e-05	FALSE	45.822
agat-gene-56	paeni_NIB01_000059	67382	67633	-		protein_coding					hypothetical protein																operon0037	operon0012							8.31987	8.23693	8.21722	3.0994e-09	1.33754e-08	6.27531e-264	TRUE	0.506075	0.539085	0.494941	0.00020283	0.00159278	2.56919e-05	FALSE	4.61339
agat-gene-57	paeni_NIB01_000060	67718	67906	-		protein_coding					hypothetical protein		Leucine-rich repeat (LRR) protein	-	-	-	-	-	-	-	-	-	-	-	-	LRR_4,LRR_5	operon0038	operon0012							-1.02996	-1.20065	NA	0.0370879	0.04352	NA	#VALUE!	NA	NA	NA	NA	NA	NA	#VALUE!	1.40372
agat-gene-58	paeni_NIB01_000061	67927	68469	-		protein_coding					hypothetical protein		Leucine-rich repeat (LRR) protein	-	-	-	-	-	-	-	-	-	-	-	-	LRR_4,LRR_5	operon0038	operon0012							-1.1831	-1.48265	-1.41759	0.00564013	0.00076017	6.59188e-05	TRUE	NA	NA	NA	NA	NA	NA	#VALUE!	4.74473
agat-gene-59	paeni_NIB01_000062	68647	70185	-	guaA	protein_coding		GMP synthase (glutamine-hydrolyzing) activity|0003922||IEA, ATP binding|0005524||IEA, pyrophosphatase activity|0016462||IEA	GMP biosynthetic process|0006177||IEA	GO:0006177, GO:0003922, GO:0005524, GO:0016462	glutamine-hydrolyzing GMP synthase		Catalyzes the synthesis of GMP from XMP	guaA	GO:0003674,GO:0003824,GO:0003921,GO:0003922,GO:0006139,GO:0006163,GO:0006164,GO:0006177,GO:0006725,GO:0006753,GO:0006793,GO:0006796,GO:0006807,GO:0008150,GO:0008152,GO:0009058,GO:0009116,GO:0009117,GO:0009119,GO:0009123,GO:0009124,GO:0009126,GO:0009127,GO:0009150,GO:0009152,GO:0009156,GO:0009161,GO:0009163,GO:0009165,GO:0009167,GO:0009168,GO:0009259,GO:0009260,GO:0009987,GO:0016874,GO:0016879,GO:…	2.3.1.128,6.3.5.2	ko:K01951,ko:K03790	ko00230,ko00983,ko01100,map00230,map00983,map01100	M00050	R01230,R01231,R08244	RC00010,RC00204	ko00000,ko00001,ko00002,ko01000,ko01002,ko03009	-	-	iLJ478.TM1820	GATase,GMP_synt_C,NAD_synthase	operon0039								-2.66938	-2.66437	-2.66796	3.84855e-08	1.12581e-07	2.39933e-87	TRUE	0.351338	0.31463	0.275061	0.00230015	0.0272266	0.0190383	FALSE	2449.56
agat-gene-60	paeni_NIB01_000063	70492	72855	-		protein_coding					DUF3488 and transglutaminase-like domain-containing protein		Transglutaminase/protease-like homologues	yebA	-	-	-	-	-	-	-	-	-	-	-	DUF4129,Transglut_core	operon0040	operon0013							0.479898	0.441149	0.42167	0.00121815	0.00537977	7.93026e-05	FALSE	0.215232	0.104807	0.0739458	0.0875773	0.490804	0.634757	FALSE	93.8302
agat-gene-61	paeni_NIB01_000064	72842	74209	-		protein_coding					DUF58 domain-containing protein		conserved protein (some members contain a von Willebrand factor type A (vWA) domain)	-	-	-	-	-	-	-	-	-	-	-	-	DUF58	operon0040	operon0013							-1.55053	-1.6572	-1.61086	0.0020983	0.00125651	9.69114e-08	TRUE	0.18643	-0.0914755	NA	0.626764	0.836616	NA	#VALUE!	13.1506
agat-gene-62	paeni_NIB01_000065	74206	75180	-		protein_coding					MoxR family ATPase		magnesium chelatase	yeaC	GO:0005575,GO:0005618,GO:0005623,GO:0030312,GO:0044464,GO:0071944	-	ko:K03924	-	-	-	-	ko00000,ko01000	-	-	-	AAA_3	operon0040	operon0013							-1.04978	-1.28653	NA	0.0299233	0.00866405	NA	#VALUE!	NA	NA	NA	NA	NA	NA	#VALUE!	4.97458
agat-gene-63	paeni_NIB01_000066	75299	76567	-		protein_coding					polysaccharide deacetylase		polysaccharide deacetylase	-	-	-	-	-	-	-	-	-	-	-	-	Cu_amine_oxidN1,Polysacc_deac_1	operon0041	operon0013							-0.797837	-0.970461	-0.932217	0.054778	0.0238095	0.00163067	FALSE	NA	NA	NA	NA	NA	NA	#VALUE!	5.72432
agat-gene-64	paeni_NIB01_000067	76813	77457	+		protein_coding					DedA family protein		SNARE associated Golgi protein	dedA1	-	-	-	-	-	-	-	-	-	-	-	Isochorismatase,SNARE_assoc	operon0042								-1.21432	-1.17922	-1.15088	0.00845774	0.000493754	3.87492e-07	TRUE	-0.147283	-0.142097	-0.150727	0.268684	0.413692	0.375482	FALSE	83.1422
agat-gene-65	paeni_NIB01_000068	77512	78822	-		protein_coding					MFS transporter		Transmembrane secretion effector	-	-	-	-	-	-	-	-	-	-	-	-	MFS_1,MFS_3	operon0043								0.0872017	0.2863	NA	0.863746	0.485365	NA	#VALUE!	NA	NA	NA	NA	NA	NA	#VALUE!	3.24251
agat-gene-69	paeni_NIB01_000072	81995	83101	+		protein_coding	integral component of membrane|0016021||IEA		spore germination|0009847||IEA	GO:0009847, GO:0016021	endospore germination permease		Spore gernimation protein	-	-	-	ko:K06296	-	-	-	-	ko00000,ko02000	2.A.3.9.3	-	-	Spore_permease	operon0044	operon0014							0.592675	0.463516	0.425502	0.089418	0.153388	0.119435	FALSE	NA	NA	NA	NA	NA	NA	#VALUE!	2.59127
agat-gene-70	paeni_NIB01_000073	83145	84272	+		protein_coding	integral component of membrane|0016021||IEA		spore germination|0009847||IEA	GO:0009847, GO:0016021	endospore germination permease		Spore gernimation protein	-	-	-	ko:K06296	-	-	-	-	ko00000,ko02000	2.A.3.9.3	-	-	Spore_permease	operon0044	operon0014							-1.50764	-0.984927	NA	0.0895789	0.194566	NA	#VALUE!	NA	NA	NA	NA	NA	NA	#VALUE!	2.77186
agat-gene-67	paeni_NIB01_000070	80529	81731	+		protein_coding					Ger(x)C family spore germination protein		PFAM spore germination B3 GerAC family protein	gerAC1	-	-	ko:K06297	-	-	-	-	ko00000	-	-	-	Spore_GerAC	operon0044	operon0014							0.880214	0.763246	0.634902	0.107765	0.136355	0.0997112	FALSE	NA	NA	NA	NA	NA	NA	#VALUE!	1.45571
agat-gene-68	paeni_NIB01_000071	81737	81973	+		protein_coding					hypothetical protein		-	M1-960	-	-	-	-	-	-	-	-	-	-	-	-	operon0044	operon0014							1.17885	1.00092	NA	0.0376064	0.145957	NA	#VALUE!	NA	NA	NA	NA	NA	NA	#VALUE!	0.238057
agat-gene-66	paeni_NIB01_000069	78999	80510	+		protein_coding					spore germination protein		Spore germination protein	gerKA	-	-	ko:K06295	-	-	-	-	ko00000	-	-	-	GerA	operon0044	operon0014							1.31775	1.41677	1.36292	0.00270395	0.00133443	2.76505e-07	TRUE	NA	NA	NA	NA	NA	NA	#VALUE!	1.5077
agat-gene-74	paeni_NIB01_000077	86462	87508	-		protein_coding					ABC transporter ATP-binding protein		ABC transporter, ATP-binding protein	drrA1	-	-	ko:K01990	-	M00254	-	-	ko00000,ko00002,ko02000	3.A.1	-	-	ABC_tran	operon0045	operon0015							-2.76959	-2.82237	-2.83032	3.29459e-07	9.52374e-08	6.67408e-79	TRUE	0.193391	0.167315	0.123449	0.228519	0.346565	0.519176	FALSE	158.111
agat-gene-73	paeni_NIB01_000076	85666	86460	-		protein_coding					ABC-2 family transporter protein		ABC transporter permease	M1-956	-	-	ko:K01992	-	M00254	-	-	ko00000,ko00002,ko02000	3.A.1	-	-	ABC2_membrane_6	operon0045	operon0015							-3.20867	-3.27531	-3.29798	9.87234e-07	3.36101e-07	3.284e-62	TRUE	-0.035791	-0.0903645	-0.0993794	0.852678	0.662587	0.639212	FALSE	109.063
agat-gene-72	paeni_NIB01_000075	84876	85652	-		protein_coding					ABC-2 family transporter protein		ABC transporter permease	M1-957	-	-	ko:K01992	-	M00254	-	-	ko00000,ko00002,ko02000	3.A.1	-	-	ABC2_membrane_6	operon0045	operon0015							-3.4349	-3.49122	-3.48312	4.79466e-07	5.22617e-08	1.41209e-81	TRUE	0.13858	0.0660637	0.0332817	0.494158	0.777749	0.890279	FALSE	111.969
agat-gene-71	paeni_NIB01_000074	84367	84831	-	bcp	protein_coding		antioxidant activity|0016209||IEA, oxidoreductase activity|0016491||IEA		GO:0016209, GO:0016491	thioredoxin-dependent thiol peroxidase		Peroxiredoxin	bcp	GO:0003674,GO:0003824,GO:0004601,GO:0005575,GO:0005622,GO:0005623,GO:0005634,GO:0006950,GO:0006979,GO:0008150,GO:0008152,GO:0008379,GO:0009636,GO:0009987,GO:0016209,GO:0016491,GO:0016684,GO:0019725,GO:0033554,GO:0034599,GO:0042221,GO:0042592,GO:0043226,GO:0043227,GO:0043229,GO:0043231,GO:0044424,GO:0044464,GO:0045454,GO:0050789,GO:0050794,GO:0050896,GO:0051716,GO:0051920,GO:0055114,GO:0065007,GO:…	1.11.1.15	ko:K03564	-	-	-	-	ko00000,ko01000	-	-	-	AhpC-TSA	operon0045	operon0015							-1.38504	-1.31604	-1.29663	8.25411e-05	0.000220432	6.88194e-09	TRUE	-0.148582	-0.234118	-0.235144	0.33916	0.169779	0.166814	FALSE	99.1933
agat-gene-75	paeni_NIB01_000078	87713	88756	+		protein_coding					LCP family protein		Transcriptional regulator	lytR1	-	-	-	-	-	-	-	-	-	-	-	LytR_cpsA_psr,SH3_3	operon0046	operon0016							0.59063	0.565639	0.5489	0.00030899	0.00185415	1.25453e-05	FALSE	0.644919	0.647152	0.595705	2.97079e-05	0.000777147	5.37047e-06	FALSE	199.881
agat-gene-76	paeni_NIB01_000079	88837	90156	+		protein_coding		pyridoxal phosphate binding|0030170||IEA, glutamate-1-semialdehyde 2,1-aminomutase activity|0042286||IEA	tetrapyrrole biosynthetic process|0033014||IEA	GO:0033014, GO:0030170, GO:0042286	glutamate-1-semialdehyde 2,1-aminomutase		Converts (S)-4-amino-5-oxopentanoate to 5-aminolevulinate during the porphyrin biosynthesis pathway	gsaB	-	5.4.3.8	ko:K01845	ko00860,ko01100,ko01110,ko01120,map00860,map01100,map01110,map01120	M00121	R02272	RC00677	ko00000,ko00001,ko00002,ko01000,ko01007	-	-	iYO844.BSU08710	Aminotran_3	operon0047	operon0016							-1.77218	-1.83928	-1.84432	2.46076e-06	3.29845e-06	2.11846e-30	TRUE	-0.00116574	-0.0785462	-0.0965634	0.993015	0.607961	0.534872	FALSE	135.868
agat-gene-77	paeni_NIB01_000080	90240	91634	-		protein_coding					PLP-dependent aminotransferase family protein		Transcriptional regulators containing a DNA-binding HTH domain and an aminotransferase domain (MocR family) and their eukaryotic orthologs	ycxD	-	-	-	-	-	-	-	-	-	-	-	Aminotran_1_2,GntR	operon0048								-0.841204	-0.915918	-0.905025	0.00271828	0.00175279	1.24303e-06	FALSE	0.389749	0.282495	0.224318	0.0392156	0.166563	0.253165	FALSE	40.9705
agat-gene-78	paeni_NIB01_000081	91768	92703	+		protein_coding					DMT family transporter		Permeases of the drug metabolite transporter (DMT) superfamily	ycxC	-	-	-	-	-	-	-	-	-	-	-	EamA	operon0049								-0.22775	-0.31841	-0.330665	0.51438	0.289299	0.242839	FALSE	-0.679125	-0.782222	-0.688663	0.0213862	0.0145439	0.0103307	FALSE	4.7502
agat-gene-79	paeni_NIB01_000082	93417	94409	+	trpS	protein_coding	cytoplasm|0005737||IEA	tryptophan-tRNA ligase activity|0004830||IEA	tryptophanyl-tRNA aminoacylation|0006436||IEA	GO:0006436, GO:0004830, GO:0005737	tryptophan--tRNA ligase		Catalyzes a two-step reaction, first charging a tryptophan molecule by linking its carboxyl group to the alpha-phosphate of ATP, followed by transfer of the aminoacyl-adenylate to its tRNA	trpS	GO:0003674,GO:0003824,GO:0004812,GO:0004830,GO:0005575,GO:0005622,GO:0005623,GO:0005737,GO:0006082,GO:0006139,GO:0006399,GO:0006412,GO:0006418,GO:0006436,GO:0006518,GO:0006520,GO:0006725,GO:0006807,GO:0008150,GO:0008152,GO:0009058,GO:0009059,GO:0009987,GO:0010467,GO:0016070,GO:0016874,GO:0016875,GO:0019538,GO:0019752,GO:0034641,GO:0034645,GO:0034660,GO:0043038,GO:0043039,GO:0043043,GO:0043170,GO:…	6.1.1.2	ko:K01867	ko00970,map00970	M00359,M00360	R03664	RC00055,RC00523	ko00000,ko00001,ko00002,ko01000,ko01007,ko03016	-	-	-	tRNA-synt_1b	operon0050	operon0017							-0.488673	-0.460375	-0.470891	0.0544934	0.0702678	0.0287138	FALSE	0.385465	0.431801	0.344993	0.101858	0.0927129	0.120607	FALSE	21.458
agat-gene-80	paeni_NIB01_000083	94479	95585	+		protein_coding	integral component of membrane|0016021||IEA		spore germination|0009847||IEA	GO:0009847, GO:0016021	endospore germination permease		Spore germination protein	-	-	-	-	-	-	-	-	-	-	-	-	Spore_permease	operon0051	operon0017							-1.54785	-1.55091	NA	0.00908369	0.00360032	NA	#VALUE!	NA	NA	NA	NA	NA	NA	#VALUE!	9.48673
agat-gene-82	paeni_NIB01_000085	97032	98189	+		protein_coding			spore germination|0009847||IEA, asexual sporulation|0030436||IEA	GO:0009847, GO:0030436	Ger(x)C family spore germination protein		TIGRFAM germination protein, Ger(x)C family	-	-	-	-	-	-	-	-	-	-	-	-	Spore_GerAC	operon0051	operon0017							0.019823	-0.127721	-0.124894	0.961897	0.712324	0.711501	FALSE	NA	NA	NA	NA	NA	NA	#VALUE!	2.52833
agat-gene-81	paeni_NIB01_000084	95566	97035	+		protein_coding					spore germination protein		Spore germination protein	-	-	-	-	-	-	-	-	-	-	-	-	GerA	operon0051	operon0017							-0.797089	-0.947841	NA	0.0857557	0.0192999	NA	#VALUE!	NA	NA	NA	NA	NA	NA	#VALUE!	3.02087
agat-gene-83	paeni_NIB01_000086	98267	98662	-		protein_coding					sensory rhodopsin transducer		Anabaena sensory rhodopsin transducer	M1-951	-	-	-	-	-	-	-	-	-	-	-	ASRT	operon0052								-0.203729	0.0145295	0.00321632	0.588032	0.963104	0.992508	FALSE	0.309922	0.383611	0.273107	0.215695	0.15505	0.292352	FALSE	5.74621
agat-gene-85	paeni_NIB01_000088	101161	102000	-		protein_coding					carbohydrate ABC transporter permease		ABC transporter permease	yesQ	-	-	ko:K02026	-	M00207	-	-	ko00000,ko00002,ko02000	3.A.1.1	-	iYO844.BSU06990	BPD_transp_1	operon0053	operon0018							-0.508162	-0.411976	-0.3918	0.299254	0.204869	0.198601	FALSE	0.0167876	-0.141573	NA	0.96365	0.723916	NA	#VALUE!	8.12679
agat-gene-88	paeni_NIB01_000091	104552	106105	-		protein_coding			phosphorelay signal transduction system|0000160||IEA	GO:0000160	response regulator		Response regulator containing CheY-like receiver domain and AraC-type DNA-binding domain	yesN	-	-	ko:K07720	ko02020,map02020	M00519	-	-	ko00000,ko00001,ko00002,ko02022	-	-	-	HTH_18,Response_reg,TniQ	operon0053	operon0019							3.54469	3.5967	3.5806	1.90284e-08	4.29328e-08	4.43529e-160	TRUE	NA	NA	NA	NA	NA	NA	#VALUE!	4.17285
agat-gene-84	paeni_NIB01_000087	99862	101103	-		protein_coding					rhamnogalacturonan acetylesterase		GDSL-like Lipase/Acylhydrolase family	rhgT_4	-	-	-	-	-	-	-	-	-	-	-	Lipase_GDSL_2	operon0053	operon0018							-0.726181	-0.561975	-0.534121	0.0789431	0.0726742	0.0512194	FALSE	0.0662223	-0.030353	-0.04648	0.776204	0.904182	0.851612	FALSE	16.2153
agat-gene-89	paeni_NIB01_000092	106080	107867	-		protein_coding					sensor histidine kinase		Histidine kinase	-	-	2.7.13.3	ko:K07718	ko02020,map02020	M00519	-	-	ko00000,ko00001,ko00002,ko01000,ko01001,ko02022	-	-	-	HAMP,HATPase_c,His_kinase,dCache_1	operon0053	operon0019							2.65032	2.75392	2.70012	8.5284e-06	7.10806e-06	9.14708e-24	TRUE	0.535448	0.23487	0.137245	0.173131	0.631768	0.649413	FALSE	7.64246
agat-gene-86	paeni_NIB01_000089	102003	102905	-		protein_coding					sugar ABC transporter permease		ABC transporter permease	yesP	GO:0005575,GO:0005623,GO:0005886,GO:0005887,GO:0016020,GO:0016021,GO:0031224,GO:0031226,GO:0044425,GO:0044459,GO:0044464,GO:0071944	-	ko:K02025,ko:K15771	ko02010,map02010	M00207,M00491	-	-	ko00000,ko00001,ko00002,ko02000	3.A.1.1,3.A.1.1.16,3.A.1.1.2	-	-	BPD_transp_1	operon0053	operon0018							3.03836	2.91803	2.86223	5.02189e-06	5.12794e-06	1.15513e-26	TRUE	NA	NA	NA	NA	NA	NA	#VALUE!	0.697755
agat-gene-87	paeni_NIB01_000090	103047	104330	-		protein_coding					sugar ABC transporter substrate-binding protein		ABC-type sugar transport system, periplasmic component	-	-	-	ko:K02027	-	M00207	-	-	ko00000,ko00002,ko02000	3.A.1.1	-	-	SBP_bac_1,SBP_bac_8	operon0053								4.80038	4.76139	4.72494	1.61159e-07	2.37355e-07	1.24786e-75	TRUE	NA	NA	NA	NA	NA	NA	#VALUE!	0.618402
agat-gene-90	paeni_NIB01_000093	108126	109442	-		protein_coding					GDSL-type esterase/lipase family protein		copper amine oxidase	ypmR	-	-	-	-	-	-	-	-	-	-	-	Cu_amine_oxidN1,Lipase_GDSL_2	operon0054								1.01076	0.990495	0.969133	1.33134e-05	4.02437e-05	5.96084e-18	FALSE	0.534242	0.594921	0.54525	0.000118471	0.00140222	2.77929e-05	FALSE	142.96
agat-gene-91	paeni_NIB01_000094	109650	109940	-		protein_coding					hypothetical protein		-	M1-943	-	-	-	-	-	-	-	-	-	-	-	-	operon0055								0.68949	0.673969	0.655779	6.38583e-05	0.00040201	4.43372e-08	FALSE	0.30422	0.238559	0.201021	0.0105232	0.0858567	0.11723	FALSE	191.103
agat-gene-92	paeni_NIB01_000095	110176	111048	-		protein_coding					inositol monophosphatase		Belongs to the inositol monophosphatase superfamily	suhB	-	3.1.3.25	ko:K01092	ko00521,ko00562,ko01100,ko04070,map00521,map00562,map01100,map04070	M00131	R01185,R01186,R01187	RC00078	ko00000,ko00001,ko00002,ko01000	-	-	-	Inositol_P	operon0056								0.629168	0.597291	0.582016	0.000640742	0.00396016	0.000585233	FALSE	0.53253	0.535699	0.495488	6.88243e-05	0.00111091	1.77076e-06	FALSE	324.33
agat-gene-93	paeni_NIB01_000096	111147	112148	-	uvsE	protein_coding		nuclease activity|0004518||IEA	DNA repair|0006281||IEA, UV protection|0009650||IEA	GO:0006281, GO:0009650, GO:0004518	UV DNA damage repair endonuclease UvsE		uV damage repair endonuclease	uvsE	-	-	ko:K13281	-	-	-	-	ko00000,ko01000	-	-	-	UvdE	operon0057								-1.38567	-1.35422	-1.35724	1.11351e-06	2.87997e-06	1.21638e-30	TRUE	0.0879399	0.296562	0.235155	0.578936	0.159965	0.221218	FALSE	263.193
agat-gene-95	paeni_NIB01_000098	112658	113758	-		protein_coding		ATP binding|0005524||IEA, D-alanine-D-alanine ligase activity|0008716||IEA, metal ion binding|0046872||IEA		GO:0005524, GO:0008716, GO:0046872	D-alanine--D-alanine ligase		Belongs to the D-alanine--D-alanine ligase family	ddl	-	6.3.2.4	ko:K01921	ko00473,ko00550,ko01100,ko01502,map00473,map00550,map01100,map01502	-	R01150	RC00064,RC00141	ko00000,ko00001,ko01000,ko01011	-	-	-	Dala_Dala_lig_C,Dala_Dala_lig_N	operon0058	operon0020							-1.44223	-1.47756	-1.47967	7.33179e-07	1.08535e-06	4.46127e-60	TRUE	0.223707	0.322685	0.267516	0.0902625	0.0855976	0.117598	FALSE	304.785
agat-gene-94	paeni_NIB01_000097	112303	112626	-		protein_coding					hypothetical protein		-	M1-940	-	-	-	-	-	-	-	-	-	-	-	-	operon0058	operon0020							-1.012	-0.997936	-1.01112	1.22768e-05	1.38815e-05	5.02744e-27	FALSE	0.493402	0.517419	0.441806	0.00290273	0.0203642	0.0184713	FALSE	104.286
agat-gene-96	paeni_NIB01_000099	113897	114943	-		protein_coding					amidase domain-containing protein		Putative amidase domain	yhbB	-	-	-	-	-	-	-	-	-	-	-	Amidase_6	operon0059								-0.94513	-1.01703	-1.01297	0.000319029	0.00017507	4.36245e-12	FALSE	0.221298	0.243795	0.176201	0.338488	0.354254	0.45088	FALSE	82.7783
agat-gene-97	paeni_NIB01_000100	115275	117989	+	acnA	protein_coding		aconitate hydratase activity|0003994||IEA	tricarboxylic acid cycle|0006099||IEA	GO:0006099, GO:0003994	aconitate hydratase AcnA		Catalyzes the isomerization of citrate to isocitrate via cis-aconitate	acnA	GO:0003674,GO:0003676,GO:0003723,GO:0003729,GO:0003730,GO:0003824,GO:0003994,GO:0005488,GO:0006082,GO:0006091,GO:0006099,GO:0006101,GO:0006629,GO:0006631,GO:0008150,GO:0008152,GO:0009060,GO:0009987,GO:0015980,GO:0016829,GO:0016835,GO:0016836,GO:0016999,GO:0017144,GO:0019541,GO:0019679,GO:0019752,GO:0032787,GO:0043436,GO:0044237,GO:0044238,GO:0044255,GO:0044281,GO:0045333,GO:0046459,GO:0047456,GO:…	4.2.1.3	ko:K01681	ko00020,ko00630,ko00720,ko01100,ko01110,ko01120,ko01130,ko01200,ko01210,ko01230,map00020,map00630,map00720,map01100,map01110,map01120,map01130,map01200,map01210,map01230	M00009,M00010,M00012,M00173,M00740	R01324,R01325,R01900	RC00497,RC00498,RC00618	br01601,ko00000,ko00001,ko00002,ko01000	-	-	-	Aconitase,Aconitase_C	operon0060								-1.3227	-1.40606	-1.40152	4.0551e-06	7.57721e-06	1.01864e-21	TRUE	-0.211978	-0.346746	-0.337109	0.122271	0.0750962	0.0577843	FALSE	2593.09
agat-gene-99	paeni_NIB01_000102	118751	119617	-		protein_coding					M15 family metallopeptidase		D-alanyl-D-alanine carboxypeptidase	vanY	-	3.4.17.14	ko:K07260	ko00550,ko01100,ko01502,ko02020,map00550,map01100,map01502,map02020	M00651	-	-	ko00000,ko00001,ko00002,ko01000,ko01002,ko01011,ko01504	-	-	-	VanY	operon0061	operon0021							-0.40528	-0.398072	-0.410148	0.1113	0.103923	0.0598867	FALSE	NA	NA	NA	NA	NA	NA	#VALUE!	13.2218
agat-gene-98	paeni_NIB01_000101	118171	118722	-		protein_coding					VanZ family protein		VanZ like family	-	-	-	-	-	-	-	-	-	-	-	-	VanZ	operon0061	operon0021							-0.147279	-0.0941966	-0.121143	0.518357	0.67761	0.555735	FALSE	NA	NA	NA	NA	NA	NA	#VALUE!	11.4049
agat-gene-100	paeni_NIB01_000103	119716	120804	-		protein_coding					HAMP domain-containing histidine kinase		Histidine kinase	-	-	-	-	-	-	-	-	-	-	-	-	HAMP,HATPase_c,HisKA	operon0062	operon0021							-0.801333	-0.78622	-0.773068	0.000628675	0.000530963	9.10418e-09	FALSE	0.575122	0.793955	0.668139	0.00947394	0.0129572	0.00639214	FALSE	32.2773
agat-gene-101	paeni_NIB01_000104	120797	121492	-		protein_coding					response regulator transcription factor		COG0745 Response regulators consisting of a CheY-like receiver domain and a winged-helix DNA-binding domain	-	-	-	-	-	-	-	-	-	-	-	-	Response_reg,Trans_reg_C	operon0062	operon0021							-0.0809953	-0.0701829	-0.0860596	0.599048	0.652222	0.548613	FALSE	0.933046	0.885172	0.78697	0.000292184	0.00165115	0.000423351	FALSE	16.1168
agat-gene-103	paeni_NIB01_000106	122596	123417	+		protein_coding					effector binding domain-containing protein		Bacterial transcription activator, effector binding domain	yobU	-	-	ko:K13653	-	-	-	-	ko00000,ko03000	-	-	-	Cass2,GyrI-like,HTH_18,Zn_ribbon_2	operon0063	operon0022							0.512746	0.418553	0.395735	0.0234128	0.0465912	0.0195357	FALSE	-0.0863392	0.135798	0.0795473	0.807686	0.726396	0.788079	FALSE	14.4805
agat-gene-102	paeni_NIB01_000105	121576	122526	+		protein_coding					YafY family transcriptional regulator		Transcriptional regulator	yobV7	-	-	-	-	-	-	-	-	-	-	-	HTH_11,WYL	operon0063	operon0022							-0.164539	-0.212351	-0.239286	0.358097	0.229773	0.16751	FALSE	0.260523	0.331436	0.246151	0.26932	0.176194	0.301584	FALSE	10.9671
agat-gene-104	paeni_NIB01_000107	123962	124129	+		protein_coding					hypothetical protein		-	-	-	-	-	-	-	-	-	-	-	-	-	-	operon0064								6.34258	6.33303	6.28674	6.54128e-08	2.19232e-07	1.05796e-89	TRUE	NA	NA	NA	NA	NA	NA	#VALUE!	0.971384
agat-gene-105	paeni_NIB01_000108	124334	125026	+		protein_coding					aspartate/glutamate racemase family protein		-	M1-494	-	-	-	-	-	-	-	-	-	-	-	-	operon0065								1.10488	1.15424	1.12784	0.000155143	0.000191423	8.24939e-11	TRUE	0.990312	0.98716	0.896898	0.000106777	0.000866728	2.81976e-05	FALSE	12.5568
agat-gene-106	paeni_NIB01_000109	125495	127282	-	thiC	protein_coding		iron-sulfur cluster binding|0051536||IEA	thiamine biosynthetic process|0009228||IEA	GO:0009228, GO:0051536	phosphomethylpyrimidine synthase ThiC		Catalyzes the synthesis of the hydroxymethylpyrimidine phosphate (HMP-P) moiety of thiamine from aminoimidazole ribotide (AIR) in a radical S-adenosyl-L-methionine (SAM)-dependent reaction	thiC	GO:0003674,GO:0003824,GO:0005575,GO:0005622,GO:0005623,GO:0005737,GO:0005829,GO:0005886,GO:0006725,GO:0006766,GO:0006767,GO:0006772,GO:0006790,GO:0006807,GO:0008150,GO:0008152,GO:0009058,GO:0009110,GO:0009228,GO:0009987,GO:0016020,GO:0017144,GO:0018130,GO:0019438,GO:0034641,GO:0040007,GO:0042364,GO:0042723,GO:0042724,GO:0044237,GO:0044249,GO:0044271,GO:0044272,GO:0044281,GO:0044283,GO:0044424,GO:…	4.1.99.17,4.1.99.23	ko:K03147,ko:K22465	ko00730,ko01100,map00730,map01100	M00127	R03472	RC03251,RC03252	ko00000,ko00001,ko00002,ko01000	-	-	iYO844.BSU08790	ThiC-associated,ThiC_Rad_SAM	operon0066								1.7483	1.7709	1.72988	1.33151e-05	3.50459e-05	4.53966e-17	TRUE	0.464714	0.484631	0.410577	0.0106615	0.0170476	0.0324711	FALSE	17.3672
agat-gene-107	paeni_NIB01_000110	127873	128616	-		protein_coding					IclR family transcriptional regulator		Transcriptional regulator	kdgR1	-	-	-	-	-	-	-	-	-	-	-	HTH_IclR,IclR	operon0067								-2.42313	-2.39767	-2.37882	8.78392e-07	1.01287e-06	4.23401e-62	TRUE	0.427889	0.430912	0.370497	0.0106555	0.0220528	0.0268829	FALSE	98.9908
agat-gene-108	paeni_NIB01_000111	128975	130003	+		protein_coding					alpha/beta hydrolase		Alpha beta	yfhR1	-	-	-	-	-	-	-	-	-	-	-	Abhydrolase_1,Abhydrolase_6,Hydrolase_4	operon0068								1.11718	1.17069	1.14314	0.00054844	0.000115054	2.98782e-10	TRUE	-0.0656751	-0.0761987	-0.0892987	0.594932	0.685354	0.6259	FALSE	64.1743
agat-gene-109	paeni_NIB01_000112	130206	131531	+		protein_coding					DUF2935 domain-containing protein		Superoxide dismutase	sodA	GO:0000302,GO:0000303,GO:0000305,GO:0003674,GO:0003824,GO:0004784,GO:0005488,GO:0005506,GO:0005575,GO:0005576,GO:0005622,GO:0005623,GO:0005737,GO:0005829,GO:0005886,GO:0006801,GO:0006950,GO:0006979,GO:0008150,GO:0008152,GO:0009405,GO:0009605,GO:0009607,GO:0009636,GO:0009987,GO:0010035,GO:0016020,GO:0016209,GO:0016491,GO:0016721,GO:0019430,GO:0020012,GO:0030682,GO:0033554,GO:0034599,GO:0034614,GO:…	1.15.1.1	ko:K04564	ko04013,ko04068,ko04146,ko04211,ko04212,ko04213,ko05016,map04013,map04068,map04146,map04211,map04212,map04213,map05016	-	-	-	ko00000,ko00001,ko01000	-	-	iNJ661.Rv3846	Sod_Fe_C,Sod_Fe_N	operon0069								0.00596174	-0.0423404	-0.056168	0.990933	0.927	0.876525	FALSE	NA	NA	NA	NA	NA	NA	#VALUE!	2.08779
agat-gene-110	paeni_NIB01_000113	131667	135308	-		protein_coding					S-layer homology domain-containing protein		S-layer homology domain	-	-	-	-	-	-	-	-	-	-	-	-	Alpha-amylase,Bac_rhamnosid,Bac_rhamnosid6H,Bac_rhamnosid_C,Bac_rhamnosid_N,Big_2,Laminin_G_3,SLH,fn3	operon0070								0.00639413	-0.041358	-0.0711113	0.975901	0.859683	0.734438	FALSE	0.503066	0.528402	0.443351	0.0114065	0.0224396	0.0304277	FALSE	13.3148
agat-gene-111	paeni_NIB01_000114	135579	135803	-		protein_coding					hypothetical protein		-	-	-	-	-	-	-	-	-	-	-	-	-	-	operon0071	operon0023							-0.354758	-0.442119	-0.445422	0.0378418	0.0131585	0.00285281	FALSE	-0.346252	-0.468389	-0.450412	0.0385591	0.0225483	0.0143323	FALSE	127.259
agat-gene-112	paeni_NIB01_000115	135874	136728	-		protein_coding					lipoate--protein ligase family protein		lipoate-protein ligase A	lipL	GO:0003674,GO:0003824,GO:0006082,GO:0006464,GO:0006629,GO:0006631,GO:0006633,GO:0006732,GO:0006790,GO:0006807,GO:0008150,GO:0008152,GO:0008610,GO:0009058,GO:0009106,GO:0009107,GO:0009108,GO:0009249,GO:0009987,GO:0010467,GO:0016053,GO:0016415,GO:0016740,GO:0016746,GO:0016747,GO:0018065,GO:0018130,GO:0018193,GO:0018205,GO:0019538,GO:0019752,GO:0032787,GO:0036211,GO:0043170,GO:0043412,GO:0043436,GO:…	2.3.1.200,2.3.1.204	ko:K16869,ko:K18821	-	-	-	-	ko00000,ko01000	-	-	-	BPL_LplA_LipB	operon0072	operon0023							-2.65551	-2.77702	-2.75784	1.50911e-05	5.88752e-06	4.21533e-28	TRUE	-0.201872	-0.306892	-0.263105	0.407237	0.286483	0.287368	FALSE	81.5087
agat-gene-113	paeni_NIB01_000116	136994	137587	-	folE	protein_coding		GTP cyclohydrolase I activity|0003934||IEA	pteridine-containing compound biosynthetic process|0042559||IEA, tetrahydrofolate biosynthetic process|0046654||IEA	GO:0042559, GO:0046654, GO:0003934	GTP cyclohydrolase I FolE		GTP cyclohydrolase	folE	GO:0000166,GO:0001882,GO:0001883,GO:0003674,GO:0003824,GO:0003933,GO:0003934,GO:0005488,GO:0005525,GO:0005575,GO:0005622,GO:0005623,GO:0005737,GO:0006066,GO:0006725,GO:0006729,GO:0006732,GO:0006807,GO:0008150,GO:0008152,GO:0008270,GO:0009058,GO:0009108,GO:0009987,GO:0016787,GO:0016810,GO:0016814,GO:0017076,GO:0017144,GO:0018130,GO:0019001,GO:0019238,GO:0019438,GO:0019751,GO:0032549,GO:0032550,GO:…	3.5.4.16	ko:K01495	ko00790,ko01100,map00790,map01100	M00126,M00841,M00842,M00843	R00428,R04639,R05046,R05048	RC00263,RC00294,RC00323,RC00945,RC01188	ko00000,ko00001,ko00002,ko01000	-	-	iIT341.HP0928,iNJ661.Rv3609c	GTP_cyclohydroI	operon0073	operon0024							-1.36035	-1.37852	-1.37226	7.58944e-07	3.0725e-06	2.53961e-29	TRUE	0.233115	0.273299	0.229506	0.0453417	0.0868998	0.117984	FALSE	546.966
agat-gene-114	paeni_NIB01_000117	137667	137930	-		protein_coding					YneF family protein		Uncharacterised protein family (UPF0154)	yneF	-	-	ko:K09976	-	-	-	-	ko00000	-	-	-	UPF0154	operon0074	operon0024							-1.60542	-1.6411	-1.64209	1.07449e-06	1.57045e-06	1.93605e-40	TRUE	0.649894	0.652901	0.580108	0.00058019	0.00482869	0.00129161	FALSE	328.716
agat-gene-115	paeni_NIB01_000118	138155	139186	-		protein_coding					HD domain-containing protein		Histidine kinase	-	-	-	-	-	-	-	-	-	-	-	-	HD,HD_5	operon0075	operon0025							-1.12569	-1.08174	-1.09108	1.18324e-05	1.63576e-05	2.51047e-21	TRUE	-0.115658	-0.0965196	-0.112264	0.442212	0.569929	0.533409	FALSE	104.598
agat-gene-116	paeni_NIB01_000119	139202	141043	-	queG	protein_coding		4 iron, 4 sulfur cluster binding|0051539||IEA, epoxyqueuosine reductase activity|0052693||IEA	queuosine biosynthetic process|0008616||IEA	GO:0008616, GO:0051539, GO:0052693	tRNA epoxyqueuosine(34) reductase QueG		Involved in the cellular defense against the biological effects of O6-methylguanine (O6-MeG) and O4-methylthymine (O4-MeT) in DNA. Repairs the methylated nucleobase in DNA by stoichiometrically transferring the methyl group to a cysteine residue in the enzyme. This is a suicide reaction the enzyme is irreversibly inactivated	queG	GO:0003674,GO:0003824,GO:0006139,GO:0006725,GO:0006807,GO:0008150,GO:0008152,GO:0008616,GO:0009058,GO:0009116,GO:0009119,GO:0009163,GO:0009987,GO:0016491,GO:0018130,GO:0019438,GO:0034404,GO:0034641,GO:0034654,GO:0042455,GO:0044237,GO:0044238,GO:0044249,GO:0044271,GO:0044281,GO:0044283,GO:0046116,GO:0046483,GO:0052693,GO:0055086,GO:0055114,GO:0071704,GO:1901135,GO:1901137,GO:1901360,GO:1901362,GO:…	1.17.99.6,2.1.1.63	ko:K00567,ko:K18979	-	-	-	-	ko00000,ko01000,ko03016,ko03400	-	-	-	DNA_binding_1,DUF1730,Fer4_16,HEAT_2,Methyltransf_1N	operon0075	operon0025							-0.31801	-0.345652	-0.35806	0.0218361	0.0199431	0.00346264	FALSE	0.0233067	0.0702979	0.0405544	0.863591	0.653691	0.811301	FALSE	105.405
agat-gene-117	paeni_NIB01_000120	141222	141827	-	lepB	protein_coding		serine-type endopeptidase activity|0004252||IEA	signal peptide processing|0006465||IEA, protein secretion|0009306||IEA	GO:0006465, GO:0009306, GO:0004252	signal peptidase I		Signal peptidase I	lepB	GO:0005575,GO:0005623,GO:0005886,GO:0016020,GO:0044464,GO:0071944	3.4.21.89	ko:K03100	ko02024,ko03060,map02024,map03060	-	-	-	ko00000,ko00001,ko01000,ko01002	-	-	-	Peptidase_S24,Peptidase_S26	operon0076								0.5323	0.581446	0.555923	0.00150168	0.00152623	8.04514e-07	FALSE	1.59166	1.62107	1.5538	8.03034e-07	2.44194e-05	3.46281e-14	TRUE	32.2499
agat-gene-118	paeni_NIB01_000121	142250	142675	-		protein_coding					GNAT family N-acetyltransferase		GCN5 family acetyltransferase	ypeA	-	-	-	-	-	-	-	-	-	-	-	AAA,Acetyltransf_1	operon0077								-1.04608	-0.976294	-0.959974	3.29144e-05	0.000198686	5.07881e-10	FALSE	-0.159808	-0.100592	-0.117729	0.152692	0.522935	0.429229	FALSE	721.117
agat-gene-119	paeni_NIB01_000122	143211	143822	+		protein_coding					superoxide dismutase		Destroys radicals which are normally produced within the cells and which are toxic to biological systems	sodA	GO:0000302,GO:0000303,GO:0000305,GO:0003674,GO:0003676,GO:0003677,GO:0003824,GO:0004784,GO:0005488,GO:0005575,GO:0005622,GO:0005623,GO:0005737,GO:0005829,GO:0006801,GO:0006950,GO:0006979,GO:0008150,GO:0008152,GO:0009266,GO:0009268,GO:0009408,GO:0009628,GO:0009636,GO:0009987,GO:0010035,GO:0010038,GO:0010269,GO:0010447,GO:0016209,GO:0016491,GO:0016721,GO:0019430,GO:0030145,GO:0033554,GO:0034599,GO:…	1.15.1.1	ko:K04564	ko04013,ko04068,ko04146,ko04211,ko04212,ko04213,ko05016,map04013,map04068,map04146,map04211,map04212,map04213,map05016	-	-	-	ko00000,ko00001,ko01000	-	-	iE2348C_1286.E2348C_4213,iECSF_1327.ECSF_3769	Sod_Fe_C,Sod_Fe_N	operon0078								1.87769	1.66409	1.61459	9.84658e-05	0.000178877	8.38547e-09	TRUE	0.163512	0.15081	0.114769	0.154899	0.314303	0.444619	FALSE	188.065
agat-gene-120	paeni_NIB01_000123	144132	145496	-	mutY	protein_coding		uracil DNA N-glycosylase activity|0004844||IEA	DNA replication|0006260||IEA, DNA repair|0006281||IEA, DNA recombination|0006310||IEA	GO:0006260, GO:0006281, GO:0006310, GO:0004844	A/G-specific adenine glycosylase		Adenine glycosylase	mutY	-	-	ko:K03575	ko03410,map03410	-	-	-	ko00000,ko00001,ko01000,ko03400	-	-	-	EndIII_4Fe-2S,HhH-GPD,NUDIX_4	operon0079	operon0026							-1.93427	-1.96392	-1.9312	3.63956e-05	4.17302e-05	5.82056e-16	TRUE	-0.966627	-1.03294	-1.03686	2.64467e-06	3.46778e-05	1.59256e-15	FALSE	138.366
agat-gene-121	paeni_NIB01_000124	145554	145973	-	acpS	protein_coding		holo-[acyl-carrier-protein] synthase activity|0008897||IEA	lipid biosynthetic process|0008610||IEA	GO:0008610, GO:0008897	holo-ACP synthase		Transfers the 4'-phosphopantetheine moiety from coenzyme A to a Ser of acyl-carrier-protein	acpS	-	2.7.6.3,2.7.8.7,5.1.1.1	ko:K00950,ko:K00997,ko:K01775	ko00473,ko00770,ko00790,ko01100,ko01502,map00473,map00770,map00790,map01100,map01502	M00126,M00841	R00401,R01625,R03503	RC00002,RC00017,RC00285	ko00000,ko00001,ko00002,ko01000,ko01011	-	-	iHN637.CLJU_RS01470,iYO844.BSU04620	ACPS	operon0079	operon0026							-1.60026	-1.64592	-1.64918	1.33151e-05	1.29426e-06	1.87894e-29	TRUE	-0.548792	-0.521278	-0.455709	0.0431534	0.0990771	0.0721637	FALSE	55.3579
agat-gene-122	paeni_NIB01_000125	146160	146975	+		protein_coding					alpha/beta fold hydrolase		Lysophospholipase	luxD	-	3.2.1.4,4.2.99.18	ko:K01179,ko:K06889,ko:K10773,ko:K15853	ko00500,ko01100,ko02020,ko02024,ko03410,map00500,map01100,map02020,map02024,map03410	-	R06200,R11307,R11308	-	ko00000,ko00001,ko01000,ko03400	-	GH5,GH9	-	Abhydrolase_1,Acyl_transf_2,DLH,Hydrolase_4,Peptidase_S9	operon0080								-0.243355	-0.282152	-0.288075	0.29082	0.219367	0.124079	FALSE	0.242548	0.296093	0.217615	0.229931	0.259895	0.346357	FALSE	15.367
agat-gene-123	paeni_NIB01_000126	147075	147884	-	nadE	protein_coding		NAD+ synthase (glutamine-hydrolyzing) activity|0003952||IEA, glutaminase activity|0004359||IEA, NAD+ synthase activity|0008795||IEA	NAD biosynthetic process|0009435||IEA	GO:0009435, GO:0003952, GO:0004359, GO:0008795	ammonia-dependent NAD(+) synthetase		Catalyzes the ATP-dependent amidation of deamido-NAD to form NAD. Uses ammonia as a nitrogen source	nadE	-	6.3.1.5	ko:K01916	ko00760,ko01100,map00760,map01100	M00115	R00189	RC00100	ko00000,ko00001,ko00002,ko01000	-	-	-	NAD_synthase	operon0081								0.0152888	0.00477982	-0.00427123	0.884313	0.972255	0.961507	FALSE	-0.230595	-0.248998	-0.264373	0.0361243	0.0853957	0.0443371	FALSE	208.131
agat-gene-124	paeni_NIB01_000127	148012	148446	-		protein_coding					BrxA/BrxB family bacilliredoxin		Belongs to the UPF0403 family	yphP	-	-	-	-	-	-	-	-	-	-	-	Disulph_isomer	operon0082								0.70421	0.653577	0.637183	0.000351396	0.00165247	0.000100853	FALSE	0.216539	0.128699	0.0973185	0.0539889	0.385133	0.515109	FALSE	268.395
agat-gene-125	paeni_NIB01_000128	148615	150336	-		protein_coding					ATP-binding protein		Signal transduction histidine kinase	kinA	-	-	ko:K17763	-	-	-	-	ko00000,ko03021	-	-	-	HATPase_c,HisKA,PAS_4,PAS_8,PAS_9,STAS	operon0083								-1.77778	-1.76612	-1.75624	7.44731e-07	1.66417e-06	1.85729e-37	TRUE	0.116734	0.0714343	0.0396218	0.41292	0.697441	0.840997	FALSE	371.463
agat-gene-126	paeni_NIB01_000129	150506	151771	+		protein_coding					NAD(P)/FAD-dependent oxidoreductase		HI0933-like protein	ytfP	-	-	ko:K07007	-	-	-	-	ko00000	-	-	-	HI0933_like	operon0084								-0.651492	-0.570304	-0.564762	0.00355289	0.0111071	0.00395886	FALSE	0.341265	0.243791	0.204075	0.0100304	0.100306	0.152719	FALSE	128.168
agat-gene-127	paeni_NIB01_000130	151950	152333	-		protein_coding					hypothetical protein		-	-	-	-	-	-	-	-	-	-	-	-	-	-	operon0085								1.30298	1.34555	1.31285	8.03391e-05	0.000150866	8.65013e-12	TRUE	-0.460533	-0.52947	-0.487434	0.035972	0.0301638	0.0247132	FALSE	16.4013
agat-gene-129	paeni_NIB01_000132	153718	154449	-		protein_coding					ABC transporter ATP-binding protein		ABC transporter, ATP-binding protein	ythP	-	-	ko:K01990	-	M00254	-	-	ko00000,ko00002,ko02000	3.A.1	-	-	ABC_tran	operon0086	operon0027							1.61702	1.65593	1.62312	3.60936e-06	7.29606e-06	2.93021e-21	TRUE	-0.895833	-0.783973	-0.700656	0.00513152	0.0270921	0.0102016	FALSE	24.1122
agat-gene-128	paeni_NIB01_000131	152449	153699	-		protein_coding					ABC transporter permease		Bacterial ABC transporter protein EcsB	ythQ	-	-	ko:K01992	-	M00254	-	-	ko00000,ko00002,ko02000	3.A.1	-	-	EcsB	operon0086	operon0027							1.54212	1.56492	1.5378	2.46634e-06	4.01675e-06	1.92738e-25	TRUE	-0.408533	-0.359585	-0.343345	0.0180824	0.0966469	0.0733945	FALSE	33.8644
agat-gene-130	paeni_NIB01_000133	154656	154949	+		protein_coding		DNA binding|0003677||IEA		GO:0003677	AbrB/MazE/SpoVT family DNA-binding domain-containing protein		SpoVT / AbrB like domain	-	-	-	ko:K07172,ko:K18842	-	-	-	-	ko00000,ko02048	-	-	-	MazE_antitoxin	operon0087	operon0028							0.841654	0.739595	0.698721	0.0136333	0.0102071	0.00278571	FALSE	-0.121484	0.0705095	0.0316828	0.647123	0.819136	0.914689	FALSE	10.2584
agat-gene-131	paeni_NIB01_000134	154952	155344	+		protein_coding		kinase activity|0016301||IEA		GO:0016301	type II toxin-antitoxin system death-on-curing family toxin		killer protein	doc	-	-	ko:K07341	-	-	-	-	ko00000,ko02048	-	-	-	Fic	operon0087	operon0028							0.70478	0.599064	0.559672	0.0120054	0.0135129	0.00623829	FALSE	0.26616	0.373789	0.312826	0.101311	0.0556646	0.0805514	FALSE	13.9852
agat-gene-132	paeni_NIB01_000135	155449	156768	-		protein_coding					MFS transporter		COG0477 Permeases of the major facilitator superfamily	yfiS	-	-	-	-	-	-	-	-	-	-	-	MFS_1,MFS_2	operon0088								2.57434	2.47232	2.44863	5.39205e-07	9.89993e-07	4.05747e-53	TRUE	1.02579	1.01316	0.895147	0.000416755	0.00308807	0.000568519	FALSE	9.88075
agat-gene-133	paeni_NIB01_000136	157076	157537	+		protein_coding					MarR family transcriptional regulator		MarR family transcriptional regulator	ykoM	GO:0001067,GO:0003674,GO:0003676,GO:0003677,GO:0005488,GO:0006355,GO:0008150,GO:0009889,GO:0010468,GO:0010556,GO:0019219,GO:0019222,GO:0031323,GO:0031326,GO:0044212,GO:0050789,GO:0050794,GO:0051171,GO:0051252,GO:0060255,GO:0065007,GO:0080090,GO:0097159,GO:1901363,GO:1903506,GO:2000112,GO:2001141	-	ko:K15973	-	-	-	-	ko00000,ko03000	-	-	-	MarR	operon0089								3.38543	3.4436	3.41166	2.29973e-07	3.11765e-07	5.40864e-65	TRUE	0.349136	0.351304	0.298825	0.0153257	0.0482612	0.0603079	FALSE	5.98427
agat-gene-135	paeni_NIB01_000138	157835	158323	-		protein_coding					hypothetical protein		-	-	-	-	-	-	-	-	-	-	-	-	-	-	operon0090	operon0029							-0.323297	-0.373592	-0.371657	0.184434	0.118744	0.0445007	FALSE	NA	NA	NA	NA	NA	NA	#VALUE!	11.1641
agat-gene-134	paeni_NIB01_000137	157618	157803	-		protein_coding					hypothetical protein																operon0090	operon0029							1.21128	1.15461	1.08422	0.000675818	0.00101954	3.96464e-07	TRUE	NA	NA	NA	NA	NA	NA	#VALUE!	3.26987
agat-gene-137	paeni_NIB01_000140	160079	160651	-		protein_coding					GNAT family N-acetyltransferase		COG1670 Acetyltransferases, including N-acetylases of ribosomal proteins	ynaD1	-	2.3.1.128	ko:K03790	-	-	-	-	ko00000,ko01000,ko03009	-	-	-	Acetyltransf_3	operon0091	operon0030							-1.44527	-1.36665	-1.34758	0.000138999	0.000175037	7.64979e-13	TRUE	0.0764578	0.0511897	0.0201779	0.753665	0.85056	0.943611	FALSE	34.0422
agat-gene-136	paeni_NIB01_000139	158451	159959	-		protein_coding					MFS transporter		Major facilitator superfamily	bmr3_1	-	-	ko:K18935	-	-	-	-	ko00000,ko02000	2.A.1.3.60	-	-	MFS_1	operon0091	operon0030							-2.12824	-2.07221	-2.07401	2.13849e-06	8.88612e-07	3.31878e-40	TRUE	-0.333693	-0.232634	-0.231412	0.0416311	0.200595	0.192576	FALSE	93.9041
agat-gene-138	paeni_NIB01_000141	160848	161144	-		protein_coding					hypothetical protein		-	M1-878	-	-	-	-	-	-	-	-	-	-	-	-	operon0092								9.59224	9.68685	9.6645	1.58593e-08	5.26687e-08	3.24368e-191	TRUE	-0.149412	-0.217587	-0.19644	0.341832	0.413692	0.394061	FALSE	0.467906
agat-gene-139	paeni_NIB01_000142	161331	161819	+		protein_coding					GAF domain-containing protein		GAF domain-containing protein	ytsP	-	1.8.4.14	ko:K08968	ko00270,map00270	-	R02025	RC00639	ko00000,ko00001,ko01000	-	-	-	GAF_2	operon0093								-0.695569	-0.725257	-0.726101	0.00011888	0.000258568	9.64786e-09	FALSE	0.685557	0.579905	0.526209	2.13229e-05	0.00256986	0.000348272	FALSE	281.359
agat-gene-140	paeni_NIB01_000143	161975	162790	-		protein_coding					TipAS antibiotic-recognition domain-containing protein		MerR family transcriptional regulator	mta	-	2.1.1.37	ko:K00558,ko:K13639,ko:K13640,ko:K21743	ko00270,ko01100,ko05206,map00270,map01100,map05206	M00035	R04858	RC00003,RC00332	ko00000,ko00001,ko00002,ko01000,ko02048,ko03000,ko03032,ko03036	-	-	-	MerR,MerR_1,TipAS	operon0094								7.18712	7.17786	7.16342	3.88612e-09	1.24686e-08	1.62854e-235	TRUE	-0.109578	-0.181363	-0.164775	0.506992	0.509391	0.481677	FALSE	3.86912
agat-gene-141	paeni_NIB01_000144	163157	164581	-		protein_coding					aldehyde dehydrogenase family protein		Catalyzes the oxidation of malonate semialdehyde (MSA) and methylmalonate semialdehyde (MMSA) into acetyl-CoA and propanoyl-CoA, respectively	gabD	-	-	-	-	-	-	-	-	-	-	-	Aldedh	operon0095								2.77906	2.70722	2.67828	2.05433e-07	7.91664e-07	6.71279e-40	TRUE	-1.14335	-1.13999	-1.09653	4.6943e-06	0.000783771	1.34449e-06	TRUE	29.0266
agat-gene-143	paeni_NIB01_000146	165114	166331	-		protein_coding					MFS transporter		Major facilitator superfamily	yfmO	-	-	ko:K08221	-	-	-	-	ko00000,ko02000	2.A.1.32	-	-	MFS_1,Usp	operon0095	operon0031							0.951903	0.812359	0.754174	0.0239065	0.014899	0.00548387	FALSE	-0.294092	-0.222596	-0.218615	0.077541	0.264442	0.251467	FALSE	5.75169
agat-gene-142	paeni_NIB01_000145	164672	165094	-		protein_coding					universal stress protein		Universal stress protein	uspF	GO:0000166,GO:0003674,GO:0003824,GO:0004017,GO:0005488,GO:0005524,GO:0005575,GO:0005622,GO:0005623,GO:0005737,GO:0006139,GO:0006464,GO:0006468,GO:0006725,GO:0006753,GO:0006793,GO:0006796,GO:0006807,GO:0006950,GO:0006979,GO:0007155,GO:0008144,GO:0008150,GO:0008152,GO:0009058,GO:0009117,GO:0009123,GO:0009165,GO:0009987,GO:0016301,GO:0016310,GO:0016740,GO:0016772,GO:0016776,GO:0017076,GO:0018117,GO:…	-	ko:K11932,ko:K14061	-	-	-	-	ko00000	-	-	-	Usp	operon0095	operon0031							1.0834	0.904093	0.79203	0.0558061	0.0543852	0.0254621	FALSE	-0.753397	-0.432274	-0.32939	0.0299539	0.233245	0.241982	FALSE	2.62137
agat-gene-144	paeni_NIB01_000147	166474	166914	-		protein_coding			regulation of transcription, DNA-templated|0006355||IEA	GO:0006355	MerR family transcriptional regulator		MerR family regulatory protein	yfmP	-	-	ko:K21902	-	-	-	-	ko00000,ko03000	-	-	-	MerR-DNA-bind,MerR_1	operon0096	operon0031							2.45027	2.10758	2.01343	0.000384846	0.000343266	6.7712e-09	TRUE	0.665898	0.552903	0.436789	0.010192	0.0562496	0.0782892	FALSE	2.69525
agat-gene-145	paeni_NIB01_000148	167163	167522	-		protein_coding					SdpI family protein		SdpI/YhfL protein family	yfhL	-	-	-	-	-	-	-	-	-	-	-	DUF1648,SdpI	operon0097	operon0032							-0.970841	-1.10012	-1.08268	0.00120856	0.000317134	8.47167e-08	FALSE	1.35041	1.48424	1.39809	2.38034e-05	0.00016008	7.7057e-09	TRUE	84.639
agat-gene-146	paeni_NIB01_000149	167623	170010	-	cadA	protein_coding		ABC-type cadmium transporter activity|0015434||IEA	cadmium ion transport|0015691||IEA	GO:0015691, GO:0015434	cadmium-translocating P-type ATPase		COG2217 Cation transport ATPase	cadA	GO:0005575,GO:0005623,GO:0005886,GO:0016020,GO:0044464,GO:0071944	3.6.3.3,3.6.3.5	ko:K01534	-	-	-	-	ko00000,ko01000	3.A.3.6	-	-	E1-E2_ATPase,HMA,Hydrolase	operon0098	operon0032							0.717096	0.48893	0.450553	0.0370438	0.157911	0.170521	FALSE	0.906311	0.816635	0.7551	2.71145e-06	0.000544294	3.25726e-06	FALSE	247.793
agat-gene-147	paeni_NIB01_000150	170274	170645	+		protein_coding		DNA-binding transcription factor activity|0003700||IEA	regulation of transcription, DNA-templated|0006355||IEA	GO:0006355, GO:0003700	metalloregulator ArsR/SmtB family transcription factor		arsR family transcriptional regulator	czrA	-	-	ko:K21903	-	-	-	-	ko00000,ko03000	-	-	-	HTH_5	operon0099								0.912948	0.86943	0.849001	8.13673e-06	4.69163e-05	3.09438e-17	FALSE	-0.519164	-0.627646	-0.594613	0.00179814	0.0101063	0.00272128	FALSE	71.3598
agat-gene-148	paeni_NIB01_000151	170786	171946	-		protein_coding					AI-2E family transporter		AI-2E family transporter	yubA	GO:0003674,GO:0005215,GO:0005575,GO:0005623,GO:0005886,GO:0005887,GO:0006810,GO:0008150,GO:0016020,GO:0016021,GO:0031224,GO:0031226,GO:0044425,GO:0044459,GO:0044464,GO:0051179,GO:0051234,GO:0055085,GO:0071944	-	-	-	-	-	-	-	-	-	-	AI-2E_transport	operon0100								1.31498	1.2597	1.22899	1.21845e-05	6.53246e-05	1.55291e-11	TRUE	-0.303886	-0.161867	-0.173381	0.0329959	0.324487	0.271991	FALSE	38.7322
agat-gene-149	paeni_NIB01_000152	172262	173296	-		protein_coding					LLM class flavin-dependent oxidoreductase		luciferase	yvbT	GO:0005575,GO:0005622,GO:0005623,GO:0005737,GO:0005829,GO:0044424,GO:0044444,GO:0044464	-	-	-	-	-	-	-	-	-	-	Bac_luciferase	operon0101								3.47886	3.42945	3.39501	1.25327e-07	4.67147e-07	6.11934e-54	TRUE	1.73681	1.67063	1.61989	1.01696e-08	5.85372e-06	8.36582e-23	TRUE	7.35242
agat-gene-150	paeni_NIB01_000153	173460	173771	-		protein_coding					ArsR family transcriptional regulator		ArsR family transcriptional regulator	arsR3	-	-	-	-	-	-	-	-	-	-	-	HTH_20,HTH_5	operon0102								0.542165	0.483644	0.465748	0.00184806	0.00574927	0.000377875	FALSE	0.866405	0.711532	0.623385	9.82336e-05	0.00750318	0.00276169	FALSE	282.013
agat-gene-151	paeni_NIB01_000154	173865	174446	-		protein_coding					NAD(P)H-dependent oxidoreductase		NADPH dehydrogenase	Z012_09595	-	1.6.5.2	ko:K00355	ko00130,ko01110,ko05200,ko05225,ko05418,map00130,map01110,map05200,map05225,map05418	-	R02964,R03643,R03816	RC00819	ko00000,ko00001,ko01000	-	-	-	Flavodoxin_2	operon0102								-0.0136866	-0.0787203	-0.0924639	0.971947	0.787593	0.761654	FALSE	1.78195	1.72528	1.53051	0.000170178	0.00159988	9.86924e-05	TRUE	4.50394
agat-gene-152	paeni_NIB01_000155	174626	175048	-		protein_coding					MarR family transcriptional regulator		transcriptional	rmaB	-	-	ko:K06075	-	-	-	-	ko00000,ko03000	-	-	-	MarR,MarR_2	operon0103								-1.31258	-1.27537	-1.28402	0.000136784	0.000104521	4.2851e-12	TRUE	0.986331	0.837125	0.757624	7.92415e-05	0.00166654	9.26775e-05	FALSE	50.9853
agat-gene-153	paeni_NIB01_000156	175172	175849	-		protein_coding					NAD(P)H-dependent oxidoreductase		nitroreductase	frp	-	-	-	-	-	-	-	-	-	-	iYO844.BSU07830	Nitroreductase	operon0103								-1.10555	-1.08217	-1.09991	0.00022772	0.00020609	1.1269e-12	TRUE	-0.0938092	0.0203531	-0.00464664	0.492822	0.915519	0.980987	FALSE	33.2131
agat-gene-154	paeni_NIB01_000157	176113	176571	-		protein_coding					DUF523 domain-containing protein		Protein of unknown function (DUF523)	ybbK	-	2.4.2.1,6.3.2.4	ko:K01921,ko:K03783	ko00230,ko00240,ko00473,ko00550,ko00760,ko01100,ko01110,ko01502,map00230,map00240,map00473,map00550,map00760,map01100,map01110,map01502	-	R01150,R01561,R01863,R01969,R02147,R02294,R02295,R02297,R02484,R02557,R02748,R08368,R10244	RC00033,RC00063,RC00064,RC00122,RC00141	ko00000,ko00001,ko01000,ko01011	-	-	-	DUF523	operon0104								0.0519343	0.042375	0.030818	0.771893	0.790502	0.860691	FALSE	0.413192	0.393534	0.328605	0.0152175	0.0441239	0.0666022	FALSE	41.9309
agat-gene-155	paeni_NIB01_000158	176632	177888	-		protein_coding					hypothetical protein		-	-	-	-	-	-	-	-	-	-	-	-	-	-	operon0104	operon0033							1.35758	1.42389	1.36528	0.000233261	0.000155245	8.98035e-11	TRUE	NA	NA	NA	NA	NA	NA	#VALUE!	4.28777
agat-gene-156	paeni_NIB01_000159	177885	178463	-		protein_coding					RNA polymerase sigma factor		Belongs to the sigma-70 factor family	-	-	-	ko:K03088	-	-	-	-	ko00000,ko03021	-	-	-	Sigma70_r2,Sigma70_r4_2	operon0104	operon0033							0.0372155	0.0599623	0.0387305	0.918775	0.859514	0.917917	FALSE	NA	NA	NA	NA	NA	NA	#VALUE!	1.89899
agat-gene-157	paeni_NIB01_000160	178638	179372	-		protein_coding		methyltransferase activity|0008168||IEA		GO:0008168	methyltransferase domain-containing protein		Methyltransferase	bioC_2	-	-	-	-	-	-	-	-	-	-	-	Methyltransf_11,Methyltransf_25	operon0105								-0.627952	-0.607589	-0.59281	0.0479787	0.041861	0.0111982	FALSE	-0.528465	-0.161212	-0.145331	0.0721231	0.607075	0.569872	FALSE	34.937
agat-gene-158	paeni_NIB01_000161	179611	179967	-		protein_coding					FlxA-like family protein		FlxA-like protein	-	-	-	-	-	-	-	-	-	-	-	-	FlxA	operon0106								1.33819	1.37787	1.36007	3.64329e-06	6.55911e-06	1.55412e-27	TRUE	0.504999	0.496572	0.439188	0.00113584	0.00988146	0.00569616	FALSE	41.5971
agat-gene-159	paeni_NIB01_000162	180128	181333	-		protein_coding					TraB/GumN family protein		TraB family	ybaP	-	-	ko:K02237,ko:K09973	-	M00429	-	-	ko00000,ko00002,ko02044	3.A.11.1,3.A.11.2	-	-	TraB	operon0107								-0.458638	-0.401957	-0.404181	0.00683228	0.0323378	0.012539	FALSE	-0.111048	-0.0462238	-0.0666678	0.337161	0.768296	0.655445	FALSE	136.193
agat-gene-160	paeni_NIB01_000163	181864	182028	-		protein_coding					hypothetical protein																operon0108		c1	phosphonate					0.259129	0.149405	0.0892476	0.502297	0.681078	0.77846	FALSE	NA	NA	NA	NA	NA	NA	#VALUE!	1.32437
gene-paeni_NIB01_000164	paeni_NIB01_000164	182970	183059	+		tRNA																					operon0109								#N/A	#N/A	#N/A	#N/A	#N/A	#N/A	#N/A	NA	NA	NA	NA	NA	NA	#VALUE!	NA
agat-gene-161	paeni_NIB01_000165	183175	184119	-		protein_coding					DUF2156 domain-containing protein																operon0110	operon0034	c1	phosphonate					-0.266581	-2.15507	-1.67211	0.843007	0.0665911	NA	FALSE	NA	NA	NA	NA	NA	NA	#VALUE!	16.1496
agat-gene-162	paeni_NIB01_000166	184260	184754	-	purE	protein_coding	phosphoribosylaminoimidazole carboxylase complex|0009320||IEA	phosphoribosylaminoimidazole carboxylase activity|0004638||IEA	purine ribonucleotide biosynthetic process|0009152||IEA	GO:0009152, GO:0004638, GO:0009320	5-(carboxyamino)imidazole ribonucleotide mutase		Catalyzes the conversion of N5-carboxyaminoimidazole ribonucleotide (N5-CAIR) to 4-carboxy-5-aminoimidazole ribonucleotide (CAIR)	purE	GO:0003674,GO:0003824,GO:0004638,GO:0005488,GO:0005515,GO:0005575,GO:0005622,GO:0005623,GO:0005737,GO:0005829,GO:0006139,GO:0006163,GO:0006164,GO:0006725,GO:0006753,GO:0006793,GO:0006796,GO:0006807,GO:0008150,GO:0008152,GO:0009058,GO:0009117,GO:0009150,GO:0009152,GO:0009165,GO:0009259,GO:0009260,GO:0009987,GO:0016829,GO:0016830,GO:0016831,GO:0016853,GO:0016866,GO:0018130,GO:0019438,GO:0019637,GO:…	5.4.99.18	ko:K01588	ko00230,ko01100,ko01110,ko01130,map00230,map01100,map01110,map01130	M00048	R07405	RC01947	ko00000,ko00001,ko00002,ko01000	-	-	iETEC_1333.ETEC_0575,iJN746.PP_5336,iPC815.YPO3076,iUTI89_1310.UTI89_C0551	AIRC	operon0111	operon0034	c1	phosphonate					-1.07087	-2.99158	-2.56561	0.516552	0.0329158	NA	FALSE	NA	NA	NA	NA	NA	NA	#VALUE!	7.93798
agat-gene-167	paeni_NIB01_000171	188829	189581	-		protein_coding					ABC-2 family transporter protein		ABC transporter permease	-	-	-	ko:K01992	-	M00254	-	-	ko00000,ko00002,ko02000	3.A.1	-	-	ABC2_membrane_6	operon0111	operon0034	c1	phosphonate					0.515011	-2.10515	-1.15926	0.761427	0.197557	NA	FALSE	NA	NA	NA	NA	NA	NA	#VALUE!	1.92909
agat-gene-168	paeni_NIB01_000172	189638	190429	-		protein_coding					ABC-2 family transporter protein		ABC-2 family transporter protein	-	-	-	ko:K01992	-	M00254	-	-	ko00000,ko00002,ko02000	3.A.1	-	-	ABC2_membrane_6	operon0111	operon0034	c1	phosphonate					-1.12059	-3.61363	-2.63086	0.582483	0.0464624	NA	FALSE	NA	NA	NA	NA	NA	NA	#VALUE!	4.58603
agat-gene-166	paeni_NIB01_000170	187822	188781	-		protein_coding		ATP binding|0005524||IEA		GO:0005524	ATP-binding cassette domain-containing protein		ABC transporter	-	-	-	ko:K01990	-	M00254	-	-	ko00000,ko00002,ko02000	3.A.1	-	-	ABC_tran,DUF4162	operon0111	operon0034	c1	phosphonate					-0.588974	-3.14672	-2.08922	0.765587	0.0737523	NA	FALSE	NA	NA	NA	NA	NA	NA	#VALUE!	3.28355
agat-gene-164	paeni_NIB01_000168	185348	186061	-		protein_coding					hypothetical protein		Phosphorylation of dTMP to form dTDP in both de novo and salvage pathways of dTTP synthesis	tmk	GO:0003674,GO:0003824,GO:0004798,GO:0005575,GO:0005622,GO:0005623,GO:0005737,GO:0005829,GO:0006139,GO:0006220,GO:0006221,GO:0006227,GO:0006233,GO:0006235,GO:0006725,GO:0006753,GO:0006793,GO:0006796,GO:0006807,GO:0008150,GO:0008152,GO:0009041,GO:0009058,GO:0009117,GO:0009123,GO:0009132,GO:0009133,GO:0009138,GO:0009139,GO:0009141,GO:0009142,GO:0009147,GO:0009148,GO:0009165,GO:0009186,GO:0009189,GO:…	2.7.4.9	ko:K00943	ko00240,ko01100,map00240,map01100	M00053	R02094,R02098	RC00002	ko00000,ko00001,ko00002,ko01000	-	-	iECABU_c1320.ECABU_c13120,ic_1306.c1370	Thymidylate_kin	operon0111	operon0034	c1	phosphonate					-0.861879	-2.98352	-2.26804	0.629283	0.0448294	NA	FALSE	NA	NA	NA	NA	NA	NA	#VALUE!	7.3059
agat-gene-163	paeni_NIB01_000167	184771	185346	-		protein_coding					hypothetical protein																operon0111	operon0034	c1	phosphonate					-0.9527	-3.02329	-2.35211	0.585697	0.0447519	NA	FALSE	NA	NA	NA	NA	NA	NA	#VALUE!	5.56288
agat-gene-165	paeni_NIB01_000169	186082	187791	-		protein_coding					nucleotidyltransferase family protein		Uncharacterised nucleotidyltransferase	-	-	-	-	-	-	-	-	-	-	-	-	CbiA,Glyco_tranf_2_4,Glyco_transf_7C,Glycos_transf_1,Glycos_transf_2,Methyltransf_24,NTP_transf_5	operon0111	operon0034	c1	phosphonate					-0.993848	-2.68276	-2.32235	0.486849	0.0294391	NA	FALSE	NA	NA	NA	NA	NA	NA	#VALUE!	18.6232
agat-pseudogene-1	paeni_NIB01_000173	190899	191183	-		pseudogene					nitronate monooxygenase	incomplete; partial on complete genome; missing N-terminus and C-terminus															operon0112		c1	phosphonate					-0.847386	-0.985943	-0.921787	0.0966566	0.0503027	0.0148313	FALSE	NA	NA	NA	NA	NA	NA	#VALUE!	4.32881
agat-gene-169	paeni_NIB01_000174	191602	192888	+		protein_coding		transposase activity|0004803||IEA		GO:0004803	IS110 family transposase		transposase IS116 IS110 IS902 family protein	-	-	-	-	-	-	-	-	-	-	-	-	DEDD_Tnp_IS110,Transposase_20	operon0113		c1	phosphonate					-2.15887	-2.2798	NA	0.000776234	8.5606e-05	NA	#VALUE!	0.106432	0.0418153	0.00518336	0.761628	0.915582	0.985816	FALSE	7.90241
agat-gene-170	paeni_NIB01_000175	193139	193285	+		protein_coding					hypothetical protein																operon0114		c1	phosphonate					-0.25193	-0.302377	NA	0.642282	0.704839	NA	#VALUE!	NA	NA	NA	NA	NA	NA	#VALUE!	0.517159
agat-gene-171	paeni_NIB01_000176	193505	193735	-		protein_coding					hypothetical protein		Putative sugar-binding domain	deoR_2	-	-	-	-	-	-	-	-	-	-	-	HTH_24,Sigma70_r4,Sugar-bind	operon0115	operon0035	c1	phosphonate					0.0337158	-0.104341	-0.109387	0.938756	0.774531	0.757866	FALSE	1.25752	1.0013	0.824737	0.000640193	0.0148586	0.0081298	FALSE	2.6241
agat-gene-172	paeni_NIB01_000177	193847	194005	-		protein_coding					hypothetical protein		ABC transporter substrate-binding protein	afuA	-	-	ko:K02012	ko02010,map02010	M00190	-	-	ko00000,ko00001,ko00002,ko02000	3.A.1.10	-	-	SBP_bac_11,SBP_bac_6,SBP_bac_8	operon0116	operon0035	c1	phosphonate					-0.726002	-0.734826	NA	0.161153	0.167899	NA	#VALUE!	NA	NA	NA	NA	NA	NA	#VALUE!	1.28879
agat-gene-173	paeni_NIB01_000178	194088	194924	-		protein_coding		hydrolase activity|0016787||IEA	metabolic process|0008152||IEA	GO:0008152, GO:0016787	Cof-type HAD-IIB family hydrolase		Sucrose-6F-phosphate phosphohydrolase	-	-	-	-	-	-	-	-	-	-	-	-	Hydrolase_3	operon0117	operon0035	c1	phosphonate					0.181909	0.109012	0.0941062	0.581786	0.741045	0.760548	FALSE	1.01151	0.882958	0.791366	3.64874e-05	0.00159278	0.000249938	FALSE	7.14172
agat-gene-174	paeni_NIB01_000179	195353	196300	-		protein_coding					DMT family transporter																operon0118		c1	phosphonate					0.98248	0.919574	0.878557	0.00156361	0.00288292	2.78897e-05	FALSE	0.260857	0.662894	0.500915	0.333803	0.0630928	0.0626458	FALSE	19.5891
agat-gene-180	paeni_NIB01_000185	200702	201613	-		protein_coding					isocitrate lyase/phosphoenolpyruvate mutase family protein		Phosphoenolpyruvate phosphomutase	pphA	-	5.4.2.9	ko:K01841	ko00440,ko01100,ko01120,ko01130,map00440,map01100,map01120,map01130	-	R00661	RC02792	ko00000,ko00001,ko01000	-	-	-	NTP_transf_3,PEP_mutase	operon0119	operon0036	c1	phosphonate					0.409979	0.455868	0.436305	0.326427	0.217412	0.0843553	FALSE	NA	NA	NA	NA	NA	NA	#VALUE!	3.44773
agat-gene-178	paeni_NIB01_000183	199224	200171	-		protein_coding					NAD(P)-binding domain-containing protein		D-isomer specific 2-hydroxyacid dehydrogenase	-	-	1.1.1.399,1.1.1.95	ko:K00058	ko00260,ko00680,ko01100,ko01120,ko01130,ko01200,ko01230,map00260,map00680,map01100,map01120,map01130,map01200,map01230	M00020	R01513	RC00031	ko00000,ko00001,ko00002,ko01000,ko04147	-	-	-	2-Hacid_dh,2-Hacid_dh_C	operon0119	operon0036	c1	phosphonate					1.01836	0.922026	0.90211	0.0015339	0.00189305	1.08154e-06	FALSE	NA	NA	NA	NA	NA	NA	#VALUE!	6.50417
agat-gene-177	paeni_NIB01_000182	198025	199227	-		protein_coding					phosphoglycerate kinase		Phosphoglycerate kinase	pgk	GO:0001871,GO:0002020,GO:0003674,GO:0003824,GO:0004618,GO:0005488,GO:0005515,GO:0005575,GO:0005576,GO:0005618,GO:0005622,GO:0005623,GO:0005737,GO:0005829,GO:0005886,GO:0005975,GO:0006082,GO:0006090,GO:0006091,GO:0006096,GO:0006139,GO:0006163,GO:0006164,GO:0006165,GO:0006725,GO:0006732,GO:0006733,GO:0006753,GO:0006754,GO:0006757,GO:0006793,GO:0006796,GO:0006807,GO:0008150,GO:0008152,GO:0009056,GO:…	2.7.2.3,5.3.1.1	ko:K00927,ko:K01803	ko00010,ko00051,ko00562,ko00710,ko01100,ko01110,ko01120,ko01130,ko01200,ko01230,map00010,map00051,map00562,map00710,map01100,map01110,map01120,map01130,map01200,map01230	M00001,M00002,M00003,M00165,M00166,M00308,M00552	R01015,R01512	RC00002,RC00043,RC00423	ko00000,ko00001,ko00002,ko01000,ko04147	-	-	iSB619.SA_RS04145,iSbBS512_1146.SbBS512_E3351	PGK	operon0119	operon0036	c1	phosphonate					-0.182947	-0.10407	-0.0986055	0.493745	0.706003	0.674238	FALSE	NA	NA	NA	NA	NA	NA	#VALUE!	8.8136
agat-gene-179	paeni_NIB01_000184	200191	200685	-		protein_coding					phosphoribosyltransferase		Phosphoribosyl transferase domain	gpt	-	2.4.2.22	ko:K00769,ko:K07101	ko00230,ko01100,ko01110,map00230,map01100,map01110	-	R01229,R02142	RC00063,RC00122	ko00000,ko00001,ko01000	-	-	-	Pribosyltran	operon0119	operon0036	c1	phosphonate					0.985812	0.856539	0.798013	0.00234885	0.00451048	0.00201785	FALSE	NA	NA	NA	NA	NA	NA	#VALUE!	1.94003
agat-gene-181	paeni_NIB01_000186	201619	202308	-	rpiA	protein_coding		ribose-5-phosphate isomerase activity|0004751||IEA	pentose-phosphate shunt, non-oxidative branch|0009052||IEA	GO:0009052, GO:0004751	ribose-5-phosphate isomerase RpiA		Catalyzes the reversible conversion of ribose-5- phosphate to ribulose 5-phosphate	rpiA	GO:0003674,GO:0003824,GO:0004751,GO:0005575,GO:0005622,GO:0005623,GO:0005737,GO:0005829,GO:0005975,GO:0005996,GO:0006014,GO:0006081,GO:0006098,GO:0006139,GO:0006725,GO:0006732,GO:0006733,GO:0006739,GO:0006753,GO:0006793,GO:0006796,GO:0006807,GO:0008150,GO:0008152,GO:0009052,GO:0009117,GO:0009987,GO:0016853,GO:0016860,GO:0016861,GO:0019321,GO:0019362,GO:0019637,GO:0019682,GO:0019693,GO:0034641,GO:…	2.7.1.12,5.3.1.6	ko:K00851,ko:K01807	ko00030,ko00710,ko01100,ko01110,ko01120,ko01130,ko01200,ko01230,map00030,map00710,map01100,map01110,map01120,map01130,map01200,map01230	M00004,M00007,M00165,M00167,M00580	R01056,R01737	RC00002,RC00017,RC00434	ko00000,ko00001,ko00002,ko01000	-	-	-	Rib_5-P_isom_A	operon0119	operon0036	c1	phosphonate					1.26031	1.18393	1.11234	0.00551781	0.00403112	3.58043e-05	TRUE	NA	NA	NA	NA	NA	NA	#VALUE!	3.08654
agat-gene-176	paeni_NIB01_000181	197112	198017	-	prs	protein_coding		ribose phosphate diphosphokinase activity|0004749||IEA	purine ribonucleotide biosynthetic process|0009152||IEA	GO:0009152, GO:0004749	ribose-phosphate diphosphokinase		Involved in the biosynthesis of the central metabolite phospho-alpha-D-ribosyl-1-pyrophosphate (PRPP) via the transfer of pyrophosphoryl group from ATP to 1-hydroxyl of ribose-5-phosphate (Rib-5-P)	prs	GO:0000287,GO:0003674,GO:0003824,GO:0004749,GO:0005488,GO:0005575,GO:0005622,GO:0005623,GO:0005737,GO:0005829,GO:0006015,GO:0006139,GO:0006163,GO:0006164,GO:0006725,GO:0006753,GO:0006793,GO:0006796,GO:0006807,GO:0008150,GO:0008152,GO:0009058,GO:0009117,GO:0009150,GO:0009152,GO:0009165,GO:0009259,GO:0009260,GO:0009987,GO:0016740,GO:0016772,GO:0016778,GO:0018130,GO:0019438,GO:0019637,GO:0019693,GO:…	2.7.6.1	ko:K00948	ko00030,ko00230,ko01100,ko01110,ko01120,ko01130,ko01200,ko01230,map00030,map00230,map01100,map01110,map01120,map01130,map01200,map01230	M00005	R01049	RC00002,RC00078	ko00000,ko00001,ko00002,ko01000	-	-	iAF1260.b1207,iAPECO1_1312.APECO1_323,iB21_1397.B21_01192,iBWG_1329.BWG_1032,iE2348C_1286.E2348C_1330,iEC042_1314.EC042_1264,iEC55989_1330.EC55989_1303,iECABU_c1320.ECABU_c14780,iECBD_1354.ECBD_2414,iECB_1328.ECB_01182,iECDH10B_1368.ECDH10B_1260,iECDH1ME8569_1439.ECDH1ME8569_1146,iECD_1391.ECD_01182,iECED1_1282.ECED1_1355,iECH74115_1262.ECH74115_1688,iECIAI1_1343.ECIAI1_1228,iECIAI39_1322.ECIAI39…	Pribosyl_synth,Pribosyltran_N	operon0119	operon0036	c1	phosphonate					0.473916	0.39802	0.382803	0.0695015	0.0978488	0.0582166	FALSE	NA	NA	NA	NA	NA	NA	#VALUE!	5.72159
agat-gene-175	paeni_NIB01_000180	196434	197105	-	rpe	protein_coding		D-ribulose-phosphate 3-epimerase activity|0004750||IEA	pentose-phosphate shunt|0006098||IEA	GO:0006098, GO:0004750	ribulose-phosphate 3-epimerase		Belongs to the ribulose-phosphate 3-epimerase family	rpe	GO:0003674,GO:0003824,GO:0004750,GO:0005488,GO:0005575,GO:0005622,GO:0005623,GO:0005737,GO:0005829,GO:0005975,GO:0005996,GO:0006081,GO:0006098,GO:0006139,GO:0006725,GO:0006732,GO:0006733,GO:0006739,GO:0006753,GO:0006793,GO:0006796,GO:0006807,GO:0008150,GO:0008152,GO:0009052,GO:0009056,GO:0009117,GO:0009987,GO:0016052,GO:0016853,GO:0016854,GO:0016857,GO:0019321,GO:0019323,GO:0019362,GO:0019637,GO:…	5.1.3.1	ko:K01783	ko00030,ko00040,ko00710,ko01100,ko01110,ko01120,ko01130,ko01200,ko01230,map00030,map00040,map00710,map01100,map01110,map01120,map01130,map01200,map01230	M00004,M00007	R01529	RC00540	ko00000,ko00001,ko00002,ko01000	-	-	-	Ribul_P_3_epim	operon0119	operon0036	c1	phosphonate					0.843775	0.762738	0.72774	0.0124653	0.0132293	0.000763829	FALSE	NA	NA	NA	NA	NA	NA	#VALUE!	6.58899
agat-gene-183	paeni_NIB01_000188	203456	204259	-		protein_coding					hypothetical protein																operon0120	operon0036	c1	phosphonate					2.71845	2.73124	2.7052	3.22896e-06	3.01937e-06	5.62844e-38	TRUE	NA	NA	NA	NA	NA	NA	#VALUE!	2.54202
agat-gene-182	paeni_NIB01_000187	202413	203459	-		protein_coding					type II glyceraldehyde-3-phosphate dehydrogenase																operon0120	operon0036	c1	phosphonate					1.62428	1.56761	1.50001	0.00111958	0.000853931	6.48466e-08	TRUE	NA	NA	NA	NA	NA	NA	#VALUE!	2.33953
agat-gene-184	paeni_NIB01_000189	205188	205910	-		protein_coding					hypothetical protein		SIR2-like domain	-	-	-	-	-	-	-	-	-	-	-	-	SIR2_2	operon0121	operon0037	c1	phosphonate					0.244344	0.310186	0.296331	0.0845964	0.0750855	0.0602289	FALSE	1.14788	1.20457	1.14203	1.97474e-06	6.71788e-05	2.7771e-11	TRUE	83.0985
agat-gene-185	paeni_NIB01_000190	205941	206126	-		protein_coding					hypothetical protein		SIR2-like domain	-	-	-	-	-	-	-	-	-	-	-	-	SIR2_2	operon0121	operon0037	c1	phosphonate					0.408159	0.366177	0.361974	0.0315597	0.0459541	0.00937333	FALSE	1.82767	1.71308	1.50745	0.00164442	0.00312023	0.000163083	TRUE	15.5339
agat-gene-186	paeni_NIB01_000191	206276	206719	-		protein_coding					hypothetical protein		SIR2-like domain	-	-	-	-	-	-	-	-	-	-	-	-	SIR2_2	operon0122		c1?	phosphonate					0.875151	0.834874	0.821568	4.68197e-05	0.000117451	2.36193e-15	FALSE	1.33946	1.45998	1.39404	6.27854e-07	4.29206e-05	4.10199e-13	TRUE	54.6739
agat-gene-189	paeni_NIB01_000194	210009	210905	-		protein_coding					ABC transporter ATP-binding protein		ABC transporter	M1-758	-	-	ko:K01990	-	M00254	-	-	ko00000,ko00002,ko02000	3.A.1	-	-	ABC_tran	operon0123	operon0038							-2.51992	-2.40226	-2.35102	0.000114538	1.41009e-05	6.55149e-18	TRUE	-1.01238	-1.2461	-1.09294	0.00535617	0.00748636	0.000914957	TRUE	127.856
agat-gene-187	paeni_NIB01_000192	207795	209093	-		protein_coding					ABC transporter permease		Potassium ABC transporter permease	yhaP	-	-	ko:K01992	-	M00254	-	-	ko00000,ko00002,ko02000	3.A.1	-	-	ABC2_membrane_3	operon0123	operon0038							-2.06583	-1.84351	-1.78638	8.406e-05	0.000130553	5.46546e-10	TRUE	-0.821461	-0.95837	-0.921259	0.000397582	0.00121456	1.49158e-05	FALSE	346.138
agat-gene-188	paeni_NIB01_000193	209086	209988	-		protein_coding		ATP binding|0005524||IEA		GO:0005524	ATP-binding cassette domain-containing protein		ABC transporter, ATP-binding protein	natA	-	-	ko:K01990	-	M00254	-	-	ko00000,ko00002,ko02000	3.A.1	-	-	ABC_tran,DUF4162	operon0123	operon0038							-2.41168	-2.25655	-2.18971	0.000112613	5.77967e-05	5.92433e-13	TRUE	-1.32489	-1.50684	-1.39754	0.000521042	0.00161881	1.28221e-05	TRUE	204.056
agat-gene-190	paeni_NIB01_000195	210921	211310	-		protein_coding			regulation of transcription, DNA-templated|0006355||IEA	GO:0006355	GntR family transcriptional regulator		Transcriptional regulator	gntR5	-	-	ko:K07978,ko:K07979	-	-	-	-	ko00000,ko03000	-	-	-	GntR	operon0123	operon0038							-2.94059	-2.77208	-2.65183	0.000493039	9.93738e-05	4.28705e-12	TRUE	NA	NA	NA	NA	NA	NA	#VALUE!	43.8162
agat-gene-191	paeni_NIB01_000196	211403	212170	-		protein_coding					hypothetical protein		-	M1-756	-	-	-	-	-	-	-	-	-	-	-	ABC2_membrane_5	operon0124	operon0038							-3.33098	-3.04826	-3.00322	0.000128524	2.38314e-05	1.41896e-17	TRUE	NA	NA	NA	NA	NA	NA	#VALUE!	66.8695
agat-gene-192	paeni_NIB01_000197	212356	212667	+		protein_coding					hypothetical protein																operon0125								0.593921	0.620287	0.557133	0.111333	0.0542182	0.0521291	FALSE	NA	NA	NA	NA	NA	NA	#VALUE!	1.98655
agat-gene-193	paeni_NIB01_000198	212776	213147	-		protein_coding					hypothetical protein		-	-	-	-	-	-	-	-	-	-	-	-	-	-	operon0126	operon0039							1.78056	1.90351	1.8589	0.000102298	3.29029e-05	1.51774e-15	TRUE	NA	NA	NA	NA	NA	NA	#VALUE!	8.78623
agat-gene-197	paeni_NIB01_000202	215113	215739	-		protein_coding					cytochrome (ubi)quinol oxidase subunit III		Cytochrome	cyoC	GO:0005575,GO:0005623,GO:0005886,GO:0016020,GO:0044464,GO:0071944	1.9.3.1	ko:K02276,ko:K02299	ko00190,ko01100,map00190,map01100	M00155,M00417	R00081	RC00016	ko00000,ko00001,ko00002,ko01000	3.D.4.4,3.D.4.5,3.D.4.6	-	-	COX3	operon0127	operon0039							1.59331	1.69917	1.64696	0.000177223	0.000113534	1.00195e-10	TRUE	NA	NA	NA	NA	NA	NA	#VALUE!	26.0358
agat-gene-195	paeni_NIB01_000200	213760	214683	-	ctaG	protein_coding					cytochrome c oxidase assembly factor CtaG		Cytochrome C oxidase assembly	ctaG	-	-	ko:K02862	-	-	-	-	ko00000	-	-	-	Caa3_CtaG	operon0127	operon0039							1.7317	1.79593	1.75394	4.52679e-05	2.09322e-05	7.14419e-17	TRUE	NA	NA	NA	NA	NA	NA	#VALUE!	13.0849
agat-gene-198	paeni_NIB01_000203	215736	217625	-	ctaD	protein_coding		cytochrome-c oxidase activity|0004129||IEA		GO:0004129	cytochrome c oxidase subunit I		Cytochrome c oxidase is the component of the respiratory chain that catalyzes the reduction of oxygen to water. Subunits 1- 3 form the functional core of the enzyme complex. CO I is the catalytic subunit of the enzyme. Electrons originating in cytochrome c are transferred via the copper A center of subunit 2 and heme A of subunit 1 to the bimetallic center formed by heme A3 and copper B	ctaD	GO:0003674,GO:0003824,GO:0005575,GO:0005623,GO:0005886,GO:0005887,GO:0006091,GO:0006810,GO:0006811,GO:0006812,GO:0008150,GO:0008152,GO:0009060,GO:0009486,GO:0009987,GO:0015002,GO:0015672,GO:0015980,GO:0015988,GO:0015990,GO:0016020,GO:0016021,GO:0016491,GO:0022900,GO:0022904,GO:0031224,GO:0031226,GO:0034220,GO:0044237,GO:0044425,GO:0044459,GO:0044464,GO:0045333,GO:0051179,GO:0051234,GO:0055085,GO:…	1.9.3.1	ko:K02274	ko00190,ko01100,map00190,map01100	M00155	R00081	RC00016	ko00000,ko00001,ko00002,ko01000	3.D.4.2,3.D.4.3,3.D.4.4,3.D.4.6	-	-	COX1	operon0127	operon0039							1.50708	1.63282	1.57792	9.50631e-05	0.000147632	8.50256e-10	TRUE	-0.514918	-0.529617	-0.456244	0.0453417	0.0893443	0.072813	FALSE	79.0405
agat-gene-199	paeni_NIB01_000204	217658	218710	-	coxB	protein_coding		cytochrome-c oxidase activity|0004129||IEA		GO:0004129	cytochrome c oxidase subunit II		Subunits I and II form the functional core of the enzyme complex. Electrons originating in cytochrome c are transferred via heme a and Cu(A) to the binuclear center formed by heme a3 and Cu(B)	ctaC	GO:0005575,GO:0005623,GO:0005886,GO:0006091,GO:0006119,GO:0006139,GO:0006163,GO:0006725,GO:0006753,GO:0006793,GO:0006796,GO:0006807,GO:0008150,GO:0008152,GO:0009117,GO:0009123,GO:0009126,GO:0009141,GO:0009144,GO:0009150,GO:0009161,GO:0009167,GO:0009199,GO:0009205,GO:0009259,GO:0009987,GO:0015980,GO:0016020,GO:0016310,GO:0017144,GO:0019637,GO:0019693,GO:0022900,GO:0022904,GO:0034641,GO:0042773,GO:…	1.10.3.12,1.9.3.1	ko:K02275,ko:K02305,ko:K02826,ko:K08738	ko00190,ko00910,ko00920,ko01100,ko01120,ko01524,ko02020,ko04115,ko04210,ko04214,ko04215,ko04932,ko05010,ko05012,ko05014,ko05016,ko05134,ko05145,ko05152,ko05161,ko05164,ko05167,ko05168,ko05200,ko05210,ko05222,ko05416,map00190,map00910,map00920,map01100,map01120,map01524,map02020,map04115,map04210,map04214,map04215,map04932,map05010,map05012,map05014,map05016,map05134,map05145,map05152,map05161,map…	M00155,M00416,M00529,M00595	R00081,R00294,R09492,R10151	RC00016,RC00819,RC02794,RC03151,RC03152	ko00000,ko00001,ko00002,ko01000	3.D.4.1,3.D.4.10,3.D.4.2,3.D.4.4,3.D.4.6	-	-	COX2,COX2_TM,Cytochrom_C,Cytochrome_CBB3	operon0127	operon0039							1.55321	1.61326	1.49579	0.00493119	0.00256574	4.78373e-05	TRUE	-1.21881	-1.03267	-0.968374	0.000364957	0.00195806	0.000182634	FALSE	51.8062
agat-gene-196	paeni_NIB01_000201	214789	215109	-		protein_coding	integral component of membrane|0016021||IEA			GO:0016021	cytochrome C oxidase subunit IV family protein		cytochrome C oxidase subunit IV	ctaF	GO:0005575,GO:0005623,GO:0005886,GO:0016020,GO:0044464,GO:0071944	1.10.3.12,1.9.3.1	ko:K02277,ko:K02829	ko00190,ko01100,map00190,map01100	M00155,M00416	R09492	RC00819	ko00000,ko00001,ko00002,ko01000	3.D.4.4	-	iYO844.BSU14920	COX4_pro	operon0127	operon0039							1.99448	2.12427	2.06892	5.14426e-05	3.51806e-05	3.55598e-15	TRUE	NA	NA	NA	NA	NA	NA	#VALUE!	14.7185
agat-gene-194	paeni_NIB01_000199	213259	213723	-		protein_coding					DUF420 domain-containing protein		membrane	-	-	-	ko:K08976	-	-	-	-	ko00000	-	-	-	DUF420	operon0127	operon0039							1.63506	1.71915	1.67264	0.000183568	3.22158e-05	2.56324e-14	TRUE	NA	NA	NA	NA	NA	NA	#VALUE!	6.70665
agat-gene-200	paeni_NIB01_000205	219291	220052	-	map	protein_coding			cellular protein modification process|0006464||IEA	GO:0006464	type I methionyl aminopeptidase		generally Co(II) however activity has been shown for some methionine aminopeptidases with Zn, Fe, or Mn	map	GO:0000096,GO:0003674,GO:0003824,GO:0004177,GO:0005488,GO:0005506,GO:0005575,GO:0005622,GO:0005623,GO:0005737,GO:0005829,GO:0006082,GO:0006464,GO:0006508,GO:0006520,GO:0006555,GO:0006790,GO:0006807,GO:0008150,GO:0008152,GO:0008198,GO:0008233,GO:0008235,GO:0008237,GO:0008238,GO:0009066,GO:0009987,GO:0010467,GO:0016151,GO:0016485,GO:0016787,GO:0019538,GO:0019752,GO:0030145,GO:0035551,GO:0036211,GO:…	3.4.11.18	ko:K01265	-	-	-	-	ko00000,ko01000,ko01002	-	-	-	Peptidase_M24,SEC-C	operon0128								1.29213	1.27547	1.23043	0.000379928	0.000567115	3.33129e-09	TRUE	-0.301364	-0.247272	-0.225863	0.150733	0.298854	0.313102	FALSE	4.55319
agat-gene-201	paeni_NIB01_000206	220287	220475	-		protein_coding					hypothetical protein		-	M1-751	-	-	-	-	-	-	-	-	-	-	-	-	operon0129								3.28662	3.2144	3.18924	4.1404e-09	5.07624e-08	1.33763e-110	TRUE	0.202377	0.151645	0.117918	0.102648	0.33109	0.443866	FALSE	162.935
agat-gene-202	paeni_NIB01_000207	220874	221155	+		protein_coding					transposase		-	M1-748	-	-	-	-	-	-	-	-	-	-	-	-	operon0130								1.88407	1.9364	NA	0.0100015	0.0115051	NA	#VALUE!	NA	NA	NA	NA	NA	NA	#VALUE!	0.716909
agat-gene-203	paeni_NIB01_000208	221309	221647	+		protein_coding					hypothetical protein		membrane	M1-746	-	-	-	-	-	-	-	-	-	-	-	DUF4870	operon0131								0.570189	0.786929	NA	0.36056	0.194426	NA	#VALUE!	NA	NA	NA	NA	NA	NA	#VALUE!	0.798997
agat-gene-204	paeni_NIB01_000209	221961	223322	-		protein_coding					purine permease		xanthine permease	pbuX	GO:0003674,GO:0005215,GO:0005345,GO:0005575,GO:0005623,GO:0005886,GO:0005887,GO:0006810,GO:0006863,GO:0008150,GO:0015205,GO:0015851,GO:0016020,GO:0016021,GO:0022857,GO:0031224,GO:0031226,GO:0042906,GO:0042907,GO:0044425,GO:0044459,GO:0044464,GO:0051179,GO:0051234,GO:0055085,GO:0071702,GO:0071705,GO:0071944,GO:0072530,GO:1904823	-	ko:K03458,ko:K16169	-	-	-	-	ko00000,ko02000	2.A.40,2.A.40.3.1	-	iSB619.SA_RS02140	Xan_ur_permease	operon0132	operon0040							2.46827	2.30722	2.23435	0.000240877	8.48061e-05	4.15155e-12	TRUE	0.346232	0.409103	0.34043	0.0362834	0.0626519	0.0757938	FALSE	29.7326
agat-gene-205	paeni_NIB01_000210	223324	223911	-		protein_coding		pentosyltransferase activity|0016763||IEA	purine-containing compound salvage|0043101||IEA, xanthine metabolic process|0046110||IEA	GO:0043101, GO:0046110, GO:0016763	xanthine phosphoribosyltransferase		Converts the preformed base xanthine, a product of nucleic acid breakdown, to xanthosine 5'-monophosphate (XMP), so it can be reused for RNA or DNA synthesis	xpt	-	2.4.2.22,2.4.2.7	ko:K00759,ko:K03816	ko00230,ko01100,ko01110,map00230,map01100,map01110	-	R00190,R01229,R02142,R04378	RC00063,RC00122	ko00000,ko00001,ko01000,ko04147	-	-	iYO844.BSU22070	Pribosyltran	operon0132	operon0040							2.83125	2.68468	2.60637	0.000193921	4.78056e-05	1.26859e-14	TRUE	0.35655	0.312377	0.25637	0.0251945	0.0793446	0.158096	FALSE	12.8086
agat-gene-206	paeni_NIB01_000211	224582	225076	+	mscL	protein_coding	integral component of membrane|0016021||IEA	mechanosensitive ion channel activity|0008381||IEA	ion transmembrane transport|0034220||IEA	GO:0034220, GO:0008381, GO:0016021	large conductance mechanosensitive channel protein MscL		Channel that opens in response to stretch forces in the membrane lipid bilayer. May participate in the regulation of osmotic pressure changes within the cell	mscL	GO:0003674,GO:0005215,GO:0005575,GO:0006810,GO:0006811,GO:0006884,GO:0008150,GO:0008361,GO:0008381,GO:0009987,GO:0009992,GO:0015267,GO:0016020,GO:0016021,GO:0016043,GO:0019725,GO:0022803,GO:0022836,GO:0022857,GO:0030104,GO:0031224,GO:0032535,GO:0042592,GO:0044425,GO:0048878,GO:0051179,GO:0051234,GO:0055082,GO:0055085,GO:0065007,GO:0065008,GO:0071840,GO:0090066	-	ko:K03282	-	-	-	-	ko00000,ko02000	1.A.22.1	-	-	MscL	operon0133								-2.22158	-2.22581	-2.20626	8.58502e-06	4.17926e-06	3.45614e-28	TRUE	0.798395	0.810946	0.744722	3.55124e-05	0.000797159	1.0705e-05	FALSE	153.848
agat-gene-207	paeni_NIB01_000212	225358	225660	-		protein_coding					hypothetical protein		-	M1-741	-	-	-	-	-	-	-	-	-	-	-	-	operon0134								2.18828	2.17064	2.12705	3.44992e-06	1.30486e-05	2.20892e-18	TRUE	0.479552	0.541703	0.487611	0.00151616	0.00436762	0.000937834	FALSE	16.9267
agat-gene-208	paeni_NIB01_000213	225740	226447	+		protein_coding		hydrolase activity|0016787||IEA		GO:0016787	NUDIX domain-containing protein		Nudix hydrolase	M1-740	-	-	-	-	-	-	-	-	-	-	-	NUDIX	operon0135								0.437108	0.329916	0.302703	0.049555	0.0864186	0.0858616	FALSE	1.00889	1.06692	1.01137	3.55334e-06	7.00427e-05	2.93233e-11	TRUE	26.3915
agat-gene-209	paeni_NIB01_000214	226618	227409	-		protein_coding			regulation of transcription, DNA-templated|0006355||IEA	GO:0006355	MarR family transcriptional regulator		transcriptional	yrhO1	-	-	-	-	-	-	-	-	-	-	-	Regulator_TrmB,TrmB	operon0136	operon0041							-0.113412	-0.183851	-0.192422	0.357859	0.204705	0.191267	FALSE	0.176811	0.298261	0.233366	0.299902	0.178477	0.245499	FALSE	197.831
agat-gene-210	paeni_NIB01_000215	227478	228269	-		protein_coding					zinc ribbon domain-containing protein		-	M1-737	-	-	-	-	-	-	-	-	-	-	-	zinc_ribbon_2	operon0137	operon0041							-0.204227	-0.272558	-0.282657	0.135116	0.100764	0.065166	FALSE	0.350467	0.336982	0.272488	0.0330121	0.105644	0.152003	FALSE	157.019
agat-gene-211	paeni_NIB01_000216	228616	231297	+		protein_coding		ATP binding|0005524||IEA		GO:0005524	UvrD-helicase domain-containing protein		DNA helicase	yjcD	-	3.6.4.12	ko:K03657	ko03420,ko03430,map03420,map03430	-	-	-	ko00000,ko00001,ko01000,ko03400	-	-	-	UvrD-helicase,UvrD_C,YdjO	operon0138								-2.51827	-2.49022	-2.48557	1.84158e-07	1.57895e-07	3.29104e-73	TRUE	-0.477439	-0.593988	-0.563961	0.00385701	0.0114825	0.0035107	FALSE	321.134
agat-gene-212	paeni_NIB01_000217	231414	231782	+		protein_coding					hypothetical protein		-	-	-	-	-	-	-	-	-	-	-	-	-	-	operon0139								6.89092	6.91153	6.89464	3.74387e-09	1.02299e-08	2.02398e-265	TRUE	-0.900957	-0.876162	-0.804983	5.93421e-05	0.00854837	0.00110974	FALSE	2.71714
agat-gene-213	paeni_NIB01_000218	231987	233027	+		protein_coding					zinc-binding alcohol dehydrogenase family protein		Belongs to the zinc-containing alcohol dehydrogenase family. Quinone oxidoreductase subfamily	qor	-	1.1.1.1,1.6.5.5	ko:K00001,ko:K00344	ko00010,ko00071,ko00350,ko00625,ko00626,ko00830,ko00980,ko00982,ko01100,ko01110,ko01120,ko01130,ko01220,map00010,map00071,map00350,map00625,map00626,map00830,map00980,map00982,map01100,map01110,map01120,map01130,map01220	-	R00623,R00754,R02124,R04805,R04880,R05233,R05234,R06917,R06927,R07105,R08281,R08306,R08310	RC00050,RC00087,RC00088,RC00099,RC00116,RC00649,RC01734,RC02273	ko00000,ko00001,ko01000	-	-	-	ADH_N,ADH_zinc_N,ADH_zinc_N_2	operon0140								0.55869	0.641384	0.597419	0.0474734	0.0402782	0.029279	FALSE	-0.50251	-0.480837	-0.452873	0.0021035	0.0334199	0.0187718	FALSE	26.698
agat-gene-214	paeni_NIB01_000219	233142	234212	-		protein_coding					Gfo/Idh/MocA family oxidoreductase		Oxidoreductase	-	-	-	-	-	-	-	-	-	-	-	-	GFO_IDH_MocA,GFO_IDH_MocA_C	operon0141	operon0042							-0.527037	-0.583288	-0.593576	0.00448426	0.00163321	9.81497e-06	FALSE	0.1285	0.214652	0.169176	0.379297	0.209572	0.328621	FALSE	73.5406
agat-gene-215	paeni_NIB01_000220	234251	234727	-		protein_coding					GNAT family N-acetyltransferase		Acetyltransferase (GNAT) family	-	-	2.3.1.128	ko:K03789	-	-	-	-	ko00000,ko01000,ko03009	-	-	-	Acetyltransf_1	operon0141	operon0042							0.391135	0.363285	0.336982	0.0643895	0.0616954	0.0643911	FALSE	0.0311477	0.0762731	0.0424694	0.869835	0.700816	0.852487	FALSE	35.1887
agat-gene-216	paeni_NIB01_000221	235023	236084	+		protein_coding					copper amine oxidase N-terminal domain-containing protein		-	-	-	-	-	-	-	-	-	-	-	-	-	Cu_amine_oxidN1	operon0142								6.83431	6.87594	6.86045	2.97794e-09	1.24686e-08	1.38895e-243	TRUE	-0.639229	-0.749582	-0.660521	0.00649273	0.0257046	0.00982029	FALSE	21.4471
agat-gene-217	paeni_NIB01_000222	236251	236673	-		protein_coding					RidA family protein		Endoribonuclease L-PSP	-	-	4.2.99.21	ko:K04782	ko01053,ko01110,ko01130,map01053,map01110,map01130	-	R06602	RC01549,RC02148	ko00000,ko00001,ko01000	-	-	-	Aldo_ket_red,Ribonuc_L-PSP	operon0143								0.597075	0.321977	0.281679	0.108067	0.287721	0.317364	FALSE	0.756325	0.973366	0.762355	0.0234998	0.025086	0.0172152	FALSE	9.21583
agat-gene-218	paeni_NIB01_000223	236894	237865	-		protein_coding					M15 family metallopeptidase		Peptidase M15B and M15C DD-carboxypeptidase VanY endolysin	vanY	-	3.4.16.4,3.4.17.14	ko:K01286,ko:K07260	ko00550,ko01100,ko01502,ko02020,map00550,map01100,map01502,map02020	M00651	-	-	ko00000,ko00001,ko00002,ko01000,ko01002,ko01011,ko01504	-	-	-	VanY	operon0144								-1.7541	-1.6686	-1.63189	6.83334e-06	4.57769e-05	2.0651e-14	TRUE	-0.89929	-1.01275	-0.967852	6.4726e-05	0.00130045	1.2658e-05	FALSE	233.408
agat-gene-219	paeni_NIB01_000224	238184	239005	-		protein_coding					hypothetical protein		-	M1-706	-	-	-	-	-	-	-	-	-	-	-	-	operon0145								-2.09073	-2.11753	-2.09206	1.55745e-05	8.70357e-06	1.27355e-24	TRUE	-1.07822	-1.33938	-1.28896	0.000192111	0.000472348	1.79215e-07	TRUE	123.396
agat-gene-220	paeni_NIB01_000225	239252	242455	-		protein_coding					DEAD/DEAH box helicase		helicase	helZ	-	2.7.11.1	ko:K08282	-	-	-	-	ko00000,ko01000	-	-	-	DUF3670,Helicase_C,SNF2_N	operon0146								-2.7034	-2.64687	-2.63074	3.47615e-07	1.6919e-06	5.71527e-36	TRUE	-0.146072	-0.333143	-0.304576	0.422601	0.173818	0.157225	FALSE	624.047
agat-gene-221	paeni_NIB01_000226	242740	243192	-		protein_coding			signal transduction|0007165||IEA	GO:0007165	chemotaxis protein CheW		Chemotaxis protein CheW	cheW2	-	-	ko:K03408	ko02020,ko02030,map02020,map02030	-	-	-	ko00000,ko00001,ko02035	-	-	-	CheW	operon0147								-2.13738	-2.26039	-2.22373	0.000819351	6.45276e-05	6.89963e-14	TRUE	-0.239755	-0.0262379	-0.03798	0.375263	0.93249	0.894093	FALSE	17.3043
agat-gene-223	paeni_NIB01_000228	244408	245385	-		protein_coding					ABC transporter ATP-binding protein		Belongs to the ABC transporter superfamily	oppD	-	-	ko:K02031,ko:K02032	ko02024,map02024	M00239	-	-	ko00000,ko00001,ko00002,ko02000	3.A.1.5	-	-	ABC_tran,oligo_HPY	operon0148	operon0043							0.231094	0.198339	0.164082	0.43546	0.482738	0.523878	FALSE	NA	NA	NA	NA	NA	NA	#VALUE!	5.27557
agat-gene-226	paeni_NIB01_000231	248727	249602	-		protein_coding					ABC transporter permease		ABC transporter permease	dppCch3	-	-	ko:K02034	ko02024,map02024	M00239	-	-	ko00000,ko00001,ko00002,ko02000	3.A.1.5	-	-	BPD_transp_1,OppC_N	operon0148	operon0044							0.5503	0.534873	NA	0.311839	0.323033	NA	#VALUE!	NA	NA	NA	NA	NA	NA	#VALUE!	2.93331
agat-gene-227	paeni_NIB01_000232	249654	250664	-		protein_coding					ABC transporter permease		ABC transporter permease	MA20_22705	-	-	ko:K02033	ko02024,map02024	M00239	-	-	ko00000,ko00001,ko00002,ko02000	3.A.1.5	-	-	BPD_transp_1	operon0148	operon0044							0.78013	0.625407	0.579029	0.0302429	0.0302032	0.0218848	FALSE	NA	NA	NA	NA	NA	NA	#VALUE!	3.71315
agat-gene-225	paeni_NIB01_000230	246879	248462	-		protein_coding					ABC transporter substrate-binding protein		ABC transporter substrate-binding protein	-	-	-	ko:K02035	ko02024,map02024	M00239	-	-	ko00000,ko00001,ko00002,ko02000	3.A.1.5	-	-	SBP_bac_5	operon0148	operon0043							0.395667	0.34227	0.298066	0.232728	0.350325	0.306624	FALSE	NA	NA	NA	NA	NA	NA	#VALUE!	3.99499
agat-gene-224	paeni_NIB01_000229	245446	246783	-		protein_coding		hydrolase activity|0016787||IEA		GO:0016787	ArgE/DapE family deacylase		succinyl-diaminopimelate desuccinylase	-	-	3.5.1.18	ko:K01439	ko00300,ko01100,ko01120,ko01230,map00300,map01100,map01120,map01230	M00016	R02734	RC00064,RC00090	ko00000,ko00001,ko00002,ko01000	-	-	-	M20_dimer,Peptidase_M20,Peptidase_M28	operon0148	operon0043							0.553911	0.52931	0.47342	0.116266	0.174605	0.137994	FALSE	NA	NA	NA	NA	NA	NA	#VALUE!	5.88303
agat-gene-222	paeni_NIB01_000227	243449	244411	-		protein_coding		ATP binding|0005524||IEA	peptide transport|0015833||IEA	GO:0015833, GO:0005524	dipeptide ABC transporter ATP-binding protein		Belongs to the ABC transporter superfamily	-	-	-	ko:K02032,ko:K10823	ko01501,ko02010,ko02024,map01501,map02010,map02024	M00239,M00439	-	-	ko00000,ko00001,ko00002,ko02000	3.A.1.5,3.A.1.5.1,3.A.1.5.18,3.A.1.5.19,3.A.1.5.25	-	-	ABC_tran,oligo_HPY	operon0148	operon0043							0.538247	0.475704	0.44822	0.057909	0.0891041	0.0349106	FALSE	NA	NA	NA	NA	NA	NA	#VALUE!	5.55467
agat-gene-228	paeni_NIB01_000233	250977	252509	-		protein_coding					PucR family transcriptional regulator ligand-binding domain-containing protein		Polyketide synthase regulator	pucR	-	-	ko:K09684	-	-	-	-	ko00000,ko03000	-	-	-	GAF_2,HTH_30,PucR	operon0149								-0.58128	-0.697646	-0.676524	0.0938903	0.0497877	0.0127779	FALSE	0.219062	0.252756	0.167221	0.467708	0.450293	0.535472	FALSE	12.0862
agat-gene-229	paeni_NIB01_000234	252906	253538	-		protein_coding			nitrogen compound metabolic process|0006807||IEA	GO:0006807	aspartate/glutamate racemase family protein		Hydantoin racemase	hyuE	-	5.1.99.3	ko:K16841	ko00230,ko01120,map00230,map01120	-	R03925	RC01027	ko00000,ko00001,ko01000	-	-	-	Asp_Glu_race	operon0150								1.40043	1.52452	1.46785	0.00132182	0.000415919	1.01369e-07	TRUE	0.11534	0.105826	0.0679052	0.508222	0.62459	0.755765	FALSE	15.1536
agat-gene-230	paeni_NIB01_000235	253768	254718	-		protein_coding			proteolysis|0006508||IEA	GO:0006508	aminopeptidase		aminopeptidase	-	-	-	-	-	-	-	-	-	-	-	-	Peptidase_M29	operon0151	operon0045							0.776351	0.960724	0.909677	0.0310289	0.00576381	0.000813129	FALSE	0.00554019	-0.0142753	-0.0369876	0.962989	0.926261	0.814509	FALSE	23.762
agat-gene-231	paeni_NIB01_000236	254738	255409	-		protein_coding					AroM family protein		AroM protein	aroM	-	-	ko:K14591	-	-	-	-	ko00000	-	-	-	AroM	operon0151	operon0045							0.374737	0.32873	0.30642	0.139715	0.154682	0.189199	FALSE	NA	NA	0.373238	NA	NA	0.197467	#VALUE!	4.14001
agat-gene-232	paeni_NIB01_000237	255506	256456	-		protein_coding					DUF1177 domain-containing protein		Protein of unknown function (DUF1177)	-	-	-	-	-	-	-	-	-	-	-	-	DUF1177	operon0152	operon0045							0.412013	0.412473	0.35966	0.0905215	0.0887979	0.0794224	FALSE	0.565839	0.545775	0.398064	0.0606305	0.101363	0.148239	FALSE	4.96637
agat-gene-233	paeni_NIB01_000238	256697	257083	-		protein_coding					hypothetical protein		Male sterility protein	hetM	-	-	ko:K07003	-	-	-	-	ko00000	-	-	-	Abhydrolase_1,Abhydrolase_6,NAD_binding_4	operon0153								2.86876	2.83827	2.71945	6.9558e-05	0.000163592	1.68562e-11	TRUE	NA	NA	NA	NA	NA	NA	#VALUE!	0.311937
agat-gene-234	paeni_NIB01_000239	257522	258820	-		protein_coding					ABC transporter substrate-binding protein		ABC transporter substrate-binding protein	msmE1	-	-	ko:K10117	ko02010,map02010	M00196	-	-	ko00000,ko00001,ko00002,ko02000	3.A.1.1.28	-	-	SBP_bac_8	operon0154								5.8385	5.90517	5.8861	6.35475e-09	1.53194e-08	3.54228e-201	TRUE	0.230952	0.198726	0.14927	0.171719	0.290712	0.450685	FALSE	15.7063
agat-gene-235	paeni_NIB01_000240	259554	260390	-		protein_coding					carbohydrate ABC transporter permease		Sugar ABC transporter permease	amyC1	-	-	ko:K10119	ko02010,map02010	M00196	-	-	ko00000,ko00001,ko00002,ko02000	3.A.1.1.28	-	-	BPD_transp_1	operon0155	operon0046							5.16064	5.28971	5.27051	6.8127e-09	2.58299e-08	1.24618e-168	TRUE	NA	NA	NA	NA	NA	NA	#VALUE!	5.69422
agat-gene-236	paeni_NIB01_000241	260391	261272	-		protein_coding					sugar ABC transporter permease		ABC transporter permease	amyD1	-	-	ko:K10118,ko:K15771	ko02010,map02010	M00196,M00491	-	-	ko00000,ko00001,ko00002,ko02000	3.A.1.1.16,3.A.1.1.2,3.A.1.1.28	-	-	BPD_transp_1	operon0155	operon0046							4.69122	4.69917	4.66742	1.51745e-07	1.49473e-07	1.38939e-80	TRUE	-0.750474	-0.861605	-0.752546	0.0150452	0.019818	0.00825717	FALSE	5.94049
agat-gene-238	paeni_NIB01_000243	263248	264879	+		protein_coding			phosphorelay signal transduction system|0000160||IEA	GO:0000160	response regulator		Response regulator containing CheY-like receiver domain and AraC-type DNA-binding domain	ntrC	-	-	ko:K07720	ko02020,map02020	M00519	-	-	ko00000,ko00001,ko00002,ko02022	-	-	-	HTH_18,Response_reg,TniQ	operon0156	operon0047							-0.0410251	0.0678374	0.0420743	0.824279	0.72078	0.820473	FALSE	-0.0395133	-0.114152	-0.120581	0.833805	0.584808	0.560004	FALSE	27.7214
agat-gene-237	paeni_NIB01_000242	261416	263242	+		protein_coding					sensor histidine kinase		Histidine kinase	-	-	2.7.13.3	ko:K07718	ko02020,map02020	M00519	-	-	ko00000,ko00001,ko00002,ko01000,ko01001,ko02022	-	-	-	HAMP,HATPase_c,His_kinase,dCache_1	operon0156	operon0047							-0.178676	-0.0782847	-0.0828813	0.305745	0.669251	0.637414	FALSE	-0.167562	-0.349389	-0.322183	0.458301	0.135502	0.129179	FALSE	21.2583
agat-gene-239	paeni_NIB01_000244	265050	265997	-		protein_coding					bile acid:sodium symporter		Sodium Bile acid symporter family	-	-	-	-	-	-	-	-	-	-	-	-	SBF,SBF_like	operon0157								-1.45796	-1.51697	-1.51731	3.86494e-05	8.4301e-06	1.20679e-22	TRUE	0.796402	0.934993	0.815324	0.0022103	0.00366541	0.000975377	FALSE	43.2334
agat-gene-240	paeni_NIB01_000245	266703	267461	+		protein_coding					tryptophan-rich sensory protein		-	M1-693	-	-	-	-	-	-	-	-	-	-	-	TspO_MBR	operon0158								-0.290322	-0.298998	-0.299708	0.229656	0.249082	0.17276	FALSE	-0.527293	-0.560956	-0.533383	0.00104804	0.0135957	0.0044838	FALSE	16.4123
agat-gene-241	paeni_NIB01_000246	267561	267935	-		protein_coding					RidA family protein		endoribonuclease L-PSP	yhaR	-	3.5.99.10	ko:K09022	-	-	R11098,R11099	RC03275,RC03354	ko00000,ko01000	-	-	-	Ribonuc_L-PSP	operon0159								0.0681102	0.0227157	0.017118	0.612806	0.900737	0.94938	FALSE	0.636314	0.459749	0.371341	0.00180323	0.0805681	0.0930334	FALSE	282.574
agat-gene-243	paeni_NIB01_000248	268784	269941	-		protein_coding			transmembrane transport|0055085||IEA	GO:0055085	MFS transporter		MFS transporter	-	-	-	ko:K16210	-	-	-	-	ko00000,ko02000	2.A.2.5	-	-	MFS_1	operon0160	operon0048							-0.195848	-0.27528	-0.280036	0.301514	0.0978488	0.0939884	FALSE	-0.343593	-0.391857	-0.383579	0.0388981	0.0345941	0.0191831	FALSE	83.9659
agat-gene-242	paeni_NIB01_000247	268083	268763	-		protein_coding					oxidoreductase		nucleoside-diphosphate sugar epimerase	M1-688	-	-	-	-	-	-	-	-	-	-	-	Epimerase,HIM1,NAD_binding_10,Semialdhyde_dh	operon0160	operon0048							0.350079	0.249024	0.225255	0.20449	0.266783	0.32204	FALSE	-0.848294	-0.691472	-0.611175	0.00279362	0.0185957	0.016414	FALSE	29.7572
agat-gene-244	paeni_NIB01_000249	270150	271565	-		protein_coding					ATP-binding protein		Histidine kinase	phY1	-	2.7.13.3	ko:K03407	ko02020,ko02030,map02020,map02030	M00506	-	-	ko00000,ko00001,ko00002,ko01000,ko01001,ko02022,ko02035	-	-	-	5TM-5TMR_LYT,HATPase_c,HisKA	operon0161								-0.608134	-0.651143	-0.64727	0.00521265	0.00557537	0.000108421	FALSE	0.528667	0.637541	0.558142	0.00342727	0.00767965	0.00346215	FALSE	97.661
agat-gene-245	paeni_NIB01_000250	271798	272451	+		protein_coding					phosphatase PAP2 family protein		COG0671 Membrane-associated phospholipid phosphatase	-	-	-	-	-	-	-	-	-	-	-	-	PAP2_3	operon0162								-2.81868	-2.84913	-2.86245	7.69557e-06	1.77503e-06	2.39295e-37	TRUE	-0.91263	-0.956287	-0.930698	1.37464e-05	0.000591138	8.50062e-07	FALSE	79.9271
agat-gene-246	paeni_NIB01_000251	272444	273967	-		protein_coding					HD domain-containing protein		Chemotaxis protein CheY	rpfG	-	-	-	-	-	-	-	-	-	-	-	GAF_2,HD,HD_5	operon0163								-2.20605	-2.05829	-2.02102	2.79073e-05	2.12018e-05	5.36962e-17	TRUE	-1.19089	-1.05337	-0.924684	0.000567071	0.00988712	0.00209056	FALSE	65.9529
agat-gene-247	paeni_NIB01_000252	274209	275189	-		protein_coding	integral component of membrane|0016021||IEA			GO:0016021	anti-sigma factor		Anti-sigma-K factor rskA	-	-	-	-	-	-	-	-	-	-	-	-	RskA,zf-HC2	operon0164	operon0049							0.701497	0.769168	0.753431	0.00013514	0.000184234	2.19394e-11	FALSE	-0.820823	-0.935291	-0.916899	1.90466e-05	0.000409865	3.13845e-07	FALSE	59.7278
agat-gene-248	paeni_NIB01_000253	275186	275782	-		protein_coding		DNA binding|0003677||IEA, DNA-binding transcription factor activity|0003700||IEA, sigma factor activity|0016987||IEA	DNA-templated transcription, initiation|0006352||IEA, regulation of transcription, DNA-templated|0006355||IEA	GO:0006352, GO:0006355, GO:0003677, GO:0003700, GO:0016987	sigma-70 family RNA polymerase sigma factor		Belongs to the sigma-70 factor family. ECF subfamily	sigK_1	-	-	ko:K03088	-	-	-	-	ko00000,ko03021	-	-	-	Sigma70_r2,Sigma70_r4,Sigma70_r4_2	operon0164	operon0049							0.986849	1.13087	1.10346	0.000260833	0.000120026	1.01215e-09	FALSE	-0.419103	-0.466511	-0.424066	0.024696	0.0655185	0.0480424	FALSE	40.0867
agat-pseudogene-2	paeni_NIB01_000254	276360	276449	-		pseudogene					sporulation protein YjcZ	incomplete; partial on complete genome; missing N-terminus															operon0165								1.14202	1.1446	NA	0.0835929	0.0799172	NA	#VALUE!	NA	NA	NA	NA	NA	NA	#VALUE!	0.867405
agat-gene-249	paeni_NIB01_000255	276830	276940	-		protein_coding					YjcZ family sporulation protein		-	-	-	-	-	-	-	-	-	-	-	-	-	-	operon0166	operon0050							0.767917	0.0680714	NA	0.122068	0.945868	NA	#VALUE!	NA	NA	NA	NA	NA	NA	#VALUE!	0.279102
agat-gene-250	paeni_NIB01_000256	276985	277101	-		protein_coding					YjcZ family sporulation protein		-	-	-	-	-	-	-	-	-	-	-	-	-	-	operon0166	operon0050							1.36124	1.54257	NA	0.0582735	0.0277442	NA	#VALUE!	NA	NA	NA	NA	NA	NA	#VALUE!	0.462433
agat-gene-251	paeni_NIB01_000257	277309	277635	-		protein_coding					MTH1187 family thiamine-binding protein		Thiamine-binding protein	yqgV	GO:0005575,GO:0005622,GO:0005623,GO:0005737,GO:0005829,GO:0044424,GO:0044444,GO:0044464	-	-	-	-	-	-	-	-	-	-	DUF1385,Thiamine_BP	operon0167								0.641306	0.641126	0.621503	0.00206748	0.00269858	2.42281e-05	FALSE	0.747265	0.666248	0.602587	3.64874e-05	0.00165639	0.000157066	FALSE	70.6264
agat-gene-252	paeni_NIB01_000258	278395	280728	+		protein_coding		ribonucleoside-diphosphate reductase activity, thioredoxin disulfide as acceptor|0004748||IEA, ATP binding|0005524||IEA	DNA replication|0006260||IEA	GO:0006260, GO:0004748, GO:0005524	ribonucleoside-diphosphate reductase subunit alpha		Provides the precursors necessary for DNA synthesis. Catalyzes the biosynthesis of deoxyribonucleotides from the corresponding ribonucleotides	nrdA	-	1.17.4.1	ko:K00525	ko00230,ko00240,ko01100,map00230,map00240,map01100	M00053	R02017,R02018,R02019,R02024	RC00613	ko00000,ko00001,ko00002,ko01000,ko03400	-	-	-	ATP-cone,Ribonuc_red_lgC,Ribonuc_red_lgN	operon0168								-3.1964	-3.10521	-3.09831	6.91197e-08	1.27688e-07	5.46885e-85	TRUE	-0.503966	-0.566621	-0.564534	0.000519354	0.00263163	8.82047e-05	FALSE	967.556
agat-gene-253	paeni_NIB01_000259	280937	281968	+		protein_coding		oxidoreductase activity|0016491||IEA	deoxyribonucleotide biosynthetic process|0009263||IEA	GO:0009263, GO:0016491	ribonucleotide-diphosphate reductase subunit beta		Provides the precursors necessary for DNA synthesis. Catalyzes the biosynthesis of deoxyribonucleotides from the corresponding ribonucleotides	nrdB	-	1.17.4.1	ko:K00526	ko00230,ko00240,ko01100,map00230,map00240,map01100	M00053	R02017,R02018,R02019,R02024	RC00613	ko00000,ko00001,ko00002,ko01000,ko03400	-	-	-	Ribonuc_red_sm	operon0168								-2.33578	-2.25327	-2.24562	2.14826e-06	3.70499e-07	6.79951e-50	TRUE	-0.886873	-1.05815	-1.04019	4.00852e-05	0.000229896	1.95687e-08	FALSE	176.444
agat-gene-255	paeni_NIB01_000261	283167	284204	+		protein_coding					aminoglycoside phosphotransferase family protein		Phosphotransferase enzyme family	-	-	-	-	-	-	-	-	-	-	-	-	APH	operon0169	operon0051							0.139423	0.170065	0.129758	0.396258	0.364251	0.420214	FALSE	0.263582	0.274483	0.223144	0.0842678	0.115941	0.21056	FALSE	20.4292
agat-gene-254	paeni_NIB01_000260	282175	283149	+		protein_coding					SMI1/KNR4 family protein		Cell wall assembly	-	-	-	-	-	-	-	-	-	-	-	-	DUF2185,DUF4253,DUF4261,Imm51,Imm68,SUFU,SUKH_6,TPR_2	operon0169	operon0051							0.33169	0.27462	0.252743	0.0533849	0.128255	0.0684966	FALSE	0.00295982	0.00975819	-0.0150363	0.984493	0.959591	0.94282	FALSE	24.9796
agat-gene-256	paeni_NIB01_000262	284297	286108	-		protein_coding					S9 family peptidase		COG1506 Dipeptidyl aminopeptidases acylaminoacyl-peptidases	-	-	-	-	-	-	-	-	-	-	-	-	PD40,Peptidase_S9,Peptidase_S9_N	operon0170								-0.741288	-0.939536	-0.917611	0.0334195	0.00260512	8.07886e-05	FALSE	0.673167	0.523009	0.381634	0.0271409	0.125712	0.165366	FALSE	51.5928
agat-gene-257	paeni_NIB01_000263	286231	286938	-		protein_coding		holo-[acyl-carrier-protein] synthase activity|0008897||IEA		GO:0008897	4'-phosphopantetheinyl transferase superfamily protein		Belongs to the P-Pant transferase superfamily	hetI	-	2.7.8.7	ko:K00997,ko:K06133	ko00770,map00770	-	R01625	RC00002	ko00000,ko00001,ko01000	-	-	-	ACPS	operon0171	operon0052							-1.11834	-1.11794	-1.04721	0.00567842	0.0031104	0.00206425	TRUE	NA	NA	NA	NA	NA	NA	#VALUE!	4.20295
agat-gene-268	paeni_NIB01_000274	297913	298173	-		protein_coding					acyl carrier protein		Phosphopantetheine attachment site	asbD	-	-	ko:K02078	-	-	-	-	ko00000,ko00001	-	-	-	PP-binding	operon0172	operon0052							-1.58556	-3.17426	NA	0.00166727	0.00794407	NA	#VALUE!	NA	NA	NA	NA	NA	NA	#VALUE!	0.777107
agat-gene-264	paeni_NIB01_000270	294155	295312	-		protein_coding					acyl-CoA/acyl-ACP dehydrogenase		Acyl-CoA dehydrogenase, middle domain	-	-	1.3.8.7	ko:K00249	ko00071,ko00280,ko00410,ko00640,ko01100,ko01110,ko01130,ko01200,ko01212,ko03320,map00071,map00280,map00410,map00640,map01100,map01110,map01130,map01200,map01212,map03320	M00013,M00036,M00087	R00924,R01175,R01279,R02661,R03172,R03777,R03857,R03990,R04095,R04432,R04751,R04754	RC00052,RC00068,RC00076,RC00095,RC00148,RC00246	ko00000,ko00001,ko00002,ko01000	-	-	-	Acyl-CoA_dh_1,Acyl-CoA_dh_M,Acyl-CoA_dh_N	operon0172	operon0052							-0.366978	-0.0396606	NA	0.380599	0.918613	NA	#VALUE!	NA	NA	NA	NA	NA	NA	#VALUE!	2.8047
agat-gene-261	paeni_NIB01_000267	290583	291764	-		protein_coding					arginase family protein		Arginase family	speB	-	3.5.3.11	ko:K01480	ko00330,ko01100,map00330,map01100	M00133	R01157	RC00024,RC00329	ko00000,ko00001,ko00002,ko01000	-	-	-	Arginase	operon0172	operon0052							-0.449659	-0.593792	-0.567487	0.180809	0.0968739	0.0494078	FALSE	NA	NA	-1.12272	NA	NA	0.00381233	#VALUE!	4.53951
agat-gene-270	paeni_NIB01_000276	299479	300867	-		protein_coding					ATP-grasp domain-containing protein		ATP-grasp domain	-	-	-	-	-	-	-	-	-	-	-	-	AAA_30,ATP-grasp,ATP-grasp_3,MobA_MobL	operon0172	operon0052							-0.918696	-0.769477	NA	0.113229	0.163019	NA	#VALUE!	NA	NA	NA	NA	NA	NA	#VALUE!	3.73504
agat-gene-269	paeni_NIB01_000275	298192	299478	-	lysA	protein_coding		diaminopimelate decarboxylase activity|0008836||IEA	lysine biosynthetic process via diaminopimelate|0009089||IEA	GO:0009089, GO:0008836	diaminopimelate decarboxylase		Belongs to the Orn Lys Arg decarboxylase class-II family	-	-	4.1.1.20	ko:K01586	ko00300,ko01100,ko01110,ko01120,ko01130,ko01230,map00300,map01100,map01110,map01120,map01130,map01230	M00016,M00525,M00526,M00527	R00451	RC00299	ko00000,ko00001,ko00002,ko01000	-	-	-	Orn_Arg_deC_N,Orn_DAP_Arg_deC	operon0172	operon0052							-0.369149	-0.325161	-0.307744	0.301768	0.324957	0.279775	FALSE	NA	NA	NA	NA	NA	NA	#VALUE!	4.67632
agat-gene-260	paeni_NIB01_000266	289606	290586	-		protein_coding					hypothetical protein		Kdo2-lipid A biosynthetic process	-	-	-	-	-	-	-	-	-	-	-	-	Lip_A_acyltrans	operon0172	operon0052							-0.102744	-0.230382	-0.234779	0.704584	0.388578	0.393744	FALSE	NA	NA	NA	NA	NA	NA	#VALUE!	4.20568
agat-gene-267	paeni_NIB01_000273	297035	297868	-		protein_coding					hypothetical protein		Catalyzes the condensation reaction of fatty acid synthesis by the addition to an acyl acceptor of two carbons from malonyl-ACP. Catalyzes the first condensation reaction which initiates fatty acid synthesis and may therefore play a role in governing the total rate of fatty acid production. Possesses both acetoacetyl-ACP synthase and acetyl transacylase activities. Its substrate specificity deter…	-	-	2.3.1.180,2.3.1.41	ko:K00647,ko:K00648	ko00061,ko00780,ko01100,ko01212,map00061,map00780,map01100,map01212	M00082,M00083,M00572	R04355,R04726,R04952,R04957,R04960,R04963,R04968,R07762,R10115,R10119,R10707	RC00004,RC00039,RC02728,RC02729,RC02888	ko00000,ko00001,ko00002,ko01000,ko01004	-	-	-	ACP_syn_III,ACP_syn_III_C,Haem_oxygenas_2	operon0172	operon0052							-0.872971	-0.590942	NA	0.14822	0.337555	NA	#VALUE!	NA	NA	NA	NA	NA	NA	#VALUE!	2.46814
agat-gene-266	paeni_NIB01_000272	296072	297016	-		protein_coding					hypothetical protein		3-Oxoacyl-[acyl-carrier-protein (ACP)] synthase III C terminal	-	-	2.3.1.180	ko:K00648	ko00061,ko01100,ko01212,map00061,map01100,map01212	M00082,M00083	R10707	RC00004,RC02729,RC02888	ko00000,ko00001,ko00002,ko01000,ko01004	-	-	-	ACP_syn_III,ACP_syn_III_C	operon0172	operon0052							0.085906	0.120568	0.107988	0.805127	0.704839	0.718842	FALSE	NA	NA	NA	NA	NA	NA	#VALUE!	2.76913
agat-gene-271	paeni_NIB01_000277	300806	301816	-		protein_coding					hypothetical protein		3-Oxoacyl-[acyl-carrier-protein (ACP)] synthase III C terminal	-	-	2.3.1.180	ko:K00648	ko00061,ko01100,ko01212,map00061,map01100,map01212	M00082,M00083	R10707	RC00004,RC02729,RC02888	ko00000,ko00001,ko00002,ko01000,ko01004	-	-	-	ACP_syn_III,ACP_syn_III_C	operon0172	operon0052							-0.172994	-0.0730542	-0.0787354	0.67876	0.814918	0.787907	FALSE	NA	NA	NA	NA	NA	NA	#VALUE!	5.97059
agat-gene-263	paeni_NIB01_000269	293194	294162	-		protein_coding					hypothetical protein		-	-	-	-	-	-	-	-	-	-	-	-	-	-	operon0172	operon0052							-1.4627	-1.20388	NA	0.0190806	0.0244094	NA	#VALUE!	NA	NA	NA	NA	NA	NA	#VALUE!	4.51215
agat-gene-265	paeni_NIB01_000271	295309	296043	-		protein_coding					hypothetical protein		-	-	-	-	-	-	-	-	-	-	-	-	-	-	operon0172	operon0052							0.294929	0.178141	0.146655	0.291508	0.529453	0.649311	FALSE	NA	NA	NA	NA	NA	NA	#VALUE!	1.85794
agat-gene-258	paeni_NIB01_000264	287043	288266	-		protein_coding					insulinase family protein		Insulinase (Peptidase family M16)	-	-	-	-	-	-	-	-	-	-	-	-	Peptidase_M16,Peptidase_M16_C	operon0172	operon0052							-1.27445	-1.16299	NA	0.0186917	0.0122006	NA	#VALUE!	NA	NA	NA	NA	NA	NA	#VALUE!	6.82158
agat-gene-259	paeni_NIB01_000265	288282	289583	-		protein_coding					insulinase family protein		Peptidase M16 inactive domain	ymfF	-	-	ko:K07263	-	-	-	-	ko00000,ko01000,ko01002	-	-	-	Peptidase_M16_C,Relaxase	operon0172	operon0052							0.702124	0.66335	0.611058	0.0471179	0.0490129	0.020514	FALSE	NA	NA	NA	NA	NA	NA	#VALUE!	6.14298
agat-gene-262	paeni_NIB01_000268	291792	293174	-		protein_coding	membrane|0016020||IEA			GO:0016020	MATE family efflux transporter		drug transmembrane transporter activity	-	-	-	-	-	-	-	-	-	-	-	-	MatE	operon0172	operon0052							-0.58584	-0.550082	-0.527418	0.191544	0.192945	0.103953	FALSE	NA	NA	NA	NA	NA	NA	#VALUE!	6.00343
agat-gene-272	paeni_NIB01_000278	301929	302180	-		protein_coding					hypothetical protein																operon0173								0.556701	0.724331	0.659256	0.230018	0.0462537	0.0300767	FALSE	NA	NA	NA	NA	NA	NA	#VALUE!	7.585
agat-gene-273	paeni_NIB01_000279	302358	303614	+		protein_coding					helix-turn-helix domain-containing protein		transcriptional regulators	-	-	-	-	-	-	-	-	-	-	-	-	HTH_19,HTH_3,TPR_12,TPR_8	operon0174								0.583272	0.656594	0.609421	0.0769144	0.036994	0.0168805	FALSE	1.12158	1.00643	0.898726	0.000110358	0.00182557	0.000157352	FALSE	14.4832
agat-gene-274	paeni_NIB01_000280	303749	303943	-		protein_coding					hypothetical protein																operon0175								-0.235473	-0.206916	-0.232839	0.397526	0.485549	0.28723	FALSE	0.206888	0.413154	0.314317	0.359353	0.134317	0.183344	FALSE	8.71235
agat-gene-275	paeni_NIB01_000281	304076	304495	-	fosB	protein_coding					metallothiol transferase FosB		Metallothiol transferase which confers resistance to fosfomycin by catalyzing the addition of a thiol cofactor to fosfomycin. L-cysteine is probably the physiological thiol donor	fosB	GO:0003674,GO:0003824,GO:0004364,GO:0008150,GO:0016740,GO:0016765,GO:0042221,GO:0046677,GO:0050896	2.5.1.18	ko:K11210,ko:K21252,ko:K21253,ko:K21264,ko:K21265	-	-	-	-	ko00000,ko01000,ko01504	-	-	-	Glyoxalase	operon0176								-0.0990962	-0.160787	-0.171927	0.583311	0.385792	0.309891	FALSE	-0.31844	-0.101842	-0.0995419	0.206742	0.743688	0.701012	FALSE	10.8138
agat-gene-276	paeni_NIB01_000282	304664	305563	+		protein_coding		oxidoreductase activity|0016491||IEA		GO:0016491	glucose 1-dehydrogenase		short-chain dehydrogenase	yhdF	-	1.1.1.100	ko:K00059	ko00061,ko00333,ko00780,ko01040,ko01100,ko01130,ko01212,map00061,map00333,map00780,map01040,map01100,map01130,map01212	M00083,M00572	R04533,R04534,R04536,R04543,R04566,R04953,R04964,R07759,R07763,R10116,R10120,R11671	RC00029,RC00117	ko00000,ko00001,ko00002,ko01000,ko01004	-	-	-	adh_short_C2	operon0177								0.486765	0.887476	NA	0.536786	0.11361	NA	#VALUE!	NA	NA	NA	NA	NA	NA	#VALUE!	2.07137
agat-gene-277	paeni_NIB01_000283	305768	307378	+		protein_coding					gamma-glutamyltransferase family protein		Gamma-glutamyltranspeptidase	ggt	GO:0003674,GO:0003824,GO:0005575,GO:0005623,GO:0006082,GO:0006508,GO:0006520,GO:0006807,GO:0008150,GO:0008152,GO:0008233,GO:0008238,GO:0008242,GO:0008652,GO:0009058,GO:0009987,GO:0016053,GO:0016787,GO:0019538,GO:0019752,GO:0030288,GO:0030313,GO:0031975,GO:0034722,GO:0036374,GO:0042597,GO:0043094,GO:0043102,GO:0043170,GO:0043436,GO:0044237,GO:0044238,GO:0044249,GO:0044281,GO:0044283,GO:0044464,GO:…	2.3.2.2,3.4.19.13	ko:K00681	ko00430,ko00460,ko00480,ko01100,map00430,map00460,map00480,map01100	-	R00494,R01262,R01687,R03867,R03916,R03970,R03971,R04935	RC00064,RC00090,RC00096	ko00000,ko00001,ko01000,ko01002	-	-	-	G_glu_transpept	operon0178								0.56154	0.740423	0.680727	0.162992	0.0433421	0.0274545	FALSE	-0.110354	-0.208657	-0.211432	0.484346	0.231924	0.212876	FALSE	36.7101
agat-gene-278	paeni_NIB01_000284	307800	308807	+		protein_coding					BMP family ABC transporter substrate-binding protein		ABC-type transport system, periplasmic component surface lipoprotein	bmpA	-	-	ko:K07335	-	-	-	-	ko00000	-	-	-	Bmp	operon0179	operon0053	c2	lanthipeptide-class-iv					-1.95493	-1.8081	-1.72367	0.000555945	0.000370369	3.47086e-08	TRUE	-0.393747	-0.455684	-0.393411	0.113291	0.104764	0.108912	FALSE	37.219
agat-gene-279	paeni_NIB01_000285	308835	310487	+		protein_coding	membrane|0016020||IEA			GO:0016020	methyl-accepting chemotaxis protein		chemotaxis protein	yvaQ	-	-	ko:K03406	ko02020,ko02030,map02020,map02030	-	-	-	ko00000,ko00001,ko02035	-	-	-	HAMP,MCPsignal,dCache_1	operon0179	operon0053	c2	lanthipeptide-class-iv					-2.96413	-2.88043	-2.86193	8.13673e-06	2.20344e-06	3.62359e-30	TRUE	-0.243221	-0.405572	-0.372308	0.205668	0.0993301	0.0824226	FALSE	82.4636
agat-gene-280	paeni_NIB01_000286	310995	312665	-		protein_coding		ADP-dependent NAD(P)H-hydrate dehydratase activity|0052855||IEA		GO:0052855	NAD(P)H-hydrate dehydratase		Bifunctional enzyme that catalyzes the epimerization of the S- and R-forms of NAD(P)HX and the dehydration of the S-form of NAD(P)HX at the expense of ADP, which is converted to AMP. This allows the repair of both epimers of NAD(P)HX, a damaged form of NAD(P)H that is a result of enzymatic or heat-dependent hydration	nnrD	GO:0003674,GO:0003824,GO:0016829,GO:0016835,GO:0016836,GO:0016853,GO:0016854,GO:0052855,GO:0052856,GO:0052857	4.2.1.136,5.1.99.6	ko:K17758,ko:K17759	-	-	-	-	ko00000,ko01000	-	-	-	Carb_kinase,YjeF_N	operon0180		c2	lanthipeptide-class-iv					-0.53561	-0.577799	-0.573328	0.0094023	0.0076928	0.00205501	FALSE	-1.12585	-1.31001	-1.27436	2.97086e-06	0.000249233	9.37133e-09	TRUE	168.35
agat-gene-281	paeni_NIB01_000287	312808	313440	-		protein_coding					NAD(P)H-binding protein		3-beta hydroxysteroid dehydrogenase	M1-643	-	-	ko:K07118	-	-	-	-	ko00000	-	-	-	NAD_binding_10	operon0181		c2	lanthipeptide-class-iv					-0.506898	-0.461694	-0.44014	0.0402878	0.0526032	0.0517214	FALSE	-0.272552	-0.256771	-0.25766	0.0546166	0.135548	0.11577	FALSE	143.327
agat-gene-282	paeni_NIB01_000288	313696	315441	-		protein_coding					alpha/beta fold hydrolase		peptidase	-	-	-	-	-	-	-	-	-	-	-	-	Peptidase_S9	operon0182	operon0054	c2	lanthipeptide-class-iv					-0.346311	-0.422209	-0.406875	0.339518	0.212361	0.11771	FALSE	NA	NA	NA	NA	NA	NA	#VALUE!	9.95463
agat-gene-283	paeni_NIB01_000289	315447	316907	-		protein_coding					hypothetical protein																operon0182	operon0054	c2	lanthipeptide-class-iv					-0.494144	-0.478674	-0.453959	0.244808	0.175707	0.100484	FALSE	NA	NA	NA	NA	NA	NA	#VALUE!	7.50018
agat-gene-284	paeni_NIB01_000290	316904	317704	-		protein_coding					hypothetical protein																operon0182	operon0054	c2	lanthipeptide-class-iv					0.0882304	-0.00919485	-0.0180682	0.747611	0.970667	0.951836	FALSE	NA	NA	NA	NA	NA	NA	#VALUE!	3.24524
agat-gene-285	paeni_NIB01_000291	317701	320424	-		protein_coding					protein kinase/lanthionine synthetase C family protein		Lanthionine synthetase C-like protein	-	-	-	-	-	-	-	-	-	-	-	-	LANC_like,Pkinase	operon0182	operon0054	c2	lanthipeptide-class-iv					0.986489	0.956288	0.929579	0.00659443	0.00437981	6.28838e-06	FALSE	NA	NA	NA	NA	NA	NA	#VALUE!	7.86958
agat-gene-286	paeni_NIB01_000292	320539	320676	-		protein_coding					hypothetical protein																operon0183		c2	lanthipeptide-class-iv					3.08732	3.61	3.38453	0.00158966	0.00154149	9.8648e-08	TRUE	NA	NA	NA	NA	NA	NA	#VALUE!	18.5356
agat-gene-287	paeni_NIB01_000293	320862	322142	-		protein_coding					MFS transporter		Major facilitator Superfamily	-	-	-	-	-	-	-	-	-	-	-	-	MFS_1	operon0184	operon0055	c2	lanthipeptide-class-iv					-0.0645982	-0.231022	-0.230979	0.85838	0.458759	0.397855	FALSE	NA	NA	NA	NA	NA	NA	#VALUE!	6.46586
agat-gene-288	paeni_NIB01_000294	322123	322500	-		protein_coding					ribbon-helix-helix domain-containing protein																operon0184	operon0055	c2	lanthipeptide-class-iv					-1.7208	-1.50705	NA	0.0100974	0.00806807	NA	#VALUE!	NA	NA	NA	NA	NA	NA	#VALUE!	5.54646
agat-gene-289	paeni_NIB01_000295	322717	323127	-		protein_coding					GNAT family N-acetyltransferase		GNAT family acetyltransferase	attT	-	-	-	-	-	-	-	-	-	-	-	Acetyltransf_10	operon0185		c2	lanthipeptide-class-iv					0.411148	0.636963	0.565834	0.40034	0.135902	0.0892545	FALSE	NA	NA	NA	NA	NA	NA	#VALUE!	2.04127
agat-gene-290	paeni_NIB01_000296	323356	324276	+		protein_coding					hypothetical protein		-	M1-641	-	-	-	-	-	-	-	-	-	-	-	-	operon0186		c2	lanthipeptide-class-iv					-1.01114	-1.00141	-0.998994	0.000235559	0.000319548	9.35069e-10	FALSE	0.103862	0.0761214	0.042112	0.491743	0.711218	0.845325	FALSE	85.8539
agat-gene-291	paeni_NIB01_000297	324426	324665	-		protein_coding					YezD family protein		Uncharacterized small protein (DUF2292)	yezD	-	-	-	-	-	-	-	-	-	-	-	DUF2292	operon0187		c2	lanthipeptide-class-iv					5.59663	5.58631	5.56445	6.67966e-09	2.61361e-08	4.59764e-180	TRUE	0.961582	1.03812	0.972105	2.66492e-06	0.000206273	1.29959e-08	FALSE	4.11538
agat-gene-293	paeni_NIB01_000299	325996	326832	-	cysT	protein_coding	integral component of plasma membrane|0005887||IEA, ATP-binding cassette (ABC) transporter complex, substrate-binding subunit-containing|0055052||IEA	ABC-type sulfate transporter activity|0015419||IEA	sulfate transport|0008272||IEA	GO:0008272, GO:0015419, GO:0005887, GO:0055052	sulfate ABC transporter permease subunit CysT		sulfate ABC transporter	cysT	GO:0005575,GO:0005623,GO:0005886,GO:0016020,GO:0044464,GO:0071944	-	ko:K02018,ko:K02046	ko00920,ko02010,map00920,map02010	M00185,M00189	-	-	ko00000,ko00001,ko00002,ko02000	3.A.1.6.1,3.A.1.6.3,3.A.1.8	-	iJN746.PP_5170	BPD_transp_1	operon0188	operon0056	c2	lanthipeptide-class-iv					5.9261	6.05383	6.01766	8.66868e-08	3.48807e-07	4.34631e-76	TRUE	0.556814	0.932592	0.770241	0.0189157	0.0198219	0.00647831	FALSE	1.20944
agat-gene-292	paeni_NIB01_000298	324892	325767	-	cysW	protein_coding	integral component of plasma membrane|0005887||IEA, ATP-binding cassette (ABC) transporter complex, substrate-binding subunit-containing|0055052||IEA	ABC-type sulfate transporter activity|0015419||IEA	sulfate transport|0008272||IEA	GO:0008272, GO:0015419, GO:0005887, GO:0055052	sulfate ABC transporter permease subunit CysW		Part of the ABC transporter complex CysAWTP involved in sulfate thiosulfate import	cysW	-	-	ko:K02047	ko00920,ko02010,map00920,map02010	M00185	-	-	ko00000,ko00001,ko00002,ko02000	3.A.1.6.1,3.A.1.6.3	-	-	BPD_transp_1	operon0188		c2	lanthipeptide-class-iv					5.84874	5.9288	5.8929	1.73752e-07	3.23217e-07	2.06772e-77	TRUE	0.427562	0.83026	0.67766	0.0521491	0.0273163	0.0123718	FALSE	1.12188
agat-gene-294	paeni_NIB01_000300	326915	327994	-		protein_coding					sulfate ABC transporter substrate-binding protein		Sulfate transporter subunit	sbp	-	-	ko:K02048	ko00920,ko02010,map00920,map02010	M00185	-	-	ko00000,ko00001,ko00002,ko02000	3.A.1.6.1,3.A.1.6.3	-	-	SBP_bac_11	operon0188	operon0056	c2	lanthipeptide-class-iv					6.92799	6.99024	6.96096	2.28144e-08	8.94208e-08	4.42556e-125	TRUE	0.787258	1.12947	0.987031	0.00105946	0.00506035	0.000375263	FALSE	0.815415
agat-gene-295	paeni_NIB01_000301	328478	330223	-		protein_coding					rhamnogalacturonan lyase		FG-GAP repeat protein	-	-	4.2.2.23	ko:K18197	-	-	-	-	ko00000,ko01000	-	PL11	-	CBM_6,Cadherin-like,Dockerin_1,PATR	operon0189		c2	lanthipeptide-class-iv					2.52626	2.61134	2.57249	4.36104e-06	3.34194e-06	4.41333e-30	TRUE	-0.958543	-1.00683	-0.929954	0.000107356	0.00408837	0.00025329	FALSE	7.40167
agat-gene-296	paeni_NIB01_000302	330601	331656	-		protein_coding					lactonase family protein		3-carboxymuconate cyclase	ykgB1	-	3.1.1.31	ko:K07404	ko00030,ko01100,ko01110,ko01120,ko01130,ko01200,map00030,map01100,map01110,map01120,map01130,map01200	M00004,M00006,M00008	R02035	RC00537	ko00000,ko00001,ko00002,ko01000	-	-	-	Lactonase	operon0190								2.25401	2.23691	2.21742	8.47669e-08	2.38903e-07	6.80977e-55	TRUE	-0.404287	-0.370371	-0.368036	0.00292884	0.032639	0.0157349	FALSE	80.2472
agat-gene-297	paeni_NIB01_000303	331982	332665	+		protein_coding					S-layer homology domain-containing protein		S-layer homology domain	-	-	-	-	-	-	-	-	-	-	-	-	HYR,REJ,SLH	operon0191		c3	terpene,lanthipeptide-class-ii					9.60681	9.5562	9.54159	1.8326e-09	4.88789e-09	0	TRUE	0.534089	0.388129	0.267159	0.0917462	0.326442	0.339957	FALSE	1.3572
agat-gene-298	paeni_NIB01_000304	332781	333407	-		protein_coding					nitroreductase family protein		nitroreductase	yodC	-	-	-	-	-	-	-	-	-	-	-	Nitroreductase	operon0192		c3	terpene,lanthipeptide-class-ii					-1.10439	-1.20593	-1.20285	0.000507607	8.07582e-05	1.41163e-10	TRUE	1.18456	1.25881	1.20035	2.98884e-06	3.97092e-05	1.75374e-13	TRUE	70.2406
agat-gene-299	paeni_NIB01_000305	333655	334125	-		protein_coding					Rrf2 family transcriptional regulator		Transcriptional regulator	ywnA	-	-	ko:K19587	-	M00767	-	-	ko00000,ko00002,ko03000	-	-	-	Rrf2	operon0193		c3	terpene,lanthipeptide-class-ii					0.264811	0.15904	0.141832	0.162426	0.461886	0.530579	FALSE	1.47852	1.47402	1.42317	6.2046e-08	7.33454e-06	9.2019e-20	TRUE	89.8735
agat-gene-300	paeni_NIB01_000306	334563	335288	+		protein_coding					MBL fold metallo-hydrolase		Zn-dependent hydrolases, including glyoxylases	yobT	-	-	-	-	-	-	-	-	-	-	-	Lactamase_B	operon0194	operon0057	c3	terpene,lanthipeptide-class-ii					-2.03083	-2.08976	-2.0006	0.00195603	0.00066951	5.21192e-08	TRUE	-0.981816	-0.984943	-0.868798	0.00330763	0.00510363	0.00383932	FALSE	19.9476
agat-gene-301	paeni_NIB01_000307	335285	335857	+		protein_coding					TetR/AcrR family transcriptional regulator		Transcriptional regulator	yobS	GO:0000976,GO:0001067,GO:0003674,GO:0003676,GO:0003677,GO:0003690,GO:0003700,GO:0005488,GO:0005575,GO:0005622,GO:0005623,GO:0005737,GO:0005829,GO:0006355,GO:0008150,GO:0009889,GO:0010468,GO:0010556,GO:0019219,GO:0019222,GO:0031323,GO:0031326,GO:0043565,GO:0044212,GO:0044424,GO:0044444,GO:0044464,GO:0050789,GO:0050794,GO:0051171,GO:0051252,GO:0060255,GO:0065007,GO:0080090,GO:0097159,GO:0140110,GO:…	-	-	-	-	-	-	-	-	-	-	TetR_N,WHG	operon0194	operon0057	c3	terpene,lanthipeptide-class-ii					-2.43455	-2.14202	NA	0.00121903	0.000277333	NA	#VALUE!	-0.53687	-0.761351	-0.65704	0.0910423	0.0274142	0.0179973	FALSE	16.4369
agat-gene-302	paeni_NIB01_000308	335947	337077	-		protein_coding					hypothetical protein		-	-	-	-	-	-	-	-	-	-	-	-	-	-	operon0195		c3	terpene,lanthipeptide-class-ii					0.28659	0.43261	0.397284	0.403894	0.242705	0.25191	FALSE	0.0602541	-0.00119598	-0.0231319	0.736723	0.995266	0.921846	FALSE	93.9862
agat-gene-303	paeni_NIB01_000309	337539	338024	+		protein_coding					cytochrome c biogenesis protein CcdC		Membrane protein involved in cytochrome C biogenesis	yneJ	-	-	-	-	-	-	-	-	-	-	-	DUF1453	operon0196		c3	terpene,lanthipeptide-class-ii					-0.32434	-0.21843	-0.221718	0.0598279	0.183807	0.17057	FALSE	0.276453	0.305898	0.25873	0.043192	0.079481	0.104809	FALSE	73.6665
agat-gene-306	paeni_NIB01_000312	341295	341477	-	comX	protein_coding					competence pheromone ComX		-	-	-	-	ko:K02253	ko02020,ko02024,map02020,map02024	-	-	-	ko00000,ko00001,ko02044	-	-	-	-	operon0197	operon0058	c3	terpene,lanthipeptide-class-ii					-2.8452	-2.78013	-2.54431	0.0389366	0.00394763	8.46252e-06	TRUE	NA	NA	NA	NA	NA	NA	#VALUE!	171.864
agat-gene-305	paeni_NIB01_000311	338962	341262	-		protein_coding	integral component of membrane|0016021||IEA			GO:0016021	histidine kinase		signal transduction histidine kinase	hpk4	-	2.7.13.3	ko:K07680,ko:K07683	ko02020,ko02024,map02020,map02024	M00476,M00483	-	-	ko00000,ko00001,ko00002,ko01000,ko01001,ko02022	-	-	-	HATPase_c,HisKA_3,PAS_9,PilJ	operon0197	operon0058	c3	terpene,lanthipeptide-class-ii					-3.79545	-3.68394	-3.51704	0.00208189	0.000693474	1.83658e-09	TRUE	-0.759346	-0.583198	-0.555597	0.00060847	0.0158665	0.00488162	FALSE	1048.64
agat-gene-304	paeni_NIB01_000310	338263	338919	-		protein_coding					response regulator transcription factor		response regulator	-	-	-	ko:K07691	ko02020,ko02024,map02020,map02024	M00476	-	-	ko00000,ko00001,ko00002,ko02022	-	-	-	GerE,Response_reg	operon0197	operon0058	c3	terpene,lanthipeptide-class-ii					-3.02473	-2.98142	-2.75217	0.00624292	0.00188818	6.62367e-07	TRUE	-0.616225	-0.606226	-0.596987	0.000304971	0.00345173	0.000208595	FALSE	566.64
agat-gene-307	paeni_NIB01_000313	341725	342642	-		protein_coding			isoprenoid biosynthetic process|0008299||IEA	GO:0008299	polyprenyl synthetase family protein		Belongs to the FPP GGPP synthase family	comQ	-	-	ko:K02251	ko02024,map02024	-	-	-	ko00000,ko00001,ko02044	-	-	-	polyprenyl_synt	operon0198		c3	terpene,lanthipeptide-class-ii					-1.39566	-1.23857	-1.1841	0.0208013	0.00472893	0.000231147	TRUE	0.58991	0.690479	0.462191	0.144821	0.11994	0.123264	FALSE	24.7498
agat-gene-309	paeni_NIB01_000315	343906	344088	-		protein_coding					hypothetical protein																operon0199	operon0059	c3	terpene,lanthipeptide-class-ii					-2.70716	-2.64488	-2.32928	0.234496	0.0279069	0.000803334	FALSE	NA	NA	NA	NA	NA	NA	#VALUE!	15.2986
agat-gene-312	paeni_NIB01_000318	347783	348043	-		protein_coding			regulation of transcription, DNA-templated|0006355||IEA	GO:0006355	LuxR C-terminal-related transcriptional regulator		helix_turn_helix, Lux Regulon	yfiK	-	-	ko:K11618	ko02020,map02020	M00481,M00754	-	-	ko00000,ko00001,ko00002,ko02022	-	-	-	GerE	operon0199	operon0059	c3	terpene,lanthipeptide-class-ii					-4.15403	-4.09516	-3.4967	0.15716	0.00723383	0.000132154	FALSE	NA	NA	NA	NA	NA	NA	#VALUE!	67.0145
agat-gene-311	paeni_NIB01_000317	345640	347790	-		protein_coding					peptidase domain-containing ABC transporter		Peptidase C39 family	lanT	-	3.6.3.27	ko:K06021,ko:K06147,ko:K06148,ko:K13409,ko:K20344,ko:K20386	ko02010,ko02024,ko04626,map02010,map02024,map04626	M00339	-	-	ko00000,ko00001,ko00002,ko01000,ko02000,ko02044	3.A.1,3.A.1.106,3.A.1.109,3.A.1.110,3.A.1.111.1,3.A.1.112,3.A.1.21	-	-	ABC_membrane,ABC_tran,Peptidase_C39	operon0199	operon0059	c3	terpene,lanthipeptide-class-ii					-3.69114	-3.61776	-3.29901	0.0355028	0.00517413	6.29595e-06	TRUE	-0.693562	-0.556259	-0.507231	0.00138428	0.0504514	0.0268829	FALSE	457.683
agat-gene-310	paeni_NIB01_000316	344085	345656	-		protein_coding			proteolysis|0006508||IEA	GO:0006508	S8 family serine peptidase		Belongs to the peptidase S8 family	-	-	-	-	-	-	-	-	-	-	-	-	PA,Peptidase_S8	operon0199	operon0059	c3	terpene,lanthipeptide-class-ii					-2.83112	-2.78543	-2.36265	0.025363	0.00763984	8.11369e-05	TRUE	-0.586204	-0.366702	-0.339523	0.00165876	0.147192	0.114279	FALSE	417.186
agat-gene-308	paeni_NIB01_000314	342800	343894	-		protein_coding			proteolysis|0006508||IEA	GO:0006508	site-2 protease family protein																operon0199	operon0059	c3	terpene,lanthipeptide-class-ii					-2.33524	-2.24773	-1.93418	0.0486313	0.0191618	0.00142517	TRUE	-0.652283	-0.525461	-0.487829	0.00216082	0.0453951	0.022945	FALSE	267.768
agat-gene-313	paeni_NIB01_000319	348288	348476	+		protein_coding			defense response to Gram-positive bacterium|0050830||IEA	GO:0050830	mersacidin family lantibiotic		Two-component Enterococcus faecalis cytolysin (EFC)	-	-	-	ko:K20384	ko02024,map02024	-	-	-	ko00000,ko00001	-	-	-	Mersacidin	operon0200	operon0060	c3	terpene,lanthipeptide-class-ii					1.46533	1.44761	1.32533	0.00807006	0.00743954	0.000748449	TRUE	0.162684	0.292176	0.21274	0.351595	0.279194	0.356909	FALSE	107.758
agat-gene-314	paeni_NIB01_000320	348539	348775	+		protein_coding			defense response to Gram-positive bacterium|0050830||IEA	GO:0050830	mersacidin family lantibiotic		Two-component Enterococcus faecalis cytolysin (EFC)	-	-	-	ko:K20383	ko02024,map02024	-	-	-	ko00000,ko00001	-	-	-	Mersacidin	operon0201	operon0060	c3	terpene,lanthipeptide-class-ii					1.7711	1.74891	1.65087	0.0015675	0.00171114	1.20708e-05	TRUE	0.00149014	0.197277	0.142774	0.992735	0.392171	0.502693	FALSE	144.137
agat-gene-315	paeni_NIB01_000321	348970	352239	+		protein_coding					type 2 lanthipeptide synthetase LanM family protein		Domain of unknown function (DUF4135)	-	-	-	-	-	-	-	-	-	-	-	-	DUF4135,LANC_like	operon0202		c3	terpene,lanthipeptide-class-ii					-2.35038	-2.33316	-1.97597	0.0248417	0.0232191	0.00200095	TRUE	-0.42506	-0.335547	-0.323264	0.00448869	0.122154	0.0939531	FALSE	887.15
agat-gene-316	paeni_NIB01_000322	352388	353401	-		protein_coding					NADP-dependent oxidoreductase		N-terminal domain of oxidoreductase	yfmJ	-	1.6.5.5	ko:K00344,ko:K07119	-	-	-	-	ko00000,ko01000	-	-	-	ADH_N_2,ADH_zinc_N	operon0203		c3	terpene,lanthipeptide-class-ii					-0.108701	-0.0974943	-0.106428	0.578917	0.574779	0.55005	FALSE	-0.490489	-0.276172	-0.26588	0.00876762	0.20445	0.17225	FALSE	61.3449
agat-gene-317	paeni_NIB01_000323	353576	354322	-	map	protein_coding			cellular protein modification process|0006464||IEA	GO:0006464	type I methionyl aminopeptidase		generally Co(II) however activity has been shown for some methionine aminopeptidases with Zn, Fe, or Mn	map	GO:0000096,GO:0003674,GO:0003824,GO:0004177,GO:0005488,GO:0005506,GO:0005575,GO:0005622,GO:0005623,GO:0005737,GO:0005829,GO:0006082,GO:0006464,GO:0006508,GO:0006520,GO:0006555,GO:0006790,GO:0006807,GO:0008150,GO:0008152,GO:0008198,GO:0008233,GO:0008235,GO:0008237,GO:0008238,GO:0009066,GO:0009987,GO:0010467,GO:0016151,GO:0016485,GO:0016787,GO:0019538,GO:0019752,GO:0030145,GO:0035551,GO:0036211,GO:…	3.4.11.18	ko:K01265	-	-	-	-	ko00000,ko01000,ko01002	-	-	-	Peptidase_M24,SEC-C	operon0204		c3	terpene,lanthipeptide-class-ii					0.253949	0.212582	0.195389	0.0454928	0.141337	0.104577	FALSE	0.0149165	0.0930284	0.0619804	0.898247	0.551261	0.691731	FALSE	122.118
agat-gene-318	paeni_NIB01_000324	354823	355665	-		protein_coding			protein phosphorylation|0006468||IEA	GO:0006468	protein kinase		RIO1 family	-	-	2.7.11.1	ko:K08884	-	-	-	-	ko00000,ko01000,ko01001	-	-	-	Pkinase	operon0205	operon0061	c3	terpene,lanthipeptide-class-ii					-0.734982	-0.784616	-0.798463	0.00194814	0.00149405	2.0193e-07	FALSE	0.0221621	0.00842326	-0.00894774	0.935898	0.977972	0.974881	FALSE	27.8363
agat-gene-319	paeni_NIB01_000325	355779	356438	-		protein_coding					hypothetical protein		Transcriptional regulator	M1-624	-	-	ko:K03496,ko:K22491	-	-	-	-	ko00000,ko03000,ko03036,ko04812	-	-	-	DUF3967,HTH_17,MerR_1	operon0206	operon0061	c3	terpene,lanthipeptide-class-ii					0.599469	0.655918	0.599809	0.167638	0.0552302	0.0395204	FALSE	0.333863	0.116875	0.063213	0.251955	0.740769	0.829871	FALSE	4.9308
agat-gene-320	paeni_NIB01_000326	356939	357892	+		protein_coding	cytoplasm|0005737||IEA	L-lactate dehydrogenase activity|0004459||IEA	glycolytic process|0006096||IEA	GO:0006096, GO:0004459, GO:0005737	L-lactate dehydrogenase		Belongs to the LDH MDH superfamily. LDH family	ldh	GO:0003674,GO:0003824,GO:0004457,GO:0004459,GO:0005975,GO:0006082,GO:0006090,GO:0006091,GO:0006096,GO:0006139,GO:0006163,GO:0006164,GO:0006165,GO:0006725,GO:0006732,GO:0006733,GO:0006753,GO:0006754,GO:0006757,GO:0006793,GO:0006796,GO:0006807,GO:0008150,GO:0008152,GO:0009056,GO:0009058,GO:0009108,GO:0009117,GO:0009123,GO:0009124,GO:0009126,GO:0009127,GO:0009132,GO:0009135,GO:0009141,GO:0009142,GO:…	1.1.1.27	ko:K00016	ko00010,ko00270,ko00620,ko00640,ko01100,ko01110,ko01120,ko01130,ko04922,map00010,map00270,map00620,map00640,map01100,map01110,map01120,map01130,map04922	-	R00703,R01000,R03104	RC00031,RC00044	ko00000,ko00001,ko01000,ko04147	-	-	-	Ldh_1_C,Ldh_1_N	operon0207		c3	terpene,lanthipeptide-class-ii					-0.133991	-0.0662598	-0.0688526	0.771755	0.806802	0.790984	FALSE	-0.327806	-0.473512	-0.436036	0.101311	0.039322	0.0401056	FALSE	34.5676
agat-gene-321	paeni_NIB01_000327	358016	360730	-		protein_coding					PAS domain S-box protein		Histidine kinase	-	-	-	-	-	-	-	-	-	-	-	-	GAF,HATPase_c,HisKA,Hpt,PAS,PAS_3,PAS_4,PAS_8,PAS_9,Response_reg	operon0208		c3	terpene,lanthipeptide-class-ii					0.785192	0.830352	0.813865	0.000403956	0.000471153	2.75205e-06	FALSE	-0.68444	-0.688693	-0.674046	3.03333e-05	0.0018038	3.68227e-05	FALSE	305.086
agat-gene-324	paeni_NIB01_000330	362455	363369	-		protein_coding					ABC transporter ATP-binding protein		Bacitracin ABC transporter ATP-binding protein	bcrA	-	-	ko:K20459	ko02010,map02010	M00813	-	-	ko00000,ko00001,ko00002,ko02000	3.A.1.124.3,3.A.1.124.4,3.A.1.124.5	-	-	ABC_tran	operon0209	operon0062	c3?	terpene,lanthipeptide-class-ii					-1.00521	-1.08628	-1.0636	0.00231159	0.00136718	7.41201e-07	TRUE	-2.61252	-2.72073	-2.67512	2.87065e-08	4.99601e-05	3.08684e-17	TRUE	35.2434
agat-gene-323	paeni_NIB01_000329	361742	362458	-		protein_coding					ABC transporter permease		Permease	bcrB1	-	-	ko:K20460,ko:K20461	ko02010,map02010	M00813	-	-	ko00000,ko00001,ko00002,ko02000	3.A.1.124.3,3.A.1.124.4,3.A.1.124.5	-	-	ABC2_membrane_4	operon0209	operon0062	c3?	terpene,lanthipeptide-class-ii					-1.34464	-1.40097	-1.39193	0.000479165	0.000596777	1.40256e-09	TRUE	-2.70188	-2.71326	-2.67253	4.79426e-08	4.29206e-05	4.7268e-18	TRUE	26.9388
agat-gene-322	paeni_NIB01_000328	361006	361740	-		protein_coding					ABC transporter permease		Protein conserved in bacteria	mrsE1	-	-	ko:K20461	ko02010,map02010	M00813	-	-	ko00000,ko00001,ko00002,ko02000	3.A.1.124.3,3.A.1.124.4,3.A.1.124.5	-	-	ABC2_membrane_4	operon0209	operon0062	c3	terpene,lanthipeptide-class-ii					-1.30109	-1.35466	-1.34077	0.00012856	5.46254e-05	9.79245e-15	TRUE	-2.87155	-2.91127	-2.8659	4.01018e-08	4.57141e-05	2.76684e-18	TRUE	27.2015
agat-gene-325	paeni_NIB01_000331	363453	364997	-		protein_coding					HAMP domain-containing histidine kinase		Histidine kinase	ybdK	-	-	-	-	-	-	-	-	-	-	-	HAMP,HATPase_c,HisKA	operon0210	operon0062							-1.99043	-1.86175	-1.84024	8.6915e-06	2.06103e-05	2.76917e-18	TRUE	0.145833	0.333994	0.253646	0.504033	0.187292	0.262378	FALSE	64.2755
agat-gene-326	paeni_NIB01_000332	364994	365677	-		protein_coding					response regulator transcription factor		Response regulators consisting of a CheY-like receiver domain and a winged-helix DNA-binding domain	rcaC	-	-	-	-	-	-	-	-	-	-	-	Response_reg,Trans_reg_C	operon0210	operon0062							-1.16097	-1.09961	-1.06683	0.00326828	0.00445784	1.49504e-05	TRUE	1.07082	0.681573	0.460723	0.0103829	0.10509	0.127566	FALSE	20.7192
agat-gene-327	paeni_NIB01_000333	365957	367711	+		protein_coding					alpha-glycosidase		Belongs to the glycosyl hydrolase 13 family	nplT	-	3.2.1.133,3.2.1.135,3.2.1.54	ko:K01208	ko00500,ko01100,map00500,map01100	-	R02112,R03122,R11262	-	ko00000,ko00001,ko01000	-	GH13	-	AMPK1_CBM,Alpha-amylase,Alpha-amylase_N,Malt_amylase_C	operon0211								4.86356	4.9207	4.90178	7.9178e-09	2.81115e-08	1.92593e-147	TRUE	-0.656133	-0.703355	-0.686613	2.99499e-05	0.00182519	4.21499e-05	FALSE	13.2956
agat-gene-329	paeni_NIB01_000335	368834	369523	-	sdaAB	protein_coding		L-serine ammonia-lyase activity|0003941||IEA	gluconeogenesis|0006094||IEA, L-serine catabolic process|0006565||IEA	GO:0006094, GO:0006565, GO:0003941	L-serine ammonia-lyase, iron-sulfur-dependent subunit beta		dehydratase	sdaAB	GO:0003674,GO:0003824,GO:0003941,GO:0016829,GO:0016840,GO:0016841	4.3.1.17	ko:K01752	ko00260,ko00270,ko01100,ko01110,ko01130,ko01200,ko01230,map00260,map00270,map01100,map01110,map01130,map01200,map01230	-	R00220,R00590	RC00331,RC02600	ko00000,ko00001,ko01000	-	-	-	ACT,SDH_alpha,SDH_beta	operon0212	operon0063							1.47095	1.46223	1.39189	0.000890631	0.002333	2.51357e-05	TRUE	-1.1818	-1.43046	-1.36483	0.000780564	0.00057512	1.0858e-06	TRUE	7.66162
agat-gene-328	paeni_NIB01_000334	367900	368844	-	sdaAA	protein_coding		L-serine ammonia-lyase activity|0003941||IEA	gluconeogenesis|0006094||IEA, L-serine catabolic process|0006565||IEA	GO:0006094, GO:0006565, GO:0003941	L-serine ammonia-lyase, iron-sulfur-dependent, subunit alpha		dehydratase	sdaAA	-	4.3.1.17	ko:K01752	ko00260,ko00270,ko01100,ko01110,ko01130,ko01200,ko01230,map00260,map00270,map01100,map01110,map01130,map01200,map01230	-	R00220,R00590	RC00331,RC02600	ko00000,ko00001,ko01000	-	-	-	SDH_alpha	operon0212	operon0063							1.71735	1.62062	1.57924	8.13834e-05	3.09852e-05	6.42827e-15	TRUE	-1.00803	-1.21976	-1.18333	0.000120741	0.000325125	1.40643e-07	TRUE	12.5322
agat-gene-330	paeni_NIB01_000336	370243	371520	-		protein_coding					MFS transporter		Transmembrane secretion effector	-	-	-	ko:K02445,ko:K03762	-	-	-	-	ko00000,ko02000	2.A.1.4.3,2.A.1.6.4	-	-	MFS_1	operon0213	operon0064							0.216186	0.189082	0.163319	0.495187	0.479717	0.532937	FALSE	NA	NA	NA	NA	NA	NA	#VALUE!	9.75762
agat-gene-331	paeni_NIB01_000337	371551	372648	-		protein_coding					phosphotransferase		Phosphotransferase enzyme family	-	-	-	-	-	-	-	-	-	-	-	-	APH,Choline_kinase	operon0213	operon0064							-0.45597	-0.503729	-0.488456	0.233302	0.145005	0.101383	FALSE	NA	NA	NA	NA	NA	NA	#VALUE!	13.9113
agat-gene-332	paeni_NIB01_000338	372876	373631	-	pstB	protein_coding	cytoplasmic side of plasma membrane|0009898||IEA, ATP-binding cassette (ABC) transporter complex, substrate-binding subunit-containing|0055052||IEA	ATP binding|0005524||IEA, ATPase-coupled phosphate ion transmembrane transporter activity|0015415||IEA		GO:0005524, GO:0015415, GO:0009898, GO:0055052	phosphate ABC transporter ATP-binding protein PstB		Part of the ABC transporter complex PstSACB involved in phosphate import. Responsible for energy coupling to the transport system	pstB	-	3.6.3.27	ko:K02036	ko02010,map02010	M00222	-	-	ko00000,ko00001,ko00002,ko01000,ko02000	3.A.1.7	-	iLJ478.TM1261	ABC_tran	operon0214	operon0065							5.68695	5.63196	5.61506	1.8326e-09	5.06519e-09	0	TRUE	-1.12936	-1.26024	-1.17663	4.11613e-05	0.00257585	3.11705e-05	TRUE	4.15369
agat-gene-333	paeni_NIB01_000339	373644	374531	-	pstA	protein_coding	integral component of plasma membrane|0005887||IEA, ATP-binding cassette (ABC) transporter complex, substrate-binding subunit-containing|0055052||IEA	ATPase-coupled phosphate ion transmembrane transporter activity|0015415||IEA		GO:0015415, GO:0005887, GO:0055052	phosphate ABC transporter permease PstA		Phosphate transport system permease	pstA	GO:0005575,GO:0005623,GO:0005886,GO:0016020,GO:0044464,GO:0071944	-	ko:K02038	ko02010,map02010	M00222	-	-	ko00000,ko00001,ko00002,ko02000	3.A.1.7	-	-	BPD_transp_1	operon0214	operon0065							5.77207	5.66374	5.64509	4.06786e-09	1.13601e-08	0	TRUE	-1.17803	-1.26208	-1.17915	2.52036e-05	0.00254639	2.94383e-05	TRUE	1.98381
agat-gene-334	paeni_NIB01_000340	374534	375442	-	pstC	protein_coding	integral component of plasma membrane|0005887||IEA, ATP-binding cassette (ABC) transporter complex, substrate-binding subunit-containing|0055052||IEA	ATPase-coupled phosphate ion transmembrane transporter activity|0015415||IEA		GO:0015415, GO:0005887, GO:0055052	phosphate ABC transporter permease subunit PstC		probably responsible for the translocation of the substrate across the membrane	pstC	GO:0005575,GO:0005623,GO:0005886,GO:0016020,GO:0044464,GO:0071944	-	ko:K02037	ko02010,map02010	M00222	-	-	ko00000,ko00001,ko00002,ko02000	3.A.1.7	-	-	BPD_transp_1	operon0214	operon0065							5.82144	5.69427	5.67261	5.82948e-09	1.24686e-08	1.1324e-278	TRUE	-0.941872	-1.00181	-0.917747	0.00020788	0.00689471	0.000558719	FALSE	2.76366
agat-gene-335	paeni_NIB01_000341	375582	376505	-		protein_coding					phosphate ABC transporter substrate-binding protein		Phosphate ABC transporter substrate-binding protein	pstS	GO:0003674,GO:0005488,GO:0006810,GO:0006811,GO:0006817,GO:0006820,GO:0008150,GO:0015698,GO:0042301,GO:0043167,GO:0043168,GO:0051179,GO:0051234	-	ko:K02040	ko02010,ko02020,ko05152,map02010,map02020,map05152	M00222	-	-	ko00000,ko00001,ko00002,ko02000	3.A.1.7	-	-	PBP_like_2	operon0214								9.24025	9.07934	9.06055	7.27923e-10	4.88789e-09	0	TRUE	0.138357	-0.0272187	-0.0414796	0.51738	0.945145	0.909069	FALSE	2.04127
agat-gene-336	paeni_NIB01_000342	377215	378507	-		protein_coding					arsenic transporter		Involved in arsenical resistance. Thought to form the channel of an arsenite pump	arsB	GO:0003674,GO:0005215,GO:0005575,GO:0005623,GO:0005886,GO:0005887,GO:0006810,GO:0006811,GO:0006820,GO:0008150,GO:0008490,GO:0008509,GO:0015075,GO:0015103,GO:0015104,GO:0015105,GO:0015291,GO:0015318,GO:0015698,GO:0015699,GO:0015700,GO:0016020,GO:0016021,GO:0022804,GO:0022857,GO:0031224,GO:0031226,GO:0034220,GO:0042960,GO:0044425,GO:0044459,GO:0044464,GO:0051179,GO:0051234,GO:0055085,GO:0071944,GO:…	-	ko:K03893	-	-	-	-	ko00000,ko02000	2.A.45.1,3.A.4.1	-	iAF1260.b3502,iB21_1397.B21_03304,iBWG_1329.BWG_3192,iECBD_1354.ECBD_0238,iECB_1328.ECB_03351,iECDH10B_1368.ECDH10B_3678,iECDH1ME8569_1439.ECDH1ME8569_3381,iECD_1391.ECD_03351,iECH74115_1262.ECH74115_4851,iECIAI1_1343.ECIAI1_3649,iECO103_1326.ECO103_4229,iECO111_1330.ECO111_4311,iECO26_1355.ECO26_4590,iECSE_1348.ECSE_3768,iECSP_1301.ECSP_4482,iECs_1301.ECs4374,iETEC_1333.ETEC_3749,iEcDH1_1363.EcD…	ArsB	operon0215	operon0066							-1.21049	-1.18352	-1.14763	0.000248734	0.000889769	1.75518e-06	TRUE	-0.890768	-0.796204	-0.769323	9.54934e-05	0.00204094	6.79165e-05	FALSE	69.874
agat-gene-337	paeni_NIB01_000343	378697	380793	-		protein_coding					methyl-accepting chemotaxis protein		chemotaxis protein	tlpB1	-	-	ko:K03406	ko02020,ko02030,map02020,map02030	-	-	-	ko00000,ko00001,ko02035	-	-	-	HAMP,MCPsignal,dCache_1	operon0216	operon0066							-0.736864	-0.721441	-0.715657	0.00168708	0.00531473	0.000327604	FALSE	-0.442573	-0.346694	-0.335233	0.0102957	0.0723889	0.0659373	FALSE	62.7377
agat-gene-338	paeni_NIB01_000344	380976	382019	-		protein_coding					EAL domain-containing protein		Signal peptide protein	M1-600	-	-	-	-	-	-	-	-	-	-	-	EAL,GGDEF,Peripla_BP_3	operon0217								-0.666091	-0.81558	-0.794781	0.00437732	0.00198285	7.47631e-05	FALSE	1.22016	1.18726	1.13611	2.65543e-07	2.98907e-05	1.40609e-14	TRUE	184.273
agat-gene-339	paeni_NIB01_000345	382233	384491	-		protein_coding		nucleotide binding|0000166||IEA, 2',3'-cyclic-nucleotide 2'-phosphodiesterase activity|0008663||IEA, hydrolase activity, acting on ester bonds|0016788||IEA	nucleotide catabolic process|0009166||IEA	GO:0009166, GO:0000166, GO:0008663, GO:0016788	bifunctional 2',3'-cyclic-nucleotide 2'-phosphodiesterase/3'-nucleotidase		Belongs to the 5'-nucleotidase family	cpdB	GO:0003674,GO:0003824,GO:0004112,GO:0005575,GO:0005623,GO:0006139,GO:0006725,GO:0006753,GO:0006793,GO:0006796,GO:0006807,GO:0006950,GO:0006974,GO:0008081,GO:0008150,GO:0008152,GO:0008252,GO:0008254,GO:0008663,GO:0009056,GO:0009058,GO:0009117,GO:0009166,GO:0009987,GO:0016311,GO:0016787,GO:0016788,GO:0016791,GO:0018130,GO:0019438,GO:0019439,GO:0019637,GO:0030288,GO:0030313,GO:0031975,GO:0033554,GO:…	3.1.3.6,3.1.4.16	ko:K01119	ko00230,ko00240,map00230,map00240	-	R01562,R01877,R02148,R02370,R03537,R03538,R03929,R05135	RC00078,RC00296	ko00000,ko00001,ko01000	-	-	iEC55989_1330.EC55989_4773,iECH74115_1262.ECH74115_5730,iECNA114_1301.ECNA114_4436,iECSP_1301.ECSP_5315,iECW_1372.ECW_m4577,iECs_1301.ECs5191,iEKO11_1354.EKO11_4095,iEcE24377_1341.EcE24377A_4783,iG2583_1286.G2583_5043,iWFL_1372.ECW_m4577,iZ_1308.Z5824	5_nucleotid_C,Gram_pos_anchor,Metallophos	operon0218								0.31663	-0.530733	-0.413483	0.471685	0.412951	NA	FALSE	-1.56041	-1.62037	-1.62272	6.202e-09	7.33454e-06	1.48207e-23	TRUE	631.049
agat-gene-340	paeni_NIB01_000346	384969	385385	-		protein_coding					pyridoxamine 5'-phosphate oxidase family protein		general stress protein	ydaG	-	1.4.3.5	ko:K00275	ko00750,ko01100,ko01120,map00750,map01100,map01120	M00124	R00277,R00278,R01710,R01711	RC00048,RC00116	ko00000,ko00001,ko00002,ko01000	-	-	-	Putative_PNPOx,Pyrid_ox_like	operon0219								3.56785	3.62391	3.60462	2.47473e-08	5.13175e-08	2.27875e-103	TRUE	-0.471266	-0.491975	-0.411781	0.0205865	0.135605	0.104898	FALSE	24.7443
agat-gene-341	paeni_NIB01_000347	385896	386354	-		protein_coding		hydrolase activity|0016787||IEA		GO:0016787	NUDIX domain-containing protein		Nudix hydrolase	-	-	3.6.1.55	ko:K03207,ko:K03574	-	-	-	-	ko00000,ko01000,ko03400	-	-	-	NUDIX	operon0220	operon0067							-1.43494	-1.4912	-1.47985	0.000244465	0.000202558	2.87474e-12	TRUE	0.846919	1.15768	0.998081	0.00421029	0.00585656	0.000851882	FALSE	37.8156
agat-gene-344	paeni_NIB01_000350	388207	388917	-	pxpB	protein_coding					5-oxoprolinase subunit PxpB		Allophanate hydrolase subunit 1	kipI	-	3.5.1.54	ko:K01457,ko:K06351,ko:K07160	ko00220,ko00791,ko01100,ko01120,map00220,map00791,map01100,map01120	-	R00005	RC02756	ko00000,ko00001,ko01000	-	-	-	CT_C_D	operon0221	operon0067							-1.17946	-1.18012	-1.20014	5.90184e-05	7.17037e-05	6.51295e-15	TRUE	0.728638	0.821942	0.689453	0.00151156	0.0140759	0.00622453	FALSE	53.2127
agat-gene-343	paeni_NIB01_000349	387182	388210	-		protein_coding					biotin-dependent carboxyltransferase family protein		Allophanate hydrolase subunit 2	kipA	-	6.3.4.6	ko:K01941,ko:K06350	ko00220,ko00791,ko01100,map00220,map00791,map01100	-	R00774	RC00378	ko00000,ko00001,ko01000	-	-	-	CT_A_B,CT_C_D	operon0221	operon0067							-1.7039	-1.67214	-1.65119	3.4275e-05	7.01531e-05	1.97079e-14	TRUE	1.00752	1.15511	1.01367	0.000412916	0.00308807	0.000242905	TRUE	83.0465
agat-gene-347	paeni_NIB01_000353	390378	390974	-		protein_coding					DUF1572 domain-containing protein		Protein of unknown function (DUF1572)	-	-	-	-	-	-	-	-	-	-	-	-	DUF1572	operon0221	operon0067							-0.421164	-0.458468	-0.4623	0.0143401	0.00864636	0.000230181	FALSE	0.584917	0.6025	0.490234	0.0112897	0.0268233	0.0373585	FALSE	37.7472
agat-gene-345	paeni_NIB01_000351	388957	389787	-		protein_coding					DUF2785 domain-containing protein		Protein of unknown function (DUF2785)	-	-	-	-	-	-	-	-	-	-	-	-	DUF2785	operon0221	operon0067							-1.20009	-1.07418	-1.07099	0.000161478	0.000459895	1.36784e-08	TRUE	0.700243	0.873365	0.708529	0.00448869	0.0230786	0.0113196	FALSE	50.5229
agat-gene-350	paeni_NIB01_000356	391959	392360	-		protein_coding					DUF2809 domain-containing protein		Protein of unknown function (DUF2809)	yjgA	-	-	-	-	-	-	-	-	-	-	-	DUF2809	operon0221	operon0067							-0.423246	-0.300434	-0.300807	0.158035	0.246292	0.232786	FALSE	NA	NA	NA	NA	NA	NA	#VALUE!	9.51956
agat-gene-348	paeni_NIB01_000354	391002	391331	-		protein_coding					DUF952 domain-containing protein		Protein of unknown function (DUF952)	-	-	2.3.2.29,2.5.1.18,3.8.1.2	ko:K00799,ko:K01560,ko:K21420	ko00361,ko00480,ko00625,ko00980,ko00982,ko00983,ko01100,ko01120,ko01524,ko05200,ko05204,ko05225,ko05418,map00361,map00480,map00625,map00980,map00982,map00983,map01100,map01120,map01524,map05200,map05204,map05225,map05418	-	R03522,R05287,R07002,R07003,R07004,R07023,R07024,R07025,R07026,R07069,R07070,R07083,R07084,R07091,R07092,R07093,R07094,R07100,R07113,R07116,R08280,R09409,R11547,R11548,R11905	RC00004,RC00064,RC00069,RC00697,RC00840,RC00948,RC01704,RC01705,RC01706,RC01758,RC01759,RC01765,RC01767,RC01769,RC02243,RC02527,RC02939,RC02940,RC02942,RC02943,RC02944	ko00000,ko00001,ko01000,ko02000	1.A.12.2.2,1.A.12.3.2	-	-	DUF952,GST_C_2,GST_N_3	operon0221	operon0067							-1.06675	-1.11133	-1.11605	0.00077975	0.000744274	2.2516e-10	TRUE	NA	NA	NA	NA	NA	NA	#VALUE!	24.9276
agat-gene-349	paeni_NIB01_000355	391383	391940	-		protein_coding					GNAT family N-acetyltransferase		Acetyltransferase (GNAT) domain	-	-	2.3.1.128	ko:K03790	-	-	-	-	ko00000,ko01000,ko03009	-	-	-	Acetyltransf_3	operon0221	operon0067							-0.944994	-0.755455	-0.727167	0.0101301	0.0209462	0.00504155	FALSE	NA	NA	0.833297	NA	NA	0.0117119	#VALUE!	15.9197
agat-gene-351	paeni_NIB01_000357	392364	392915	-		protein_coding					GrpB family protein		GrpB protein	-	-	-	-	-	-	-	-	-	-	-	-	Aminoglyc_resit,GrpB	operon0221	operon0067							-0.17974	-0.051997	-0.0579844	0.474802	0.83005	0.814112	FALSE	0.745201	0.670696	0.604877	0.00010866	0.00159584	0.000364191	FALSE	16.2563
agat-gene-346	paeni_NIB01_000352	389791	390381	-		protein_coding					histidine phosphatase family protein		Phosphoglycerate kinase	gpmB	-	3.1.3.73,5.4.2.12	ko:K02226,ko:K15634,ko:K15640	ko00010,ko00260,ko00680,ko00860,ko01100,ko01110,ko01120,ko01130,ko01200,ko01230,map00010,map00260,map00680,map00860,map01100,map01110,map01120,map01130,map01200,map01230	M00001,M00002,M00003,M00122	R01518,R04594,R11173	RC00017,RC00536	ko00000,ko00001,ko00002,ko01000	-	-	-	His_Phos_1	operon0221	operon0067							-0.718894	-0.667017	-0.688373	0.00168339	0.00355017	1.2056e-05	FALSE	NA	NA	NA	NA	NA	NA	#VALUE!	37.7554
agat-gene-342	paeni_NIB01_000348	386418	387185	-		protein_coding					LamB/YcsF family protein		Belongs to the UPF0271 (lamB) family	ycsF	-	-	ko:K07160	-	-	-	-	ko00000	-	-	-	LamB_YcsF	operon0221	operon0067							-1.93824	-1.94802	-1.9598	1.22768e-05	7.80017e-06	5.95497e-29	TRUE	NA	NA	NA	NA	NA	NA	#VALUE!	52.0224
agat-gene-352	paeni_NIB01_000358	393125	394222	-		protein_coding					Ig-like domain-containing protein		Bacterial Ig-like domain 2	tNN	-	-	-	-	-	-	-	-	-	-	-	Big_2,DUF3494	operon0222								0.054199	0.14657	0.128935	0.845061	0.590301	0.63768	FALSE	0.367991	0.331207	0.264714	0.0450368	0.145301	0.193394	FALSE	51.2453
agat-gene-354	paeni_NIB01_000360	395735	396760	-		protein_coding					polysaccharide biosynthesis protein		UDP-N-acetylglucosamine 4,6-dehydratase	-	-	4.2.1.115,5.1.3.2	ko:K15894,ko:K17716	ko00052,ko00520,ko01100,map00052,map00520,map01100	M00362	R00291,R09697	RC00289,RC02609	ko00000,ko00001,ko00002,ko01000	-	-	-	Hexapep,Polysacc_synt_2	operon0223	operon0068							1.88683	1.88172	1.80348	0.000422674	0.000504745	1.34153e-09	TRUE	NA	NA	NA	NA	NA	NA	#VALUE!	0.686809
agat-gene-353	paeni_NIB01_000359	394680	395786	-		protein_coding		undecaprenyldiphospho-muramoylpentapeptide beta-N-acetylglucosaminyltransferase activity|0050511||IEA		GO:0050511	undecaprenyldiphospho-muramoylpentapeptide beta-N-acetylglucosaminyltransferase		Cell wall formation. Catalyzes the transfer of a GlcNAc subunit on undecaprenyl-pyrophosphoryl-MurNAc-pentapeptide (lipid intermediate I) to form undecaprenyl-pyrophosphoryl-MurNAc- (pentapeptide)GlcNAc (lipid intermediate II)	murG	-	2.4.1.227	ko:K02563	ko00550,ko01100,ko01502,ko04112,map00550,map01100,map01502,map04112	-	R05032,R05662	RC00005,RC00049	ko00000,ko00001,ko01000,ko01011	-	GT28	-	Glyco_tran_28_C,Glyco_transf_28	operon0223	operon0068							0.726901	0.684963	0.65391	0.0517469	0.0634684	0.0136183	FALSE	NA	NA	NA	NA	NA	NA	#VALUE!	2.00023
agat-gene-355	paeni_NIB01_000361	396927	398312	-		protein_coding					HAMP domain-containing histidine kinase		Histidine kinase	-	-	-	-	-	-	-	-	-	-	-	-	HAMP,HATPase_c,HisKA	operon0224	operon0069							-0.883833	-0.96772	-0.933029	0.0194696	0.0165051	0.00115369	FALSE	NA	NA	NA	NA	NA	NA	#VALUE!	11.3447
agat-gene-356	paeni_NIB01_000362	398305	398952	-		protein_coding					response regulator transcription factor		regulator	-	-	-	-	-	-	-	-	-	-	-	-	Response_reg,Trans_reg_C	operon0224	operon0069							-1.05089	-1.04834	-1.03965	0.00399759	0.00192732	6.49458e-05	TRUE	NA	NA	NA	NA	NA	NA	#VALUE!	7.50018
agat-gene-357	paeni_NIB01_000363	399170	400468	-	serS	protein_coding	cytoplasm|0005737||IEA	serine-tRNA ligase activity|0004828||IEA	seryl-tRNA aminoacylation|0006434||IEA	GO:0006434, GO:0004828, GO:0005737	serine--tRNA ligase		seryl-tRNA synthetase	serS	GO:0000049,GO:0000166,GO:0003674,GO:0003676,GO:0003723,GO:0005488,GO:0005515,GO:0005524,GO:0008144,GO:0016597,GO:0017076,GO:0030554,GO:0031406,GO:0032553,GO:0032555,GO:0032559,GO:0035639,GO:0036094,GO:0042802,GO:0042803,GO:0043167,GO:0043168,GO:0043169,GO:0043177,GO:0046983,GO:0070905,GO:0097159,GO:0097367,GO:1901265,GO:1901363	6.1.1.11	ko:K01875	ko00970,map00970	M00359,M00360	R03662,R08218	RC00055,RC00523	ko00000,ko00001,ko00002,ko01000,ko01007,ko03016	-	-	-	Seryl_tRNA_N,tRNA-synt_2b	operon0225								0.656316	0.685444	0.659535	0.00200863	0.00551646	0.000925083	FALSE	1.03642	1.04957	0.97674	7.36771e-06	0.000286416	1.40643e-07	FALSE	81.7878
agat-gene-358	paeni_NIB01_000364	400848	402083	+		protein_coding			transmembrane transport|0055085||IEA	GO:0055085	MFS transporter		Fucose permease	glcP	-	-	ko:K08174	-	-	-	-	ko00000,ko02000	2.A.1.7	-	-	MFS_1	operon0226								-1.23215	-1.40121	-1.3701	0.00215252	0.000957969	1.94007e-06	TRUE	NA	NA	NA	NA	NA	NA	#VALUE!	6.69571
agat-gene-360	paeni_NIB01_000366	402978	403733	+		protein_coding					NAD(P)-dependent oxidoreductase		3-beta hydroxysteroid dehydrogenase/isomerase family	-	-	1.1.1.203	ko:K18981	ko00053,map00053	-	R10841	RC00066	ko00000,ko00001,ko01000	-	-	-	Epimerase	operon0227	operon0070							2.01655	2.05416	2.01963	4.02856e-06	3.43077e-06	9.32282e-26	TRUE	0.774274	0.748213	0.676403	6.8874e-05	0.00177026	0.000140371	FALSE	21.3185
agat-gene-359	paeni_NIB01_000365	402574	402960	+		protein_coding					VOC family protein		Glyoxalase-like domain	ywbC	-	4.4.1.5	ko:K01759,ko:K08234	ko00620,map00620	-	R02530	RC00004,RC00740	ko00000,ko00001,ko01000	-	-	-	Glyoxalase,Glyoxalase_4	operon0227	operon0070							1.36431	1.40108	1.36567	0.000153763	2.83435e-05	1.19865e-14	TRUE	1.00294	0.896059	0.822895	1.84948e-05	0.000571318	1.08012e-05	FALSE	10.3705
agat-gene-361	paeni_NIB01_000367	404213	405253	+		protein_coding					ABC transporter substrate-binding protein		ABC transporter substrate-binding protein	M1-596	-	-	-	-	-	-	-	-	-	-	-	NMT1	operon0228								0.00319125	0.113974	0.104048	0.986539	0.622759	0.660946	FALSE	1.17599	1.06099	0.985774	2.38104e-06	0.000265911	4.88684e-07	FALSE	66.1444
agat-gene-364	paeni_NIB01_000370	406569	407465	+		protein_coding					ABC transporter ATP-binding protein		ABC-type nitrate sulfonate bicarbonate transport system, ATPase component	M1-592	-	-	ko:K02049	-	M00188	-	-	ko00000,ko00002,ko02000	3.A.1.16,3.A.1.17	-	-	ABC_tran	operon0229	operon0071							-1.26706	-0.917091	-0.850005	0.00545007	0.0495587	0.0229216	FALSE	0.0207834	-0.202098	-0.193571	0.918488	0.369241	0.359089	FALSE	41.7859
agat-gene-363	paeni_NIB01_000369	405767	406525	+		protein_coding					ABC transporter permease		ABC-type nitrate sulfonate bicarbonate transport system, permease component	ssuC_2	-	-	-	-	-	-	-	-	-	-	-	BPD_transp_1	operon0229	operon0071							-1.01073	-0.848628	-0.818667	0.00195603	0.0105688	0.000944122	FALSE	-0.14686	-0.197405	-0.192052	0.442212	0.34127	0.354522	FALSE	29.3166
agat-gene-362	paeni_NIB01_000368	405477	405767	+		protein_coding					MTH1187 family thiamine-binding protein		Thiamine-binding protein	M1-594	-	-	-	-	-	-	-	-	-	-	-	Thiamine_BP	operon0229	operon0071							0.0566439	0.173455	0.162771	0.765416	0.451648	0.442109	FALSE	0.654208	0.510937	0.422841	0.00605636	0.0317831	0.0463597	FALSE	26.0796
agat-gene-365	paeni_NIB01_000371	407561	408367	+		protein_coding					TatD family hydrolase		TatD related DNase	M1-591	GO:0003674,GO:0003824,GO:0004518,GO:0004536,GO:0006139,GO:0006259,GO:0006308,GO:0006725,GO:0006807,GO:0008150,GO:0008152,GO:0009056,GO:0009057,GO:0009987,GO:0016787,GO:0016788,GO:0019439,GO:0034641,GO:0034655,GO:0043170,GO:0044237,GO:0044238,GO:0044248,GO:0044260,GO:0044265,GO:0044270,GO:0046483,GO:0046700,GO:0071704,GO:0090304,GO:0090305,GO:0140097,GO:1901360,GO:1901361,GO:1901575	-	ko:K03424	-	-	-	-	ko00000,ko01000	-	-	-	TatD_DNase	operon0230								2.08711	2.11209	2.09808	5.75257e-07	1.37143e-06	3.00359e-50	TRUE	-0.0957514	-0.190496	-0.17298	0.676075	0.46576	0.459382	FALSE	10.3979
agat-gene-366	paeni_NIB01_000372	408475	409218	-	nfsA	protein_coding		oxidoreductase activity|0016491||IEA		GO:0016491	oxygen-insensitive NADPH nitroreductase		NAD(P)H-dependent oxidoreductase	nfrA	-	1.5.1.38,1.5.1.39	ko:K10678,ko:K19285,ko:K19286	ko00633,ko00740,ko01100,ko01120,map00633,map00740,map01100,map01120	-	R05705,R05706,R08014,R08017,R08042	RC00126,RC00250	ko00000,ko00001,ko01000	-	-	-	Nitroreductase	operon0231	operon0072							-0.725471	-0.671238	-0.675599	0.000465832	0.00105998	4.68561e-07	FALSE	-0.0315504	-0.0491049	-0.0692408	0.79526	0.739912	0.624769	FALSE	99.8747
agat-gene-367	paeni_NIB01_000373	409202	409810	-		protein_coding		DNA binding|0003677||IEA		GO:0003677	TetR family transcriptional regulator		Bacterial regulatory proteins, tetR family	yttP	GO:0000976,GO:0001067,GO:0003674,GO:0003676,GO:0003677,GO:0003690,GO:0003700,GO:0005488,GO:0005575,GO:0005622,GO:0005623,GO:0005737,GO:0005829,GO:0006355,GO:0008150,GO:0009889,GO:0010468,GO:0010556,GO:0019219,GO:0019222,GO:0031323,GO:0031326,GO:0043565,GO:0044212,GO:0044424,GO:0044444,GO:0044464,GO:0050789,GO:0050794,GO:0051171,GO:0051252,GO:0060255,GO:0065007,GO:0080090,GO:0097159,GO:0140110,GO:…	-	ko:K09017	-	-	-	-	ko00000,ko03000	-	-	-	TetR_N	operon0231	operon0072							-0.874844	-0.876631	-0.882281	0.000157418	7.74477e-05	9.12482e-13	FALSE	0.550038	0.654534	0.59216	0.000605733	0.00216551	0.000211697	FALSE	93.0832
agat-gene-368	paeni_NIB01_000374	410040	411200	-		protein_coding					ABC transporter permease		ABC-2 family transporter protein	-	-	-	-	-	-	-	-	-	-	-	-	ABC2_membrane_3,DUF3533	operon0232								-4.75468	-4.73529	-4.72748	1.05026e-06	1.00204e-07	1.26984e-82	TRUE	-0.272863	-0.46695	-0.451605	0.0691025	0.0193331	0.00952269	FALSE	208.79
agat-gene-370	paeni_NIB01_000376	414228	414428	-		protein_coding		copper ion binding|0005507||IEA		GO:0005507	copper ion binding protein		Copper resistance protein CopZ	copZ	GO:0005575,GO:0005622,GO:0005623,GO:0005737,GO:0044424,GO:0044464	-	ko:K07213	ko04978,map04978	-	-	-	ko00000,ko00001	-	-	-	HMA	operon0233	operon0073							1.69933	1.63663	1.60782	4.41776e-06	8.27143e-06	2.36341e-24	TRUE	0.349437	0.44348	0.353982	0.110365	0.0708252	0.108773	FALSE	33.837
agat-gene-369	paeni_NIB01_000375	411538	413970	-		protein_coding		ATPase-coupled ion transmembrane transporter activity|0042625||IEA		GO:0042625	heavy metal translocating P-type ATPase		ATPase P	copA	GO:0003674,GO:0005488,GO:0005515,GO:0005575,GO:0005623,GO:0005886,GO:0016020,GO:0042802,GO:0044464,GO:0071944	3.6.3.54	ko:K17686	ko01524,ko04016,map01524,map04016	-	R00086	RC00002	ko00000,ko00001,ko01000	3.A.3.5	-	-	E1-E2_ATPase,HMA,Hydrolase	operon0233								2.29804	2.2733	2.22532	5.32792e-06	1.68739e-05	5.80682e-18	TRUE	-0.131082	-0.139038	-0.150045	0.384429	0.437977	0.406219	FALSE	43.6466
agat-gene-371	paeni_NIB01_000377	414477	414878	-		protein_coding					metal-sensitive transcriptional regulator		Metal-sensitive transcriptional repressor	csoR	-	-	ko:K21600	-	-	-	-	ko00000,ko03000	-	-	-	Trns_repr_metal	operon0233	operon0073							1.68223	1.62075	1.59529	1.88398e-06	3.24178e-06	6.0491e-31	TRUE	0.78376	0.857819	0.800959	3.5337e-05	0.000247988	5.97134e-08	FALSE	52.6463
agat-gene-372	paeni_NIB01_000378	415032	415514	-		protein_coding					GNAT family N-acetyltransferase		Acetyltransferase (GNAT) domain	-	-	-	-	-	-	-	-	-	-	-	-	Acetyltransf_1	operon0234								-2.50805	-2.43469	-2.37329	0.00175821	0.000304647	2.48627e-09	TRUE	NA	NA	NA	NA	NA	NA	#VALUE!	19.0145
agat-gene-374	paeni_NIB01_000380	415894	416187	-		protein_coding					hypothetical protein		-	-	-	-	-	-	-	-	-	-	-	-	-	-	operon0235	operon0074							-0.266767	-0.91651	NA	0.763221	0.482518	NA	#VALUE!	NA	NA	NA	NA	NA	NA	#VALUE!	0.744272
agat-gene-373	paeni_NIB01_000379	415664	415846	-		protein_coding					hypothetical protein		-	-	-	-	-	-	-	-	-	-	-	-	-	-	operon0235	operon0074							8.28803	7.95755	7.90662	1.72332e-08	4.21787e-07	1.82694e-85	TRUE	-1.64067	-1.59772	-1.05941	0.000175055	0.0133521	0.0239434	TRUE	0.673128
agat-gene-379	paeni_NIB01_000385	419936	421435	-		protein_coding					ABC transporter ATP-binding protein		ABC transporter	-	-	3.6.3.17	ko:K02056	-	M00221	-	-	ko00000,ko00002,ko01000,ko02000	3.A.1.2	-	-	ABC_tran	operon0236	operon0075							-2.55747	-3.79582	-3.5855	0.0235894	0.00134906	2.61988e-08	TRUE	0.507475	0.493114	0.434222	0.000962002	0.00895059	0.00565201	FALSE	179.856
agat-gene-378	paeni_NIB01_000384	418872	419939	-		protein_coding					ABC transporter permease		Belongs to the binding-protein-dependent transport system permease family	-	-	-	ko:K02057	-	M00221	-	-	ko00000,ko00002,ko02000	3.A.1.2	-	-	BPD_transp_2	operon0236	operon0075							-2.38211	-3.56401	-3.35914	0.0310648	0.00154149	7.60925e-08	TRUE	0.0883596	0.153283	0.115723	0.486652	0.357027	0.488909	FALSE	138.949
agat-gene-377	paeni_NIB01_000383	417965	418888	-		protein_coding					ABC transporter permease		Branched-chain amino acid transport system / permease component	rbsC-2	-	-	ko:K02057	-	M00221	-	-	ko00000,ko00002,ko02000	3.A.1.2	-	-	BPD_transp_2	operon0236	operon0075							-2.54027	-3.69999	-3.47196	0.0272029	0.00154149	6.72363e-08	TRUE	0.216892	0.258268	0.183405	0.262738	0.351966	0.440425	FALSE	142.427
agat-gene-380	paeni_NIB01_000386	421540	422571	-		protein_coding					BMP family protein		ABC-type transport system, periplasmic component surface lipoprotein	bmpC	-	-	ko:K02058,ko:K07335	-	M00221	-	-	ko00000,ko00002,ko02000	3.A.1.2	-	-	Bmp	operon0236	operon0075							-1.20802	-2.53416	-2.19787	0.11262	0.0160271	0.000731323	FALSE	1.06812	1.13974	1.07822	7.84416e-07	9.29245e-05	7.24116e-11	TRUE	404.216
agat-gene-375	paeni_NIB01_000381	416487	417245	-		protein_coding					nucleoside phosphorylase		Phosphorylase superfamily	udp	-	2.4.2.1,2.4.2.3	ko:K00757,ko:K03784	ko00230,ko00240,ko00760,ko00983,ko01100,ko01110,map00230,map00240,map00760,map00983,map01100,map01110	-	R01561,R01863,R01876,R01969,R02147,R02294,R02295,R02297,R02484,R02557,R02748,R08229,R08368,R10244	RC00033,RC00063,RC00122	ko00000,ko00001,ko01000	-	-	-	PNP_UDP_1	operon0236	operon0075							-2.07721	-3.05104	-2.79108	0.0299785	0.00362492	7.35002e-06	TRUE	0.0549285	0.0387292	0.0102122	0.685161	0.843516	0.962516	FALSE	172.564
agat-gene-376	paeni_NIB01_000382	417247	417918	-		protein_coding					sulfite oxidase-like oxidoreductase		Oxidoreductase	-	-	-	-	-	-	-	-	-	-	-	-	Mo-co_dimer,Oxidored_molyb	operon0236	operon0075							-2.71796	-3.82121	-3.57814	0.0309819	0.00135809	3.14457e-08	TRUE	0.0109488	0.284027	0.209137	0.953277	0.28323	0.359551	FALSE	89.3837
agat-gene-381	paeni_NIB01_000387	422850	424292	+		protein_coding					hypothetical protein		-	-	-	-	-	-	-	-	-	-	-	-	-	-	operon0237								1.48917	0.877841	0.74667	0.00776927	0.120211	0.0941068	FALSE	0.409736	0.553942	0.445293	0.0125507	0.0551157	0.0518967	FALSE	48.3065
agat-gene-382	paeni_NIB01_000388	424532	425164	+		protein_coding					DUF5317 domain-containing protein		Family of unknown function (DUF5317)	M1-582	-	-	-	-	-	-	-	-	-	-	-	DUF5317	operon0238								2.01973	2.20175	2.13038	6.67051e-05	7.38774e-05	1.31657e-12	TRUE	0.611498	0.678425	0.619963	0.000114181	0.00143255	4.59673e-05	FALSE	92.9108
agat-gene-383	paeni_NIB01_000389	425416	427248	+		protein_coding					diguanylate cyclase		HD family phosphohydrolase	M1-580	-	-	-	-	-	-	-	-	-	-	-	GGDEF,HD,HD_5,PAS_3,PAS_9	operon0239								0.603047	0.56976	0.552344	0.00177454	0.00543973	0.000265829	FALSE	-0.575865	-0.442702	-0.430592	0.000651366	0.0275641	0.0119268	FALSE	92.4538
agat-gene-384	paeni_NIB01_000390	427376	427543	-		protein_coding					hypothetical protein		-	-	-	-	-	-	-	-	-	-	-	-	-	-	operon0240								3.8739	4.37666	4.27258	1.46278e-05	3.67009e-05	6.2691e-20	TRUE	0.192657	0.0931892	0.0364738	0.562282	0.854788	0.91831	FALSE	59.1778
agat-gene-385	paeni_NIB01_000391	427846	428676	+		protein_coding	integral component of membrane|0016021||IEA			GO:0016021	histidine kinase		Histidine kinase	-	-	2.7.13.3	ko:K07674	ko02020,map02020	M00472	-	-	ko00000,ko00001,ko00002,ko01000,ko01001,ko02022	-	-	-	HATPase_c,HATPase_c_2,HisKA_3,MFS_1	operon0241	operon0076							-1.18314	-1.20298	-1.21791	0.000469216	0.000378402	3.18611e-11	TRUE	-0.187775	0.0951267	0.0494204	0.521624	0.760127	0.86419	FALSE	17.8625
agat-gene-386	paeni_NIB01_000392	428678	429334	+		protein_coding					response regulator transcription factor		COG2197 Response regulator containing a CheY-like receiver domain and an HTH DNA-binding domain	-	-	-	ko:K02479,ko:K07684	ko02020,map02020	M00471	-	-	ko00000,ko00001,ko00002,ko02022	-	-	-	GerE,Response_reg	operon0241	operon0076							-0.840512	-0.7729	-0.77382	0.00425137	0.00608529	9.58228e-05	FALSE	-0.0443581	0.13939	NA	0.907291	0.724635	NA	#VALUE!	13.2218
agat-gene-387	paeni_NIB01_000393	429515	431209	+		protein_coding	periplasmic space|0042597||IEA			GO:0042597	copper resistance protein CopC		CopC domain	ycnJ	GO:0005575,GO:0005623,GO:0005886,GO:0016020,GO:0044464,GO:0071944	-	ko:K07156,ko:K14166	-	-	-	-	ko00000,ko02000	9.B.62.2	-	-	CopC,CopD,YtkA	operon0242								-3.43162	-3.40414	-3.33672	0.00055834	3.19915e-05	5.58152e-18	TRUE	-0.628979	-0.676142	-0.662912	0.000106621	0.0018038	3.92296e-05	FALSE	329.305
agat-gene-388	paeni_NIB01_000394	431453	432223	+		protein_coding					DUF1775 domain-containing protein		Domain of unkown function (DUF1775)	ycnI	-	-	ko:K07040	-	-	-	-	ko00000	-	-	-	DUF1775	operon0242								-3.39547	-3.31825	-3.22742	0.000356991	4.67813e-05	1.25405e-15	TRUE	-0.597181	-0.691139	-0.678433	0.000121579	0.00149765	2.65879e-05	FALSE	304.413
agat-gene-389	paeni_NIB01_000395	432417	432719	-		protein_coding					hypothetical protein		-	-	-	-	-	-	-	-	-	-	-	-	-	-	operon0243								-0.761011	-0.850805	NA	0.305544	0.109004	NA	#VALUE!	NA	NA	NA	NA	NA	NA	#VALUE!	1.33257
agat-gene-390	paeni_NIB01_000396	433048	433194	-		protein_coding					hypothetical protein																operon0244								-2.34152	-1.52875	NA	0.00340688	0.0302928	NA	#VALUE!	NA	NA	NA	NA	NA	NA	#VALUE!	2.88952
agat-gene-391	paeni_NIB01_000397	433445	434731	-		protein_coding		transposase activity|0004803||IEA		GO:0004803	IS110 family transposase		transposase IS116 IS110 IS902 family protein	-	-	-	-	-	-	-	-	-	-	-	-	DEDD_Tnp_IS110,Transposase_20	operon0245								#N/A	#N/A	#N/A	#N/A	#N/A	#N/A	#N/A	NA	NA	NA	NA	NA	NA	#VALUE!	NA
agat-gene-392	paeni_NIB01_000398	434881	436602	-		protein_coding					ABC transporter ATP-binding protein/permease		ABC-type multidrug transport system ATPase and permease	-	-	-	ko:K06147,ko:K06148	-	-	-	-	ko00000,ko02000	3.A.1,3.A.1.106,3.A.1.109,3.A.1.21	-	-	ABC_membrane,ABC_tran	operon0246	operon0077							-0.788148	-0.666837	-0.641558	0.0420497	0.0370945	0.0150531	FALSE	NA	NA	NA	NA	NA	NA	#VALUE!	16.6695
agat-gene-393	paeni_NIB01_000399	436692	437084	-		protein_coding					hypothetical protein		-	-	-	-	-	-	-	-	-	-	-	-	-	-	operon0247	operon0077							-0.669078	-0.271487	NA	0.358265	0.622386	NA	#VALUE!	NA	NA	NA	NA	NA	NA	#VALUE!	2.05496
agat-gene-394	paeni_NIB01_000400	437077	437502	-		protein_coding					hypothetical protein																operon0247	operon0077							0.156945	0.243248	0.231842	0.598853	0.444906	0.418388	FALSE	NA	NA	NA	NA	NA	NA	#VALUE!	2.32585
agat-gene-396	paeni_NIB01_000402	438456	438899	-		protein_coding					hypothetical protein		-	-	-	-	-	-	-	-	-	-	-	-	-	Thioredoxin_8	operon0248	operon0078							-0.303691	-0.318912	NA	0.525336	0.428061	NA	#VALUE!	NA	NA	NA	NA	NA	NA	#VALUE!	3.393
agat-gene-395	paeni_NIB01_000401	438001	438426	-		protein_coding					hypothetical protein		-	-	-	-	-	-	-	-	-	-	-	-	-	-	operon0248	operon0078							0.0352794	0.205732	0.158138	0.94602	0.629314	0.64227	FALSE	NA	NA	NA	NA	NA	NA	#VALUE!	4.61065
agat-gene-397	paeni_NIB01_000403	439115	440371	-		protein_coding					DUF445 domain-containing protein		Protein of unknown function (DUF445)	yjiN	-	-	-	-	-	-	-	-	-	-	-	DUF445	operon0249								0.545639	0.52943	0.515655	0.000109665	0.000659832	3.10079e-14	FALSE	0.411767	0.438419	0.393363	0.00232576	0.00700873	0.00198396	FALSE	138.377
agat-gene-398	paeni_NIB01_000404	440708	441535	+		protein_coding					aldo/keto reductase		Reductase	yvgN	-	-	-	-	-	-	-	-	-	-	-	Aldo_ket_red	operon0250								2.06597	2.17212	2.15209	3.1173e-07	3.67977e-07	4.92193e-50	TRUE	-1.5438	-1.60922	-1.57738	6.84574e-08	8.26225e-05	2.47653e-12	TRUE	51.1632
agat-gene-399	paeni_NIB01_000405	441863	442321	-		protein_coding					cupin domain-containing protein		Cupin superfamily (DUF985)	MA20_39615	-	-	ko:K09705	-	-	-	-	ko00000	-	-	-	Cupin_5	operon0251								0.0765962	0.022054	0.00961961	0.665824	0.907562	0.969645	FALSE	0.415083	0.45342	0.37527	0.0142633	0.0505718	0.0573894	FALSE	97.2533
agat-gene-400	paeni_NIB01_000406	442580	443431	+		protein_coding					AraC family transcriptional regulator		AraC family transcriptional regulator	yfiF7	-	3.2.2.21	ko:K13529,ko:K15051	ko03410,map03410	-	-	-	ko00000,ko00001,ko01000,ko03000,ko03400	-	-	-	Ada_Zn_binding,AraC_binding,Endonuclea_NS_2,HTH_18,HTH_AraC	operon0252								1.60774	1.722	1.65268	0.00169721	0.000251877	3.30194e-09	TRUE	NA	NA	NA	NA	NA	NA	#VALUE!	4.62433
agat-gene-401	paeni_NIB01_000407	443547	445160	-		protein_coding					glycoside hydrolase family 28 protein		Belongs to the glycosyl hydrolase 28 family	-	-	-	ko:K19172	-	-	-	-	ko00000,ko02048	-	-	-	Glyco_hydro_28,Lipase_GDSL_2,Pectate_lyase_3	operon0253								0.471867	0.622727	0.532405	0.455047	0.176286	0.162276	FALSE	NA	NA	NA	NA	NA	NA	#VALUE!	14.0071
agat-gene-403	paeni_NIB01_000409	446385	447215	+		protein_coding					ABC transporter substrate-binding protein		Amino acid ABC transporter substrate-binding protein	glnH	-	-	ko:K09969,ko:K10039	ko02010,map02010	M00228,M00232	-	-	ko00000,ko00001,ko00002,ko02000	3.A.1.3,3.A.1.3.18,3.A.1.3.7,3.A.1.3.8	-	-	SBP_bac_3	operon0254	operon0079							5.47783	5.69324	5.61055	5.10556e-07	1.94409e-06	1.23141e-45	TRUE	NA	NA	NA	NA	NA	NA	#VALUE!	0.788052
agat-gene-402	paeni_NIB01_000408	445624	446352	+		protein_coding					amino acid ABC transporter ATP-binding protein		ABC transporter	glnQ	-	3.6.3.21	ko:K02028,ko:K10041	ko02010,map02010	M00228,M00236	-	-	ko00000,ko00001,ko00002,ko01000,ko02000	3.A.1.3	-	-	ABC_tran	operon0254	operon0079							6.30322	6.52246	6.41562	2.04808e-06	2.67381e-06	3.81652e-44	TRUE	NA	NA	NA	NA	NA	NA	#VALUE!	0.3393
agat-gene-405	paeni_NIB01_000411	448161	448811	+		protein_coding					amino acid ABC transporter permease		Glutamine ABC transporter permease	glnP	GO:0003333,GO:0003674,GO:0005215,GO:0005342,GO:0005575,GO:0005623,GO:0005886,GO:0006810,GO:0006811,GO:0006820,GO:0006865,GO:0008150,GO:0008509,GO:0008514,GO:0015075,GO:0015171,GO:0015318,GO:0015711,GO:0015849,GO:0016020,GO:0022857,GO:0034220,GO:0044464,GO:0046942,GO:0046943,GO:0051179,GO:0051234,GO:0055085,GO:0071702,GO:0071705,GO:0071944,GO:0098656,GO:1903825,GO:1905039	-	ko:K02029,ko:K10002,ko:K10040	ko02010,ko02020,map02010,map02020	M00228,M00230,M00236	-	-	ko00000,ko00001,ko00002,ko02000	3.A.1.3,3.A.1.3.19,3.A.1.3.4	-	-	BPD_transp_1	operon0254	operon0079							4.18694	4.4332	4.30845	7.62204e-06	1.2384e-05	4.28547e-24	TRUE	NA	NA	NA	NA	NA	NA	#VALUE!	0.905713
agat-gene-404	paeni_NIB01_000410	447318	448040	+		protein_coding					amino acid ABC transporter permease		Glutamine ABC transporter permease	gluC	GO:0003333,GO:0003674,GO:0005215,GO:0005342,GO:0005575,GO:0005623,GO:0005886,GO:0006810,GO:0006811,GO:0006820,GO:0006865,GO:0008150,GO:0008509,GO:0008514,GO:0015075,GO:0015171,GO:0015318,GO:0015711,GO:0015849,GO:0016020,GO:0022857,GO:0034220,GO:0044464,GO:0046942,GO:0046943,GO:0051179,GO:0051234,GO:0055085,GO:0071702,GO:0071705,GO:0071944,GO:0098656,GO:1903825,GO:1905039	-	ko:K10006,ko:K10040	ko02010,map02010	M00228,M00233	-	-	ko00000,ko00001,ko00002,ko02000	3.A.1.3,3.A.1.3.9	-	-	BPD_transp_1	operon0254	operon0079							4.0437	4.21591	4.11814	2.54567e-06	7.2906e-06	5.96537e-28	TRUE	NA	NA	NA	NA	NA	NA	#VALUE!	1.41466
agat-gene-406	paeni_NIB01_000412	449314	450657	-		protein_coding					FAD-dependent oxidoreductase		FAD dependent oxidoreductase	-	-	-	-	-	-	-	-	-	-	-	-	FAD_oxidored	operon0255	operon0080							1.72945	1.68123	1.60121	0.00136309	0.000731971	1.02401e-06	TRUE	NA	NA	NA	NA	NA	NA	#VALUE!	8.13226
agat-gene-407	paeni_NIB01_000413	450706	451560	-		protein_coding					carbohydrate ABC transporter permease		Sugar ABC transporter ATP-binding protein	-	-	-	ko:K02026	-	M00207	-	-	ko00000,ko00002,ko02000	3.A.1.1	-	-	BPD_transp_1	operon0256	operon0080							1.50714	1.3964	1.29254	0.00788394	0.00899861	0.000751847	TRUE	NA	NA	NA	NA	NA	NA	#VALUE!	1.89078
agat-gene-409	paeni_NIB01_000415	452493	453194	-		protein_coding					hypothetical protein		Converts N-acetylmannosamine-6-phosphate (ManNAc-6-P) to N-acetylglucosamine-6-phosphate (GlcNAc-6-P)	XK27_12570	-	5.1.3.9	ko:K01788	ko00520,map00520	-	R02087	RC00290	ko00000,ko00001,ko01000	-	-	-	NanE	operon0256	operon0080							2.69749	2.6667	2.60515	1.73156e-05	3.6943e-05	1.80217e-15	TRUE	NA	NA	NA	NA	NA	NA	#VALUE!	2.48182
agat-gene-411	paeni_NIB01_000417	454624	455391	-		protein_coding			phosphorelay signal transduction system|0000160||IEA	GO:0000160	response regulator		helix_turn_helix, arabinose operon control protein	-	-	-	ko:K07720	ko02020,map02020	M00519	-	-	ko00000,ko00001,ko00002,ko02022	-	-	-	HATPase_c,HTH_18,HTH_AraC,HisKA,Response_reg	operon0256	operon0081							1.26439	1.21529	NA	0.00172008	0.00582038	NA	#VALUE!	NA	NA	NA	NA	NA	NA	#VALUE!	0.476115
agat-gene-412	paeni_NIB01_000418	455397	457220	-		protein_coding					sensor histidine kinase		Histidine kinase	-	-	2.7.13.3	ko:K07718	ko02020,map02020	M00519	-	-	ko00000,ko00001,ko00002,ko01000,ko01001,ko02022	-	-	-	HAMP,HATPase_c,His_kinase,dCache_1	operon0256	operon0081							0.0607859	0.564948	NA	0.936015	0.30869	NA	#VALUE!	NA	NA	NA	NA	NA	NA	#VALUE!	1.87983
agat-gene-408	paeni_NIB01_000414	451544	452458	-		protein_coding					sugar ABC transporter permease		Binding-protein-dependent transport system inner membrane component	-	-	-	ko:K02025,ko:K15771	ko02010,map02010	M00207,M00491	-	-	ko00000,ko00001,ko00002,ko02000	3.A.1.1,3.A.1.1.16,3.A.1.1.2	-	-	BPD_transp_1	operon0256	operon0080							2.71149	2.6119	2.54383	2.18555e-05	4.4824e-05	1.07463e-14	TRUE	NA	NA	NA	NA	NA	NA	#VALUE!	2.73356
agat-gene-410	paeni_NIB01_000416	453225	454520	-		protein_coding					sugar ABC transporter substrate-binding protein		COG1653 ABC-type sugar transport system, periplasmic component	-	-	-	ko:K02027	-	M00207	-	-	ko00000,ko00002,ko02000	3.A.1.1	-	-	SBP_bac_1,SBP_bac_8	operon0256	operon0080							2.65499	2.71719	2.62725	3.59003e-05	0.000114282	1.06208e-11	TRUE	NA	NA	NA	NA	NA	NA	#VALUE!	4.52035
agat-gene-413	paeni_NIB01_000419	457429	458322	-		protein_coding		catalytic activity|0003824||IEA		GO:0003824	NAD-dependent epimerase/dehydratase family protein		COG0451 Nucleoside-diphosphate-sugar epimerases	-	-	-	-	-	-	-	-	-	-	-	-	Epimerase	operon0257								0.334468	0.414894	0.354712	0.564989	0.303825	0.312341	FALSE	0.731205	0.416643	0.244053	0.0651976	0.321519	0.404551	FALSE	9.77951
agat-gene-414	paeni_NIB01_000420	458465	458653	-		protein_coding					aspartyl-phosphate phosphatase Spo0E family protein		Spo0E like sporulation regulatory protein	-	-	-	-	-	-	-	-	-	-	-	-	SpoOE-like	operon0258								-0.121404	0.0407949	0.0217428	0.835025	0.927077	0.951836	FALSE	NA	NA	NA	NA	NA	NA	#VALUE!	40.2782
agat-gene-415	paeni_NIB01_000421	459048	459836	+		protein_coding					hypothetical protein		-	-	-	-	-	-	-	-	-	-	-	-	-	DUF4878	operon0259								-1.13028	-0.845637	-0.680672	0.256546	0.209275	0.150291	FALSE	0.35399	0.431559	0.343632	0.0951306	0.0634276	0.118346	FALSE	38.9374
agat-gene-416	paeni_NIB01_000422	460060	460419	+		protein_coding					PadR family transcriptional regulator		PadR family transcriptional regulator	-	-	-	ko:K10947	-	-	-	-	ko00000,ko03000	-	-	-	PadR	operon0260	operon0082							1.82896	2.4856	2.21203	0.00372532	0.00529983	0.000115021	TRUE	NA	NA	NA	NA	NA	NA	#VALUE!	9.76309
agat-gene-417	paeni_NIB01_000423	460385	461266	+		protein_coding					permease prefix domain 1-containing protein		VanZ like family	-	-	-	-	-	-	-	-	-	-	-	-	VanZ	operon0260	operon0082							1.15544	1.76212	1.48622	0.0370428	0.0263563	0.00597295	TRUE	2.00578	2.07179	2.00007	3.49539e-07	8.76631e-06	1.27285e-16	TRUE	42.7354
agat-gene-418	paeni_NIB01_000424	461472	461576	-		protein_coding			regulation of sporulation|0043937||IEA	GO:0043937	Spo0E family sporulation regulatory protein-aspartic acid phosphatase																operon0261								0.0519813	0.684895	0.493989	0.92184	0.233536	0.282056	FALSE	NA	NA	NA	NA	NA	NA	#VALUE!	8.12405
agat-gene-420	paeni_NIB01_000426	463293	464672	-		protein_coding					helix-turn-helix transcriptional regulator		DNA-binding protein	-	-	-	-	-	-	-	-	-	-	-	-	-	operon0262	operon0083							1.02847	1.07802	1.04511	0.000372787	0.000497339	4.70307e-08	TRUE	0.733975	0.772112	0.69632	0.000344833	0.00179343	0.000217819	FALSE	18.5247
agat-gene-419	paeni_NIB01_000425	461871	463238	-		protein_coding					transcriptional regulator		DNA-binding protein	-	-	-	-	-	-	-	-	-	-	-	-	-	operon0262	operon0083							0.671337	0.691586	0.684307	0.000894821	0.00206096	2.91353e-07	FALSE	0.397848	0.416047	0.355449	0.0159822	0.0238656	0.0401056	FALSE	29.4644
agat-gene-421	paeni_NIB01_000427	464939	466333	-		protein_coding					transcriptional regulator		DNA-binding protein	-	-	-	-	-	-	-	-	-	-	-	-	-	operon0263								0.215424	0.222395	0.209347	0.227105	0.169759	0.179388	FALSE	0.663507	0.697704	0.644576	6.4726e-05	0.000600025	3.61331e-06	FALSE	75.3274
agat-gene-422	paeni_NIB01_000428	466603	467727	+		protein_coding					LLM class flavin-dependent oxidoreductase		Luciferase-like monooxygenase	-	-	-	-	-	-	-	-	-	-	-	-	Bac_luciferase	operon0264								-0.282807	-0.308129	-0.315541	0.113761	0.0522408	0.021909	FALSE	0.293222	0.236852	0.200682	0.0067648	0.0869758	0.103617	FALSE	44.8424
agat-gene-423	paeni_NIB01_000429	467826	468407	-		protein_coding					TetR/AcrR family transcriptional regulator		Transcriptional regulator	ydeS	GO:0000976,GO:0001067,GO:0003674,GO:0003676,GO:0003677,GO:0003690,GO:0003700,GO:0005488,GO:0005575,GO:0005622,GO:0005623,GO:0005737,GO:0005829,GO:0006355,GO:0008150,GO:0009889,GO:0010468,GO:0010556,GO:0019219,GO:0019222,GO:0031323,GO:0031326,GO:0043565,GO:0044212,GO:0044424,GO:0044444,GO:0044464,GO:0050789,GO:0050794,GO:0051171,GO:0051252,GO:0060255,GO:0065007,GO:0080090,GO:0097159,GO:0140110,GO:…	-	-	-	-	-	-	-	-	-	-	TetR_C_11,TetR_N	operon0265								-0.307338	-0.256344	-0.25996	0.430558	0.481743	0.405644	FALSE	0.145565	0.673393	0.508489	0.672054	0.0667468	0.0666022	FALSE	15.1536
agat-gene-424	paeni_NIB01_000430	468671	469876	+		protein_coding					MFS transporter		MFS transporter	ydeR	-	-	ko:K08224	-	-	-	-	ko00000,ko02000	2.A.1.36	-	-	MFS_1,Sugar_tr	operon0266								-1.48517	-1.55544	-1.56363	4.99539e-05	1.78117e-05	7.10935e-16	TRUE	0.0292156	-0.321504	-0.235996	0.929543	0.381806	0.400141	FALSE	18.1854
agat-gene-425	paeni_NIB01_000431	469944	470354	-		protein_coding					DUF2000 domain-containing protein		Protein of unknown function (DUF2000)	-	-	-	-	-	-	-	-	-	-	-	-	DUF2000	operon0267	operon0084							-0.239535	-0.192894	-0.219179	0.33897	0.359811	0.276965	FALSE	-0.13229	-0.0296355	-0.0324617	0.786397	0.949616	0.918332	FALSE	11.1559
agat-gene-426	paeni_NIB01_000432	470351	470914	-		protein_coding					hypothetical protein		-	-	-	-	-	-	-	-	-	-	-	-	-	-	operon0267	operon0084							0.0417936	-0.104747	-0.112841	0.899817	0.683481	0.642049	FALSE	-0.124801	-0.063732	-0.0672942	0.672054	0.839332	0.809452	FALSE	9.27056
agat-gene-427	paeni_NIB01_000433	471099	472340	+		protein_coding					ATP-grasp domain-containing protein		ATP-grasp domain	XK27_05680	-	6.3.2.4	ko:K01921	ko00473,ko00550,ko01100,ko01502,map00473,map00550,map01100,map01502	-	R01150	RC00064,RC00141	ko00000,ko00001,ko01000,ko01011	-	-	-	ATP-grasp_3,ATP-grasp_4,CPSase_L_D2	operon0268	operon0085							0.0456806	-0.139278	-0.148911	0.931604	0.730258	0.671041	FALSE	NA	NA	NA	NA	NA	NA	#VALUE!	3.95668
agat-gene-428	paeni_NIB01_000434	472406	473680	+		protein_coding			transmembrane transport|0055085||IEA	GO:0055085	MFS transporter		Major Facilitator Superfamily	-	-	-	-	-	-	-	-	-	-	-	-	MFS_1,MFS_3,PUCC,Sugar_tr	operon0269	operon0085							-0.170359	-0.136484	NA	0.801212	0.780778	NA	#VALUE!	NA	NA	NA	NA	NA	NA	#VALUE!	4.64075
agat-gene-429	paeni_NIB01_000435	473807	474850	-		protein_coding					alkene reductase		COG1902 NADH flavin oxidoreductases, Old Yellow Enzyme family	-	-	-	ko:K10680	ko00633,ko01120,map00633,map01120	-	R08014,R08017,R08042	RC00250	ko00000,ko00001,ko01000	-	-	-	Oxidored_FMN	operon0270								-1.10959	-0.941698	-0.933141	0.00599664	0.00722711	0.000149829	FALSE	NA	NA	NA	NA	NA	NA	#VALUE!	11.1258
agat-gene-430	paeni_NIB01_000436	475055	475918	+		protein_coding					LysR family transcriptional regulator		Transcriptional regulator	-	-	-	-	-	-	-	-	-	-	-	-	HTH_1,LysR_substrate	operon0271								-0.39002	-0.543966	-0.539357	0.186622	0.0213824	0.0115742	FALSE	1.30614	1.38538	1.28592	3.55124e-05	0.000207636	4.65143e-07	TRUE	17.1976
agat-gene-431	paeni_NIB01_000437	476146	476757	+		protein_coding					esterase		Lipase (class 2)	lip	GO:0003674,GO:0003824,GO:0004806,GO:0005575,GO:0005576,GO:0016298,GO:0016787,GO:0016788,GO:0052689	3.1.1.3	ko:K01046	ko00561,ko01100,map00561,map01100	M00098	R02250,R02687	RC00020,RC00037,RC00041,RC00094	ko00000,ko00001,ko00002,ko01000	-	-	-	Lipase_2	operon0272								-0.414263	-0.584017	-0.569407	0.262685	0.0535453	0.0216741	FALSE	0.0858387	0.0324939	0.00585873	0.671973	0.889328	0.981553	FALSE	18.8613
agat-gene-432	paeni_NIB01_000438	477271	478377	-		protein_coding					Glu/Leu/Phe/Val dehydrogenase		Belongs to the Glu Leu Phe Val dehydrogenases family	ldh	-	1.4.1.9	ko:K00263	ko00280,ko00290,ko01100,ko01110,ko01130,map00280,map00290,map01100,map01110,map01130	-	R01088,R01434,R02196	RC00006,RC00036	ko00000,ko00001,ko01000	-	-	-	ELFV_dehydrog,ELFV_dehydrog_N	operon0273								-2.90417	-2.90342	-2.88834	7.29852e-07	1.28685e-06	3.06159e-42	TRUE	-0.832696	-0.812845	-0.805765	2.25128e-05	0.000474736	4.15556e-07	FALSE	233.014
agat-gene-433	paeni_NIB01_000439	478559	479188	-	cdaS	protein_coding					sporulation-specific diadenylate cyclase CdaS		Catalyzes the condensation of 2 ATP molecules into cyclic di-AMP (c-di-AMP), a second messenger used to regulate differing processes in different bacteria	dacA	GO:0003674,GO:0003824,GO:0004016,GO:0009975,GO:0016829,GO:0016849	2.7.7.85	ko:K18672	-	-	-	-	ko00000,ko01000	-	-	-	DisA_N,YojJ	operon0274								2.62527	2.60736	2.55196	5.45317e-06	4.03056e-06	1.03539e-27	TRUE	-0.0753482	-0.0876169	-0.068168	0.792002	0.819002	0.815759	FALSE	1.18208
agat-gene-434	paeni_NIB01_000440	479335	480843	-		protein_coding					DUF6359 domain-containing protein		lipolytic protein G-D-S-L family	M1-554	-	-	-	-	-	-	-	-	-	-	-	ABC_transp_aux,He_PIG	operon0275								1.46215	1.53962	1.41159	0.0295428	0.00637004	0.000332958	TRUE	0.170802	0.0614011	0.0312148	0.369554	0.825037	0.905803	FALSE	10.0367
agat-gene-435	paeni_NIB01_000441	481062	481355	+		protein_coding					hypothetical protein		-	-	-	-	-	-	-	-	-	-	-	-	-	-	operon0276								2.19291	2.42652	NA	0.00632475	0.0020236	NA	#VALUE!	NA	NA	NA	NA	NA	NA	#VALUE!	0.227112
agat-gene-436	paeni_NIB01_000442	481509	481664	+		protein_coding					hypothetical protein		-	-	-	-	-	-	-	-	-	-	-	-	-	-	operon0277	operon0086							-0.112584	0.014979	-0.00131329	0.881836	0.978492	0.993704	FALSE	0.282437	0.0667877	0.0354472	0.258141	0.862242	0.906332	FALSE	34.8768
agat-gene-437	paeni_NIB01_000443	481751	482293	+		protein_coding					GNAT family N-acetyltransferase		Acetyltransferase (GNAT) domain	p20	-	2.3.1.128	ko:K03790	-	-	-	-	ko00000,ko01000,ko03009	-	-	-	Acetyltransf_3	operon0278	operon0086							-0.819365	-0.95944	-0.935086	0.0706006	0.00626876	0.000411192	FALSE	-0.0198262	0.051402	0.0188031	0.938231	0.843117	0.946879	FALSE	14.2889
agat-gene-438	paeni_NIB01_000444	482426	483202	-		protein_coding					Crp/Fnr family transcriptional regulator		cAMP-binding proteins - catabolite gene activator and regulatory subunit of cAMP-dependent protein kinases	fnr	-	-	ko:K10914	ko02020,ko02024,ko02025,ko02026,ko05111,map02020,map02024,map02025,map02026,map05111	-	-	-	ko00000,ko00001,ko03000	-	-	-	HTH_Crp_2,cNMP_binding	operon0279								-0.149769	-0.270609	-0.203263	0.875748	0.713851	0.684734	FALSE	0.750528	0.950905	0.817038	0.00073317	0.00835316	0.00160292	FALSE	41.6819
agat-gene-439	paeni_NIB01_000445	483580	484011	+		protein_coding					GAF domain-containing protein		GAF domain	nreA	-	-	ko:K10851,ko:K21685	ko02020,map02020	-	-	-	ko00000,ko00001,ko03000	-	-	-	BTAD,GAF_2,GerE,Guanylate_cyc,Trans_reg_C,Yop-YscD_cpl	operon0280								-0.822477	-0.734535	-0.612942	0.42875	0.202842	0.158044	FALSE	0.714496	0.7239	0.65101	9.98234e-05	0.00237659	0.0002538	FALSE	14.0728
agat-gene-441	paeni_NIB01_000447	484816	485928	+		protein_coding					PAS domain S-box protein		Histidine kinase	M1-535	-	2.7.13.3	ko:K03320,ko:K07675,ko:K07683	ko02020,map02020	M00473,M00483	-	-	ko00000,ko00001,ko00002,ko01000,ko01001,ko02000,ko02022	1.A.11	-	-	HAMP,HATPase_c,HisKA_3,PAS,PAS_3,PAS_9	operon0281	operon0087							-1.90471	-1.89381	-1.8854	2.74496e-05	2.9936e-05	2.46219e-23	TRUE	-0.32085	-0.335324	-0.320052	0.0699857	0.111218	0.0981097	FALSE	60.4748
agat-gene-440	paeni_NIB01_000446	484173	484823	+		protein_coding					response regulator transcription factor		LuxR family transcriptional regulator	nreC	-	-	ko:K02282,ko:K07696	ko02020,map02020	M00483	-	-	ko00000,ko00001,ko00002,ko02022,ko02035,ko02044	-	-	-	GerE,Response_reg	operon0281	operon0087							-1.97851	-1.95806	-1.91856	1.77915e-05	1.16584e-05	5.66174e-28	TRUE	0.126419	0.0369695	0.00752151	0.619507	0.895798	0.980038	FALSE	31.1855
agat-gene-444	paeni_NIB01_000450	487309	487854	+		protein_coding					chromate transporter		Chromate transporter	ywrA	-	-	ko:K07240	-	-	-	-	ko00000,ko02000	2.A.51.1	-	-	Chromate_transp	operon0282	operon0088							-1.44872	-1.53397	-1.53443	0.000244502	3.00778e-05	5.35474e-13	TRUE	0.490444	0.74236	NA	0.264669	0.128601	NA	#VALUE!	19.7287
agat-gene-443	paeni_NIB01_000449	486718	487305	+		protein_coding					chromate transporter		transporter	ywrB	-	-	ko:K07240	-	-	-	-	ko00000,ko02000	2.A.51.1	-	iYO844.BSU36120	Chromate_transp	operon0282	operon0088							-1.77591	-1.79946	-1.8015	7.88872e-05	8.46943e-06	8.41692e-17	TRUE	0.255068	0.302738	0.200487	0.324832	0.28329	0.457944	FALSE	19.9859
agat-gene-442	paeni_NIB01_000448	486211	486705	+		protein_coding					Lrp/AsnC family transcriptional regulator		helix_turn_helix ASNC type	ywrC	GO:0001101,GO:0003674,GO:0003676,GO:0003677,GO:0003700,GO:0005488,GO:0005575,GO:0005622,GO:0005623,GO:0005737,GO:0005829,GO:0006355,GO:0008150,GO:0009889,GO:0010033,GO:0010243,GO:0010468,GO:0010556,GO:0019219,GO:0019222,GO:0031323,GO:0031326,GO:0042221,GO:0043200,GO:0043565,GO:0044424,GO:0044444,GO:0044464,GO:0050789,GO:0050794,GO:0050896,GO:0051171,GO:0051252,GO:0060255,GO:0065007,GO:0080090,GO:…	-	ko:K03719	-	-	-	-	ko00000,ko03000,ko03036	-	-	-	AsnC_trans_reg,HTH_24,HTH_AsnC-type	operon0282	operon0088							-1.32378	-1.39078	-1.37339	0.000555725	0.000101489	6.88405e-12	TRUE	0.514577	0.670761	0.484534	0.127953	0.087638	0.102294	FALSE	19.2088
agat-gene-445	paeni_NIB01_000451	488066	490411	-		protein_coding					Ig-like domain-containing protein		Bacterial Ig-like domain 2	ligA1	-	-	-	-	-	-	-	-	-	-	-	Big_2,DUF3494	operon0283								-2.32902	-2.14871	-2.11267	4.43717e-06	5.85473e-06	1.17192e-21	TRUE	-0.917931	-0.931309	-0.911687	1.07087e-05	0.000520856	5.31538e-07	FALSE	500.049
agat-gene-446	paeni_NIB01_000452	490649	491269	+		protein_coding					class I SAM-dependent methyltransferase		Methyltransferase domain	-	-	-	-	-	-	-	-	-	-	-	-	Methyltransf_11,Methyltransf_23,Methyltransf_25,Methyltransf_32	operon0284								0.963239	0.867625	0.796157	0.023947	0.0227983	0.0100065	FALSE	NA	NA	NA	NA	NA	NA	#VALUE!	1.49949
agat-gene-447	paeni_NIB01_000453	491417	492553	-		protein_coding					glycoside hydrolase family 88 protein		Glycosyl hydrolase	ugl	-	3.2.1.180	ko:K18581	-	-	R10867	RC00049,RC02427	ko00000,ko01000	-	GH88	-	Glyco_hydro_88	operon0285	operon0089							2.676	2.71753	2.68842	1.31623e-07	2.13456e-07	9.26863e-80	TRUE	-0.719657	-0.885074	-0.726433	0.0403561	0.0291569	0.0185628	FALSE	6.45765
agat-gene-448	paeni_NIB01_000454	492573	494516	-		protein_coding					glycosyl hydrolase		unsaturated rhamnogalacturonyl hydrolase activity	-	-	-	-	-	-	-	-	-	-	-	-	-	operon0285	operon0089							2.39476	2.43066	2.40288	1.14436e-07	2.25022e-07	9.88201e-74	TRUE	NA	NA	NA	NA	NA	NA	#VALUE!	13.4817
agat-gene-449	paeni_NIB01_000455	494536	496557	-		protein_coding					heparinase II/III-family protein		Heparinase II/III-like protein	-	-	-	-	-	-	-	-	-	-	-	-	Hepar_II_III	operon0285	operon0089							2.21476	2.34271	2.29526	1.01629e-05	1.21079e-05	2.99866e-20	TRUE	NA	NA	NA	NA	NA	NA	#VALUE!	10.0504
agat-gene-450	paeni_NIB01_000456	496769	497425	-		protein_coding					SGNH/GDSL hydrolase family protein		g-d-s-l family	ypmR	-	-	-	-	-	-	-	-	-	-	-	Lipase_GDSL_2	operon0286								-0.016148	-0.0877411	-0.100483	0.908064	0.554163	0.45683	FALSE	-0.735717	-0.613281	-0.609158	5.46064e-05	0.0018728	2.66845e-05	FALSE	81.0353
agat-gene-452	paeni_NIB01_000458	497891	498565	-		protein_coding					AzlC family ABC transporter permease		branched-chain amino acid	azlC	-	-	-	-	-	-	-	-	-	-	-	AzlC	operon0287	operon0090							-3.4073	-3.53118	-3.5131	5.26332e-06	9.1613e-07	5.44168e-36	TRUE	NA	NA	NA	NA	NA	NA	#VALUE!	38.1384
agat-gene-451	paeni_NIB01_000457	497568	497900	-		protein_coding					AzlD domain-containing protein		branched-chain amino acid	azlD	-	-	-	-	-	-	-	-	-	-	-	AzlD	operon0287	operon0090							-3.99266	-3.87287	NA	3.93671e-05	5.522e-06	NA	#VALUE!	NA	NA	NA	NA	NA	NA	#VALUE!	16.4205
agat-gene-453	paeni_NIB01_000459	498850	500823	-		protein_coding					methyl-accepting chemotaxis protein		chemotaxis protein	-	-	-	ko:K03406	ko02020,ko02030,map02020,map02030	-	-	-	ko00000,ko00001,ko02035	-	-	-	HAMP,MCPsignal,dCache_1	operon0288								-2.94448	-2.78791	-2.70901	8.76665e-06	2.36631e-05	2.06306e-16	TRUE	-0.484137	-0.714914	-0.649902	0.0357754	0.0156905	0.00554505	FALSE	109.101
agat-gene-454	paeni_NIB01_000460	501132	502487	+		protein_coding					serine hydrolase		Beta-lactamase	pbpX	-	-	-	-	-	-	-	-	-	-	-	Beta-lactamase,Cu_amine_oxidN1	operon0289								1.12078	1.00336	0.96975	0.00170919	0.000512826	9.75684e-07	FALSE	0.905048	0.944408	0.889065	2.03633e-06	0.00013137	9.72298e-10	FALSE	67.2225
agat-gene-455	paeni_NIB01_000461	502607	504298	-	nagZ	protein_coding		hydrolase activity, hydrolyzing O-glycosyl compounds|0004553||IEA	carbohydrate metabolic process|0005975||IEA	GO:0005975, GO:0004553	beta-N-acetylhexosaminidase		Glycoside hydrolase family 3	-	-	3.2.1.52	ko:K01207	ko00520,ko00531,ko01100,ko01501,map00520,map00531,map01100,map01501	M00628	R00022,R05963,R07809,R07810,R10831	RC00049	ko00000,ko00001,ko00002,ko01000	-	-	-	Glyco_hydro_3,Glyco_hydro_3_C	operon0290	operon0091							3.6858	3.79754	3.75369	3.31565e-07	1.69714e-06	4.22389e-36	TRUE	-0.279001	-0.424083	-0.376132	0.299902	0.112276	0.107238	FALSE	20.7794
agat-gene-459	paeni_NIB01_000465	507449	508282	-		protein_coding					carbohydrate ABC transporter permease		Sugar ABC transporter permease	araQ	-	-	ko:K02026,ko:K10190	ko02010,map02010	M00199,M00207	-	-	ko00000,ko00001,ko00002,ko02000	3.A.1.1,3.A.1.1.4	-	-	BPD_transp_1	operon0290	operon0091							4.47681	4.50156	4.4719	3.02321e-08	1.33857e-07	3.41911e-88	TRUE	NA	NA	NA	NA	NA	NA	#VALUE!	4.33976
agat-gene-456	paeni_NIB01_000462	504368	505534	-		protein_coding					DUF1343 domain-containing protein		Protein of unknown function (DUF1343)	ybbC	-	3.2.1.52	ko:K01207	ko00520,ko00531,ko01100,ko01501,map00520,map00531,map01100,map01501	M00628	R00022,R05963,R07809,R07810,R10831	RC00049	ko00000,ko00001,ko00002,ko01000	-	-	-	DUF1343	operon0290	operon0091							4.051	4.09483	4.06405	3.95742e-08	2.25597e-07	1.26163e-67	TRUE	NA	NA	-0.589682	NA	NA	0.0630422	#VALUE!	8.85464
agat-gene-461	paeni_NIB01_000467	509326	510678	-		protein_coding					extracellular solute-binding protein		Sugar ABC transporter substrate-binding protein	-	-	-	ko:K02027	-	M00207	-	-	ko00000,ko00002,ko02000	3.A.1.1	-	-	SBP_bac_1,SBP_bac_8	operon0290	operon0091							4.65227	4.72989	4.70693	1.48442e-08	5.78035e-08	5.42719e-113	TRUE	0.691626	0.709227	0.573776	0.0203331	0.0308597	0.0298848	FALSE	7.5549
agat-gene-457	paeni_NIB01_000463	505534	506244	-		protein_coding					hypothetical protein		-	-	-	-	-	-	-	-	-	-	-	-	-	-	operon0290	operon0091							4.51592	4.54722	4.51171	6.91197e-08	2.94901e-07	7.47066e-68	TRUE	NA	NA	NA	NA	NA	NA	#VALUE!	5.24274
agat-gene-458	paeni_NIB01_000464	506290	507399	-	ugpC	protein_coding		ATP binding|0005524||IEA, ABC-type transporter activity|0140359||IEA		GO:0005524, GO:0140359	sn-glycerol-3-phosphate ABC transporter ATP-binding protein UgpC		Belongs to the ABC transporter superfamily	ugpC	-	-	ko:K10112	ko02010,map02010	M00194,M00196,M00197,M00200,M00201,M00206,M00207,M00491,M00602,M00605,M00606	-	-	ko00000,ko00001,ko00002,ko02000	3.A.1.1	-	-	ABC_tran,TOBE,TOBE_2	operon0290	operon0091							4.58365	4.64036	4.60672	5.28517e-08	2.76973e-07	9.4768e-67	TRUE	NA	NA	NA	NA	NA	NA	#VALUE!	6.9666
agat-gene-460	paeni_NIB01_000466	508347	509270	-		protein_coding					sugar ABC transporter permease		spermidine putrescine ABC transporter, permease	-	-	-	ko:K02025,ko:K15771,ko:K17238	ko02010,map02010	M00207,M00491,M00599	-	-	ko00000,ko00001,ko00002,ko02000	3.A.1.1,3.A.1.1.16,3.A.1.1.2,3.A.1.1.38	-	-	BPD_transp_1	operon0290	operon0091							4.64802	4.75285	4.72748	2.72616e-08	9.96015e-08	1.58493e-91	TRUE	NA	NA	NA	NA	NA	NA	#VALUE!	3.92658
agat-gene-462	paeni_NIB01_000468	511040	512002	+		protein_coding					N-acetylglucosamine kinase		BadF/BadG/BcrA/BcrD ATPase family	-	GO:0000166,GO:0003674,GO:0003824,GO:0005488,GO:0005524,GO:0005975,GO:0006040,GO:0006044,GO:0006082,GO:0006793,GO:0006796,GO:0008144,GO:0008150,GO:0008152,GO:0009987,GO:0016301,GO:0016310,GO:0016740,GO:0016772,GO:0017076,GO:0019200,GO:0019752,GO:0030554,GO:0032553,GO:0032555,GO:0032559,GO:0035639,GO:0036094,GO:0043167,GO:0043168,GO:0043436,GO:0044237,GO:0044238,GO:0044262,GO:0044281,GO:0045127,GO:…	2.7.1.59	ko:K00884	ko00520,ko01100,map00520,map01100	-	R01201	RC00002,RC00017	ko00000,ko00001,ko01000	-	-	-	BcrAD_BadFG	operon0291	operon0092							3.51748	3.48272	3.45808	4.24314e-08	8.46952e-08	2.0692e-112	TRUE	NA	NA	NA	NA	NA	NA	#VALUE!	2.64326
agat-gene-463	paeni_NIB01_000469	512025	512930	+	murQ	protein_coding		carbon-oxygen lyase activity|0016835||IEA	amino sugar metabolic process|0006040||IEA, peptidoglycan turnover|0009254||IEA	GO:0006040, GO:0009254, GO:0016835	N-acetylmuramic acid 6-phosphate etherase		Specifically catalyzes the cleavage of the D-lactyl ether substituent of MurNAc 6-phosphate, producing GlcNAc 6- phosphate and D-lactate	murQ	-	4.2.1.126	ko:K07106	ko00520,ko01100,map00520,map01100	-	R08555	RC00397,RC00746	ko00000,ko00001,ko01000	-	-	-	SIS,SIS_2	operon0291	operon0092							4.68851	4.82551	4.78895	1.14307e-07	4.19681e-07	1.55272e-61	TRUE	NA	NA	NA	NA	NA	NA	#VALUE!	4.40543
agat-gene-465	paeni_NIB01_000471	514041	515270	-		protein_coding					anhydro-N-acetylmuramic acid kinase		Catalyzes the specific phosphorylation of 1,6-anhydro-N- acetylmuramic acid (anhMurNAc) with the simultaneous cleavage of the 1,6-anhydro ring, generating MurNAc-6-P. Is required for the utilization of anhMurNAc either imported from the medium or derived from its own cell wall murein, and thus plays a role in cell wall recycling	anmK	GO:0003674,GO:0003824,GO:0006793,GO:0006796,GO:0008150,GO:0008152,GO:0009987,GO:0016301,GO:0016310,GO:0016740,GO:0016772,GO:0044237	2.7.1.170,4.2.1.126	ko:K07106,ko:K09001	ko00520,ko01100,map00520,map01100	-	R08555	RC00397,RC00746	ko00000,ko00001,ko01000	-	-	iECABU_c1320.ECABU_c18930,iECED1_1282.ECED1_1841,ic_1306.c2032	AnmK	operon0292								-1.1467	-1.12456	-1.10452	0.00019827	0.000230479	1.2711e-09	TRUE	0.8843	0.758797	0.68414	3.43748e-05	0.00165115	0.000175612	FALSE	60.9235
agat-gene-464	paeni_NIB01_000470	513078	513917	-		protein_coding					MurR/RpiR family transcriptional regulator		transcriptional	-	-	-	-	-	-	-	-	-	-	-	-	HTH_6,SIS	operon0292								-0.0433877	-0.0516556	-0.062683	0.690715	0.666242	0.545225	FALSE	0.455117	0.453448	0.407849	0.000941509	0.00468765	0.00125149	FALSE	87.7447
agat-gene-466	paeni_NIB01_000472	515567	516400	+		protein_coding					hypothetical protein		Involved in the tonB-independent uptake of proteins	-	-	-	-	-	-	-	-	-	-	-	-	-	operon0293	operon0093							1.43748	1.75942	1.59627	0.00332207	0.00390272	0.000138893	TRUE	NA	NA	NA	NA	NA	NA	#VALUE!	11.1148
agat-gene-467	paeni_NIB01_000473	516413	517834	+		protein_coding					N-acetylmuramoyl-L-alanine amidase family protein		N-acetylmuramoyl-L-alanine amidase	-	-	3.5.1.28	ko:K01448	ko01503,map01503	M00727	R04112	RC00064,RC00141	ko00000,ko00001,ko00002,ko01000,ko01011,ko03036	-	-	-	AMIN,Amidase_3,Cu_amine_oxidN1	operon0293	operon0093							0.843189	1.09487	0.97867	0.0274093	0.018723	0.00611018	FALSE	0.337877	0.352108	0.242404	0.193473	0.241708	0.360615	FALSE	14.4312
agat-gene-468	paeni_NIB01_000474	517918	518430	+		protein_coding					GerMN domain-containing protein		Sporulation and spore germination	-	-	-	-	-	-	-	-	-	-	-	-	Germane	operon0294	operon0093							1.82595	1.98765	1.94745	1.9801e-05	1.6812e-05	1.08814e-18	TRUE	-0.96888	-0.982405	-0.947881	1.6882e-05	0.000958024	3.79847e-06	FALSE	8.26634
agat-gene-472	paeni_NIB01_000478	523096	524112	-		protein_coding					ABC transporter ATP-binding protein		Belongs to the ABC transporter superfamily	phnT	-	3.6.3.30	ko:K02010	ko02010,map02010	M00190	-	-	ko00000,ko00001,ko00002,ko01000,ko02000	3.A.1.10	-	-	ABC_tran,TOBE_2	operon0295	operon0094							4.17461	4.11554	4.07451	2.97349e-07	6.71901e-07	6.26613e-55	TRUE	-0.252454	-0.457899	NA	0.55078	0.356188	NA	#VALUE!	1.40645
agat-gene-471	paeni_NIB01_000477	521942	523018	-		protein_coding					ABC transporter substrate-binding protein		ABC transporter substrate-binding protein	ftpB	-	-	ko:K02012	ko02010,map02010	M00190	-	-	ko00000,ko00001,ko00002,ko02000	3.A.1.10	-	-	SBP_bac_11,SBP_bac_6	operon0295	operon0094							3.48444	3.38955	3.36585	1.51745e-07	2.05593e-07	1.70747e-86	TRUE	-0.207229	-0.321521	-0.239123	0.455009	0.400299	0.390204	FALSE	2.51739
agat-gene-470	paeni_NIB01_000476	520166	521851	-		protein_coding					iron ABC transporter permease		ABC transporter permease	ftpA	-	-	ko:K02011	ko02010,map02010	M00190	-	-	ko00000,ko00001,ko00002,ko02000	3.A.1.10	-	-	BPD_transp_1	operon0295	operon0094							2.6705	2.62652	2.57854	2.07927e-06	7.05028e-06	8.49955e-26	TRUE	-0.186211	-0.211506	-0.189846	0.451189	0.420387	0.425737	FALSE	4.11812
agat-gene-469	paeni_NIB01_000475	518601	520169	-		protein_coding					MBL fold metallo-hydrolase		Metal-dependent RNase, consists of a metallo-beta-lactamase domain and an RNA-binding KH domain	ysh1	-	-	ko:K07041,ko:K07576,ko:K07577,ko:K12574	ko03018,map03018	-	-	-	ko00000,ko00001,ko01000,ko03019	-	-	-	Beta-Casp,Lactamase_B,Lactamase_B_2,Lactamase_B_6,RMMBL	operon0295	operon0094							1.6878	1.61977	1.5793	1.64871e-05	4.63467e-05	1.64815e-17	TRUE	-0.546459	-0.748676	-0.660981	0.0374185	0.0175359	0.0126504	FALSE	6.08004
agat-gene-473	paeni_NIB01_000479	524474	525382	+		protein_coding					LysR family transcriptional regulator		Transcriptional regulator	rbcR1	-	-	ko:K21711	-	-	-	-	ko00000,ko03000	-	-	-	HTH_1,LysR_substrate	operon0296	operon0095							1.13179	1.10615	0.947094	0.0343757	0.0422246	0.0146641	FALSE	NA	NA	NA	NA	NA	NA	#VALUE!	1.47213
agat-gene-474	paeni_NIB01_000480	525527	526387	+		protein_coding					CYTH domain-containing protein		-	M1-276	-	-	-	-	-	-	-	-	-	-	-	CYTH	operon0297	operon0095							0.908404	0.823066	0.775306	0.00849214	0.0150139	0.000879681	FALSE	NA	NA	NA	NA	NA	NA	#VALUE!	3.60917
agat-gene-476	paeni_NIB01_000482	527338	527976	-		protein_coding					pentapeptide repeat-containing protein		BTB POZ domain-containing protein KCTD9	yisX	-	-	-	-	-	-	-	-	-	-	-	Pentapeptide,Pentapeptide_4	operon0298	operon0096							-0.33332	-0.373364	-0.388105	0.0448814	0.0201056	0.00496141	FALSE	0.197735	0.379967	0.234092	0.505244	0.33754	0.406488	FALSE	32.4907
agat-gene-475	paeni_NIB01_000481	526646	527251	-		protein_coding		oxidoreductase activity|0016491||IEA		GO:0016491	short chain dehydrogenase		Enoyl-(Acyl carrier protein) reductase	-	-	-	-	-	-	-	-	-	-	-	-	adh_short_C2	operon0298	operon0096							2.39043	2.3395	2.3234	2.53418e-08	1.15609e-07	6.28179e-107	TRUE	0.856246	1.07551	0.974806	4.57985e-05	0.00139731	2.02413e-05	FALSE	53.3002
gene-paeni_NIB01_000483	paeni_NIB01_000483	528064	528134	-		tRNA																					operon0299	operon0096							#N/A	#N/A	#N/A	#N/A	#N/A	#N/A	#N/A	NA	NA	NA	NA	NA	NA	#VALUE!	NA
gene-paeni_NIB01_000484	paeni_NIB01_000484	528144	528217	-		tRNA																					operon0299	operon0097							#N/A	#N/A	#N/A	#N/A	#N/A	#N/A	#N/A	NA	NA	NA	NA	NA	NA	#VALUE!	NA
gene-paeni_NIB01_000485	paeni_NIB01_000485	528234	528310	-		tRNA																					operon0299	operon0097							#N/A	#N/A	#N/A	#N/A	#N/A	#N/A	#N/A	NA	NA	NA	NA	NA	NA	#VALUE!	NA
gene-paeni_NIB01_000486	paeni_NIB01_000486	528317	528391	-		tRNA																					operon0299	operon0097							#N/A	#N/A	#N/A	#N/A	#N/A	#N/A	#N/A	NA	NA	NA	NA	NA	NA	#VALUE!	NA
gene-paeni_NIB01_000487	paeni_NIB01_000487	528400	528486	-		tRNA																					operon0299	operon0097							#N/A	#N/A	#N/A	#N/A	#N/A	#N/A	#N/A	NA	NA	NA	NA	NA	NA	#VALUE!	NA
gene-paeni_NIB01_000488	paeni_NIB01_000488	528496	528571	-		tRNA																					operon0299	operon0097							#N/A	#N/A	#N/A	#N/A	#N/A	#N/A	#N/A	NA	NA	NA	NA	NA	NA	#VALUE!	NA
gene-paeni_NIB01_000489	paeni_NIB01_000489	528588	528662	-		tRNA																					operon0299	operon0097							#N/A	#N/A	#N/A	#N/A	#N/A	#N/A	#N/A	NA	NA	NA	NA	NA	NA	#VALUE!	NA
gene-paeni_NIB01_000490	paeni_NIB01_000490	528674	528749	-		tRNA																					operon0299	operon0097							#N/A	#N/A	#N/A	#N/A	#N/A	#N/A	#N/A	NA	NA	NA	NA	NA	NA	#VALUE!	NA
gene-paeni_NIB01_000491	paeni_NIB01_000491	528847	528922	-		tRNA																					operon0299	operon0097							#N/A	#N/A	#N/A	#N/A	#N/A	#N/A	#N/A	NA	NA	NA	NA	NA	NA	#VALUE!	NA
gene-paeni_NIB01_000492	paeni_NIB01_000492	528951	529028	-		tRNA																					operon0299	operon0097							#N/A	#N/A	#N/A	#N/A	#N/A	#N/A	#N/A	NA	NA	NA	NA	NA	NA	#VALUE!	NA
gene-paeni_NIB01_000493	paeni_NIB01_000493	529056	529129	-		tRNA																					operon0299	operon0097							#N/A	#N/A	#N/A	#N/A	#N/A	#N/A	#N/A	NA	NA	NA	NA	NA	NA	#VALUE!	NA
gene-paeni_NIB01_000494	paeni_NIB01_000494	529150	529225	-		tRNA																					operon0299	operon0098							#N/A	#N/A	#N/A	#N/A	#N/A	#N/A	#N/A	NA	NA	NA	NA	NA	NA	#VALUE!	NA
gene-paeni_NIB01_000495	paeni_NIB01_000495	529233	529304	-		tRNA																					operon0299	operon0098							#N/A	#N/A	#N/A	#N/A	#N/A	#N/A	#N/A	NA	NA	NA	NA	NA	NA	#VALUE!	NA
gene-paeni_NIB01_000496	paeni_NIB01_000496	529324	529415	-		tRNA																					operon0299	operon0098							#N/A	#N/A	#N/A	#N/A	#N/A	#N/A	#N/A	NA	NA	NA	NA	NA	NA	#VALUE!	NA
gene-paeni_NIB01_000497	paeni_NIB01_000497	529420	529495	-		tRNA																					operon0299	operon0098							#N/A	#N/A	#N/A	#N/A	#N/A	#N/A	#N/A	NA	NA	NA	NA	NA	NA	#VALUE!	NA
gene-paeni_NIB01_000498	paeni_NIB01_000498	529497	529572	-		tRNA																					operon0299	operon0098							#N/A	#N/A	#N/A	#N/A	#N/A	#N/A	#N/A	NA	NA	NA	NA	NA	NA	#VALUE!	NA
gene-paeni_NIB01_000499	paeni_NIB01_000499	529597	529673	-		tRNA																					operon0299	operon0099							#N/A	#N/A	#N/A	#N/A	#N/A	#N/A	#N/A	NA	NA	NA	NA	NA	NA	#VALUE!	NA
gene-paeni_NIB01_000500	paeni_NIB01_000500	529731	529847	-	rrf	rRNA																					operon0299	operon0099							#N/A	#N/A	#N/A	#N/A	#N/A	#N/A	#N/A	NA	NA	NA	NA	NA	NA	#VALUE!	NA
gene-paeni_NIB01_000501	paeni_NIB01_000501	529991	533039	-		rRNA																					operon0299	operon0099							#N/A	#N/A	#N/A	#N/A	#N/A	#N/A	#N/A	NA	NA	NA	NA	NA	NA	#VALUE!	NA
gene-paeni_NIB01_000502	paeni_NIB01_000502	533425	534976	-		rRNA																					operon0299								#N/A	#N/A	#N/A	#N/A	#N/A	#N/A	#N/A	NA	NA	NA	NA	NA	NA	#VALUE!	NA
agat-gene-477	paeni_NIB01_000503	535671	536639	-	rocF	protein_coding		arginase activity|0004053||IEA	arginine catabolic process to ornithine|0019547||IEA	GO:0019547, GO:0004053	arginase		Belongs to the arginase family	rocF	GO:0003674,GO:0003824,GO:0004053,GO:0006082,GO:0006520,GO:0006525,GO:0006807,GO:0008150,GO:0008152,GO:0009064,GO:0009987,GO:0016787,GO:0016810,GO:0016813,GO:0019752,GO:0043436,GO:0044237,GO:0044238,GO:0044281,GO:0071704,GO:1901564,GO:1901605	3.5.3.1,3.5.3.11	ko:K01476,ko:K01480	ko00220,ko00330,ko01100,ko01110,ko01130,ko01230,ko05146,map00220,map00330,map01100,map01110,map01130,map01230,map05146	M00029,M00133,M00134	R00551,R01157	RC00024,RC00329	ko00000,ko00001,ko00002,ko01000	-	-	-	Arginase	operon0300	operon0100							2.53568	2.5097	2.46759	1.91544e-06	4.88762e-06	2.52505e-24	TRUE	NA	NA	NA	NA	NA	NA	#VALUE!	10.7509
agat-gene-478	paeni_NIB01_000504	536693	537886	-		protein_coding		ornithine-oxo-acid transaminase activity|0004587||IEA, pyridoxal phosphate binding|0030170||IEA		GO:0004587, GO:0030170	ornithine--oxo-acid transaminase		Catalyzes the interconversion of ornithine to glutamate semialdehyde	rocD	GO:0003674,GO:0003824,GO:0004587,GO:0005488,GO:0005515,GO:0006082,GO:0006520,GO:0006525,GO:0006527,GO:0006807,GO:0008144,GO:0008150,GO:0008152,GO:0008483,GO:0009056,GO:0009063,GO:0009064,GO:0009065,GO:0009987,GO:0016054,GO:0016740,GO:0016769,GO:0019752,GO:0019842,GO:0030170,GO:0036094,GO:0042802,GO:0043167,GO:0043168,GO:0043436,GO:0044237,GO:0044238,GO:0044248,GO:0044281,GO:0044282,GO:0046395,GO:…	2.6.1.11,2.6.1.13,2.6.1.17	ko:K00819,ko:K00821	ko00220,ko00300,ko00330,ko01100,ko01110,ko01120,ko01130,ko01210,ko01230,map00220,map00300,map00330,map01100,map01110,map01120,map01130,map01210,map01230	M00016,M00028,M00845	R00667,R02283,R04475	RC00006,RC00062	ko00000,ko00001,ko00002,ko01000,ko01007	-	-	iYO844.BSU40340	Aminotran_3	operon0300	operon0100							2.43039	2.39736	2.35763	2.27497e-06	4.71791e-06	1.32959e-23	TRUE	-0.0950438	-0.246199	NA	0.838275	0.605142	NA	#VALUE!	15.7255
agat-gene-480	paeni_NIB01_000506	538705	539526	-		protein_coding					ABC transporter substrate-binding protein		Belongs to the bacterial solute-binding protein 3 family	artP	-	-	ko:K02030	-	M00236	-	-	ko00000,ko00002,ko02000	3.A.1.3	-	-	SBP_bac_3	operon0301	operon0101							2.45302	2.46882	2.42544	2.42553e-06	4.97472e-06	8.53189e-25	TRUE	NA	NA	NA	NA	NA	NA	#VALUE!	7.02406
agat-gene-479	paeni_NIB01_000505	538025	538681	-		protein_coding					amino acid ABC transporter permease		ABC transporter permease	glnPH2	-	-	ko:K02029,ko:K02030	-	M00236	-	-	ko00000,ko00002,ko02000	3.A.1.3	-	iSB619.SA_RS09465	BPD_transp_1,SBP_bac_3	operon0301	operon0101							2.16588	2.05333	1.99137	4.16194e-05	6.61761e-05	7.10656e-14	TRUE	NA	NA	NA	NA	NA	NA	#VALUE!	3.69947
agat-gene-481	paeni_NIB01_000507	539855	540499	+		protein_coding					GntR family transcriptional regulator		FCD	-	-	-	-	-	-	-	-	-	-	-	-	FCD,GntR	operon0302								-0.149899	-0.238089	-0.239109	0.397	0.146612	0.126196	FALSE	0.86003	0.854834	0.802102	1.0925e-05	0.000190894	1.91221e-08	FALSE	51.7761
agat-gene-482	paeni_NIB01_000508	540678	541418	-		protein_coding					class I SAM-dependent methyltransferase		Tellurite resistance protein TehB	yodH	GO:0003674,GO:0003824,GO:0005575,GO:0005622,GO:0005623,GO:0005737,GO:0008150,GO:0008152,GO:0008168,GO:0008757,GO:0016740,GO:0016741,GO:0032259,GO:0044424,GO:0044464	-	-	-	-	-	-	-	-	-	-	Methyltransf_11,Methyltransf_25,Methyltransf_31	operon0303								0.555105	0.473089	0.43598	0.140977	0.138159	0.130958	FALSE	NA	NA	NA	NA	NA	NA	#VALUE!	2.7144
agat-gene-483	paeni_NIB01_000509	541583	541942	+		protein_coding					hypothetical protein		-	-	-	-	-	-	-	-	-	-	-	-	-	-	operon0304								1.12997	1.2106	1.12699	0.0238204	0.011038	0.000351912	TRUE	NA	NA	NA	NA	NA	NA	#VALUE!	1.71839
agat-gene-484	paeni_NIB01_000510	542938	544113	-		protein_coding					hypothetical protein		-	-	-	-	-	-	-	-	-	-	-	-	-	-	operon0305	operon0102							0.683431	0.671146	0.636964	0.0164308	0.02204	0.00442536	FALSE	0.45405	0.837613	0.657273	0.15355	0.0308597	0.0248079	FALSE	15.3588
agat-gene-485	paeni_NIB01_000511	544176	544910	-		protein_coding					C39 family peptidase		Peptidase_C39 like family	-	-	-	-	-	-	-	-	-	-	-	-	Peptidase_C39_2	operon0306	operon0102							1.27734	1.12095	1.07212	0.00162813	0.000803641	5.00556e-06	TRUE	1.13624	1.14226	1.08468	1.60542e-06	4.36167e-05	1.59102e-11	TRUE	15.0551
agat-gene-486	paeni_NIB01_000512	545428	545655	-		protein_coding					cold-shock protein		Cold-inducible protein YdjO	-	-	-	-	-	-	-	-	-	-	-	-	YdjO	operon0307								0.226354	0.225609	0.221807	0.105958	0.208302	0.240457	FALSE	-0.325105	-0.328655	-0.318398	0.0400172	0.0936645	0.0695027	FALSE	760.728
agat-gene-487	paeni_NIB01_000513	545845	546045	-		protein_coding					cold-shock protein		Cold-shock protein	cspA	-	-	ko:K03704	-	-	-	-	ko00000,ko03000	-	-	-	CSD	operon0308								-2.6963	-2.53103	-2.4793	6.06053e-06	5.09898e-05	1.42893e-14	TRUE	0.0162283	-0.0652931	-0.0764798	0.929012	0.773877	0.718726	FALSE	9399.79
agat-gene-488	paeni_NIB01_000514	546433	546669	-		protein_coding					hypothetical protein		Integron gene cassette protein	-	-	-	-	-	-	-	-	-	-	-	-	-	operon0309								0.21818	0.153533	0.13556	0.486638	0.548937	0.599764	FALSE	-0.638525	-0.471235	-0.369404	0.0487731	0.176808	0.186296	FALSE	23.1928
agat-gene-489	paeni_NIB01_000515	546812	547117	-		protein_coding	membrane|0016020||IEA	glutamic-type endopeptidase activity|0070007||IEA		GO:0070007, GO:0016020	CPBP family glutamic-type intramembrane protease		CAAX protease self-immunity	-	-	-	ko:K07052	-	-	-	-	ko00000	-	-	-	Abi	operon0310	operon0103							-1.30814	-1.54078	NA	0.00486554	0.00830247	NA	#VALUE!	NA	NA	NA	NA	NA	NA	#VALUE!	1.45844
agat-gene-490	paeni_NIB01_000516	547290	547637	-		protein_coding					hypothetical protein		CAAX protease self-immunity	-	-	-	ko:K07052	-	-	-	-	ko00000	-	-	-	Abi	operon0311	operon0103							0.0229298	0.295087	NA	0.971163	0.661083	NA	#VALUE!	NA	NA	NA	NA	NA	NA	#VALUE!	0.722381
agat-gene-491	paeni_NIB01_000517	547891	548562	+		protein_coding					phosphatase PAP2 family protein		COG0671 Membrane-associated phospholipid phosphatase	-	-	-	-	-	-	-	-	-	-	-	-	PAP2,PAP2_3	operon0312								0.894685	0.861074	0.836261	9.23645e-05	0.000166537	7.39102e-13	FALSE	0.529103	0.594375	0.536876	0.00116585	0.00242207	0.000430249	FALSE	25.0261
agat-gene-492	paeni_NIB01_000518	548707	549486	-		protein_coding					AraC family transcriptional regulator		helix_turn_helix, arabinose operon control protein	yisR3	-	-	-	-	-	-	-	-	-	-	-	AraC_binding,HTH_18,HTH_AraC	operon0313								0.531826	0.419446	0.395538	0.0202092	0.0382544	0.0248391	FALSE	1.17869	1.43204	1.32604	0.000183645	0.000265911	6.40116e-07	TRUE	12.7949
agat-gene-493	paeni_NIB01_000519	549599	551014	+	pyk	protein_coding	cytoplasm|0005737||IEA	pyruvate kinase activity|0004743||IEA	glycolytic process|0006096||IEA	GO:0006096, GO:0004743, GO:0005737	pyruvate kinase		Belongs to the pyruvate kinase family	pyk	GO:0003674,GO:0003824,GO:0004743,GO:0005575,GO:0005622,GO:0005623,GO:0005737,GO:0005829,GO:0005975,GO:0006082,GO:0006090,GO:0006091,GO:0006096,GO:0006139,GO:0006163,GO:0006164,GO:0006165,GO:0006725,GO:0006732,GO:0006733,GO:0006753,GO:0006754,GO:0006757,GO:0006793,GO:0006796,GO:0006807,GO:0008150,GO:0008152,GO:0009056,GO:0009058,GO:0009108,GO:0009117,GO:0009123,GO:0009124,GO:0009126,GO:0009127,GO:…	2.7.1.40,2.7.7.4	ko:K00873,ko:K00958	ko00010,ko00230,ko00261,ko00450,ko00620,ko00920,ko01100,ko01110,ko01120,ko01130,ko01200,ko01230,ko04922,ko04930,ko05165,ko05203,ko05230,map00010,map00230,map00261,map00450,map00620,map00920,map01100,map01110,map01120,map01130,map01200,map01230,map04922,map04930,map05165,map05203,map05230	M00001,M00002,M00049,M00050,M00176,M00596	R00200,R00430,R00529,R01138,R01858,R02320,R04929	RC00002,RC00015,RC02809,RC02889	ko00000,ko00001,ko00002,ko01000,ko04131,ko04147	-	-	-	PEP-utilizers,PK,PK_C	operon0314								-3.95551	-4.02781	-4.01488	9.94346e-06	1.64681e-07	4.13927e-70	TRUE	-1.40934	-1.30239	-1.2778	3.92469e-07	0.000159457	3.81659e-10	TRUE	347.474
agat-gene-494	paeni_NIB01_000520	551151	552680	-		protein_coding		protein binding|0005515||IEA		GO:0005515	PAS domain-containing protein		PAS PAC domain	tar3	-	-	ko:K03406	ko02020,ko02030,map02020,map02030	-	-	-	ko00000,ko00001,ko02035	-	-	-	MCPsignal,PAS_3,PAS_4,PAS_9	operon0315								-2.47696	-2.53073	-2.44483	0.000530759	0.000158935	3.02454e-11	TRUE	-0.234302	-0.135421	-0.129848	0.301634	0.667329	0.61246	FALSE	46.2953
agat-gene-495	paeni_NIB01_000521	552847	553296	-		protein_coding					SRPBCC family protein		polyketide cyclase	-	-	-	-	-	-	-	-	-	-	-	-	AHSA1	operon0316								3.92687	3.95786	3.9269	9.80308e-08	2.10136e-07	2.6178e-72	TRUE	0.124083	-0.0281955	-0.0369748	0.560972	0.930199	0.890279	FALSE	2.27933
agat-gene-498	paeni_NIB01_000524	554883	555521	+		protein_coding					AraC family transcriptional regulator		Transcriptional regulator	-	-	-	-	-	-	-	-	-	-	-	-	HTH_18	operon0317	operon0104							-0.781713	-0.710223	-0.709059	0.00987035	0.0182219	0.00206425	FALSE	-0.196691	-0.0687882	-0.074074	0.440865	0.821889	0.782342	FALSE	19.321
agat-gene-497	paeni_NIB01_000523	554341	554886	+		protein_coding					DNA topology modulation protein FlaR		COG0563 Adenylate kinase and related kinases	adk	-	2.7.4.3	ko:K00939	ko00230,ko00730,ko01100,ko01110,ko01130,map00230,map00730,map01100,map01110,map01130	M00049	R00127,R01547,R11319	RC00002	ko00000,ko00001,ko00002,ko01000,ko04147	-	-	-	AAA_18,ADK,SKI	operon0317	operon0104							-1.23642	-1.1938	-1.17243	0.000307962	0.000175895	4.43494e-10	TRUE	-0.14944	0.121271	0.0454108	0.647197	0.782338	0.886716	FALSE	20.1282
agat-gene-496	paeni_NIB01_000522	553580	554317	+		protein_coding					WecB/TagA/CpsF family glycosyltransferase		Catalyzes the conversion of GlcNAc-PP-undecaprenol into ManNAc-GlcNAc-PP-undecaprenol, the first committed lipid intermediate in the de novo synthesis of teichoic acid	rffM	GO:0000271,GO:0003674,GO:0003824,GO:0005975,GO:0005976,GO:0008150,GO:0008152,GO:0009058,GO:0009059,GO:0009246,GO:0009987,GO:0016051,GO:0016740,GO:0016757,GO:0016758,GO:0033692,GO:0034637,GO:0034645,GO:0043170,GO:0044237,GO:0044238,GO:0044249,GO:0044260,GO:0044262,GO:0044264,GO:0046378,GO:0071704,GO:1901135,GO:1901137,GO:1901576	2.4.1.180,2.4.1.187	ko:K02852,ko:K05946	ko05111,map05111	-	-	-	ko00000,ko00001,ko01000,ko01003	-	GT26	iLF82_1304.LF82_1862	Glyco_tran_WecB	operon0317	operon0104							-1.22123	-1.21657	-1.20602	0.000103402	8.04804e-05	2.3527e-15	TRUE	-0.0327042	0.0760828	0.0400606	0.876556	0.748065	0.870972	FALSE	48.1615
agat-gene-499	paeni_NIB01_000525	555537	556070	-		protein_coding		pyridoxal phosphate binding|0030170||IEA		GO:0030170	MOSC domain-containing protein		-	yuaD	-	-	-	-	-	-	-	-	-	-	-	MOSC	operon0318								-0.397743	-0.370044	-0.370262	0.0895964	0.0647029	0.0431557	FALSE	-0.0858448	0.015721	-0.0057889	0.702604	0.953698	0.981524	FALSE	17.11
agat-gene-500	paeni_NIB01_000526	556380	556685	+		protein_coding					DUF1304 domain-containing protein		Protein of unknown function (DUF1304)	ypaA	-	-	ko:K08987	-	-	-	-	ko00000	-	-	-	DUF1304	operon0319	operon0105							-0.315631	-0.323703	-0.34715	0.150085	0.113362	0.0595125	FALSE	0.325731	0.487467	0.414153	0.0686585	0.0272716	0.0287765	FALSE	21.1132
agat-gene-501	paeni_NIB01_000527	556804	557604	+		protein_coding					DUF4261 domain-containing protein		Domain of unknown function (DUF4261)	-	-	-	-	-	-	-	-	-	-	-	-	DUF4261	operon0320	operon0105							-0.237765	-0.243054	-0.25862	0.0479599	0.0599337	0.0120617	FALSE	-0.0938568	-0.0241458	-0.0469551	0.42824	0.880223	0.765739	FALSE	99.7789
agat-gene-502	paeni_NIB01_000528	557833	558192	+		protein_coding					hypothetical protein		-	-	-	-	-	-	-	-	-	-	-	-	-	SpoIIAA-like	operon0321								-1.9061	-1.93759	-1.91942	3.13866e-05	1.63576e-05	2.88889e-17	TRUE	0.0957545	0.189471	0.115203	0.72639	0.566035	0.661138	FALSE	97.4175
agat-gene-503	paeni_NIB01_000529	558347	558841	-		protein_coding					GNAT family N-acetyltransferase		Acetyltransferase (GNAT) domain	-	-	-	-	-	-	-	-	-	-	-	-	Acetyltransf_1,Acetyltransf_10	operon0322	operon0106				c1	Inositol	inositol iol	1.49994	1.58406	1.51838	0.00141678	0.000397678	1.92249e-08	TRUE	-0.12896	-0.24332	-0.197438	0.615808	0.436483	0.438854	FALSE	6.00616
agat-gene-504	paeni_NIB01_000530	558838	559347	-		protein_coding					hypothetical protein		-	-	-	-	-	-	-	-	-	-	-	-	-	-	operon0322	operon0106				c1	Inositol	inositol iol	1.0246	1.18554	1.11365	0.0189359	0.00360032	8.44375e-05	TRUE	-0.526146	-0.610477	-0.52668	0.0155317	0.0503296	0.0330078	FALSE	5.02657
agat-gene-505	paeni_NIB01_000531	559620	561599	+		protein_coding					methyl-accepting chemotaxis protein		Cache domain	mcpB3	-	-	ko:K03406	ko02020,ko02030,map02020,map02030	-	-	-	ko00000,ko00001,ko02035	-	-	-	4HB_MCP_1,HAMP,MCPsignal,dCache_1	operon0323					c1	Inositol	inositol iol	0.424684	0.644548	0.608572	0.183023	0.0452272	0.0352489	FALSE	0.0382079	0.0073558	-0.0184822	0.807686	0.970036	0.928547	FALSE	35.4158
agat-gene-512	paeni_NIB01_000538	568625	570490	-	iolD	protein_coding		magnesium ion binding|0000287||IEA, hydrolase activity, acting on acid carbon-carbon bonds, in ketonic substances|0016823||IEA, thiamine pyrophosphate binding|0030976||IEA	inositol catabolic process|0019310||IEA	GO:0019310, GO:0000287, GO:0016823, GO:0030976	3D-(3,5/4)-trihydroxycyclohexane-1,2-dione acylhydrolase (decyclizing)		Belongs to the TPP enzyme family	iolD	GO:0006629,GO:0006644,GO:0006793,GO:0006796,GO:0008150,GO:0008152,GO:0009056,GO:0009395,GO:0009987,GO:0016042,GO:0019637,GO:0044237,GO:0044238,GO:0044242,GO:0044248,GO:0044255,GO:0046434,GO:0071704,GO:1901575	3.7.1.22	ko:K03336	ko00562,ko01100,ko01120,map00562,map01100,map01120	-	R08603	RC02331	ko00000,ko00001,ko01000	-	-	iYO844.BSU39730	TPP_enzyme_C,TPP_enzyme_M,TPP_enzyme_N	operon0324					c1	Inositol	inositol iol	3.37958	3.53445	3.48924	2.69785e-06	3.91486e-06	1.0536e-27	TRUE	0.347422	0.353955	0.251847	0.188312	0.249828	0.339678	FALSE	11.6429
agat-gene-510	paeni_NIB01_000536	566421	567431	-	iolC	protein_coding		5-dehydro-2-deoxygluconokinase activity|0047590||IEA	inositol catabolic process|0019310||IEA	GO:0019310, GO:0047590	5-dehydro-2-deoxygluconokinase		Catalyzes the phosphorylation of 5-dehydro-2-deoxy-D- gluconate (2-deoxy-5-keto-D-gluconate or DKG) to 6-phospho-5- dehydro-2-deoxy-D-gluconate (DKGP)	iolC	GO:0003674,GO:0003824,GO:0005575,GO:0005622,GO:0005623,GO:0005737,GO:0005975,GO:0006629,GO:0006644,GO:0006793,GO:0006796,GO:0008150,GO:0008152,GO:0009056,GO:0009395,GO:0009987,GO:0016042,GO:0016301,GO:0016310,GO:0016740,GO:0016772,GO:0019200,GO:0019637,GO:0044237,GO:0044238,GO:0044242,GO:0044248,GO:0044255,GO:0044262,GO:0044424,GO:0044464,GO:0046434,GO:0046835,GO:0071704,GO:1901575	2.7.1.92	ko:K03338	ko00562,ko01100,ko01120,map00562,map01100,map01120	-	R05661	RC00002,RC00017	ko00000,ko00001,ko01000	-	-	iYO844.BSU39740	PfkB	operon0324	operon0107				c1	Inositol	inositol iol	4.52841	4.80498	4.73778	2.80532e-06	8.2474e-06	5.99385e-28	TRUE	NA	NA	NA	NA	NA	NA	#VALUE!	3.52161
agat-gene-507	paeni_NIB01_000533	562856	563665	-	iolB	protein_coding		intramolecular oxidoreductase activity, interconverting aldoses and ketoses|0016861||IEA	inositol catabolic process|0019310||IEA	GO:0019310, GO:0016861	5-deoxy-glucuronate isomerase		KduI/IolB family	iolB	-	5.3.1.30	ko:K03337	ko00562,ko01100,ko01120,map00562,map01100,map01120	-	R08503	RC00541	ko00000,ko00001,ko01000	-	-	-	KduI	operon0324	operon0107				c1	Inositol	inositol iol	2.76568	3.02554	2.9533	2.37756e-05	4.15854e-05	2.49325e-15	TRUE	-0.433794	-0.298953	-0.240398	0.140743	0.329411	0.375085	FALSE	7.94072
agat-gene-509	paeni_NIB01_000535	564871	566307	-		protein_coding					CoA-acylating methylmalonate-semialdehyde dehydrogenase		Catalyzes the oxidation of malonate semialdehyde (MSA) and methylmalonate semialdehyde (MMSA) into acetyl-CoA and propanoyl-CoA, respectively	iolA	GO:0003674,GO:0003824,GO:0004491,GO:0006082,GO:0006520,GO:0006573,GO:0006574,GO:0006807,GO:0008150,GO:0008152,GO:0009056,GO:0009063,GO:0009081,GO:0009083,GO:0009987,GO:0016054,GO:0016491,GO:0016620,GO:0016903,GO:0019752,GO:0043436,GO:0044237,GO:0044238,GO:0044248,GO:0044281,GO:0044282,GO:0046395,GO:0055114,GO:0071704,GO:1901564,GO:1901565,GO:1901575,GO:1901605,GO:1901606	1.2.1.18,1.2.1.27	ko:K00140	ko00280,ko00410,ko00562,ko00640,ko01100,ko01200,map00280,map00410,map00562,map00640,map01100,map01200	M00013	R00705,R00706,R00922,R00935	RC00004,RC02723,RC02817	ko00000,ko00001,ko00002,ko01000	-	-	-	Aldedh	operon0324	operon0107				c1	Inositol	inositol iol	3.90081	4.22333	4.1593	5.25266e-06	9.07483e-06	2.25941e-25	TRUE	-0.176431	-0.3149	-0.248891	0.566072	0.350542	0.359193	FALSE	5.20443
agat-gene-508	paeni_NIB01_000534	563748	564800	-	iolG	protein_coding		inositol 2-dehydrogenase activity|0050112||IEA	inositol catabolic process|0019310||IEA	GO:0019310, GO:0050112	inositol 2-dehydrogenase		Oxidoreductase family, C-terminal alpha/beta domain	iolG	-	1.1.1.18,1.1.1.369	ko:K00010	ko00521,ko00562,ko01100,ko01120,ko01130,map00521,map00562,map01100,map01120,map01130	-	R01183,R09951	RC00182	ko00000,ko00001,ko01000	-	-	-	GFO_IDH_MocA,GFO_IDH_MocA_C	operon0324	operon0107				c1	Inositol	inositol iol	3.74606	3.98699	3.91819	4.48962e-06	1.26128e-05	6.76134e-23	TRUE	-0.133494	-0.284553	-0.218512	0.691088	0.439565	0.441027	FALSE	4.64622
agat-gene-506	paeni_NIB01_000532	561738	562751	-		protein_coding					LacI family transcriptional regulator		Transcriptional regulator	purR	GO:0000976,GO:0000984,GO:0000986,GO:0000987,GO:0001017,GO:0001067,GO:0001130,GO:0001131,GO:0001141,GO:0001216,GO:0001217,GO:0002054,GO:0002057,GO:0002060,GO:0003674,GO:0003676,GO:0003677,GO:0003690,GO:0003700,GO:0005488,GO:0005575,GO:0005622,GO:0005623,GO:0005737,GO:0005829,GO:0006140,GO:0006355,GO:0008150,GO:0009889,GO:0009890,GO:0009891,GO:0009892,GO:0009893,GO:0010468,GO:0010556,GO:0010557,GO:…	-	ko:K02529,ko:K03604	-	-	-	-	ko00000,ko03000	-	-	-	LacI,Peripla_BP_3	operon0324					c1	Inositol	inositol iol	1.23545	1.24825	1.21827	1.70881e-05	6.04751e-05	7.52713e-12	TRUE	0.495988	0.402967	0.354855	0.0011141	0.0146661	0.0117878	FALSE	64.4971
agat-gene-511	paeni_NIB01_000537	567543	568445	-	iolE	protein_coding		myo-inosose-2 dehydratase activity|0050114||IEA	inositol catabolic process|0019310||IEA	GO:0019310, GO:0050114	myo-inosose-2 dehydratase		Catalyzes the dehydration of inosose (2-keto-myo- inositol, 2KMI or 2,4,6 3,5-pentahydroxycyclohexanone) to 3D- (3,5 4)-trihydroxycyclohexane-1,2-dione (D-2,3-diketo-4-deoxy-epi- inositol)	iolE	-	4.2.1.44	ko:K03335	ko00562,ko01100,ko01120,map00562,map01100,map01120	-	R02782,R05659	RC00782,RC01448	ko00000,ko00001,ko01000	-	-	iECED1_1282.ECED1_0303	AP_endonuc_2	operon0324	operon0107				c1	Inositol	inositol iol	5.11108	5.33562	5.28519	1.25802e-06	2.56362e-06	5.64948e-39	TRUE	NA	NA	NA	NA	NA	NA	#VALUE!	1.98928
gene-paeni_NIB01_000539	paeni_NIB01_000539	570810	570880	-		tRNA																					operon0325								#N/A	#N/A	#N/A	#N/A	#N/A	#N/A	#N/A	NA	NA	NA	NA	NA	NA	#VALUE!	NA
gene-paeni_NIB01_000540	paeni_NIB01_000540	570890	570963	-		tRNA																					operon0325	operon0108							#N/A	#N/A	#N/A	#N/A	#N/A	#N/A	#N/A	NA	NA	NA	NA	NA	NA	#VALUE!	NA
gene-paeni_NIB01_000541	paeni_NIB01_000541	570971	571049	-		tRNA																					operon0325	operon0108							#N/A	#N/A	#N/A	#N/A	#N/A	#N/A	#N/A	NA	NA	NA	NA	NA	NA	#VALUE!	NA
gene-paeni_NIB01_000542	paeni_NIB01_000542	571065	571141	-		tRNA																					operon0325	operon0108							#N/A	#N/A	#N/A	#N/A	#N/A	#N/A	#N/A	NA	NA	NA	NA	NA	NA	#VALUE!	NA
gene-paeni_NIB01_000543	paeni_NIB01_000543	571149	571223	-		tRNA																					operon0325	operon0108							#N/A	#N/A	#N/A	#N/A	#N/A	#N/A	#N/A	NA	NA	NA	NA	NA	NA	#VALUE!	NA
gene-paeni_NIB01_000544	paeni_NIB01_000544	571234	571314	-		tRNA																					operon0325	operon0108							#N/A	#N/A	#N/A	#N/A	#N/A	#N/A	#N/A	NA	NA	NA	NA	NA	NA	#VALUE!	NA
gene-paeni_NIB01_000545	paeni_NIB01_000545	571321	571396	-		tRNA																					operon0325	operon0109							#N/A	#N/A	#N/A	#N/A	#N/A	#N/A	#N/A	NA	NA	NA	NA	NA	NA	#VALUE!	NA
gene-paeni_NIB01_000546	paeni_NIB01_000546	571404	571489	-		tRNA																					operon0325	operon0109							#N/A	#N/A	#N/A	#N/A	#N/A	#N/A	#N/A	NA	NA	NA	NA	NA	NA	#VALUE!	NA
gene-paeni_NIB01_000547	paeni_NIB01_000547	571499	571574	-		tRNA																					operon0325	operon0110							#N/A	#N/A	#N/A	#N/A	#N/A	#N/A	#N/A	NA	NA	NA	NA	NA	NA	#VALUE!	NA
gene-paeni_NIB01_000548	paeni_NIB01_000548	571593	571668	-		tRNA																					operon0325	operon0110							#N/A	#N/A	#N/A	#N/A	#N/A	#N/A	#N/A	NA	NA	NA	NA	NA	NA	#VALUE!	NA
gene-paeni_NIB01_000549	paeni_NIB01_000549	571881	571958	-		tRNA																					operon0325	operon0111							#N/A	#N/A	#N/A	#N/A	#N/A	#N/A	#N/A	NA	NA	NA	NA	NA	NA	#VALUE!	NA
gene-paeni_NIB01_000550	paeni_NIB01_000550	571986	572059	-		tRNA																					operon0325	operon0111							#N/A	#N/A	#N/A	#N/A	#N/A	#N/A	#N/A	NA	NA	NA	NA	NA	NA	#VALUE!	NA
gene-paeni_NIB01_000551	paeni_NIB01_000551	572079	572154	-		tRNA																					operon0325	operon0112							#N/A	#N/A	#N/A	#N/A	#N/A	#N/A	#N/A	NA	NA	NA	NA	NA	NA	#VALUE!	NA
gene-paeni_NIB01_000552	paeni_NIB01_000552	572278	572349	-		tRNA																					operon0325	operon0112							#N/A	#N/A	#N/A	#N/A	#N/A	#N/A	#N/A	NA	NA	NA	NA	NA	NA	#VALUE!	NA
gene-paeni_NIB01_000553	paeni_NIB01_000553	572354	572429	-		tRNA																					operon0325	operon0112							#N/A	#N/A	#N/A	#N/A	#N/A	#N/A	#N/A	NA	NA	NA	NA	NA	NA	#VALUE!	NA
gene-paeni_NIB01_000554	paeni_NIB01_000554	572534	572607	-		tRNA																					operon0325	operon0112							#N/A	#N/A	#N/A	#N/A	#N/A	#N/A	#N/A	NA	NA	NA	NA	NA	NA	#VALUE!	NA
gene-paeni_NIB01_000555	paeni_NIB01_000555	572646	572762	-	rrf	rRNA																					operon0325	operon0112							#N/A	#N/A	#N/A	#N/A	#N/A	#N/A	#N/A	NA	NA	NA	NA	NA	NA	#VALUE!	NA
gene-paeni_NIB01_000556	paeni_NIB01_000556	572907	575832	-		rRNA																					operon0325	operon0112							#N/A	#N/A	#N/A	#N/A	#N/A	#N/A	#N/A	NA	NA	NA	NA	NA	NA	#VALUE!	NA
gene-paeni_NIB01_000557	paeni_NIB01_000557	576173	577725	-		rRNA																					operon0325								#N/A	#N/A	#N/A	#N/A	#N/A	#N/A	#N/A	NA	NA	NA	NA	NA	NA	#VALUE!	NA
agat-gene-513	paeni_NIB01_000558	578504	579049	-		protein_coding					GNAT family N-acetyltransferase		GNAT family acetyltransferase	yhfO	-	-	ko:K03825	-	-	-	-	ko00000,ko01000	-	-	-	Acetyltransf_1	operon0326	operon0113							0.459998	0.668808	0.609397	0.282145	0.0680809	0.0513968	FALSE	NA	NA	NA	NA	NA	NA	#VALUE!	9.68921
agat-gene-516	paeni_NIB01_000561	582626	583474	-		protein_coding					carbohydrate ABC transporter permease		ABC transporter permease	-	-	-	ko:K02026	-	M00207	-	-	ko00000,ko00002,ko02000	3.A.1.1	-	-	BPD_transp_1	operon0327	operon0113							4.89326	5.31888	5.26054	2.80235e-06	4.84679e-06	2.77124e-33	TRUE	NA	NA	NA	NA	NA	NA	#VALUE!	1.1383
agat-gene-514	paeni_NIB01_000559	579101	580705	-		protein_coding			phosphorelay signal transduction system|0000160||IEA	GO:0000160	response regulator		COG4753 Response regulator containing CheY-like receiver domain and AraC-type DNA-binding domain	-	-	-	ko:K07720	ko02020,map02020	M00519	-	-	ko00000,ko00001,ko00002,ko02022	-	-	-	HTH_18,HTH_AraC,Response_reg	operon0327	operon0113							1.86463	2.21832	2.08795	0.00117359	0.0012181	1.91005e-06	TRUE	NA	NA	NA	NA	NA	NA	#VALUE!	8.68773
agat-gene-515	paeni_NIB01_000560	580702	582600	-		protein_coding					sensor histidine kinase		Histidine kinase	-	-	-	-	-	-	-	-	-	-	-	-	HAMP,HATPase_c,His_kinase,dCache_1	operon0327	operon0113							4.33878	4.6286	4.56323	2.39304e-06	8.11537e-06	2.2636e-27	TRUE	NA	NA	NA	NA	NA	NA	#VALUE!	2.57759
agat-gene-517	paeni_NIB01_000562	583471	584421	-		protein_coding					sugar ABC transporter permease		ABC transporter permease	-	-	-	ko:K02025,ko:K15771	ko02010,map02010	M00207,M00491	-	-	ko00000,ko00001,ko00002,ko02000	3.A.1.1,3.A.1.1.16,3.A.1.1.2	-	-	BPD_transp_1	operon0327	operon0113							5.53841	5.84651	5.79573	7.80155e-07	2.2286e-06	4.29277e-43	TRUE	NA	NA	NA	NA	NA	NA	#VALUE!	1.30248
agat-gene-518	paeni_NIB01_000563	584468	585802	-		protein_coding					sugar ABC transporter substrate-binding protein		ABC-type sugar transport system, periplasmic component	-	-	-	ko:K02027	-	M00207	-	-	ko00000,ko00002,ko02000	3.A.1.1	-	-	SBP_bac_1,SBP_bac_8	operon0327	operon0113							6.52152	6.87378	6.82976	4.90091e-07	1.12225e-06	6.76894e-58	TRUE	NA	NA	NA	NA	NA	NA	#VALUE!	1.20944
agat-gene-519	paeni_NIB01_000564	586148	588400	-		protein_coding					glycoside hydrolase family 88 protein		unsaturated glucuronyl hydrolase involved in regulation of bacterial surface properties, and related proteins	-	-	-	-	-	-	-	-	-	-	-	-	Glyco_hydro_88	operon0328								4.51449	4.58219	4.56119	3.14746e-08	4.83628e-08	5.63171e-117	TRUE	0.774799	0.906761	0.804898	0.0019619	0.00197356	0.000433383	FALSE	8.2034
agat-gene-520	paeni_NIB01_000565	588753	589571	-		protein_coding					endonuclease/exonuclease/phosphatase family protein		Endonuclease/Exonuclease/phosphatase family	rgfB	-	3.1.3.90	ko:K06896	ko00500,map00500	-	R10486	RC00017	ko00000,ko00001,ko01000	-	-	-	Exo_endo_phos	operon0329								-1.01544	-1.1052	-1.09386	0.00241918	0.000262693	1.54708e-07	TRUE	0.692081	0.757781	0.683252	0.0002393	0.00177026	0.000184817	FALSE	54.641
agat-gene-522	paeni_NIB01_000567	591570	594584	+		protein_coding					DEAD/DEAH box helicase		helicase	ywqA	-	-	-	-	-	-	-	-	-	-	-	DUF3670,Helicase_C,SNF2_N	operon0330	operon0114							-1.28766	-1.2422	-1.23718	5.4872e-06	2.13181e-05	1.17016e-18	TRUE	-0.309921	-0.345541	-0.359075	0.00613989	0.0131929	0.000680568	FALSE	259.964
agat-gene-521	paeni_NIB01_000566	589795	591564	+		protein_coding					SWIM zinc finger family protein		Zinc finger, swim domain protein	CP_1020	-	-	-	-	-	-	-	-	-	-	-	Helicase_C,SNF2_N,SNF2_assoc,SWIM	operon0330	operon0114							-0.926471	-0.895159	-0.89988	0.000101573	0.000209174	2.8359e-12	FALSE	0.103616	0.0888742	0.0587337	0.362737	0.52713	0.682038	FALSE	87.4793
agat-gene-523	paeni_NIB01_000568	594688	595146	-		protein_coding					hypothetical protein		-	bsp22	-	-	-	-	-	-	-	-	-	-	-	-	operon0331								-0.653674	-0.705752	-0.705211	0.0247795	0.00789964	0.00112609	FALSE	-0.796914	-0.880858	-0.785953	0.0134831	0.0138509	0.00511382	FALSE	21.1981
agat-gene-524	paeni_NIB01_000569	595319	595816	-		protein_coding					GyrI-like domain-containing protein		Bacterial transcription activator, effector binding domain	-	-	-	ko:K13653	-	-	-	-	ko00000,ko03000	-	-	-	Cass2,GyrI-like,HTH_18	operon0332								0.579831	0.49945	NA	0.256223	0.348926	NA	#VALUE!	NA	NA	NA	NA	NA	NA	#VALUE!	2.2164
agat-gene-525	paeni_NIB01_000570	595915	596847	+		protein_coding					YafY family transcriptional regulator		WYL domain	-	-	-	-	-	-	-	-	-	-	-	-	HTH_11,WYL	operon0333								-0.443525	-0.537528	-0.548252	0.0813065	0.0325059	0.00747026	FALSE	0.526933	0.351769	0.231463	0.0989435	0.288861	0.400932	FALSE	20.2185
agat-gene-526	paeni_NIB01_000571	596911	597861	-		protein_coding					2-keto-3-deoxygluconate permease		2-keto-3-deoxygluconate permease	kdgT1	-	-	ko:K02526	-	-	-	-	ko00000,ko02000	2.A.10.1	-	-	KdgT	operon0334	operon0115							1.30932	1.18048	1.13355	0.000242265	0.000613443	8.98995e-09	TRUE	NA	NA	NA	NA	NA	NA	#VALUE!	4.38628
agat-gene-528	paeni_NIB01_000573	599401	601335	-		protein_coding		beta-glucoside transmembrane transporter activity|0015573||IEA	phosphoenolpyruvate-dependent sugar phosphotransferase system|0009401||IEA, beta-glucoside transport|0015759||IEA	GO:0009401, GO:0015759, GO:0015573	beta-glucoside-specific PTS transporter subunit IIABC		COG1264 Phosphotransferase system IIB components	-	-	-	ko:K02755,ko:K02756,ko:K02757	ko02060,map02060	M00271	-	-	ko00000,ko00001,ko00002,ko01000,ko02000	4.A.1.2.11,4.A.1.2.2,4.A.1.2.5,4.A.1.2.6	-	-	PTS_EIIA_1,PTS_EIIB,PTS_EIIC	operon0334	operon0115							3.40692	3.41292	3.37328	4.90089e-07	7.67281e-07	5.05987e-47	TRUE	NA	NA	NA	NA	NA	NA	#VALUE!	2.40246
agat-gene-527	paeni_NIB01_000572	597868	599325	-		protein_coding			carbohydrate metabolic process|0005975||IEA	GO:0005975	family 1 glycosylhydrolase		Glycosyl hydrolase family 1	-	-	3.2.1.86	ko:K01223	ko00010,ko00500,map00010,map00500	-	R00839,R05133,R05134	RC00049,RC00171,RC00714	ko00000,ko00001,ko01000	-	GT1	-	Glyco_hydro_1	operon0334	operon0115							2.41303	2.39879	2.35575	2.92116e-06	2.22555e-06	1.05057e-33	TRUE	NA	NA	NA	NA	NA	NA	#VALUE!	3.81439
agat-gene-529	paeni_NIB01_000574	601472	602296	-		protein_coding			regulation of transcription, DNA-templated|0006355||IEA	GO:0006355	PRD domain-containing protein		CAT RNA binding domain	-	-	-	ko:K02538,ko:K03488	-	-	-	-	ko00000,ko03000	-	-	-	CAT_RBD,PRD,PTS_EIIA_2	operon0334								4.37834	4.33661	4.30843	7.65126e-08	2.23193e-07	6.93581e-65	TRUE	-0.621135	-0.62622	-0.582788	0.00136273	0.0163363	0.00535481	FALSE	17.6983
agat-gene-530	paeni_NIB01_000575	602619	603251	+	udk	protein_coding		uridine kinase activity|0004849||IEA		GO:0004849	uridine kinase		Cytidine monophosphokinase	udk	GO:0003674,GO:0003824,GO:0004849,GO:0005575,GO:0005622,GO:0005623,GO:0005737,GO:0005829,GO:0006139,GO:0006206,GO:0006213,GO:0006220,GO:0006221,GO:0006222,GO:0006725,GO:0006753,GO:0006793,GO:0006796,GO:0006807,GO:0008150,GO:0008152,GO:0008655,GO:0009058,GO:0009112,GO:0009116,GO:0009117,GO:0009119,GO:0009123,GO:0009124,GO:0009129,GO:0009130,GO:0009156,GO:0009161,GO:0009163,GO:0009165,GO:0009173,GO:…	2.7.1.48	ko:K00876	ko00240,ko00983,ko01100,map00240,map00983,map01100	-	R00513,R00516,R00517,R00962,R00964,R00967,R00968,R00970,R01548,R01549,R01880,R02091,R02096,R02097,R02327,R02332,R02371,R02372,R08232	RC00002,RC00017	ko00000,ko00001,ko01000	-	-	iSBO_1134.SBO_0893	PRK	operon0335								-3.60558	-3.3946	-3.37155	4.25378e-07	1.14929e-06	3.43744e-40	TRUE	-0.474544	-0.679781	-0.610389	0.0366169	0.0225937	0.0102582	FALSE	167.234
agat-gene-531	paeni_NIB01_000576	603582	604418	-		protein_coding					AraC family transcriptional regulator		AraC family transcriptional regulator	msmR5	-	-	-	-	-	-	-	-	-	-	-	AraC_binding,HTH_18,HTH_AraC	operon0336								-1.26849	-1.43081	-1.41632	0.00319446	0.00010036	2.16231e-09	TRUE	-0.431766	-0.428644	-0.363036	0.0838623	0.129717	0.141689	FALSE	22.454
agat-gene-532	paeni_NIB01_000577	604615	605916	+		protein_coding					alpha-glucosidase/alpha-galactosidase		Catalyses the hydrolysis of terminal non-reducing alpha-D-galactose residues in alpha-D-galactosides	melA	GO:0000166,GO:0003674,GO:0003824,GO:0004553,GO:0004557,GO:0005488,GO:0005575,GO:0005622,GO:0005623,GO:0005737,GO:0005829,GO:0005975,GO:0005984,GO:0005994,GO:0005995,GO:0008150,GO:0008152,GO:0009056,GO:0009311,GO:0009313,GO:0009987,GO:0015925,GO:0016052,GO:0016787,GO:0016798,GO:0030145,GO:0036094,GO:0043167,GO:0043168,GO:0043169,GO:0044237,GO:0044238,GO:0044248,GO:0044262,GO:0044275,GO:0044424,GO:…	3.2.1.22,3.2.1.86	ko:K01222,ko:K07406	ko00010,ko00052,ko00500,ko00561,ko00600,ko00603,map00010,map00052,map00500,map00561,map00600,map00603	-	R00839,R01101,R01103,R01104,R01194,R01329,R02926,R03634,R04019,R04470,R05133,R05134,R05549,R05961,R06091	RC00049,RC00059,RC00171,RC00451,RC00714	ko00000,ko00001,ko01000	-	GT4	iECH74115_1262.ECH74115_5633,iECSP_1301.ECSP_5218,iECs_1301.ECs5101	Glyco_hydro_4,Glyco_hydro_4C	operon0337								-0.891645	-1.04391	-1.0305	0.00955607	0.000988911	2.19267e-06	FALSE	-0.178542	-0.157052	-0.141354	0.505304	0.573895	0.582608	FALSE	34.5101
agat-gene-534	paeni_NIB01_000579	606706	608286	-		protein_coding					ATP-binding protein		GAF domain	kdpD	-	2.7.13.3	ko:K07646	ko02020,map02020	M00454	-	-	ko00000,ko00001,ko00002,ko01000,ko01001,ko02022	-	-	-	DUF4118,GAF_3,HATPase_c,HisKA,KdpD,Usp	operon0338	operon0116							-1.78447	-1.86179	-1.8535	6.08563e-05	3.05761e-06	3.59456e-24	TRUE	-1.77546	-1.76011	-1.76409	2.91809e-08	3.39844e-06	1.31767e-30	TRUE	86.9648
agat-gene-535	paeni_NIB01_000580	608295	610634	-		protein_coding					histidine kinase		Histidine kinase	kdpD	-	2.7.13.3	ko:K07646	ko02020,map02020	M00454	-	-	ko00000,ko00001,ko00002,ko01000,ko01001,ko02022	-	-	-	KdpD,Usp	operon0338	operon0116							-1.04233	-1.14083	-1.1206	0.00172405	0.00100997	1.43203e-06	TRUE	-2.2515	-2.29359	-2.28476	6.1464e-09	5.34646e-06	2.48456e-28	TRUE	46.0108
agat-gene-538	paeni_NIB01_000583	613571	615250	-	kdpA	protein_coding	potassium ion-transporting ATPase complex|0031004||IEA	P-type potassium transmembrane transporter activity|0008556||IEA	potassium ion transport|0006813||IEA	GO:0006813, GO:0008556, GO:0031004	potassium-transporting ATPase subunit KdpA		Part of the high-affinity ATP-driven potassium transport (or Kdp) system, which catalyzes the hydrolysis of ATP coupled with the electrogenic transport of potassium into the cytoplasm. This subunit binds and transports the potassium across the cytoplasmic membrane	kdpA	GO:0003674,GO:0003824,GO:0005215,GO:0005488,GO:0005575,GO:0005618,GO:0005623,GO:0005886,GO:0006810,GO:0006811,GO:0006812,GO:0006813,GO:0008150,GO:0008324,GO:0008556,GO:0009987,GO:0015075,GO:0015077,GO:0015079,GO:0015318,GO:0015399,GO:0015405,GO:0015662,GO:0015672,GO:0016020,GO:0016462,GO:0016787,GO:0016817,GO:0016818,GO:0016887,GO:0017111,GO:0019829,GO:0022804,GO:0022853,GO:0022857,GO:0022890,GO:…	3.6.3.12	ko:K01546	ko02020,map02020	-	-	-	ko00000,ko00001,ko01000	3.A.3.7	-	iSB619.SA_RS00490	KdpA	operon0338	operon0116							1.78264	1.79135	1.75885	4.14446e-06	6.15917e-06	8.42766e-27	TRUE	-2.29041	-2.40441	-2.3805	1.0074e-08	1.22719e-05	1.48315e-22	TRUE	9.2514
agat-gene-537	paeni_NIB01_000582	611359	613503	-	kdpB	protein_coding	potassium ion-transporting ATPase complex|0031004||IEA	P-type potassium transmembrane transporter activity|0008556||IEA	potassium ion transport|0006813||IEA	GO:0006813, GO:0008556, GO:0031004	potassium-transporting ATPase subunit KdpB		Part of the high-affinity ATP-driven potassium transport (or Kdp) system, which catalyzes the hydrolysis of ATP coupled with the electrogenic transport of potassium into the cytoplasm. This subunit is responsible for energy coupling to the transport system	kdpB	-	3.6.3.12	ko:K01547	ko02020,map02020	-	-	-	ko00000,ko00001,ko01000	3.A.3.7	-	iSB619.SA_RS00495	E1-E2_ATPase,Hydrolase	operon0338	operon0116							1.0242	1.00307	0.952229	0.00136903	0.0032152	7.80471e-05	FALSE	-2.54972	-2.66977	-2.64357	7.33885e-09	1.04805e-05	4.72067e-24	TRUE	13.4954
agat-gene-536	paeni_NIB01_000581	610763	611323	-	kdpC	protein_coding	integral component of membrane|0016021||IEA	P-type potassium transmembrane transporter activity|0008556||IEA	potassium ion transport|0006813||IEA	GO:0006813, GO:0008556, GO:0016021	potassium-transporting ATPase subunit KdpC		Part of the high-affinity ATP-driven potassium transport (or Kdp) system, which catalyzes the hydrolysis of ATP coupled with the electrogenic transport of potassium into the cytoplasm. This subunit acts as a catalytic chaperone that increases the ATP- binding affinity of the ATP-hydrolyzing subunit KdpB by the formation of a transient KdpB KdpC ATP ternary complex	kdpC	GO:0003674,GO:0003824,GO:0005215,GO:0005575,GO:0005623,GO:0005886,GO:0006810,GO:0006811,GO:0006812,GO:0006813,GO:0008150,GO:0008324,GO:0008556,GO:0009987,GO:0015075,GO:0015077,GO:0015079,GO:0015318,GO:0015399,GO:0015405,GO:0015662,GO:0015672,GO:0016020,GO:0016021,GO:0016462,GO:0016787,GO:0016817,GO:0016818,GO:0016887,GO:0017111,GO:0019829,GO:0022804,GO:0022853,GO:0022857,GO:0022890,GO:0030001,GO:…	3.6.3.12	ko:K01548	ko02020,map02020	-	-	-	ko00000,ko00001,ko01000	3.A.3.7	-	iEcE24377_1341.EcE24377A_0722,ic_1306.c0781	KdpC	operon0338	operon0116							1.40097	1.45101	1.36873	0.00406438	0.0061618	0.000219383	TRUE	-2.60256	-2.74646	-2.72256	1.36226e-08	7.33454e-06	3.81222e-26	TRUE	3.91016
agat-gene-533	paeni_NIB01_000578	606006	606704	-		protein_coding			phosphorelay signal transduction system|0000160||IEA	GO:0000160	response regulator		XRE family transcriptional regulator	kdpE	-	-	ko:K07667	ko02020,ko02024,map02020,map02024	M00454	-	-	ko00000,ko00001,ko00002,ko02022	-	-	-	Response_reg,Trans_reg_C	operon0338	operon0116							-1.84032	-1.94904	-1.92687	0.000171743	7.17438e-06	2.3788e-18	TRUE	-1.78017	-1.83267	-1.83355	1.607e-07	3.93078e-06	1.30629e-25	TRUE	34.9069
agat-gene-540	paeni_NIB01_000585	617036	617794	-		protein_coding					hypothetical protein		-	-	-	-	-	-	-	-	-	-	-	-	-	-	operon0339	operon0117							1.30051	1.35432	1.32801	8.11722e-06	1.00181e-05	1.53793e-19	TRUE	-0.3042	-0.185621	-0.191998	0.0230584	0.295503	0.25003	FALSE	54.3811
agat-gene-539	paeni_NIB01_000584	615808	617004	-		protein_coding					XRE family transcriptional regulator		IrrE N-terminal-like domain	spiA	-	-	ko:K18831	-	-	-	-	ko00000,ko02048,ko03000	-	-	-	EntA_Immun,HTH_3,Peptidase_M78	operon0339	operon0117							1.02676	1.04314	1.02394	2.76935e-06	1.11749e-05	7.87557e-25	TRUE	-0.0637364	0.0798788	0.0491814	0.629443	0.652816	0.786884	FALSE	89.0171
agat-gene-541	paeni_NIB01_000586	617906	618445	-	ytxJ	protein_coding			sulfur compound metabolic process|0006790||IEA	GO:0006790	bacillithiol system redox-active protein YtxJ		Protein of unknown function (DUF2847)	ytxJ	-	-	ko:K20541,ko:K20543	-	-	-	-	ko00000,ko02000	1.B.55.3,4.D.3.1.6	-	-	DUF2847	operon0340								0.329356	0.316747	0.307695	0.0590028	0.0745607	0.0199566	FALSE	0.161451	0.138208	0.0968756	0.369078	0.536071	0.651776	FALSE	18.5439
agat-gene-542	paeni_NIB01_000587	618818	619696	+		protein_coding					hypothetical protein		-	-	-	-	-	-	-	-	-	-	-	-	-	-	operon0341								-0.367899	-0.367873	-0.374055	0.00341013	0.00715216	1.0575e-06	FALSE	0.850508	0.81216	0.758224	1.42902e-05	0.000306902	1.41609e-07	FALSE	119.223
agat-gene-543	paeni_NIB01_000588	619828	620259	-		protein_coding					VOC family protein		3-demethylubiquinone-9 3-methyltransferase	XK27_00770	-	-	ko:K04750	-	-	-	-	ko00000	-	-	-	3-dmu-9_3-mt,Glyoxalase	operon0342								1.71904	1.63565	1.58323	4.08371e-05	0.000119674	3.06883e-12	TRUE	-0.147861	-0.296324	-0.277856	0.441773	0.180792	0.171296	FALSE	5.26189
agat-gene-544	paeni_NIB01_000589	620530	620757	-		protein_coding					DNA-binding protein		-	-	-	-	-	-	-	-	-	-	-	-	-	-	operon0343								0.265058	0.336499	0.323106	0.124859	0.0711698	0.0543307	FALSE	-0.208444	-0.242563	-0.241312	0.144146	0.18671	0.164361	FALSE	112.667
agat-gene-546	paeni_NIB01_000591	621936	622811	-		protein_coding					sugar phosphate isomerase/epimerase		xylose isomerase	-	-	-	-	-	-	-	-	-	-	-	-	AP_endonuc_2,AP_endonuc_2_N	operon0344	operon0118							-0.0205429	0.242857	0.22933	0.963285	0.478	0.499066	FALSE	0.893264	0.933453	0.80094	0.00139111	0.00603387	0.00211868	FALSE	40.6011
agat-gene-545	paeni_NIB01_000590	621051	621923	-		protein_coding					sugar phosphate isomerase/epimerase		sugar phosphate isomerase	-	-	-	-	-	-	-	-	-	-	-	-	AP_endonuc_2	operon0344	operon0118							0.140095	0.427468	0.391089	0.749635	0.218994	0.226859	FALSE	0.509954	0.693767	0.56902	0.0491745	0.0238385	0.0209298	FALSE	35.1367
agat-gene-552	paeni_NIB01_000597	633514	634494	-		protein_coding	membrane|0016020||IEA			GO:0016020	ABC transporter permease subunit		Sugar ABC transporter permease	-	-	-	ko:K02025,ko:K17319	ko02010,map02010	M00207,M00603	-	-	ko00000,ko00001,ko00002,ko02000	3.A.1.1,3.A.1.1.29,3.A.1.1.9	-	-	BPD_transp_1	operon0345	operon0120							5.95574	6.15174	6.12357	4.88124e-08	8.35388e-08	1.02346e-114	TRUE	NA	NA	NA	NA	NA	NA	#VALUE!	0.818151
agat-gene-547	paeni_NIB01_000592	622950	626051	-		protein_coding					alpha-mannosidase		Alpha-mannosidase	-	-	3.2.1.24	ko:K01191	ko00511,map00511	-	-	-	ko00000,ko00001,ko01000,ko04131	-	GH38	-	Alpha-mann_mid,Glyco_hydro_38,Glyco_hydro_38C	operon0345	operon0119							1.42113	1.55553	1.51841	4.16616e-05	5.72206e-05	4.67641e-13	TRUE	-0.0920542	-0.279243	-0.236285	0.769683	0.364368	0.353884	FALSE	17.8078
agat-gene-551	paeni_NIB01_000596	632590	633498	-		protein_coding					carbohydrate ABC transporter permease		binding-protein-dependent transport systems inner membrane component	-	-	-	ko:K02026,ko:K10234,ko:K17320	ko02010,map02010	M00201,M00207,M00603	-	-	ko00000,ko00001,ko00002,ko02000	3.A.1.1,3.A.1.1.29,3.A.1.1.32,3.A.1.1.8,3.A.1.1.9	-	-	BPD_transp_1	operon0345	operon0120							5.90726	6.03856	5.99643	2.00427e-07	3.02861e-07	1.7653e-75	TRUE	NA	NA	NA	NA	NA	NA	#VALUE!	0.574621
agat-gene-550	paeni_NIB01_000595	630824	632461	-		protein_coding					extracellular solute-binding protein		PFAM extracellular solute-binding protein family 1	-	-	-	-	-	-	-	-	-	-	-	-	SBP_bac_1,SBP_bac_8	operon0345								6.41108	6.63661	6.60468	5.12711e-08	1.15609e-07	2.27143e-108	TRUE	NA	NA	NA	NA	NA	NA	#VALUE!	1.93182
agat-gene-548	paeni_NIB01_000593	626048	628360	-		protein_coding			carbohydrate metabolic process|0005975||IEA	GO:0005975	glycoside hydrolase family 3 C-terminal domain-containing protein		Belongs to the glycosyl hydrolase 3 family	-	-	3.2.1.21,3.2.1.52	ko:K01207,ko:K05349	ko00460,ko00500,ko00520,ko00531,ko00940,ko01100,ko01110,ko01501,map00460,map00500,map00520,map00531,map00940,map01100,map01110,map01501	M00628	R00022,R00026,R02558,R02887,R02985,R03527,R04949,R04998,R05963,R07809,R07810,R10035,R10039,R10040,R10831	RC00049,RC00059,RC00171,RC00262,RC00397,RC00451,RC00714,RC00746,RC01248	ko00000,ko00001,ko00002,ko01000	-	GH3	-	Fn3-like,Glyco_hydro_3,Glyco_hydro_3_C	operon0345	operon0119							2.58795	2.64385	2.60803	2.10053e-06	3.42589e-06	1.4249e-32	TRUE	NA	NA	NA	NA	NA	NA	#VALUE!	6.78874
agat-gene-549	paeni_NIB01_000594	628405	630627	-		protein_coding			regulation of transcription, DNA-templated|0006355||IEA	GO:0006355	helix-turn-helix domain-containing protein		COG2207 AraC-type DNA-binding domain-containing proteins	-	-	-	-	-	-	-	-	-	-	-	-	HTH_18,dCache_1	operon0345	operon0119							4.05497	4.12691	4.10252	5.19312e-08	1.76323e-07	2.7892e-85	TRUE	NA	NA	NA	NA	NA	NA	#VALUE!	3.38479
agat-gene-553	paeni_NIB01_000598	634808	636220	-		protein_coding					alpha-L-fucosidase		Alpha-L-fucosidase	-	-	3.2.1.51	ko:K01206	ko00511,map00511	-	-	-	ko00000,ko00001,ko01000,ko04147	-	GH29	-	Alpha_L_fucos,Fucosidase_C	operon0346								1.34994	1.49948	1.46594	3.74224e-05	3.43784e-05	1.30051e-13	TRUE	-0.866255	-0.993646	-0.943765	0.000824306	0.00144995	6.19455e-05	FALSE	43.9777
agat-gene-554	paeni_NIB01_000599	636676	637734	-		protein_coding					Gfo/Idh/MocA family oxidoreductase		Oxidoreductase	-	-	-	-	-	-	-	-	-	-	-	-	GFO_IDH_MocA,GFO_IDH_MocA_C	operon0347								0.936081	1.0646	1.03342	0.000385092	0.000284678	8.26765e-08	FALSE	-0.627929	-0.677664	-0.652801	0.00173288	0.00383791	0.000544118	FALSE	43.0583
agat-gene-555	paeni_NIB01_000600	638024	638890	-		protein_coding					sugar phosphate isomerase/epimerase		sugar phosphate isomerase	-	-	-	-	-	-	-	-	-	-	-	-	AP_endonuc_2	operon0347								0.971275	1.16888	1.13011	0.000865793	0.000276629	9.34062e-08	FALSE	-0.319951	-0.330749	-0.326037	0.042183	0.0572306	0.0561096	FALSE	35.3337
agat-gene-556	paeni_NIB01_000601	639033	640421	-		protein_coding			carbohydrate metabolic process|0005975||IEA	GO:0005975	alpha-L-fucosidase		alpha-L-fucosidase	fucA	-	3.2.1.51	ko:K01206	ko00511,map00511	-	-	-	ko00000,ko00001,ko01000,ko04147	-	GH29	-	Alpha_L_fucos,Calx-beta,F5_F8_type_C,FIVAR,G5,Gram_pos_anchor,Trypsin_2,YSIRK_signal	operon0348								0.343306	0.380885	0.352845	0.127852	0.125287	0.108746	FALSE	-0.666231	-0.851388	-0.708162	0.0351476	0.0292338	0.0163525	FALSE	16.2125
agat-gene-557	paeni_NIB01_000602	640592	640762	-		protein_coding					hypothetical protein																operon0349								0.187801	0.143637	0.114803	0.311816	0.473688	0.511731	FALSE	NA	NA	NA	NA	NA	NA	#VALUE!	12.4063
agat-gene-558	paeni_NIB01_000603	640949	641137	-		protein_coding					hypothetical protein		-	-	-	-	-	-	-	-	-	-	-	-	-	-	operon0350	operon0121							1.58079	1.52582	1.4922	9.44867e-06	3.23211e-05	3.08899e-16	TRUE	-0.141762	-0.0317322	-0.0497691	0.661653	0.934014	0.865671	FALSE	26.5037
agat-gene-559	paeni_NIB01_000604	641239	644025	-		protein_coding			carbohydrate metabolic process|0005975||IEA	GO:0005975	glycoside hydrolase family 3 C-terminal domain-containing protein		Belongs to the glycosyl hydrolase 3 family	-	-	3.2.1.21	ko:K05349	ko00460,ko00500,ko00940,ko01100,ko01110,map00460,map00500,map00940,map01100,map01110	-	R00026,R02558,R02887,R02985,R03527,R04949,R04998,R10035,R10039,R10040	RC00049,RC00059,RC00171,RC00262,RC00397,RC00451,RC00714,RC00746,RC01248	ko00000,ko00001,ko01000	-	GH3	-	Fn3-like,Glyco_hydro_3,Glyco_hydro_3_C	operon0351	operon0121							-0.731267	-0.905645	-0.881194	0.00882299	0.0022893	0.000121448	FALSE	0.0171268	0.179675	0.139367	0.906515	0.278527	0.391816	FALSE	186.886
agat-gene-560	paeni_NIB01_000605	644250	645338	-		protein_coding					low temperature requirement protein A		Low temperature requirement protein A	ltrA	-	-	-	-	-	-	-	-	-	-	-	LtrA	operon0352	operon0122							1.00921	0.986135	0.976255	0.00052373	0.000468244	3.58384e-10	FALSE	1.13429	1.34095	1.24648	5.29504e-05	0.000254803	2.42129e-07	TRUE	10.4718
agat-gene-561	paeni_NIB01_000606	645398	646360	-		protein_coding					ring-cleaving dioxygenase		Ring-cleaving dioxygenase	ydfO1	-	-	ko:K15975	-	-	-	-	ko00000	-	-	-	Glyoxalase	operon0352	operon0122							1.70165	1.58372	1.51454	0.000125452	0.000423621	1.06132e-08	TRUE	0.742207	0.685327	0.605568	0.000447032	0.00254298	0.00186535	FALSE	8.54544
agat-gene-562	paeni_NIB01_000607	646429	646656	-		protein_coding					DUF896 domain-containing protein		UPF0291 protein	ynzC	-	-	-	-	-	-	-	-	-	-	-	DUF896	operon0353	operon0122							3.69864	3.44455	3.34861	1.06868e-05	2.22223e-05	6.86083e-20	TRUE	NA	NA	NA	NA	NA	NA	#VALUE!	0.621138
agat-gene-566	paeni_NIB01_000611	649813	650517	-		protein_coding					PspA/IM30 family protein		Phage shock protein A (IM30), suppresses sigma54-dependent transcription	pspA	GO:0005575,GO:0005622,GO:0005623,GO:0005737,GO:0005829,GO:0044424,GO:0044444,GO:0044464	-	ko:K03969	-	-	-	-	ko00000	-	-	-	PspA_IM30	operon0354	operon0123							1.83552	1.84807	1.8132	1.97702e-06	9.04529e-06	4.93137e-20	TRUE	0.540555	0.53743	0.469993	0.00227007	0.00842257	0.0058776	FALSE	25.7841
agat-gene-563	paeni_NIB01_000608	646857	647873	-		protein_coding					SPFH domain-containing protein		virion core protein (lumpy skin disease virus)	ydjI	-	-	-	-	-	-	-	-	-	-	-	Band_7_1,DZR,zf-ribbon_3,zinc_ribbon_2	operon0354	operon0123							1.46195	1.46174	1.43163	4.24337e-06	2.33897e-05	1.22092e-14	TRUE	0.307112	0.422619	0.347522	0.047075	0.0595654	0.0764145	FALSE	72.9988
agat-gene-565	paeni_NIB01_000610	648745	649776	-		protein_coding					TFIIB-type zinc ribbon-containing protein		Involved in the restart of stalled replication forks. Recognizes and binds the arrested nascent DNA chain at stalled replication forks. It can open the DNA duplex, via its helicase activity, and promote assembly of the primosome and loading of the major replicative helicase DnaB onto DNA	ydjG	-	3.6.4.12	ko:K04066,ko:K10742	ko03030,ko03440,map03030,map03440	-	-	-	ko00000,ko00001,ko01000,ko03032,ko03400	-	-	-	AAA_11,AAA_12,DUF4011,TF_Zn_Ribbon	operon0354	operon0123							0.616328	0.630761	0.596788	0.000610516	0.000848754	3.94394e-08	FALSE	0.245778	0.330506	0.270879	0.139927	0.0853796	0.128086	FALSE	25.453
agat-gene-564	paeni_NIB01_000609	647945	648721	-		protein_coding					TPM domain-containing protein		Beta-propeller domains of methanol dehydrogenase type	ydjH	-	-	ko:K06872	-	-	-	-	ko00000	-	-	-	TPM_phosphatase	operon0354	operon0123							1.0068	1.02658	0.98956	4.99539e-05	8.20399e-05	5.55605e-13	FALSE	NA	NA	NA	NA	NA	NA	#VALUE!	22.7933
agat-gene-567	paeni_NIB01_000612	650722	651675	-		protein_coding					alpha/beta hydrolase		Alpha beta hydrolase	-	-	-	-	-	-	-	-	-	-	-	-	Abhydrolase_1,Abhydrolase_6	operon0355	operon0124				c2	Threonate_Erythronate		-1.67029	-1.62551	-1.60274	5.31976e-05	1.53975e-05	2.93746e-17	TRUE	0.613678	0.853719	0.724282	0.010173	0.0113831	0.00386005	FALSE	30.8709
agat-gene-568	paeni_NIB01_000613	651765	652004	-		protein_coding					hypothetical protein		-	-	-	-	-	-	-	-	-	-	-	-	-	-	operon0356	operon0124				c2	Threonate_Erythronate		0.301578	0.601306	0.550591	0.345618	0.0960036	0.0574455	FALSE	NA	NA	NA	NA	NA	NA	#VALUE!	3.51887
agat-gene-569	paeni_NIB01_000614	652233	653915	+		protein_coding			phosphorelay signal transduction system|0000160||IEA	GO:0000160	PrpR N-terminal domain-containing protein		Propionate catabolism activator	-	-	-	ko:K02688,ko:K21405	-	-	-	-	ko00000,ko03000	-	-	-	HTH_8,PAS,PrpR_N,Sigma54_activ_2,Sigma54_activat	operon0357					c2	Threonate_Erythronate		-0.601148	-0.763021	-0.75158	0.0718832	0.01331	0.00162656	FALSE	0.700968	0.696762	0.621702	0.000214911	0.00302522	0.000574898	FALSE	37.4899
agat-pseudogene-3	paeni_NIB01_000615	654082	655067	+		pseudogene					2-keto-3-deoxygluconate permease	frameshifted															operon0358	operon0125				c2	Threonate_Erythronate		0.26735	0.311355	0.318125	0.589819	0.54509	0.450372	FALSE	NA	NA	NA	NA	NA	NA	#VALUE!	4.92259
agat-gene-571	paeni_NIB01_000617	656454	657455	+	pdxA	protein_coding		4-hydroxythreonine-4-phosphate dehydrogenase activity|0050570||IEA	pyridoxine biosynthetic process|0008615||IEA	GO:0008615, GO:0050570	4-hydroxythreonine-4-phosphate dehydrogenase PdxA		Belongs to the PdxA family	pdxA	-	1.1.1.262,1.1.1.408,1.1.1.409	ko:K00097,ko:K22024	ko00750,ko01100,map00750,map01100	M00124	R05681,R05837,R07406	RC00089,RC00675,RC01475	ko00000,ko00001,ko00002,ko01000	-	-	-	DUF1357_C,DUF1537,PdxA	operon0359	operon0125				c2	Threonate_Erythronate		-0.422118	-0.4799	-0.498448	0.0306351	0.0160859	0.00125246	FALSE	-0.34196	-0.482688	-0.383351	0.21105	0.149535	0.148899	FALSE	29.5328
agat-gene-570	paeni_NIB01_000616	655162	656457	+		protein_coding					four-carbon acid sugar kinase family protein		Putative nucleotide-binding of sugar-metabolising enzyme	-	-	2.7.1.219,2.7.1.220	ko:K22129	-	-	-	-	ko00000,ko01000	-	-	-	DUF1357_C,DUF1537	operon0359	operon0125				c2	Threonate_Erythronate		-0.590455	-0.663401	-0.662717	0.0471721	0.03044	0.00466855	FALSE	0.475897	0.266793	0.170432	0.243937	0.604051	0.573239	FALSE	17.4083
agat-gene-572	paeni_NIB01_000618	657739	658662	-		protein_coding					AraC family transcriptional regulator		AraC family transcriptional regulator	-	-	-	ko:K02855,ko:K03490	-	-	-	-	ko00000,ko03000	-	-	-	AraC_binding,HTH_18,HTH_AraC	operon0360					c2	Threonate_Erythronate		1.44698	1.47922	1.43525	9.39932e-05	7.48594e-05	1.54797e-12	TRUE	0.475014	0.367544	0.308069	0.00934036	0.0553818	0.0838766	FALSE	11.2872
agat-gene-573	paeni_NIB01_000619	658862	662035	+		protein_coding					alpha-mannosidase		Alpha-mannosidase	mngB	-	3.2.1.24	ko:K01191	ko00511,map00511	-	-	-	ko00000,ko00001,ko01000,ko04131	-	GH38	-	Alpha-mann_mid,Glyco_hydro_38,Glyco_hydro_38C	operon0361					c2	Threonate_Erythronate		3.87995	3.90284	3.87636	1.12983e-08	4.58997e-08	3.67749e-117	TRUE	0.354898	0.027533	0.00337999	0.174337	0.937517	0.990563	FALSE	13.23
agat-gene-574	paeni_NIB01_000620	662145	662999	-		protein_coding					aldo/keto reductase		2,5-diketo-D-gluconic acid reductase	dkgB	-	-	-	-	-	-	-	-	-	-	-	Aldo_ket_red	operon0362								1.86094	1.82268	1.78586	1.45649e-06	6.1638e-06	8.53043e-21	TRUE	-0.438535	-0.433014	-0.438939	0.00103333	0.00722123	0.00053646	FALSE	42.0431
agat-pseudogene-4	paeni_NIB01_000621	663170	664205	-		pseudogene					mechanosensitive ion channel family protein	frameshifted															operon0363								-0.318425	-0.384468	-0.372785	0.452401	0.330946	0.231982	FALSE	NA	NA	NA	NA	NA	NA	#VALUE!	6.63004
agat-gene-577	paeni_NIB01_000624	666881	667711	+		protein_coding					carbohydrate ABC transporter permease		ABC-type sugar transport system, permease component	-	-	-	ko:K10119	ko02010,map02010	M00196	-	-	ko00000,ko00001,ko00002,ko02000	3.A.1.1.28	-	-	BPD_transp_1	operon0364	operon0126							2.23503	2.25725	2.20656	2.18886e-05	2.48072e-05	6.89929e-16	TRUE	NA	NA	NA	NA	NA	NA	#VALUE!	9.15563
agat-gene-575	paeni_NIB01_000622	664583	665935	+		protein_coding					extracellular solute-binding protein		Bacterial extracellular solute-binding protein	-	-	-	ko:K10117	ko02010,map02010	M00196	-	-	ko00000,ko00001,ko00002,ko02000	3.A.1.1.28	-	-	SBP_bac_1,SBP_bac_8	operon0364	operon0126							6.32604	6.26246	6.23583	1.93205e-08	8.5039e-08	3.08877e-110	TRUE	NA	NA	NA	NA	NA	NA	#VALUE!	4.69001
agat-gene-578	paeni_NIB01_000625	667740	670403	+		protein_coding					glycoside hydrolase family 78 protein		Alpha-L-rhamnosidase	ramA	-	3.2.1.40	ko:K05989	-	-	-	-	ko00000,ko01000	-	-	-	Bac_rhamnosid,Bac_rhamnosid6H,Bac_rhamnosid_C,Bac_rhamnosid_N	operon0364	operon0126							3.35199	3.33841	3.30581	1.76937e-07	6.01626e-07	3.79451e-44	TRUE	-0.0194522	-0.267615	-0.221879	0.950881	0.38211	0.385333	FALSE	13.3969
agat-gene-576	paeni_NIB01_000623	666018	666884	+		protein_coding					sugar ABC transporter permease		PFAM binding-protein-dependent transport systems inner membrane component	-	-	-	ko:K02025,ko:K05814,ko:K10118,ko:K10121,ko:K10189,ko:K10241,ko:K15771,ko:K17235	ko02010,map02010	M00196,M00197,M00198,M00199,M00206,M00207,M00491,M00602	-	-	ko00000,ko00001,ko00002,ko02000	3.A.1.1,3.A.1.1.16,3.A.1.1.2,3.A.1.1.20,3.A.1.1.23,3.A.1.1.28,3.A.1.1.3,3.A.1.1.34,3.A.1.1.4	-	-	BPD_transp_1	operon0364	operon0126							3.56496	3.54428	3.50871	3.31565e-07	5.41523e-07	2.09581e-49	TRUE	NA	NA	NA	NA	NA	NA	#VALUE!	5.13055
agat-gene-579	paeni_NIB01_000626	670530	672446	+		protein_coding					hypothetical protein		Right handed beta helix region	-	-	-	-	-	-	-	-	-	-	-	-	Beta_helix,DUF1565	operon0365								3.44045	3.47735	3.4473	1.94564e-07	5.27953e-07	9.637e-46	TRUE	0.160138	0.152585	0.10988	0.358243	0.446289	0.596618	FALSE	16.7899
agat-gene-580	paeni_NIB01_000627	672721	674229	+		protein_coding					RICIN domain-containing protein		Ricin-type beta-trefoil	rafA	-	3.2.1.22	ko:K07407	ko00052,ko00561,ko00600,ko00603,map00052,map00561,map00600,map00603	-	R01101,R01103,R01104,R01194,R01329,R02926,R03634,R04019,R04470,R05549,R05961,R06091	RC00049,RC00059,RC00451	ko00000,ko00001,ko01000	-	-	-	BNR_2,Glyco_hydro_36C,Glyco_hydro_36N,Melibiase,RicinB_lectin_2,Ricin_B_lectin	operon0366								4.36238	4.41976	4.38243	1.87076e-07	5.10393e-07	7.87599e-52	TRUE	0.244278	-0.00221403	-0.0190843	0.388676	0.994434	0.948076	FALSE	21.5839
agat-gene-583	paeni_NIB01_000630	677769	679067	+		protein_coding					extracellular solute-binding protein		ABC transporter substrate-binding protein	msmE	-	-	ko:K10117	ko02010,map02010	M00196	-	-	ko00000,ko00001,ko00002,ko02000	3.A.1.1.28	-	-	SBP_bac_1,SBP_bac_8	operon0367	operon0127							0.111305	0.169073	0.153864	0.554712	0.398016	0.466881	FALSE	-0.34112	-0.241513	-0.238798	0.0406925	0.212542	0.197572	FALSE	42.8038
agat-gene-582	paeni_NIB01_000629	676248	677744	+		protein_coding			phosphorelay signal transduction system|0000160||IEA	GO:0000160	response regulator		Response regulator containing CheY-like receiver domain and AraC-type DNA-binding domain	-	-	-	ko:K07720	ko02020,map02020	M00519	-	-	ko00000,ko00001,ko00002,ko02022	-	-	-	HTH_18,HTH_AraC,Response_reg	operon0367	operon0127							0.376065	0.435436	0.410791	0.0986001	0.0825292	0.0892606	FALSE	-0.421118	-0.347969	-0.33083	0.0188864	0.115941	0.0894845	FALSE	46.2488
agat-gene-581	paeni_NIB01_000628	674417	676267	+		protein_coding					sensor histidine kinase		Histidine kinase	-	-	2.7.13.3	ko:K07718	ko02020,map02020	M00519	-	-	ko00000,ko00001,ko00002,ko01000,ko01001,ko02022	-	-	-	HAMP,HATPase_c,His_kinase,dCache_1	operon0367	operon0127							0.10386	0.100543	0.0895952	0.527579	0.533908	0.626295	FALSE	0.182381	0.234038	0.194119	0.137156	0.121793	0.178348	FALSE	78.559
agat-gene-584	paeni_NIB01_000631	679158	679778	-		protein_coding					polysaccharide deacetylase family protein		Polysaccharide deacetylase	-	-	3.5.1.104	ko:K22278	-	-	-	-	ko00000,ko01000	-	-	-	Polysacc_deac_1	operon0368								-0.437047	-0.368442	-0.362442	0.0460784	0.0798488	0.0461609	FALSE	-0.312614	-0.147655	-0.141527	0.164205	0.553402	0.546495	FALSE	36.4009
agat-gene-585	paeni_NIB01_000632	679959	680834	-		protein_coding					carbohydrate ABC transporter permease		COG0395 ABC-type sugar transport system, permease component	-	-	-	ko:K10119	ko02010,map02010	M00196	-	-	ko00000,ko00001,ko00002,ko02000	3.A.1.1.28	-	-	BPD_transp_1	operon0369	operon0128							0.70712	0.741234	0.692782	0.0139579	0.0109659	0.00420202	FALSE	-1.50276	-1.57816	-1.51852	4.0243e-05	0.000144434	2.17648e-07	TRUE	2.2164
agat-gene-587	paeni_NIB01_000634	681861	683174	-		protein_coding					extracellular solute-binding protein		Bacterial extracellular solute-binding protein	-	-	-	ko:K10117	ko02010,map02010	M00196	-	-	ko00000,ko00001,ko00002,ko02000	3.A.1.1.28	-	-	SBP_bac_1,SBP_bac_8	operon0369	operon0128							2.96943	3.08181	3.03983	9.7774e-07	1.34686e-06	2.375e-40	TRUE	-0.753485	-0.92601	-0.837784	0.0021742	0.00797465	0.00126705	FALSE	2.50918
agat-gene-588	paeni_NIB01_000635	683289	684875	-		protein_coding			phosphorelay signal transduction system|0000160||IEA	GO:0000160	response regulator		COG4753 Response regulator containing CheY-like receiver domain and AraC-type DNA-binding domain	-	-	-	ko:K07720	ko02020,map02020	M00519	-	-	ko00000,ko00001,ko00002,ko02022	-	-	-	HTH_18,HTH_AraC,Response_reg	operon0369	operon0128							2.17793	2.10758	2.06841	1.32466e-05	3.67836e-06	7.61327e-25	TRUE	NA	NA	NA	NA	NA	NA	#VALUE!	2.52286
agat-gene-589	paeni_NIB01_000636	684863	686698	-		protein_coding					sensor histidine kinase		Histidine kinase	-	-	2.7.13.3	ko:K07718	ko02020,map02020	M00519	-	-	ko00000,ko00001,ko00002,ko01000,ko01001,ko02022	-	-	-	HATPase_c,His_kinase,dCache_1	operon0369	operon0128							2.02005	1.91288	1.86945	4.61595e-05	1.89641e-05	5.00703e-18	TRUE	NA	NA	NA	NA	NA	NA	#VALUE!	3.62285
agat-gene-586	paeni_NIB01_000633	680850	681719	-		protein_coding					sugar ABC transporter permease		ABC transporter permease	-	-	-	ko:K10118,ko:K15771	ko02010,map02010	M00196,M00491	-	-	ko00000,ko00001,ko00002,ko02000	3.A.1.1.16,3.A.1.1.2,3.A.1.1.28	-	-	BPD_transp_1	operon0369	operon0128							1.99588	1.87619	1.81312	6.70936e-05	0.000128221	6.17264e-13	TRUE	-1.02963	-0.938428	-0.717944	0.00452123	0.0435322	0.0276319	FALSE	1.21218
agat-gene-590	paeni_NIB01_000637	686841	687095	+		protein_coding					hypothetical protein		Putative nucleotide-binding of sugar-metabolising enzyme	-	-	2.7.1.219,2.7.1.220	ko:K22129	-	-	-	-	ko00000,ko01000	-	-	-	DUF1357_C,DUF1537	operon0370	operon0129							0.793411	0.730549	0.628964	0.031499	0.0577927	0.0825085	FALSE	NA	NA	NA	NA	NA	NA	#VALUE!	0.757953
agat-gene-591	paeni_NIB01_000638	687141	688871	+		protein_coding		sulfuric ester hydrolase activity|0008484||IEA		GO:0008484	sulfatase-like hydrolase/transferase		Sulfatase	-	-	3.1.6.6	ko:K01133	-	-	-	-	ko00000,ko01000	-	-	-	Sulfatase	operon0370	operon0129							1.23516	1.12165	1.09063	3.70233e-05	0.000132599	1.04321e-11	TRUE	0.450165	0.62666	0.505169	0.0636427	0.0284267	0.039863	FALSE	15.1864
agat-gene-592	paeni_NIB01_000639	689133	689987	-		protein_coding					aldo/keto reductase		2,5-diketo-D-gluconic acid reductase	dkgB	-	-	-	-	-	-	-	-	-	-	-	Aldo_ket_red	operon0371								2.85314	2.82049	2.78774	1.92922e-07	1.14158e-06	3.38283e-35	TRUE	-0.124061	-0.0557893	-0.0755121	0.292471	0.731824	0.626765	FALSE	21.5538
agat-gene-593	paeni_NIB01_000640	690159	691409	-		protein_coding					glycosyl transferase		Glycosyl transferases, related to UDP-glucuronosyltransferase	yojK	GO:0003674,GO:0003824,GO:0005575,GO:0005622,GO:0005623,GO:0008194,GO:0016740,GO:0016757,GO:0043226,GO:0043227,GO:0043229,GO:0043231,GO:0044424,GO:0044464	-	-	-	-	-	-	-	-	-	-	UDPGT	operon0371								1.34413	1.30619	1.27885	0.000763175	0.00032703	1.33588e-08	TRUE	0.377624	0.332722	0.258775	0.0683683	0.172082	0.236581	FALSE	5.23726
agat-gene-594	paeni_NIB01_000641	691635	692888	-		protein_coding					mechanosensitive ion channel family protein		Mechanosensitive ion channel	ybdG	GO:0003674,GO:0005215,GO:0005488,GO:0005515,GO:0005575,GO:0005623,GO:0005886,GO:0006810,GO:0006950,GO:0006970,GO:0008150,GO:0008381,GO:0009628,GO:0009987,GO:0015267,GO:0016020,GO:0022803,GO:0022836,GO:0022857,GO:0033554,GO:0042802,GO:0044464,GO:0050896,GO:0051179,GO:0051234,GO:0051716,GO:0055085,GO:0071214,GO:0071470,GO:0071944,GO:0104004	-	ko:K16053	-	-	-	-	ko00000,ko02000	1.A.23.4.5	-	-	MS_channel	operon0372								-0.158049	-0.306838	-0.301752	0.573173	0.209091	0.212436	FALSE	0.947782	1.00921	0.930738	0.000117256	0.000419799	2.20204e-06	FALSE	45.5921
agat-gene-595	paeni_NIB01_000642	693280	694002	+		protein_coding					hypothetical protein		-	-	-	-	-	-	-	-	-	-	-	-	-	-	operon0373								0.944952	0.801751	0.733508	0.0311746	0.0426295	0.0139872	FALSE	NA	NA	NA	NA	NA	NA	#VALUE!	1.88531
agat-gene-596	paeni_NIB01_000643	694092	694712	-		protein_coding					polysaccharide deacetylase family protein		Polysaccharide deacetylase	-	-	3.5.1.104	ko:K22278	-	-	-	-	ko00000,ko01000	-	-	-	Polysacc_deac_1	operon0374								0.342258	0.325542	0.304347	0.011965	0.0381575	0.0172522	FALSE	0.352211	0.602535	0.507705	0.0321742	0.0226228	0.0161154	FALSE	118.014
agat-gene-597	paeni_NIB01_000644	695135	695908	-		protein_coding		transposase activity|0004803||IEA		GO:0004803	IS3 family transposase		Transposase and inactivated derivatives	-	-	-	ko:K07497	-	-	-	-	ko00000	-	-	-	HTH_21,rve	operon0375	operon0130							1.32536	1.40346	1.37999	1.77014e-05	1.07994e-05	2.68573e-21	TRUE	NA	NA	NA	NA	NA	NA	#VALUE!	56.0748
agat-gene-598	paeni_NIB01_000645	695896	696222	-		protein_coding					transposase		Helix-turn-helix domain	-	-	-	-	-	-	-	-	-	-	-	-	HTH_28	operon0375	operon0130							0.11119	0.213004	NA	0.850513	0.727092	NA	#VALUE!	NA	NA	NA	NA	NA	NA	#VALUE!	0.7087
agat-gene-599	paeni_NIB01_000646	696354	696782	-		protein_coding					hypothetical protein		-	-	-	-	-	-	-	-	-	-	-	-	-	-	operon0376								-0.698246	-0.8156	-0.806253	0.00554643	0.00239163	3.88611e-05	FALSE	1.3596	1.48938	1.40762	1.22899e-05	8.69927e-05	5.06081e-10	TRUE	154.379
agat-gene-600	paeni_NIB01_000647	696877	697632	-		protein_coding					hypothetical protein		-	-	-	-	-	-	-	-	-	-	-	-	-	-	operon0377								-3.42666	-3.29109	-3.26385	7.50304e-06	1.24576e-06	1.48907e-38	TRUE	-0.122554	-0.155694	-0.134182	0.606792	0.612674	0.596618	FALSE	230.013
agat-gene-601	paeni_NIB01_000648	698053	698889	-		protein_coding					DUF3800 domain-containing protein		Protein of unknown function (DUF3800)	-	-	-	-	-	-	-	-	-	-	-	-	DUF3800	operon0378								-0.149108	-0.0326691	-0.0381472	0.476243	0.91129	0.876448	FALSE	0.875996	0.895051	0.830763	1.98497e-05	0.000251731	5.05167e-07	FALSE	101.692
agat-gene-602	paeni_NIB01_000649	699379	700125	+		protein_coding					hypothetical protein		-	-	-	-	-	-	-	-	-	-	-	-	-	-	operon0379								-0.124447	-0.121048	-0.123914	0.683373	0.664353	0.638567	FALSE	NA	NA	NA	NA	NA	NA	#VALUE!	23.0423
agat-gene-603	paeni_NIB01_000650	700384	700806	+		protein_coding					stress protein		-	-	-	-	-	-	-	-	-	-	-	-	-	-	operon0380								-0.0614669	-0.18945	-0.186459	0.807338	0.43931	0.44545	FALSE	0.990405	0.935511	0.875585	2.32743e-06	0.000175319	2.64586e-08	FALSE	117.885
agat-gene-604	paeni_NIB01_000651	700944	701102	+		protein_coding					hypothetical protein		transposase activity	-	-	-	-	-	-	-	-	-	-	-	-	HTH_21,rve	operon0381								0.623858	0.528455	0.515297	0.0110931	0.0206272	0.00243364	FALSE	1.16112	1.27252	1.19756	8.48481e-06	0.000106132	3.14249e-09	TRUE	18.4727
agat-gene-606	paeni_NIB01_000653	702232	702429	-		protein_coding					hypothetical protein		-	-	-	-	-	-	-	-	-	-	-	-	-	-	operon0382	operon0131							1.34662	1.32473	1.26551	6.5747e-05	6.35045e-05	9.55027e-14	TRUE	NA	NA	NA	NA	NA	NA	#VALUE!	4.29872
agat-gene-605	paeni_NIB01_000652	701664	702239	-		protein_coding		kinase activity|0016301||IEA		GO:0016301	zeta toxin family protein		Protein conserved in bacteria	-	-	-	-	-	-	-	-	-	-	-	-	AAA_33,Zeta_toxin	operon0382	operon0131							-0.222112	-0.24801	-0.236809	0.239646	0.235283	0.12953	FALSE	1.22509	1.16859	1.06274	5.60945e-05	0.000858582	1.95786e-05	TRUE	35.2462
agat-gene-607	paeni_NIB01_000655	703524	704006	-	smpB	protein_coding					SsrA-binding protein SmpB		the 2 termini fold to resemble tRNA(Ala) and it encodes a tag peptide , a short internal open reading frame. During trans-translation Ala- aminoacylated tmRNA acts like a tRNA, entering the A-site of stalled ribosomes, displacing the stalled mRNA. The ribosome then switches to translate the ORF on the tmRNA	smpB	GO:0003674,GO:0003676,GO:0003723,GO:0005488,GO:0005575,GO:0005622,GO:0005623,GO:0005737,GO:0005829,GO:0006464,GO:0006807,GO:0008150,GO:0008152,GO:0009987,GO:0019538,GO:0036211,GO:0043170,GO:0043412,GO:0044237,GO:0044238,GO:0044260,GO:0044267,GO:0044424,GO:0044444,GO:0044464,GO:0070930,GO:0071704,GO:0097159,GO:1901363,GO:1901564	-	ko:K03664	-	-	-	-	ko00000	-	-	-	SmpB	operon0383								0.747915	0.69388	0.671652	0.000222452	0.00137583	3.03323e-05	FALSE	0.336999	0.377724	0.340027	0.00315631	0.00864372	0.000821832	FALSE	260.284
gene-paeni_NIB01_000654	paeni_NIB01_000654	702519	702883	-	ssrA	tmRNA																					operon0383	operon0131							#N/A	#N/A	#N/A	#N/A	#N/A	#N/A	#N/A	NA	NA	NA	NA	NA	NA	#VALUE!	NA
agat-gene-608	paeni_NIB01_000656	704186	706963	-	rnr	protein_coding		ribonuclease R activity|0008997||IEA	RNA catabolic process|0006401||IEA	GO:0006401, GO:0008997	ribonuclease R		3'-5' exoribonuclease that releases 5'-nucleoside monophosphates and is involved in maturation of structured RNAs	rnr	-	-	ko:K12573,ko:K12585	ko03018,map03018	M00391	-	-	ko00000,ko00001,ko00002,ko01000,ko03016,ko03019	-	-	-	OB_RNB,RNB,S1	operon0384								-1.12543	-1.18848	-1.19026	3.35558e-06	5.23125e-06	2.48641e-27	TRUE	-0.83309	-0.911257	-0.901862	2.96335e-05	0.000255937	3.59819e-08	FALSE	584.193
agat-gene-611	paeni_NIB01_000659	709393	710937	-	gpmI	protein_coding		2,3-bisphosphoglycerate-independent phosphoglycerate mutase activity|0046537||IEA	glycolytic process|0006096||IEA	GO:0006096, GO:0046537	2,3-bisphosphoglycerate-independent phosphoglycerate mutase		Catalyzes the interconversion of 2-phosphoglycerate and 3-phosphoglycerate	gpmI	GO:0003674,GO:0003824,GO:0004619,GO:0005488,GO:0005575,GO:0005622,GO:0005623,GO:0005737,GO:0005829,GO:0005975,GO:0006082,GO:0006090,GO:0006091,GO:0006096,GO:0006139,GO:0006163,GO:0006164,GO:0006165,GO:0006725,GO:0006732,GO:0006733,GO:0006753,GO:0006754,GO:0006757,GO:0006793,GO:0006796,GO:0006807,GO:0006950,GO:0006979,GO:0008150,GO:0008152,GO:0009056,GO:0009058,GO:0009108,GO:0009117,GO:0009123,GO:…	5.4.2.12	ko:K15633	ko00010,ko00260,ko00680,ko01100,ko01110,ko01120,ko01130,ko01200,ko01230,map00010,map00260,map00680,map01100,map01110,map01120,map01130,map01200,map01230	M00001,M00002,M00003	R01518	RC00536	ko00000,ko00001,ko00002,ko01000	-	-	iECSE_1348.ECSE_3895,iJN678.yibO,iJN746.PP_5056	Metalloenzyme,Phosphodiest,iPGM_N	operon0385	operon0132							-2.22334	-2.2229	-2.21486	3.91107e-07	8.14285e-07	4.63607e-41	TRUE	-0.63953	-0.533313	-0.538786	1.71301e-05	0.00248825	8.48736e-06	FALSE	3125.55
agat-gene-613	paeni_NIB01_000661	711723	712904	-		protein_coding					phosphoglycerate kinase		Belongs to the phosphoglycerate kinase family	pgk	GO:0001871,GO:0002020,GO:0003674,GO:0003824,GO:0004618,GO:0005488,GO:0005515,GO:0005575,GO:0005576,GO:0005618,GO:0005622,GO:0005623,GO:0005737,GO:0005829,GO:0005886,GO:0005975,GO:0006082,GO:0006090,GO:0006091,GO:0006096,GO:0006139,GO:0006163,GO:0006164,GO:0006165,GO:0006725,GO:0006732,GO:0006733,GO:0006753,GO:0006754,GO:0006757,GO:0006793,GO:0006796,GO:0006807,GO:0008150,GO:0008152,GO:0009056,GO:…	2.7.2.3,5.3.1.1	ko:K00927,ko:K01803	ko00010,ko00051,ko00562,ko00710,ko01100,ko01110,ko01120,ko01130,ko01200,ko01230,map00010,map00051,map00562,map00710,map01100,map01110,map01120,map01130,map01200,map01230	M00001,M00002,M00003,M00165,M00166,M00308,M00552	R01015,R01512	RC00002,RC00043,RC00423	ko00000,ko00001,ko00002,ko01000,ko04147	-	-	iSB619.SA_RS04145,iSbBS512_1146.SbBS512_E3351	PGK	operon0385	operon0132							-2.03165	-2.01494	-1.99498	3.30942e-07	8.10935e-07	1.22478e-42	TRUE	-0.701661	-0.574736	-0.57858	1.86237e-05	0.00180475	4.50514e-06	FALSE	1886.4
agat-gene-610	paeni_NIB01_000658	707863	709149	-	eno	protein_coding		phosphopyruvate hydratase activity|0004634||IEA	glycolytic process|0006096||IEA	GO:0006096, GO:0004634	phosphopyruvate hydratase		Catalyzes the reversible conversion of 2- phosphoglycerate into phosphoenolpyruvate. It is essential for the degradation of carbohydrates via glycolysis	eno	GO:0001968,GO:0003674,GO:0003824,GO:0004634,GO:0005488,GO:0005515,GO:0005518,GO:0005575,GO:0005576,GO:0005618,GO:0005622,GO:0005623,GO:0005737,GO:0005975,GO:0006082,GO:0006090,GO:0006091,GO:0006096,GO:0006139,GO:0006163,GO:0006164,GO:0006165,GO:0006725,GO:0006732,GO:0006733,GO:0006753,GO:0006754,GO:0006757,GO:0006793,GO:0006796,GO:0006807,GO:0008150,GO:0008152,GO:0009056,GO:0009058,GO:0009108,GO:…	4.2.1.11	ko:K01689	ko00010,ko00680,ko01100,ko01110,ko01120,ko01130,ko01200,ko01230,ko03018,ko04066,map00010,map00680,map01100,map01110,map01120,map01130,map01200,map01230,map03018,map04066	M00001,M00002,M00003,M00346,M00394	R00658	RC00349	ko00000,ko00001,ko00002,ko01000,ko03019,ko04147	-	-	-	Enolase_C,Enolase_N	operon0385								-1.86522	-1.84812	-1.82446	1.53625e-06	3.01243e-06	4.77556e-27	TRUE	-0.638262	-0.611719	-0.6251	5.73774e-06	0.00043929	1.1205e-11	FALSE	3190.5
agat-gene-609	paeni_NIB01_000657	707413	707646	-	secG	protein_coding	integral component of plasma membrane|0005887||IEA	protein-transporting ATPase activity|0015450||IEA	protein transport by the Sec complex|0043952||IEA	GO:0043952, GO:0015450, GO:0005887	preprotein translocase subunit SecG		Preprotein translocase subunit SecG	secG	GO:0003674,GO:0005215,GO:0005575,GO:0005623,GO:0005886,GO:0006605,GO:0006612,GO:0006613,GO:0006614,GO:0006616,GO:0006810,GO:0006886,GO:0008104,GO:0008150,GO:0008320,GO:0008565,GO:0009987,GO:0015031,GO:0015833,GO:0016020,GO:0016043,GO:0022857,GO:0022884,GO:0031522,GO:0032978,GO:0032991,GO:0033036,GO:0033365,GO:0034613,GO:0042886,GO:0042887,GO:0043952,GO:0044464,GO:0045047,GO:0045184,GO:0046907,GO:…	-	ko:K03075	ko02024,ko03060,ko03070,map02024,map03060,map03070	M00335	-	-	ko00000,ko00001,ko00002,ko02044	3.A.5.1,3.A.5.2	-	-	SecG	operon0385								-1.79951	-1.7167	-1.67653	4.92612e-06	5.27898e-05	6.16392e-13	TRUE	-0.0128793	0.13687	0.0948633	0.939456	0.537224	0.649851	FALSE	1127.78
agat-gene-612	paeni_NIB01_000660	710937	711689	-	tpiA	protein_coding		triose-phosphate isomerase activity|0004807||IEA	glycolytic process|0006096||IEA	GO:0006096, GO:0004807	triose-phosphate isomerase		Involved in the gluconeogenesis. Catalyzes stereospecifically the conversion of dihydroxyacetone phosphate (DHAP) to D-glyceraldehyde-3-phosphate (G3P)	tpiA	GO:0003674,GO:0003824,GO:0004807,GO:0005575,GO:0005622,GO:0005623,GO:0005737,GO:0005829,GO:0005975,GO:0005996,GO:0006006,GO:0006066,GO:0006071,GO:0006081,GO:0006082,GO:0006090,GO:0006091,GO:0006094,GO:0006096,GO:0006139,GO:0006163,GO:0006164,GO:0006165,GO:0006725,GO:0006732,GO:0006733,GO:0006753,GO:0006754,GO:0006757,GO:0006793,GO:0006796,GO:0006807,GO:0008150,GO:0008152,GO:0009056,GO:0009058,GO:…	2.7.2.3,5.3.1.1	ko:K00927,ko:K01803	ko00010,ko00051,ko00562,ko00710,ko01100,ko01110,ko01120,ko01130,ko01200,ko01230,map00010,map00051,map00562,map00710,map01100,map01110,map01120,map01130,map01200,map01230	M00001,M00002,M00003,M00165,M00166,M00308,M00552	R01015,R01512	RC00002,RC00043,RC00423	ko00000,ko00001,ko00002,ko01000,ko04147	-	-	iHN637.CLJU_RS19265	TIM	operon0385	operon0132							-1.69747	-1.70442	-1.68778	1.55036e-06	3.05761e-06	6.54207e-29	TRUE	-0.810112	-0.685955	-0.691072	3.05923e-06	0.000586809	4.03011e-08	FALSE	1091.89
agat-gene-614	paeni_NIB01_000662	713054	714061	-	gap	protein_coding			gluconeogenesis|0006094||IEA, glycolytic process|0006096||IEA, glyceraldehyde-3-phosphate metabolic process|0019682||IEA	GO:0006094, GO:0006096, GO:0019682	type I glyceraldehyde-3-phosphate dehydrogenase		Belongs to the glyceraldehyde-3-phosphate dehydrogenase family	gap	GO:0000166,GO:0001871,GO:0002020,GO:0003674,GO:0003824,GO:0004365,GO:0005488,GO:0005515,GO:0005575,GO:0005622,GO:0005623,GO:0005737,GO:0006139,GO:0006725,GO:0006732,GO:0006733,GO:0006734,GO:0006735,GO:0006753,GO:0006793,GO:0006796,GO:0006807,GO:0008150,GO:0008152,GO:0009117,GO:0009986,GO:0009987,GO:0016491,GO:0016620,GO:0016903,GO:0019362,GO:0019637,GO:0019674,GO:0019899,GO:0022610,GO:0030246,GO:…	1.2.1.12	ko:K00134	ko00010,ko00710,ko01100,ko01110,ko01120,ko01130,ko01200,ko01230,ko04066,ko05010,map00010,map00710,map01100,map01110,map01120,map01130,map01200,map01230,map04066,map05010	M00001,M00002,M00003,M00165,M00166,M00308,M00552	R01061	RC00149	ko00000,ko00001,ko00002,ko01000,ko04131,ko04147	-	-	-	Gp_dh_C,Gp_dh_N	operon0385	operon0133							-2.16924	-2.19293	-2.18835	2.22559e-07	7.11817e-07	1.24818e-44	TRUE	-1.01468	-0.958703	-0.960985	2.65543e-07	8.26225e-05	1.23121e-13	FALSE	3254.54
agat-gene-615	paeni_NIB01_000663	714169	715194	-		protein_coding					hypothetical protein		Central glycolytic genes regulator	cggR	-	-	ko:K05311	-	-	-	-	ko00000,ko03000	-	-	-	Sugar-bind	operon0386	operon0133							-1.74498	-1.74325	-1.72917	4.59665e-07	1.00318e-06	1.96356e-44	TRUE	-0.880409	-0.796293	-0.795736	2.89505e-06	0.000398663	3.48915e-08	FALSE	1252.48
gene-paeni_NIB01_000664	paeni_NIB01_000664	715677	715751	+		tRNA																					operon0387								#N/A	#N/A	#N/A	#N/A	#N/A	#N/A	#N/A	NA	NA	NA	NA	NA	NA	#VALUE!	NA
agat-gene-616	paeni_NIB01_000665	715946	716527	+	clpP	protein_coding	endopeptidase Clp complex|0009368||IEA	ATP-dependent peptidase activity|0004176||IEA, serine-type endopeptidase activity|0004252||IEA	proteolysis|0006508||IEA	GO:0006508, GO:0004176, GO:0004252, GO:0009368	ATP-dependent Clp endopeptidase proteolytic subunit ClpP		Cleaves peptides in various proteins in a process that requires ATP hydrolysis. Has a chymotrypsin-like activity. Plays a major role in the degradation of misfolded proteins	clpP	GO:0003674,GO:0003824,GO:0004176,GO:0005488,GO:0005515,GO:0006355,GO:0006508,GO:0006515,GO:0006807,GO:0008150,GO:0008152,GO:0008233,GO:0009056,GO:0009057,GO:0009889,GO:0009890,GO:0009892,GO:0009987,GO:0010468,GO:0010556,GO:0010558,GO:0010605,GO:0010629,GO:0016462,GO:0016787,GO:0016817,GO:0016818,GO:0016887,GO:0017111,GO:0019219,GO:0019222,GO:0019538,GO:0030163,GO:0031323,GO:0031324,GO:0031326,GO:…	3.4.21.92	ko:K01358	ko04112,ko04212,map04112,map04212	-	-	-	ko00000,ko00001,ko01000,ko01002	-	-	-	CLP_protease	operon0388								1.68195	1.58133	1.48936	0.000367276	0.00176838	2.46439e-05	TRUE	1.1248	1.22235	1.14662	1.4873e-06	0.000196295	5.58966e-09	TRUE	226.259
agat-gene-617	paeni_NIB01_000666	716926	718023	-		protein_coding					DUF4163 domain-containing protein		Domain of unknown function (DUF4163)	M1-323	-	-	-	-	-	-	-	-	-	-	-	Cu_amine_oxidN1,DUF3298,DUF4163	operon0389								5.4025	5.42289	5.40461	3.66444e-09	2.44597e-08	1.00461e-180	TRUE	-0.0797354	0.0713117	0.0375928	0.614257	0.763033	0.872172	FALSE	57.3801
agat-gene-618	paeni_NIB01_000667	718395	719150	-		protein_coding					SIMPL domain-containing protein	The SIMPL domain is named for its presence in mouse protein SIMPL (signalling molecule that associates with mouse pelle-like kinase). Bacterial member BP26, from Brucella, was shown to assemble into a channel-like structure, while YggE from E. coli has been associated with resistance to oxidative stress.	Protein of unknown function (DUF541)	bp26	-	-	ko:K09807	-	-	-	-	ko00000	-	-	-	SIMPL	operon0390								7.30848	7.40662	7.38925	3.18454e-09	2.18589e-08	4.63097e-226	TRUE	0.0618889	-0.0176281	-0.0385953	0.709138	0.93073	0.851612	FALSE	24.0575
agat-gene-620	paeni_NIB01_000669	719828	720766	-	whiA	protein_coding		DNA binding|0003677||IEA	regulation of sporulation|0043937||IEA	GO:0043937, GO:0003677	DNA-binding protein WhiA		May be required for sporulation	whiA	GO:0005575,GO:0005618,GO:0005623,GO:0005886,GO:0008150,GO:0016020,GO:0030312,GO:0043937,GO:0044464,GO:0050789,GO:0050793,GO:0065007,GO:0071944	-	ko:K09762	-	-	-	-	ko00000	-	-	-	HTH_WhiA,LAGLIDADG_WhiA,WhiA_N	operon0391	operon0134							-2.14565	-2.08929	-2.06965	2.967e-07	1.4241e-06	5.49929e-35	TRUE	-0.954776	-0.851488	-0.846589	2.98884e-06	0.000290847	1.07198e-08	FALSE	381.609
agat-gene-619	paeni_NIB01_000668	719298	719567	-		protein_coding					HPr family phosphocarrier protein		PTS sugar transporter subunit IIA	crh	-	-	ko:K11184,ko:K11189	-	-	-	-	ko00000,ko02000	4.A.2.1	-	-	PTS-HPr	operon0391								-0.985055	-0.952368	-0.940022	2.04882e-05	0.000177879	1.3525e-09	FALSE	-0.0668475	-0.0949655	-0.111463	0.621993	0.55682	0.480641	FALSE	947.14
agat-gene-622	paeni_NIB01_000671	721773	722672	-	rapZ	protein_coding		ATP binding|0005524||IEA		GO:0005524	RNase adapter RapZ		Displays ATPase and GTPase activities	rapZ	GO:0003674,GO:0003676,GO:0003723,GO:0005488,GO:0005515,GO:0005575,GO:0005623,GO:0005886,GO:0006139,GO:0006396,GO:0006725,GO:0006807,GO:0008150,GO:0008152,GO:0009987,GO:0010467,GO:0016020,GO:0016070,GO:0034641,GO:0042802,GO:0043170,GO:0044237,GO:0044238,GO:0044464,GO:0046483,GO:0071704,GO:0071944,GO:0090304,GO:0097159,GO:1901360,GO:1901363	-	ko:K06958	-	-	-	-	ko00000,ko03019	-	-	-	ATP_bind_2	operon0391	operon0134							-1.20736	-1.19009	-1.19345	1.78021e-06	6.38309e-06	5.54808e-25	TRUE	-0.714992	-0.61834	-0.602911	6.57288e-05	0.00496194	0.000352384	FALSE	380.432
agat-gene-621	paeni_NIB01_000670	720773	721759	-		protein_coding					YvcK family protein		Required for morphogenesis under gluconeogenic growth conditions	ybhK	-	-	-	-	-	-	-	-	-	-	-	UPF0052	operon0391	operon0134							-2.07859	-2.03941	-2.03374	1.70512e-07	7.64975e-07	3.98988e-44	TRUE	-0.868311	-0.870497	-0.878188	1.28691e-06	6.73997e-05	5.91027e-15	FALSE	412.551
agat-gene-623	paeni_NIB01_000672	722724	723674	-		protein_coding		glucokinase activity|0004340||IEA	glycolytic process|0006096||IEA	GO:0006096, GO:0004340	ROK family glucokinase		Glucokinase	glk	-	2.7.1.2	ko:K00845	ko00010,ko00052,ko00500,ko00520,ko00521,ko00524,ko01100,ko01110,ko01120,ko01130,ko01200,map00010,map00052,map00500,map00520,map00521,map00524,map01100,map01110,map01120,map01130,map01200	M00001,M00549	R00299,R01600,R01786	RC00002,RC00017	ko00000,ko00001,ko00002,ko01000	-	-	-	ROK	operon0392	operon0134							-1.32636	-1.33953	-1.33632	7.07317e-07	3.19057e-06	1.00991e-32	TRUE	-0.545952	-0.477316	-0.469789	0.00136105	0.0133613	0.00309688	FALSE	553.711
agat-gene-624	paeni_NIB01_000673	724169	725104	-		protein_coding					AI-2E family transporter		AI-2E family transporter	ydbI	GO:0003674,GO:0005215,GO:0005575,GO:0005623,GO:0005886,GO:0005887,GO:0006810,GO:0008150,GO:0016020,GO:0016021,GO:0031224,GO:0031226,GO:0044425,GO:0044459,GO:0044464,GO:0051179,GO:0051234,GO:0055085,GO:0071944	-	-	-	-	-	-	-	-	-	-	AI-2E_transport	operon0393								-0.161868	-0.187763	-0.188301	0.24892	0.296888	0.314447	FALSE	-0.435992	-0.295551	-0.281228	0.0169632	0.184994	0.154449	FALSE	175.333
agat-gene-625	paeni_NIB01_000674	725361	726320	-	trxB	protein_coding		thioredoxin-disulfide reductase activity|0004791||IEA		GO:0004791	thioredoxin-disulfide reductase		Belongs to the class-II pyridine nucleotide-disulfide oxidoreductase family	trxB	-	1.8.1.9	ko:K00384	ko00450,map00450	-	R02016,R03596,R09372	RC00013,RC02518,RC02873	ko00000,ko00001,ko01000	-	-	-	Pyr_redox_2	operon0394								-0.195006	-0.141486	-0.14141	0.0998636	0.29089	0.288143	FALSE	-0.46281	-0.479526	-0.481294	0.000678421	0.00521926	0.000273437	FALSE	387.667
agat-gene-626	paeni_NIB01_000675	726492	728225	-		protein_coding					tetratricopeptide repeat protein		fOG TPR repeat	yvcD	-	-	-	-	-	-	-	-	-	-	-	HTH_psq,TPR_16,TPR_19,TPR_2,TPR_8	operon0395								-1.39861	-1.36523	-1.36587	7.86073e-07	4.03689e-06	3.0459e-35	TRUE	-0.24607	-0.257754	-0.268464	0.0262607	0.0704044	0.033653	FALSE	521.923
agat-gene-629	paeni_NIB01_000678	731214	732113	-		protein_coding	membrane|0016020||IEA			GO:0016020	ABC transporter permease subunit		Sugar ABC transporter ATPase	-	-	-	ko:K17319	ko02010,map02010	M00603	-	-	ko00000,ko00001,ko00002,ko02000	3.A.1.1.29,3.A.1.1.9	-	-	BPD_transp_1	operon0396	operon0135							4.87569	5.33614	5.26464	7.14815e-06	1.02689e-05	1.45797e-28	TRUE	NA	NA	NA	NA	NA	NA	#VALUE!	4.49573
agat-gene-628	paeni_NIB01_000677	730271	731143	-		protein_coding					carbohydrate ABC transporter permease		binding-protein-dependent transport systems inner membrane component	-	-	-	ko:K02026,ko:K17320	ko02010,map02010	M00207,M00603	-	-	ko00000,ko00001,ko00002,ko02000	3.A.1.1,3.A.1.1.29,3.A.1.1.9	-	-	BPD_transp_1	operon0396	operon0135							2.92197	3.38019	3.28742	0.000112851	0.000100969	4.19644e-13	TRUE	NA	NA	NA	NA	NA	NA	#VALUE!	12.4419
agat-gene-627	paeni_NIB01_000676	728420	730174	-		protein_coding					hypothetical protein		-	-	-	-	-	-	-	-	-	-	-	-	-	-	operon0396	operon0135							2.1069	2.52115	2.4039	0.000846602	0.000538385	4.94454e-08	TRUE	0.0329161	-0.0826877	-0.0907795	0.870598	0.71877	0.678128	FALSE	39.9608
agat-gene-630	paeni_NIB01_000679	732254	733840	-		protein_coding					extracellular solute-binding protein		ABC transporter substrate-binding protein	-	-	-	ko:K17318	ko02010,map02010	M00603	-	-	ko00000,ko00001,ko00002,ko02000	3.A.1.1.29,3.A.1.1.9	-	-	SBP_bac_1,SBP_bac_8	operon0397	operon0135							5.80181	6.32546	6.26111	6.29427e-06	6.53773e-06	4.26085e-36	TRUE	0.455247	0.364572	0.250308	0.0938211	0.202406	0.35015	FALSE	7.087
agat-gene-631	paeni_NIB01_000680	734175	736454	-		protein_coding			regulation of transcription, DNA-templated|0006355||IEA	GO:0006355	helix-turn-helix domain-containing protein		COG2207 AraC-type DNA-binding domain-containing proteins	-	-	-	-	-	-	-	-	-	-	-	-	HTH_18,dCache_1	operon0398								2.0766	2.06036	2.04015	4.11244e-08	1.37313e-07	1.88448e-101	TRUE	0.215141	0.27302	0.223987	0.151138	0.125209	0.19248	FALSE	32.3813
agat-gene-636	paeni_NIB01_000685	740319	741053	-	hisA	protein_coding		1-(5-phosphoribosyl)-5-[(5-phosphoribosylamino)methylideneamino]imidazole-4-carboxamide isomerase activity|0003949||IEA	histidine biosynthetic process|0000105||IEA	GO:0000105, GO:0003949	1-(5-phosphoribosyl)-5-[(5-phosphoribosylamino)methylideneamino]imidazole-4-carboxamide isomerase		1-(5-phosphoribosyl)-5- (5-phosphoribosylamino)methylideneamino imidazole-4-carboxamide isomerase	hisA	GO:0000105,GO:0000162,GO:0003674,GO:0003824,GO:0003949,GO:0005575,GO:0005622,GO:0005623,GO:0005737,GO:0006082,GO:0006520,GO:0006547,GO:0006568,GO:0006576,GO:0006586,GO:0006725,GO:0006807,GO:0008150,GO:0008152,GO:0008652,GO:0009058,GO:0009072,GO:0009073,GO:0009308,GO:0009309,GO:0009987,GO:0016053,GO:0016853,GO:0016860,GO:0016861,GO:0018130,GO:0019438,GO:0019752,GO:0034641,GO:0042401,GO:0042430,GO:…	5.3.1.16	ko:K01814	ko00340,ko01100,ko01110,ko01230,map00340,map01100,map01110,map01230	M00026	R04640	RC00945	ko00000,ko00001,ko00002,ko01000	-	-	-	His_biosynth	operon0399								-0.903271	-1.10852	-1.08194	0.00738577	0.0012425	3.86174e-06	FALSE	0.322612	0.433888	0.310767	0.132668	0.196564	0.22541	FALSE	71.7675
agat-gene-640	paeni_NIB01_000689	744058	744717	-	hisG	protein_coding		ATP phosphoribosyltransferase activity|0003879||IEA	histidine biosynthetic process|0000105||IEA	GO:0000105, GO:0003879	ATP phosphoribosyltransferase		Catalyzes the condensation of ATP and 5-phosphoribose 1- diphosphate to form N'-(5'-phosphoribosyl)-ATP (PR-ATP). Has a crucial role in the pathway because the rate of histidine biosynthesis seems to be controlled primarily by regulation of HisG enzymatic activity	hisG	GO:0000105,GO:0003674,GO:0003824,GO:0003879,GO:0006082,GO:0006520,GO:0006547,GO:0006725,GO:0006807,GO:0008150,GO:0008152,GO:0008652,GO:0009058,GO:0009987,GO:0016053,GO:0016740,GO:0016757,GO:0016763,GO:0018130,GO:0019438,GO:0019752,GO:0034641,GO:0043436,GO:0044237,GO:0044238,GO:0044249,GO:0044281,GO:0044283,GO:0046394,GO:0046483,GO:0052803,GO:0071704,GO:1901360,GO:1901362,GO:1901564,GO:1901566,GO:…	2.4.2.17	ko:K00765,ko:K02502	ko00340,ko01100,ko01110,ko01230,map00340,map01100,map01110,map01230	M00026	R01071	RC02819,RC03200	ko00000,ko00001,ko00002,ko01000	-	-	-	HisG	operon0399	operon0137							-0.0614864	-0.255783	-0.255232	0.839411	0.307059	0.298234	FALSE	0.566786	0.497467	0.41343	0.00321235	0.0373433	0.0415844	FALSE	28.9117
agat-gene-634	paeni_NIB01_000683	738605	739333	-	hisIE	protein_coding		phosphoribosyl-AMP cyclohydrolase activity|0004635||IEA, phosphoribosyl-ATP diphosphatase activity|0004636||IEA	histidine biosynthetic process|0000105||IEA	GO:0000105, GO:0004635, GO:0004636	bifunctional phosphoribosyl-AMP cyclohydrolase/phosphoribosyl-ATP diphosphatase HisIE		Histidine biosynthesis bifunctional protein HisIE	hisE	GO:0000105,GO:0000287,GO:0003674,GO:0003824,GO:0004636,GO:0005488,GO:0005575,GO:0005618,GO:0005623,GO:0006082,GO:0006520,GO:0006547,GO:0006725,GO:0006807,GO:0008150,GO:0008152,GO:0008652,GO:0009058,GO:0009605,GO:0009607,GO:0009987,GO:0016053,GO:0016462,GO:0016787,GO:0016817,GO:0016818,GO:0018130,GO:0019438,GO:0019752,GO:0030312,GO:0034641,GO:0040007,GO:0043167,GO:0043169,GO:0043207,GO:0043436,GO:…	3.5.4.19,3.6.1.31,5.3.1.16	ko:K01496,ko:K01523,ko:K01814,ko:K11755	ko00340,ko01100,ko01110,ko01230,map00340,map01100,map01110,map01230	M00026	R04035,R04037,R04640	RC00002,RC00945,RC01055	ko00000,ko00001,ko00002,ko01000	-	-	iAF987.Gmet_1897,iHN637.CLJU_RS05760,iSB619.SA_RS14110,iYO844.BSU34860	PRA-CH,PRA-PH	operon0399	operon0136							-0.460299	-0.501969	-0.506835	0.0337278	0.0202918	0.00625706	FALSE	0.41451	0.60265	0.500051	0.012297	0.0285219	0.0227994	FALSE	48.208
agat-gene-639	paeni_NIB01_000688	742646	743950	-	hisD	protein_coding		histidinol dehydrogenase activity|0004399||IEA	histidine biosynthetic process|0000105||IEA	GO:0000105, GO:0004399	histidinol dehydrogenase		Catalyzes the sequential NAD-dependent oxidations of L- histidinol to L-histidinaldehyde and then to L-histidine	hisD	GO:0000105,GO:0003674,GO:0003824,GO:0004399,GO:0005488,GO:0005575,GO:0005622,GO:0005623,GO:0005737,GO:0005829,GO:0006082,GO:0006520,GO:0006547,GO:0006725,GO:0006807,GO:0008150,GO:0008152,GO:0008652,GO:0009058,GO:0009987,GO:0016053,GO:0016491,GO:0016614,GO:0016616,GO:0018130,GO:0019438,GO:0019752,GO:0030145,GO:0034641,GO:0043167,GO:0043169,GO:0043436,GO:0044237,GO:0044238,GO:0044249,GO:0044281,GO:…	1.1.1.23,1.1.1.308	ko:K00013,ko:K15509	ko00340,ko01100,ko01110,ko01230,map00340,map01100,map01110,map01230	M00026	R01158,R01163,R03012	RC00099,RC00242,RC00463	ko00000,ko00001,ko00002,ko01000	-	-	iSB619.SA_RS14140,iYO844.BSU34910	Histidinol_dh	operon0399	operon0137							0.10183	-0.0663838	-0.0766337	0.661695	0.729395	0.701813	FALSE	0.267243	0.152441	0.112961	0.0662726	0.38424	0.528618	FALSE	43.7561
agat-gene-633	paeni_NIB01_000682	737769	738593	-	hisJ	protein_coding		histidinol-phosphatase activity|0004401||IEA	histidine biosynthetic process|0000105||IEA	GO:0000105, GO:0004401	histidinol-phosphatase HisJ		PHP domain	hisK	-	3.1.3.15	ko:K04486	ko00340,ko01100,ko01110,ko01230,map00340,map01100,map01110,map01230	M00026	R03013	RC00017	ko00000,ko00001,ko00002,ko01000	-	-	-	PHP,PHP_C	operon0399	operon0136							-0.522179	-0.608584	-0.596618	0.0193938	0.0101411	0.00296311	FALSE	0.249812	0.555783	0.429245	0.20596	0.083102	0.0821486	FALSE	88.3604
agat-gene-635	paeni_NIB01_000684	739326	740087	-	hisF	protein_coding		imidazoleglycerol-phosphate synthase activity|0000107||IEA	histidine biosynthetic process|0000105||IEA	GO:0000105, GO:0000107	imidazole glycerol phosphate synthase subunit HisF		IGPS catalyzes the conversion of PRFAR and glutamine to IGP, AICAR and glutamate. The HisF subunit catalyzes the cyclization activity that produces IGP and AICAR from PRFAR using the ammonia provided by the HisH subunit	hisF	GO:0000107,GO:0003674,GO:0003824,GO:0016740,GO:0016757,GO:0016763	-	ko:K02500	ko00340,ko01100,ko01110,ko01230,map00340,map01100,map01110,map01230	M00026	R04558	RC00010,RC01190,RC01943	ko00000,ko00001,ko00002,ko01000	-	-	iHN637.CLJU_RS05755,iSB619.SA_RS14115	His_biosynth	operon0399	operon0136							-0.801954	-0.796987	-0.759503	0.0077592	0.0139236	0.00462245	FALSE	0.347184	0.387161	0.266322	0.187844	0.277929	0.317135	FALSE	83.5636
agat-gene-637	paeni_NIB01_000686	741400	742020	-	hisH	protein_coding		imidazoleglycerol-phosphate synthase activity|0000107||IEA, carbon-nitrogen ligase activity, with glutamine as amido-N-donor|0016884||IEA	histidine biosynthetic process|0000105||IEA	GO:0000105, GO:0000107, GO:0016884	imidazole glycerol phosphate synthase subunit HisH		IGPS catalyzes the conversion of PRFAR and glutamine to IGP, AICAR and glutamate. The HisH subunit provides the glutamine amidotransferase activity that produces the ammonia necessary to HisF for the synthesis of IGP and AICAR	hisH	GO:0000105,GO:0000107,GO:0003674,GO:0003824,GO:0006082,GO:0006520,GO:0006547,GO:0006725,GO:0006807,GO:0008150,GO:0008152,GO:0008652,GO:0009058,GO:0009987,GO:0016053,GO:0016740,GO:0016757,GO:0016763,GO:0018130,GO:0019438,GO:0019752,GO:0034641,GO:0043436,GO:0044237,GO:0044238,GO:0044249,GO:0044281,GO:0044283,GO:0046394,GO:0046483,GO:0052803,GO:0071704,GO:1901360,GO:1901362,GO:1901564,GO:1901566,GO:…	-	ko:K02501	ko00340,ko01100,ko01110,ko01230,map00340,map01100,map01110,map01230	M00026	R04558	RC00010,RC01190,RC01943	ko00000,ko00001,ko00002,ko01000	-	-	-	GATase	operon0399	operon0137							-0.260115	-0.436236	-0.434796	0.306892	0.0467985	0.0333293	FALSE	0.407774	0.456548	0.340774	0.0631556	0.142562	0.166647	FALSE	40.6805
agat-gene-638	paeni_NIB01_000687	742024	742653	-	hisB	protein_coding		imidazoleglycerol-phosphate dehydratase activity|0004424||IEA	histidine biosynthetic process|0000105||IEA	GO:0000105, GO:0004424	imidazoleglycerol-phosphate dehydratase HisB		imidazoleglycerol-phosphate dehydratase	hisB	GO:0000105,GO:0003674,GO:0003824,GO:0004401,GO:0004424,GO:0005488,GO:0005515,GO:0006082,GO:0006520,GO:0006547,GO:0006725,GO:0006793,GO:0006796,GO:0006807,GO:0008150,GO:0008152,GO:0008652,GO:0009058,GO:0009987,GO:0016053,GO:0016311,GO:0016787,GO:0016788,GO:0016791,GO:0016829,GO:0016835,GO:0016836,GO:0018130,GO:0019438,GO:0019752,GO:0034641,GO:0040007,GO:0042578,GO:0042802,GO:0043436,GO:0044237,GO:…	1.1.1.23,2.6.1.9,3.1.3.15,4.2.1.19	ko:K00013,ko:K00817,ko:K01089,ko:K01693	ko00340,ko00350,ko00360,ko00400,ko00401,ko00960,ko01100,ko01110,ko01130,ko01230,map00340,map00350,map00360,map00400,map00401,map00960,map01100,map01110,map01130,map01230	M00026	R00694,R00734,R01158,R01163,R03012,R03013,R03243,R03457	RC00006,RC00017,RC00099,RC00242,RC00463,RC00888,RC00932	ko00000,ko00001,ko00002,ko01000,ko01007	-	-	iECO111_1330.ECO111_2746,iECS88_1305.ECS88_2121,iJN746.PP_0289,iLJ478.TM1039,iSB619.SA_RS14130,iUMNK88_1353.UMNK88_2570	Hydrolase_like,IGPD,PNK3P	operon0399	operon0137							-0.30874	-0.481563	-0.482392	0.252182	0.0375654	0.0227154	FALSE	0.250983	0.317894	0.262508	0.0735172	0.0866075	0.125817	FALSE	26.3642
agat-gene-632	paeni_NIB01_000681	736685	737632	-		protein_coding					ribose-phosphate pyrophosphokinase		Involved in the biosynthesis of the central metabolite phospho-alpha-D-ribosyl-1-pyrophosphate (PRPP) via the transfer of pyrophosphoryl group from ATP to 1-hydroxyl of ribose-5-phosphate (Rib-5-P)	prs	-	2.7.6.1	ko:K00948	ko00030,ko00230,ko01100,ko01110,ko01120,ko01130,ko01200,ko01230,map00030,map00230,map01100,map01110,map01120,map01130,map01200,map01230	M00005	R01049	RC00002,RC00078	ko00000,ko00001,ko00002,ko01000	-	-	-	Pribosyl_synth,Pribosyltran,Pribosyltran_N	operon0399								0.251839	0.207768	0.197929	0.0326569	0.153863	0.166338	FALSE	-0.445516	-0.331082	-0.338238	0.000692223	0.0412002	0.0137239	FALSE	253.988
agat-gene-642	paeni_NIB01_000691	746412	746933	-		protein_coding					acyltransferase		Acetyltransferase	yvoF	-	2.3.1.79	ko:K00661	-	-	-	-	ko00000,ko01000	-	-	-	Hexapep,Hexapep_2	operon0400	operon0138							-1.33883	-1.36567	-1.36347	4.41776e-06	3.52245e-06	3.04647e-35	TRUE	0.198001	0.570433	0.416073	0.390187	0.112398	0.116451	FALSE	124.564
agat-gene-641	paeni_NIB01_000690	744719	745912	-		protein_coding			histidine biosynthetic process|0000105||IEA	GO:0000105	ATP phosphoribosyltransferase regulatory subunit		Required for the first step of histidine biosynthesis. May allow the feedback regulation of ATP phosphoribosyltransferase activity by histidine	hisZ	-	2.4.2.17,6.1.1.21	ko:K00765,ko:K01892,ko:K02502	ko00340,ko00970,ko01100,ko01110,ko01230,map00340,map00970,map01100,map01110,map01230	M00026,M00359,M00360	R01071,R03655	RC00055,RC00523,RC02819,RC03200	ko00000,ko00001,ko00002,ko01000,ko01007,ko03016	-	-	-	tRNA-synt_His	operon0400	operon0137							-0.269811	-0.479397	-0.466012	0.396528	0.0934973	0.0663735	FALSE	0.451356	0.585616	0.499986	0.0153704	0.0168256	0.0120963	FALSE	46.2461
agat-gene-644	paeni_NIB01_000693	747587	748624	-	lgt	protein_coding	integral component of membrane|0016021||IEA	phosphatidylglycerol-prolipoprotein diacylglyceryl transferase activity|0008961||IEA	protein lipoylation|0009249||IEA	GO:0009249, GO:0008961, GO:0016021	prolipoprotein diacylglyceryl transferase		Transfers the N-acyl diglyceride group on what will become the N-terminal cysteine of membrane lipoproteins	lgt	GO:0003674,GO:0003824,GO:0005575,GO:0005623,GO:0005886,GO:0005887,GO:0006464,GO:0006807,GO:0008150,GO:0008152,GO:0008961,GO:0009058,GO:0009059,GO:0009249,GO:0009898,GO:0009987,GO:0010467,GO:0016020,GO:0016021,GO:0016740,GO:0016757,GO:0018065,GO:0018193,GO:0018205,GO:0019538,GO:0031224,GO:0031226,GO:0034645,GO:0036211,GO:0040007,GO:0042157,GO:0042158,GO:0043170,GO:0043412,GO:0044237,GO:0044238,GO:…	2.1.1.199	ko:K03438,ko:K13292	-	-	-	-	ko00000,ko01000,ko03009	-	-	-	LGT	operon0400	operon0138							-0.594911	-0.600312	-0.594749	0.00403542	0.00978822	0.00165989	FALSE	0.463705	0.851385	0.685242	0.0417872	0.029255	0.0139927	FALSE	147.522
agat-gene-643	paeni_NIB01_000692	746930	747580	-	ppaX	protein_coding					pyrophosphatase PpaX		Pyrophosphatase	ppaX	GO:0003674,GO:0003824,GO:0005575,GO:0005622,GO:0005623,GO:0005737,GO:0005829,GO:0006139,GO:0006259,GO:0006281,GO:0006725,GO:0006793,GO:0006796,GO:0006807,GO:0006950,GO:0006974,GO:0008150,GO:0008152,GO:0008967,GO:0009987,GO:0016311,GO:0016787,GO:0016788,GO:0016791,GO:0033554,GO:0034641,GO:0042578,GO:0043170,GO:0044237,GO:0044238,GO:0044260,GO:0044424,GO:0044444,GO:0044464,GO:0046483,GO:0050896,GO:…	3.1.3.18,3.6.1.1	ko:K01091,ko:K06019,ko:K13292	ko00190,ko00630,ko01100,ko01110,ko01130,map00190,map00630,map01100,map01110,map01130	-	R01334	RC00017	ko00000,ko00001,ko01000	-	-	-	HAD_2	operon0400	operon0138							-0.826098	-0.813034	-0.815829	0.000322497	0.000815766	4.57744e-07	FALSE	0.323914	0.624379	0.446177	0.216113	0.110808	0.110661	FALSE	84.743
agat-gene-645	paeni_NIB01_000694	748751	749689	-	hprK	protein_coding		protein serine/threonine kinase activity|0004674||IEA, phosphatase activity|0016791||IEA	phosphoenolpyruvate-dependent sugar phosphotransferase system|0009401||IEA	GO:0009401, GO:0004674, GO:0016791	HPr(Ser) kinase/phosphatase		Catalyzes the ATP- as well as the pyrophosphate- dependent phosphorylation of a specific serine residue in HPr, a phosphocarrier protein of the phosphoenolpyruvate-dependent sugar phosphotransferase system (PTS). HprK P also catalyzes the pyrophosphate-producing, inorganic phosphate-dependent dephosphorylation (phosphorolysis) of seryl-phosphorylated HPr (P- Ser-HPr). The two antagonistic activit…	hprK	GO:0005575,GO:0005622,GO:0005623,GO:0005737,GO:0005829,GO:0044424,GO:0044444,GO:0044464	-	ko:K06023	-	-	-	-	ko00000,ko01000	-	-	-	Hpr_kinase_C,Hpr_kinase_N	operon0401	operon0138							-0.28553	-0.266961	-0.269134	0.0714723	0.161046	0.14432	FALSE	0.584336	0.746585	0.641224	0.00273283	0.0105709	0.00388743	FALSE	164.966
agat-gene-646	paeni_NIB01_000695	749952	751076	-	ugpC	protein_coding		ATP binding|0005524||IEA, ABC-type transporter activity|0140359||IEA		GO:0005524, GO:0140359	sn-glycerol-3-phosphate ABC transporter ATP-binding protein UgpC		Belongs to the ABC transporter superfamily	msmX	-	-	ko:K10112	ko02010,map02010	M00194,M00196,M00197,M00200,M00201,M00206,M00207,M00491,M00602,M00605,M00606	-	-	ko00000,ko00001,ko00002,ko02000	3.A.1.1	-	-	ABC_tran,TOBE,TOBE_2	operon0401								3.89292	3.88625	3.8643	5.3683e-08	1.4144e-07	3.21535e-69	TRUE	-0.19727	-0.1645	-0.179926	0.0634929	0.242322	0.149227	FALSE	371.879
agat-gene-647	paeni_NIB01_000696	751180	752376	-		protein_coding					helix-turn-helix domain-containing protein		polyketide synthase	lrp	-	-	ko:K02647,ko:K17319	ko02010,map02010	M00603	-	-	ko00000,ko00001,ko00002,ko02000,ko03000	3.A.1.1.29,3.A.1.1.9	-	-	HTH_30	operon0402								1.30279	1.29823	1.27442	2.07372e-06	7.6649e-06	8.01467e-27	TRUE	0.821978	0.972832	0.914988	6.58492e-06	0.000144434	2.00006e-09	FALSE	71.6471
gene-paeni_NIB01_000697	paeni_NIB01_000697	752541	752613	-		tRNA																					operon0402	operon0139							#N/A	#N/A	#N/A	#N/A	#N/A	#N/A	#N/A	NA	NA	NA	NA	NA	NA	#VALUE!	NA
gene-paeni_NIB01_000698	paeni_NIB01_000698	752621	752706	-		tRNA																					operon0402	operon0139							#N/A	#N/A	#N/A	#N/A	#N/A	#N/A	#N/A	NA	NA	NA	NA	NA	NA	#VALUE!	NA
gene-paeni_NIB01_000699	paeni_NIB01_000699	752716	752791	-		tRNA																					operon0402	operon0140							#N/A	#N/A	#N/A	#N/A	#N/A	#N/A	#N/A	NA	NA	NA	NA	NA	NA	#VALUE!	NA
gene-paeni_NIB01_000700	paeni_NIB01_000700	752812	752889	-		tRNA																					operon0402	operon0140							#N/A	#N/A	#N/A	#N/A	#N/A	#N/A	#N/A	NA	NA	NA	NA	NA	NA	#VALUE!	NA
gene-paeni_NIB01_000701	paeni_NIB01_000701	752899	752974	-		tRNA																					operon0402								#N/A	#N/A	#N/A	#N/A	#N/A	#N/A	#N/A	NA	NA	NA	NA	NA	NA	#VALUE!	NA
gene-paeni_NIB01_000702	paeni_NIB01_000702	752980	753055	-		tRNA																					operon0402	operon0141							#N/A	#N/A	#N/A	#N/A	#N/A	#N/A	#N/A	NA	NA	NA	NA	NA	NA	#VALUE!	NA
gene-paeni_NIB01_000703	paeni_NIB01_000703	753065	753141	-		tRNA																					operon0402	operon0141							#N/A	#N/A	#N/A	#N/A	#N/A	#N/A	#N/A	NA	NA	NA	NA	NA	NA	#VALUE!	NA
gene-paeni_NIB01_000704	paeni_NIB01_000704	753189	753280	-		tRNA																					operon0402	operon0141							#N/A	#N/A	#N/A	#N/A	#N/A	#N/A	#N/A	NA	NA	NA	NA	NA	NA	#VALUE!	NA
gene-paeni_NIB01_000705	paeni_NIB01_000705	753367	756414	-		rRNA																					operon0402	operon0141							#N/A	#N/A	#N/A	#N/A	#N/A	#N/A	#N/A	NA	NA	NA	NA	NA	NA	#VALUE!	NA
gene-paeni_NIB01_000706	paeni_NIB01_000706	756662	756737	-		tRNA																					operon0402	operon0142							#N/A	#N/A	#N/A	#N/A	#N/A	#N/A	#N/A	NA	NA	NA	NA	NA	NA	#VALUE!	NA
gene-paeni_NIB01_000707	paeni_NIB01_000707	756828	756904	-		tRNA																					operon0402	operon0142							#N/A	#N/A	#N/A	#N/A	#N/A	#N/A	#N/A	NA	NA	NA	NA	NA	NA	#VALUE!	NA
gene-paeni_NIB01_000708	paeni_NIB01_000708	756942	757058	-	rrf	rRNA																					operon0402	operon0142							#N/A	#N/A	#N/A	#N/A	#N/A	#N/A	#N/A	NA	NA	NA	NA	NA	NA	#VALUE!	NA
agat-gene-648	paeni_NIB01_000710	759076	759345	-		protein_coding					pro-sigmaK processing inhibitor BofA family protein		Pro-sigmaK processing inhibitor BofA	M1-298	-	-	ko:K06317	-	-	-	-	ko00000	-	-	-	BofA	operon0403	operon0143							2.72425	2.70545	2.63384	1.23494e-05	2.04644e-05	1.35169e-22	TRUE	NA	NA	NA	NA	NA	NA	#VALUE!	0.954966
gene-paeni_NIB01_000709	paeni_NIB01_000709	757164	758716	-		rRNA																					operon0403	operon0142							#N/A	#N/A	#N/A	#N/A	#N/A	#N/A	#N/A	NA	NA	NA	NA	NA	NA	#VALUE!	NA
agat-gene-650	paeni_NIB01_000712	759957	760556	-	recR	protein_coding			DNA repair|0006281||IEA, DNA recombination|0006310||IEA	GO:0006281, GO:0006310	recombination mediator RecR		May play a role in DNA repair. It seems to be involved in an RecBC-independent recombinational process of DNA repair. It may act with RecF and RecO	recR	GO:0000731,GO:0006139,GO:0006259,GO:0006281,GO:0006302,GO:0006310,GO:0006725,GO:0006807,GO:0006950,GO:0006974,GO:0008150,GO:0008152,GO:0009058,GO:0009059,GO:0009314,GO:0009411,GO:0009416,GO:0009628,GO:0009987,GO:0018130,GO:0019438,GO:0033554,GO:0034641,GO:0034645,GO:0034654,GO:0043170,GO:0044237,GO:0044238,GO:0044249,GO:0044260,GO:0044271,GO:0046483,GO:0050896,GO:0051716,GO:0071704,GO:0071897,GO:…	-	ko:K06187	ko03440,map03440	-	-	-	ko00000,ko00001,ko03400	-	-	-	HHH,RecR,Toprim_4	operon0404	operon0144							-0.0853165	-0.0698888	-0.0800343	0.395513	0.586023	0.532324	FALSE	-0.692706	-0.504785	-0.483835	0.000201397	0.0247999	0.00870175	FALSE	460.789
agat-gene-649	paeni_NIB01_000711	759382	759657	-		protein_coding					YaaL family protein		-	M1-297	-	-	-	-	-	-	-	-	-	-	-	DUF2508	operon0404	operon0143							-1.13942	-0.945091	NA	0.0512313	0.111652	NA	#VALUE!	NA	NA	NA	NA	NA	NA	#VALUE!	1.49675
agat-gene-651	paeni_NIB01_000713	760591	760902	-		protein_coding	cytoplasm|0005737||IEA	DNA binding|0003677||IEA	biological_process|0008150||IEA	GO:0008150, GO:0003677, GO:0005737	YbaB/EbfC family nucleoid-associated protein		Binds to DNA and alters its conformation. May be involved in regulation of gene expression, nucleoid organization and DNA protection	yaaK	-	-	ko:K09747	-	-	-	-	ko00000	-	-	-	YbaB_DNA_bd	operon0404	operon0144							0.0952892	0.115218	0.102951	0.332727	0.354932	0.38905	FALSE	-0.445948	-0.324282	-0.323306	0.00421201	0.0657471	0.0377567	FALSE	250.072
agat-gene-652	paeni_NIB01_000714	760951	762711	-	dnaX	protein_coding	DNA polymerase III complex|0009360||IEA	DNA binding|0003677||IEA, DNA-directed DNA polymerase activity|0003887||IEA, ATP binding|0005524||IEA	DNA replication|0006260||IEA	GO:0006260, GO:0003677, GO:0003887, GO:0005524, GO:0009360	DNA polymerase III subunit gamma/tau		DNA polymerase III is a complex, multichain enzyme responsible for most of the replicative synthesis in bacteria. This DNA polymerase also exhibits 3' to 5' exonuclease activity	dnaX	GO:0006139,GO:0006259,GO:0006260,GO:0006261,GO:0006725,GO:0006807,GO:0008150,GO:0008152,GO:0009058,GO:0009059,GO:0009987,GO:0034641,GO:0034645,GO:0043170,GO:0044237,GO:0044238,GO:0044249,GO:0044260,GO:0046483,GO:0071704,GO:0090304,GO:1901360,GO:1901576	2.7.7.7	ko:K02343	ko00230,ko00240,ko01100,ko03030,ko03430,ko03440,map00230,map00240,map01100,map03030,map03430,map03440	M00260	R00375,R00376,R00377,R00378	RC02795	ko00000,ko00001,ko00002,ko01000,ko03032,ko03400	-	-	-	DNA_pol3_delta2,DNA_pol3_gamma3	operon0405	operon0144							-0.624217	-0.601368	-0.606566	2.41441e-05	0.000259225	8.46562e-13	FALSE	-0.27893	-0.1961	-0.21893	0.00995609	0.152909	0.0687242	FALSE	1073.46
gene-paeni_NIB01_000715	paeni_NIB01_000715	762885	763152	-	ffs	SRP_RNA																					operon0406								#N/A	#N/A	#N/A	#N/A	#N/A	#N/A	#N/A	NA	NA	NA	NA	NA	NA	#VALUE!	NA
agat-gene-653	paeni_NIB01_000716	763302	763499	-	rpmE	protein_coding	ribosome|0005840||IEA	structural constituent of ribosome|0003735||IEA	translation|0006412||IEA	GO:0006412, GO:0003735, GO:0005840	50S ribosomal protein L31		50S ribosomal protein L31	rpmE	-	-	ko:K02909	ko03010,map03010	M00178	-	-	br01610,ko00000,ko00001,ko00002,ko03011	-	-	-	Ribosomal_L31	operon0407	operon0145							-3.46854	-3.54875	-3.52685	1.58342e-07	5.63774e-07	2.85493e-47	TRUE	-0.890237	-0.931812	-0.936122	2.95463e-06	6.43224e-05	1.932e-13	FALSE	1919.4
agat-gene-654	paeni_NIB01_000717	763603	764877	-		protein_coding					radical SAM protein		Radical SAM protein	M1-291	-	-	-	-	-	-	-	-	-	-	-	Radical_SAM	operon0408	operon0145							-0.701585	-0.795248	-0.791799	0.000348672	0.000433699	2.25938e-08	FALSE	0.584125	0.791745	0.674078	0.00217087	0.0123945	0.00444537	FALSE	249.818
agat-gene-655	paeni_NIB01_000718	764976	766301	-	rho	protein_coding		ATP binding|0005524||IEA, ATP-dependent activity, acting on RNA|0008186||IEA	DNA-templated transcription, termination|0006353||IEA	GO:0006353, GO:0005524, GO:0008186	transcription termination factor Rho		Facilitates transcription termination by a mechanism that involves Rho binding to the nascent RNA, activation of Rho's RNA-dependent ATPase activity, and release of the mRNA from the DNA template	rho	-	-	ko:K03628	ko03018,map03018	-	-	-	ko00000,ko00001,ko03019,ko03021	-	-	-	ATP-synt_ab,Rho_N,Rho_RNA_bind	operon0408	operon0145							0.248283	0.147238	0.13387	0.0871573	0.317279	0.357706	FALSE	0.878006	1.0805	0.97478	4.74661e-05	0.00160491	3.08395e-05	FALSE	125.697
agat-gene-656	paeni_NIB01_000719	766771	768024	-		protein_coding		UDP-N-acetylglucosamine 1-carboxyvinyltransferase activity|0008760||IEA	UDP-N-acetylgalactosamine biosynthetic process|0019277||IEA	GO:0019277, GO:0008760	UDP-N-acetylglucosamine 1-carboxyvinyltransferase		Cell wall formation. Adds enolpyruvyl to UDP-N- acetylglucosamine	murA	GO:0000270,GO:0003674,GO:0003824,GO:0005575,GO:0005622,GO:0005623,GO:0005737,GO:0005829,GO:0006022,GO:0006023,GO:0006024,GO:0006807,GO:0008150,GO:0008152,GO:0008760,GO:0009058,GO:0009059,GO:0009252,GO:0009273,GO:0009987,GO:0016740,GO:0016765,GO:0030203,GO:0034645,GO:0042221,GO:0042546,GO:0043170,GO:0044036,GO:0044038,GO:0044085,GO:0044237,GO:0044249,GO:0044260,GO:0044424,GO:0044444,GO:0044464,GO:…	2.5.1.7	ko:K00790	ko00520,ko00550,ko01100,map00520,map00550,map01100	-	R00660	RC00350	ko00000,ko00001,ko01000,ko01011	-	-	iYO844.BSU37100	EPSP_synthase	operon0409								-1.10977	-1.10495	-1.09713	7.95971e-06	3.4506e-05	3.87154e-16	TRUE	-0.683928	-0.694625	-0.69748	2.9246e-05	0.00044113	1.51779e-07	FALSE	284.325
agat-gene-657	paeni_NIB01_000720	768174	769028	-	fba	protein_coding		fructose-bisphosphate aldolase activity|0004332||IEA	glycolytic process|0006096||IEA	GO:0006096, GO:0004332	class II fructose-1,6-bisphosphate aldolase		Catalyzes the formation of glycerone phosphate and glyceraldehyde 3-phosphate from fructose 1,6, bisphosphate	fbaA	-	4.1.2.13	ko:K01624	ko00010,ko00030,ko00051,ko00680,ko00710,ko01100,ko01110,ko01120,ko01130,ko01200,ko01230,map00010,map00030,map00051,map00680,map00710,map01100,map01110,map01120,map01130,map01200,map01230	M00001,M00003,M00165,M00167,M00344,M00345	R01068,R01070,R01829,R02568	RC00438,RC00439,RC00603,RC00604	ko00000,ko00001,ko00002,ko01000	-	-	iSB619.SA_RS11075	F_bP_aldolase	operon0410								-1.9952	-2.05239	-2.03993	4.18574e-07	6.75839e-07	4.60271e-40	TRUE	-0.306638	-0.294566	-0.306514	0.006261	0.0415975	0.0101945	FALSE	2264.37
agat-gene-658	paeni_NIB01_000721	769288	769617	-		protein_coding			phosphorelay signal transduction system|0000160||IEA	GO:0000160	response regulator		CheY-like receiver	spo0F	-	-	ko:K02490	ko02020,ko02024,map02020,map02024	M00485	-	-	ko00000,ko00001,ko00002,ko02022	-	-	-	Response_reg	operon0411								1.14487	1.43015	1.31547	0.0342251	0.00614342	0.000411626	TRUE	0.257644	0.429805	0.34316	0.232412	0.0843961	0.119466	FALSE	17.8707
agat-gene-659	paeni_NIB01_000722	769896	771500	-		protein_coding		CTP synthase activity|0003883||IEA	pyrimidine nucleotide biosynthetic process|0006221||IEA, CTP biosynthetic process|0006241||IEA	GO:0006221, GO:0006241, GO:0003883	CTP synthase		Catalyzes the ATP-dependent amination of UTP to CTP with either L-glutamine or ammonia as the source of nitrogen. Regulates intracellular CTP levels through interactions with the four ribonucleotide triphosphates	pyrG	GO:0005575,GO:0005623,GO:0005886,GO:0008150,GO:0016020,GO:0040007,GO:0044464,GO:0071944	6.3.4.2	ko:K01937	ko00240,ko01100,map00240,map01100	M00052	R00571,R00573	RC00010,RC00074	ko00000,ko00001,ko00002,ko01000	-	-	iHN637.CLJU_RS01075,iNJ661.Rv1699	CTP_synth_N,GATase	operon0412								-4.31179	-4.18746	-4.21284	3.61145e-08	1.74219e-07	8.13982e-74	TRUE	-0.787021	-0.819792	-0.829038	2.01152e-06	8.26225e-05	4.52649e-14	FALSE	1248.97
agat-gene-660	paeni_NIB01_000723	771993	772562	-	rpoE	protein_coding		DNA-directed 5'-3' RNA polymerase activity|0003899||IEA	transcription, DNA-templated|0006351||IEA	GO:0006351, GO:0003899	DNA-directed RNA polymerase subunit delta		Participates in both the initiation and recycling phases of transcription. In the presence of the delta subunit, RNAP displays an increased specificity of transcription, a decreased affinity for nucleic acids, and an increased efficiency of RNA synthesis because of enhanced recycling	rpoE	GO:0003674,GO:0003824,GO:0003899,GO:0006139,GO:0006351,GO:0006725,GO:0006807,GO:0008150,GO:0008152,GO:0009058,GO:0009059,GO:0009987,GO:0010467,GO:0016070,GO:0016740,GO:0016772,GO:0016779,GO:0018130,GO:0019438,GO:0032774,GO:0034062,GO:0034641,GO:0034645,GO:0034654,GO:0043170,GO:0044237,GO:0044238,GO:0044249,GO:0044260,GO:0044271,GO:0046483,GO:0071704,GO:0090304,GO:0097659,GO:0097747,GO:0140098,GO:…	-	ko:K03048	ko00230,ko00240,ko01100,ko03020,map00230,map00240,map01100,map03020	M00183	R00435,R00441,R00442,R00443	RC02795	br01611,ko00000,ko00001,ko00002,ko03021,ko03400	-	-	-	HARE-HTH	operon0413								-1.3042	-1.34049	-1.32938	2.76467e-06	1.06966e-05	1.18395e-22	TRUE	-0.167271	-0.0338517	-0.0548288	0.165151	0.869528	0.778409	FALSE	1638.71
agat-gene-661	paeni_NIB01_000724	773027	774181	+		protein_coding					S8 family peptidase		Peptidase S8	epr	-	3.4.21.62	ko:K01342	ko02024,map02024	-	-	-	ko00000,ko00001,ko01000,ko01002,ko03110	-	-	-	Big_2,Peptidase_S8	operon0413								-2.36453	-2.46324	-2.42542	4.30342e-05	3.07482e-06	1.89375e-17	TRUE	-0.596264	-0.684775	-0.609944	0.0304331	0.0215541	0.0147206	FALSE	17.4302
agat-gene-662	paeni_NIB01_000725	774428	776107	-	argS	protein_coding	cytoplasm|0005737||IEA	arginine-tRNA ligase activity|0004814||IEA	arginyl-tRNA aminoacylation|0006420||IEA	GO:0006420, GO:0004814, GO:0005737	arginine--tRNA ligase		Catalyzes a two-step reaction, first charging an arginine molecule by linking its carboxyl group to the alpha-phosphate of ATP, followed by transfer of the aminoacyl-adenylate to its tRNA	argS	GO:0003674,GO:0003824,GO:0004812,GO:0004814,GO:0005575,GO:0005622,GO:0005623,GO:0005737,GO:0005829,GO:0005886,GO:0006082,GO:0006139,GO:0006399,GO:0006412,GO:0006418,GO:0006420,GO:0006518,GO:0006520,GO:0006725,GO:0006807,GO:0008150,GO:0008152,GO:0009058,GO:0009059,GO:0009987,GO:0010467,GO:0016020,GO:0016070,GO:0016874,GO:0016875,GO:0019538,GO:0019752,GO:0034641,GO:0034645,GO:0034660,GO:0040007,GO:…	6.1.1.19	ko:K01887	ko00970,map00970	M00359,M00360	R03646	RC00055,RC00523	ko00000,ko00001,ko00002,ko01000,ko01007,ko03016,ko03029	-	-	iAF987.Gmet_1434	Arg_tRNA_synt_N,DALR_1,tRNA-synt_1d	operon0414	operon0146							-3.46887	-3.47816	-3.47321	2.70751e-08	8.11106e-08	1.85026e-100	TRUE	-0.317131	-0.307382	-0.317309	0.00856027	0.0377419	0.0124494	FALSE	1120.97
agat-gene-663	paeni_NIB01_000726	776104	776529	-		protein_coding					DUF1934 domain-containing protein		Domain of unknown function (DUF1934)	ywiB	-	-	-	-	-	-	-	-	-	-	-	DUF1934	operon0415	operon0146							-3.7264	-3.73793	-3.72386	1.10876e-07	7.5344e-08	3.96776e-116	TRUE	-0.303663	-0.252324	-0.247508	0.0513606	0.21782	0.190848	FALSE	260.763
agat-gene-664	paeni_NIB01_000727	776795	777016	-		protein_coding					DUF6171 family protein		-	-	-	-	-	-	-	-	-	-	-	-	-	-	operon0416	operon0147							2.38504	2.45875	2.42007	5.72588e-07	5.39933e-07	8.97202e-61	TRUE	NA	NA	NA	NA	NA	NA	#VALUE!	4.15916
agat-gene-665	paeni_NIB01_000728	777093	778574	-		protein_coding					alpha-N-arabinofuranosidase		alpha-N-arabinofuranosidase	abfA	-	3.2.1.55	ko:K01209	ko00520,map00520	-	R01762	-	ko00000,ko00001,ko01000	-	GH51	-	Alpha-L-AF_C	operon0417	operon0147							2.10833	2.17222	2.1529	1.43679e-07	4.04172e-07	5.02008e-59	TRUE	-0.0645729	-0.287966	-0.215241	0.835115	0.40738	0.434063	FALSE	21.8219
agat-gene-666	paeni_NIB01_000729	778791	779978	-		protein_coding					hypothetical protein		protein related to plant photosystem II stability assembly factor	ycf48	-	-	-	-	-	-	-	-	-	-	-	BNR,PSII_BNR	operon0417								6.38553	6.3455	6.32709	3.15401e-09	1.40304e-08	1.03675e-219	TRUE	-1.02619	-1.10585	-1.08091	9.50155e-07	0.00027925	2.64586e-08	TRUE	12.0753
agat-gene-667	paeni_NIB01_000730	781065	781934	-	speB	protein_coding		agmatinase activity|0008783||IEA	spermidine biosynthetic process|0008295||IEA	GO:0008295, GO:0008783	agmatinase		Belongs to the arginase family	speB	GO:0003674,GO:0003824,GO:0005575,GO:0005622,GO:0005623,GO:0005737,GO:0006576,GO:0006595,GO:0006596,GO:0006807,GO:0008150,GO:0008152,GO:0008216,GO:0008295,GO:0009058,GO:0009308,GO:0009309,GO:0009987,GO:0016787,GO:0016810,GO:0016813,GO:0034641,GO:0042401,GO:0044106,GO:0044237,GO:0044249,GO:0044271,GO:0044424,GO:0044464,GO:0071704,GO:0097164,GO:1901564,GO:1901566,GO:1901576	3.5.3.11	ko:K01480	ko00330,ko01100,map00330,map01100	M00133	R01157	RC00024,RC00329	ko00000,ko00001,ko00002,ko01000	-	-	-	Arginase	operon0418	operon0148							-2.31271	-2.30376	-2.30089	1.41663e-07	2.13456e-07	6.5286e-61	TRUE	-0.570737	-0.633711	-0.62467	0.000272293	0.00220777	7.56234e-05	FALSE	446.084
agat-gene-668	paeni_NIB01_000731	781949	782776	-	speE	protein_coding					polyamine aminopropyltransferase		Catalyzes the irreversible transfer of a propylamine group from the amino donor S-adenosylmethioninamine (decarboxy- AdoMet) to putrescine (1,4-diaminobutane) to yield spermidine	speE	GO:0003674,GO:0003824,GO:0004766,GO:0005575,GO:0005622,GO:0005623,GO:0005737,GO:0005829,GO:0006576,GO:0006595,GO:0006596,GO:0006807,GO:0008150,GO:0008152,GO:0008216,GO:0008295,GO:0009058,GO:0009308,GO:0009309,GO:0009987,GO:0016740,GO:0016765,GO:0034641,GO:0042401,GO:0044106,GO:0044237,GO:0044249,GO:0044271,GO:0044424,GO:0044444,GO:0044464,GO:0071704,GO:0097164,GO:1901564,GO:1901566,GO:1901576	2.5.1.16	ko:K00797	ko00270,ko00330,ko00410,ko00480,ko01100,map00270,map00330,map00410,map00480,map01100	M00034,M00133	R01920,R02869,R08359	RC00021,RC00053	ko00000,ko00001,ko00002,ko01000	-	-	iYO844.BSU37500	Spermine_synt_N,Spermine_synth	operon0419	operon0148							-1.0135	-1.04427	-1.04416	2.26556e-05	2.2981e-05	4.47857e-16	TRUE	-0.307134	-0.196636	-0.199593	0.04835	0.302251	0.271069	FALSE	159.46
agat-gene-669	paeni_NIB01_000732	783075	785153	+		protein_coding		penicillin binding|0008658||IEA		GO:0008658	PBP1A family penicillin-binding protein		Carboxypeptidase	pbpG	GO:0005575,GO:0005623,GO:0005886,GO:0016020,GO:0044464,GO:0071944	2.4.1.129,3.4.16.4	ko:K05365,ko:K05366,ko:K21464	ko00550,ko01100,ko01501,map00550,map01100,map01501	-	R04519	RC00005,RC00049	ko00000,ko00001,ko01000,ko01003,ko01011	-	GT51	-	Transgly,Transpeptidase,UB2H	operon0420								-1.87894	-1.98326	-1.96303	2.07002e-05	2.60863e-06	2.0439e-28	TRUE	-0.0701629	-0.188429	-0.180047	0.74832	0.417359	0.406488	FALSE	54.3346
agat-gene-670	paeni_NIB01_000733	785299	785802	-		protein_coding					YwhD family protein		YwhD family	ywhD	-	-	-	-	-	-	-	-	-	-	-	YwhD	operon0420								-1.29815	-1.36141	-1.32667	6.03327e-05	6.67676e-05	1.5625e-11	TRUE	-0.0941432	-0.200888	-0.206685	0.439745	0.215193	0.191041	FALSE	248.212
agat-gene-671	paeni_NIB01_000734	785905	787896	+		protein_coding					M1 family metallopeptidase		EnpEP protein	pepN	-	-	-	-	-	-	-	-	-	-	-	Peptidase_M1	operon0421	operon0149							-1.30178	-1.4662	-1.44328	0.00200614	0.000281034	3.79222e-09	TRUE	NA	NA	NA	NA	NA	NA	#VALUE!	14.0481
agat-gene-672	paeni_NIB01_000735	787907	788749	+		protein_coding					hypothetical protein		-	M1-255	-	-	-	-	-	-	-	-	-	-	-	-	operon0422	operon0149							0.0295216	0.00941547	-0.00125537	0.899817	0.963457	0.995784	FALSE	NA	NA	NA	NA	NA	NA	#VALUE!	7.17729
agat-gene-673	paeni_NIB01_000736	789144	789614	+		protein_coding					C40 family peptidase		Hydrolase	spr1	-	-	ko:K21471	-	-	-	-	ko00000,ko01000,ko01002,ko01011	-	-	-	NLPC_P60,SH3_3	operon0423								1.20486	1.22146	1.20123	4.24394e-05	3.20401e-05	6.38859e-13	TRUE	-0.546635	-0.555967	-0.519545	0.00874607	0.0255462	0.0108384	FALSE	785.453
agat-gene-675	paeni_NIB01_000738	790655	791014	+		protein_coding					cytochrome c		Cytochrome C oxidase, cbb3-type, subunit III	cccB	-	-	ko:K08738,ko:K12263,ko:K13300	ko00920,ko01100,ko01120,ko01524,ko02020,ko04115,ko04210,ko04214,ko04215,ko04932,ko05010,ko05012,ko05014,ko05016,ko05134,ko05145,ko05152,ko05161,ko05164,ko05167,ko05168,ko05200,ko05210,ko05222,ko05416,map00920,map01100,map01120,map01524,map02020,map04115,map04210,map04214,map04215,map04932,map05010,map05012,map05014,map05016,map05134,map05145,map05152,map05161,map05164,map05167,map05168,map05200,m…	M00595	R10151	RC03151,RC03152	ko00000,ko00001,ko00002	3.D.4.6	-	-	Cytochrome_CBB3	operon0424								0.740941	0.781495	0.76096	0.00030697	0.000755029	1.50428e-06	FALSE	-0.115688	-0.147489	-0.151403	0.461791	0.4715	0.440771	FALSE	193.795
agat-gene-674	paeni_NIB01_000737	790010	790504	+		protein_coding					GNAT family N-acetyltransferase		Acetyltransferase (GNAT) family	natSF	-	2.3.1.128	ko:K03789	-	-	-	-	ko00000,ko01000,ko03009	-	-	-	Acetyltransf_1	operon0424								0.211487	0.110902	0.099873	0.336431	0.610863	0.618168	FALSE	0.849419	0.888444	0.812659	9.36915e-05	0.000609098	2.19274e-05	FALSE	28.8925
agat-gene-676	paeni_NIB01_000739	791341	792342	-	rbsK	protein_coding		ribokinase activity|0004747||IEA	D-ribose catabolic process|0019303||IEA	GO:0019303, GO:0004747	ribokinase		Catalyzes the phosphorylation of ribose at O-5 in a reaction requiring ATP and magnesium. The resulting D-ribose-5- phosphate can then be used either for sythesis of nucleotides, histidine, and tryptophan, or as a component of the pentose phosphate pathway	rbsK	GO:0003674,GO:0003824,GO:0004747,GO:0005575,GO:0005622,GO:0005623,GO:0005737,GO:0005829,GO:0005975,GO:0006081,GO:0006098,GO:0006139,GO:0006725,GO:0006732,GO:0006733,GO:0006739,GO:0006753,GO:0006793,GO:0006796,GO:0006807,GO:0008150,GO:0008152,GO:0009117,GO:0009987,GO:0016301,GO:0016310,GO:0016740,GO:0016772,GO:0016773,GO:0019200,GO:0019362,GO:0019637,GO:0019682,GO:0019693,GO:0034641,GO:0044237,GO:…	2.7.1.15	ko:K00852	ko00030,map00030	-	R01051,R02750	RC00002,RC00017	ko00000,ko00001,ko01000	-	-	-	PfkB	operon0425	operon0150							-1.20366	-1.27081	-1.26343	1.65587e-05	2.79022e-05	3.5633e-15	TRUE	-0.538005	-0.762003	-0.719002	0.00761082	0.00532837	0.000654649	FALSE	308.84
agat-gene-677	paeni_NIB01_000740	792373	792669	-		protein_coding		4-alpha-hydroxytetrahydrobiopterin dehydratase activity|0008124||IEA	tetrahydrobiopterin biosynthetic process|0006729||IEA	GO:0006729, GO:0008124	4a-hydroxytetrahydrobiopterin dehydratase		dehydratase	phhB	-	3.5.4.33,4.2.1.96	ko:K01724,ko:K11991	ko00790,map00790	-	R04734,R10223	RC00477,RC01208	ko00000,ko00001,ko01000,ko03016,ko04147	-	-	-	Polyketide_cyc2,Pterin_4a	operon0426	operon0150							-0.920562	-1.07256	-1.06343	0.000803515	0.000242318	7.62741e-09	FALSE	-0.180265	0.079013	0.0390569	0.529507	0.800306	0.890279	FALSE	83.6348
agat-gene-678	paeni_NIB01_000741	792923	793216	-		protein_coding					hypothetical protein		-	M1-250	-	-	-	-	-	-	-	-	-	-	-	-	operon0426								0.302464	0.252723	0.228996	0.0444242	0.122426	0.144641	FALSE	0.152772	0.432284	0.336404	0.45287	0.106024	0.139476	FALSE	48.2354
agat-gene-680	paeni_NIB01_000743	794237	795055	+	motB	protein_coding					flagellar motor protein MotB		Flagellar motor protein	motB	-	-	ko:K02557	ko02030,ko02040,map02030,map02040	-	-	-	ko00000,ko00001,ko02000,ko02035	1.A.30.1	-	-	MotB_plug,OmpA	operon0427	operon0151							-1.59336	-1.4581	-1.44522	9.19305e-05	5.29022e-05	4.7428e-12	TRUE	-0.961962	-1.00169	-0.99255	4.02186e-06	0.000171644	2.20688e-09	FALSE	103.03
agat-gene-679	paeni_NIB01_000742	793450	794250	+	motA	protein_coding					flagellar motor stator protein MotA		With Mot B forms the ion channels that couple flagellar rotation to proton sodium motive force across the membrane and forms the stator elements of the rotary flagellar machine	motA	GO:0001539,GO:0005575,GO:0005623,GO:0005886,GO:0006928,GO:0008150,GO:0009987,GO:0016020,GO:0016021,GO:0031224,GO:0040011,GO:0044425,GO:0044464,GO:0048870,GO:0051179,GO:0051674,GO:0071944,GO:0071973,GO:0071978,GO:0097588	-	ko:K02556	ko02020,ko02030,ko02040,map02020,map02030,map02040	-	-	-	ko00000,ko00001,ko02000,ko02035	1.A.30.1	-	-	MotA_ExbB	operon0427	operon0151							-2.17944	-2.14518	-2.1397	8.75355e-06	8.01899e-07	5.4485e-39	TRUE	-0.776723	-0.708693	-0.698704	5.53934e-05	0.00106631	7.81019e-06	FALSE	97.9155
agat-gene-681	paeni_NIB01_000744	795190	795891	-	rluF	protein_coding		pseudouridine synthase activity|0009982||IEA	pseudouridine synthesis|0001522||IEA	GO:0001522, GO:0009982	23S rRNA pseudouridine(2604) synthase RluF		Belongs to the pseudouridine synthase RsuA family	rluF	-	5.4.99.19,5.4.99.21,5.4.99.22	ko:K06178,ko:K06182,ko:K06183	-	-	-	-	ko00000,ko01000,ko03009	-	-	-	PseudoU_synth_2,S4	operon0428	operon0152							-1.01494	-0.99866	-0.995774	1.25438e-05	2.79943e-05	1.31273e-21	FALSE	0.376877	0.461433	0.400443	0.0106555	0.0174103	0.0148933	FALSE	152.502
agat-gene-682	paeni_NIB01_000745	795910	798249	-		protein_coding					PAS domain S-box protein		Histidine kinase	kinE	-	2.7.13.3	ko:K02491	ko02020,map02020	M00485	-	-	ko00000,ko00001,ko00002,ko01000,ko01001,ko02022	-	-	-	HAMP,HATPase_c,HisKA,PAS,PAS_3,PAS_4,PAS_9,dCache_1	operon0428	operon0152							-1.10143	-0.987146	-0.963082	6.64168e-05	0.000790017	1.1969e-06	FALSE	0.148206	0.159302	0.124711	0.198622	0.272308	0.380536	FALSE	348.346
agat-gene-684	paeni_NIB01_000747	799120	799683	+		protein_coding					GNAT family N-acetyltransferase		Acetyltransferases, including N-acetylases of ribosomal proteins	rimJ	-	2.3.1.128	ko:K03790	-	-	-	-	ko00000,ko01000,ko03009	-	-	-	Acetyltransf_3	operon0429	operon0153							-0.033333	-0.122234	-0.128431	0.853306	0.426865	0.390471	FALSE	0.450696	0.36665	0.313561	0.00588135	0.0392608	0.0565572	FALSE	26.4764
agat-gene-683	paeni_NIB01_000746	798585	799085	+	tadA	protein_coding		tRNA-specific adenosine deaminase activity|0008251||IEA	tRNA wobble adenosine to inosine editing|0002100||IEA	GO:0002100, GO:0008251	tRNA adenosine(34) deaminase TadA		Catalyzes the deamination of adenosine to inosine at the wobble position 34 of tRNA(Arg2)	tadA	GO:0002097,GO:0002100,GO:0006139,GO:0006382,GO:0006396,GO:0006399,GO:0006400,GO:0006725,GO:0006807,GO:0008033,GO:0008150,GO:0008152,GO:0009451,GO:0009987,GO:0010467,GO:0016070,GO:0016553,GO:0034470,GO:0034641,GO:0034660,GO:0043170,GO:0043412,GO:0044237,GO:0044238,GO:0046483,GO:0071704,GO:0090304,GO:1901360	3.5.4.1,3.5.4.33	ko:K01485,ko:K11991	ko00240,ko00330,ko01100,map00240,map00330,map01100	-	R00974,R01411,R02922,R10223	RC00074,RC00477,RC00514,RC00809	ko00000,ko00001,ko01000,ko03016	-	-	-	MafB19-deam	operon0429	operon0153							-0.820146	-0.761804	-0.769696	0.0055979	0.00360032	6.01482e-05	FALSE	0.838303	0.748411	0.667345	0.000141165	0.00262567	0.000566624	FALSE	22.2242
agat-gene-685	paeni_NIB01_000748	799809	800498	+		protein_coding					helix-turn-helix domain-containing protein		Helix-turn-helix domain	-	-	-	ko:K07483	-	-	-	-	ko00000	-	-	-	HTH_28,HTH_Tnp_1	operon0430	operon0154							#N/A	#N/A	#N/A	#N/A	#N/A	#N/A	#N/A	NA	NA	NA	NA	NA	NA	#VALUE!	NA
agat-gene-687	paeni_NIB01_000750	801513	802607	-		protein_coding					hypothetical protein		-	M1-243	-	-	-	-	-	-	-	-	-	-	-	-	operon0431								-1.81519	-1.63218	-1.59269	9.79152e-06	0.000106955	4.72022e-11	TRUE	0.136116	0.0800059	0.0490406	0.281662	0.64618	0.791674	FALSE	1011.63
agat-gene-686	paeni_NIB01_000749	800519	801373	+		protein_coding		transposase activity|0004803||IEA		GO:0004803	IS3 family transposase		HTH-like domain	-	-	-	ko:K07497	-	-	-	-	ko00000	-	-	-	HTH_21,rve,rve_2	operon0431	operon0154							-0.560125	-0.42812	NA	0.288534	0.542878	NA	#VALUE!	NA	NA	NA	NA	NA	NA	#VALUE!	0.80447
agat-gene-688	paeni_NIB01_000751	802875	803027	-		protein_coding			sporulation resulting in formation of a cellular spore|0030435||IEA	GO:0030435	small acid-soluble spore protein P		Spore protein	-	-	-	ko:K06433	-	-	-	-	ko00000	-	-	-	SspP	operon0431	operon0155							-3.03002	-2.39214	NA	0.000750887	0.00165058	NA	#VALUE!	NA	NA	NA	NA	NA	NA	#VALUE!	4.81314
agat-gene-689	paeni_NIB01_000752	803052	803228	-		protein_coding					hypothetical protein		-	-	-	-	-	-	-	-	-	-	-	-	-	-	operon0432	operon0155							-2.8965	-3.20037	NA	0.000910109	7.81017e-05	NA	#VALUE!	NA	NA	NA	NA	NA	NA	#VALUE!	3.08927
agat-gene-690	paeni_NIB01_000753	803254	803595	-		protein_coding					hypothetical protein		-	M1-240	-	-	-	-	-	-	-	-	-	-	-	-	operon0433	operon0155							-3.16421	-3.12289	NA	1.95442e-05	3.89848e-06	NA	#VALUE!	NA	NA	NA	NA	NA	NA	#VALUE!	16.6367
gene-paeni_NIB01_000754	paeni_NIB01_000754	803788	803876	-		tRNA																					operon0434								#N/A	#N/A	#N/A	#N/A	#N/A	#N/A	#N/A	NA	NA	NA	NA	NA	NA	#VALUE!	NA
agat-gene-691	paeni_NIB01_000755	804157	805440	-	serS	protein_coding	cytoplasm|0005737||IEA	serine-tRNA ligase activity|0004828||IEA	seryl-tRNA aminoacylation|0006434||IEA	GO:0006434, GO:0004828, GO:0005737	serine--tRNA ligase		Catalyzes the attachment of serine to tRNA(Ser). Is also able to aminoacylate tRNA(Sec) with serine, to form the misacylated tRNA L-seryl-tRNA(Sec), which will be further converted into selenocysteinyl-tRNA(Sec)	serS	GO:0000287,GO:0003674,GO:0003824,GO:0004812,GO:0004828,GO:0005488,GO:0005515,GO:0005575,GO:0005622,GO:0005623,GO:0005737,GO:0005829,GO:0006082,GO:0006139,GO:0006399,GO:0006412,GO:0006418,GO:0006434,GO:0006518,GO:0006520,GO:0006725,GO:0006807,GO:0008150,GO:0008152,GO:0008652,GO:0009058,GO:0009059,GO:0009069,GO:0009070,GO:0009987,GO:0010467,GO:0016053,GO:0016070,GO:0016259,GO:0016260,GO:0016874,GO:…	6.1.1.11	ko:K01875	ko00970,map00970	M00359,M00360	R03662,R08218	RC00055,RC00523	ko00000,ko00001,ko00002,ko01000,ko01007,ko03016	-	-	iAF987.Gmet_3528,iSDY_1059.SDY_2368	Seryl_tRNA_N,tRNA-synt_2b	operon0435								-2.16304	-2.17322	-2.17465	1.41663e-07	2.64674e-07	9.45174e-58	TRUE	0.0506728	0.153417	0.112467	0.7112	0.421235	0.546355	FALSE	495.452
agat-gene-692	paeni_NIB01_000756	805709	806299	-	pdxT	protein_coding		carbon-nitrogen ligase activity, with glutamine as amido-N-donor|0016884||IEA	pyridoxal phosphate biosynthetic process|0042823||IEA	GO:0042823, GO:0016884	pyridoxal 5'-phosphate synthase glutaminase subunit PdxT		Catalyzes the hydrolysis of glutamine to glutamate and ammonia as part of the biosynthesis of pyridoxal 5'-phosphate. The resulting ammonia molecule is channeled to the active site of PdxS	pdxT	GO:0003674,GO:0003824,GO:0005488,GO:0005515,GO:0005575,GO:0005622,GO:0005623,GO:0005737,GO:0005829,GO:0006081,GO:0006725,GO:0006732,GO:0006766,GO:0006767,GO:0006793,GO:0006796,GO:0006807,GO:0006950,GO:0006974,GO:0007154,GO:0008150,GO:0008152,GO:0008614,GO:0009058,GO:0009108,GO:0009110,GO:0009432,GO:0009605,GO:0009987,GO:0009991,GO:0016829,GO:0016840,GO:0016843,GO:0017144,GO:0018130,GO:0019438,GO:…	4.3.3.6	ko:K08681	ko00750,map00750	-	R07456	RC00010,RC01783,RC03043	ko00000,ko00001,ko01000	-	-	iHN637.CLJU_RS19495	SNO	operon0436								-2.148	-2.20235	-2.20543	2.16897e-07	1.8769e-07	5.02466e-70	TRUE	0.464985	0.581462	0.50029	0.00566618	0.014499	0.00944055	FALSE	318.086
agat-gene-693	paeni_NIB01_000757	806730	808103	-		protein_coding					D-alanyl-D-alanine carboxypeptidase		Belongs to the peptidase S11 family	dacA	GO:0003674,GO:0003824,GO:0004175,GO:0004180,GO:0004185,GO:0005575,GO:0005618,GO:0005623,GO:0006508,GO:0006807,GO:0008150,GO:0008152,GO:0008233,GO:0008236,GO:0008238,GO:0009002,GO:0016787,GO:0017171,GO:0019538,GO:0030312,GO:0043170,GO:0044238,GO:0044464,GO:0070008,GO:0070011,GO:0071704,GO:0071944,GO:0140096,GO:1901564	3.4.16.4	ko:K01286,ko:K07258	ko00550,ko01100,map00550,map01100	-	-	-	ko00000,ko00001,ko01000,ko01002,ko01011	-	-	-	PBP5_C,Peptidase_S11	operon0437								-2.32885	-2.25901	-2.24045	8.69321e-07	5.43721e-06	1.76213e-25	TRUE	0.258014	0.33573	0.284577	0.0377791	0.0509377	0.0666022	FALSE	294.359
agat-gene-694	paeni_NIB01_000758	808550	810007	-	guaB	protein_coding		IMP dehydrogenase activity|0003938||IEA	purine ribonucleotide biosynthetic process|0009152||IEA	GO:0009152, GO:0003938	IMP dehydrogenase		Catalyzes the conversion of inosine 5'-phosphate (IMP) to xanthosine 5'-phosphate (XMP), the first committed and rate- limiting step in the de novo synthesis of guanine nucleotides, and therefore plays an important role in the regulation of cell growth	guaB	GO:0003674,GO:0003824,GO:0003938,GO:0005488,GO:0005515,GO:0005575,GO:0005622,GO:0005623,GO:0005737,GO:0005829,GO:0006139,GO:0006163,GO:0006164,GO:0006183,GO:0006725,GO:0006753,GO:0006793,GO:0006796,GO:0006807,GO:0008150,GO:0008152,GO:0009058,GO:0009116,GO:0009117,GO:0009119,GO:0009141,GO:0009142,GO:0009144,GO:0009145,GO:0009150,GO:0009152,GO:0009163,GO:0009165,GO:0009199,GO:0009201,GO:0009205,GO:…	1.1.1.205	ko:K00088	ko00230,ko00983,ko01100,ko01110,map00230,map00983,map01100,map01110	M00050	R01130,R08240	RC00143,RC02207	ko00000,ko00001,ko00002,ko01000,ko04147	-	-	iAPECO1_1312.APECO1_4018,iECABU_c1320.ECABU_c28100,iECP_1309.ECP_2510,iECSF_1327.ECSF_2349,iUTI89_1310.UTI89_C2826,ic_1306.c3027	CBS,IMPDH,NMO	operon0437								-1.6689	-1.76747	-1.72581	3.19078e-05	2.43339e-05	1.50471e-15	TRUE	1.13386	1.15933	1.08067	2.10513e-06	0.000213446	1.63595e-08	TRUE	1809.75
gene-paeni_NIB01_000759	paeni_NIB01_000759	810364	810480	-	rrf	rRNA																					operon0437	operon0156							#N/A	#N/A	#N/A	#N/A	#N/A	#N/A	#N/A	NA	NA	NA	NA	NA	NA	#VALUE!	NA
gene-paeni_NIB01_000760	paeni_NIB01_000760	810560	813485	-		rRNA																					operon0438	operon0156							#N/A	#N/A	#N/A	#N/A	#N/A	#N/A	#N/A	NA	NA	NA	NA	NA	NA	#VALUE!	NA
gene-paeni_NIB01_000761	paeni_NIB01_000761	813827	815379	-		rRNA																					operon0439								#N/A	#N/A	#N/A	#N/A	#N/A	#N/A	#N/A	NA	NA	NA	NA	NA	NA	#VALUE!	NA
agat-gene-695	paeni_NIB01_000762	815893	816441	-		protein_coding					hypothetical protein		Membrane	ymcC	-	-	-	-	-	-	-	-	-	-	-	-	operon0440								-0.842099	-0.848863	NA	0.15772	0.108083	NA	#VALUE!	NA	NA	NA	NA	NA	NA	#VALUE!	4.5313
agat-gene-696	paeni_NIB01_000763	816528	817130	+		protein_coding					TetR family transcriptional regulator		BetI-type transcriptional repressor, C-terminal	-	-	-	-	-	-	-	-	-	-	-	-	TetR_C_6,TetR_N,WHG	operon0440								-1.22623	-1.2664	-1.23429	0.00103993	0.000871094	5.17669e-08	TRUE	0.639779	0.609724	0.542489	0.0010612	0.00522129	0.00156425	FALSE	36.4885
agat-gene-697	paeni_NIB01_000764	817284	818621	-		protein_coding					TrkH family potassium uptake protein		Trk-type K transport systems, membrane components	ktrB	-	-	ko:K03498	-	-	-	-	ko00000,ko02000	2.A.38.1,2.A.38.4	-	-	TrkH	operon0440								-2.78601	-2.8602	-2.86139	8.68653e-07	1.55939e-07	3.89168e-61	TRUE	-0.0938809	0.184653	0.118564	0.645125	0.539671	0.637934	FALSE	160.229
agat-gene-698	paeni_NIB01_000765	818812	820329	-	lysS	protein_coding	cytoplasm|0005737||IEA	lysine-tRNA ligase activity|0004824||IEA	lysyl-tRNA aminoacylation|0006430||IEA	GO:0006430, GO:0004824, GO:0005737	lysine--tRNA ligase		Belongs to the class-II aminoacyl-tRNA synthetase family	lysS	GO:0005575,GO:0005622,GO:0005623,GO:0005737,GO:0044424,GO:0044464	6.1.1.6	ko:K04567	ko00970,map00970	M00359,M00360	R03658	RC00055,RC00523	ko00000,ko00001,ko00002,ko01000,ko01007,ko03016	-	-	-	tRNA-synt_2,tRNA_anti-codon,tRNA_bind	operon0441								-2.38462	-2.41939	-2.40782	2.78439e-08	8.88101e-08	2.77622e-90	TRUE	0.552413	0.465845	0.415805	0.000174578	0.00690505	0.00279585	FALSE	1660.06
agat-gene-702	paeni_NIB01_000769	822484	823032	-	folK	protein_coding		2-amino-4-hydroxy-6-hydroxymethyldihydropteridine diphosphokinase activity|0003848||IEA	folic acid-containing compound biosynthetic process|0009396||IEA	GO:0009396, GO:0003848	2-amino-4-hydroxy-6-hydroxymethyldihydropteridine diphosphokinase		2-amino-4-hydroxy-6-hydroxymethyldihydropteridine pyrophosphokinase	folK	-	1.13.11.81,2.5.1.15,2.7.6.3,3.5.4.16,4.1.2.25,5.1.99.8	ko:K00796,ko:K00950,ko:K01495,ko:K01633,ko:K13940	ko00790,ko01100,map00790,map01100	M00126,M00840,M00841,M00842,M00843	R00428,R03066,R03067,R03503,R03504,R04639,R05046,R05048,R11037,R11073	RC00002,RC00017,RC00121,RC00263,RC00294,RC00323,RC00721,RC00842,RC00943,RC00945,RC01188,RC01479,RC03333,RC03334	ko00000,ko00001,ko00002,ko01000	-	-	-	FolB,HPPK	operon0442	operon0157							-1.92192	-1.99237	-1.99031	4.41164e-06	1.07576e-06	3.27582e-37	TRUE	1.05191	1.12141	1.06169	3.55922e-06	9.89154e-05	2.26815e-10	TRUE	101.555
agat-gene-705	paeni_NIB01_000772	824367	825251	-		protein_coding		catalytic activity|0003824||IEA		GO:0003824	aminotransferase class IV		4-amino-4-deoxychorismate lyase	pabC	-	2.6.1.42,4.1.3.38	ko:K00826,ko:K02619	ko00270,ko00280,ko00290,ko00770,ko00790,ko01100,ko01110,ko01130,ko01210,ko01230,map00270,map00280,map00290,map00770,map00790,map01100,map01110,map01130,map01210,map01230	M00019,M00036,M00119,M00570	R01090,R01214,R02199,R05553,R10991	RC00006,RC00036,RC01843,RC02148	ko00000,ko00001,ko00002,ko01000,ko01007	-	-	-	Aminotran_4	operon0442	operon0157							-2.50417	-2.54371	-2.53123	1.60351e-05	1.08163e-06	8.09093e-33	TRUE	0.204805	0.188461	0.141599	0.182496	0.324585	0.457642	FALSE	117.535
agat-gene-703	paeni_NIB01_000770	823042	823404	-	folB	protein_coding		dihydroneopterin aldolase activity|0004150||IEA	folic acid-containing compound metabolic process|0006760||IEA	GO:0006760, GO:0004150	dihydroneopterin aldolase		Catalyzes the conversion of 7,8-dihydroneopterin to 6- hydroxymethyl-7,8-dihydropterin	folB	-	1.13.11.81,2.5.1.15,2.7.6.3,4.1.2.25,5.1.99.8	ko:K00796,ko:K00950,ko:K01633,ko:K13940	ko00790,ko01100,map00790,map01100	M00126,M00840,M00841	R03066,R03067,R03503,R03504,R11037,R11073	RC00002,RC00017,RC00121,RC00721,RC00842,RC00943,RC01479,RC03333,RC03334	ko00000,ko00001,ko00002,ko01000	-	-	-	FolB,HPPK	operon0442	operon0157							-2.25244	-2.44464	-2.42496	6.65816e-05	2.87704e-06	1.36537e-24	TRUE	0.0238125	0.337084	NA	0.958532	0.47812	NA	#VALUE!	47.45
agat-gene-704	paeni_NIB01_000771	823507	824370	-	folP	protein_coding		dihydropteroate synthase activity|0004156||IEA	folic acid-containing compound biosynthetic process|0009396||IEA	GO:0009396, GO:0004156	dihydropteroate synthase		Catalyzes the condensation of para-aminobenzoate (pABA) with 6-hydroxymethyl-7,8-dihydropterin diphosphate (DHPt-PP) to form 7,8-dihydropteroate (H2Pte), the immediate precursor of folate derivatives	folP	GO:0003674,GO:0003824,GO:0004156,GO:0005575,GO:0005622,GO:0005623,GO:0005737,GO:0005829,GO:0006082,GO:0006575,GO:0006725,GO:0006732,GO:0006760,GO:0006807,GO:0008150,GO:0008152,GO:0009058,GO:0009108,GO:0009396,GO:0009987,GO:0016053,GO:0016740,GO:0016765,GO:0018130,GO:0019438,GO:0019752,GO:0034641,GO:0042398,GO:0042558,GO:0042559,GO:0043436,GO:0043603,GO:0043604,GO:0044237,GO:0044249,GO:0044271,GO:…	2.5.1.15,2.7.6.3	ko:K00796,ko:K13941	ko00790,ko01100,map00790,map01100	M00126,M00840,M00841	R03066,R03067,R03503	RC00002,RC00017,RC00121,RC00842	ko00000,ko00001,ko00002,ko01000	-	-	iHN637.CLJU_RS03115	Pterin_bind	operon0442	operon0157							-2.04	-2.15703	-2.14594	2.23562e-05	1.84419e-06	3.68969e-30	TRUE	0.0990453	0.040162	0.010809	0.555907	0.856642	0.963444	FALSE	160.661
agat-gene-701	paeni_NIB01_000768	822329	822532	-		protein_coding					helix-turn-helix transcriptional regulator		transcriptional	yazB	-	-	-	-	-	-	-	-	-	-	-	HTH_3,HTH_31	operon0442	operon0157							-1.68832	-1.71031	-1.69775	5.97809e-05	1.60288e-05	4.42597e-17	TRUE	0.971261	0.989664	0.782987	0.00445385	0.0127261	0.0147578	FALSE	33.2979
agat-gene-699	paeni_NIB01_000766	820451	820927	-	greA	protein_coding		DNA binding|0003677||IEA, RNA polymerase binding|0070063||IEA	regulation of DNA-templated transcription, elongation|0032784||IEA	GO:0032784, GO:0003677, GO:0070063	transcription elongation factor GreA		Necessary for efficient RNA polymerase transcription elongation past template-encoded arresting sites. The arresting sites in DNA have the property of trapping a certain fraction of elongating RNA polymerases that pass through, resulting in locked ternary complexes. Cleavage of the nascent transcript by cleavage factors such as GreA or GreB allows the resumption of elongation from the new 3'termi…	greA	-	-	ko:K03624,ko:K06140	-	-	-	-	ko00000,ko03000,ko03021	-	-	-	GreA_GreB,GreA_GreB_N	operon0442								-1.82497	-1.81715	-1.81263	2.38834e-07	5.19081e-07	2.9397e-45	TRUE	0.615351	0.533091	0.485768	4.11613e-05	0.00209049	0.000139981	FALSE	845.016
agat-gene-700	paeni_NIB01_000767	821172	822191	-	dusB	protein_coding		catalytic activity|0003824||IEA, oxidoreductase activity|0016491||IEA, tRNA dihydrouridine synthase activity|0017150||IEA, flavin adenine dinucleotide binding|0050660||IEA	tRNA processing|0008033||IEA	GO:0008033, GO:0003824, GO:0016491, GO:0017150, GO:0050660	tRNA dihydrouridine synthase DusB		Catalyzes the synthesis of 5,6-dihydrouridine (D), a modified base found in the D-loop of most tRNAs, via the reduction of the C5-C6 double bond in target uridines	dus	-	-	ko:K05540	-	-	-	-	ko00000,ko01000,ko03016	-	-	-	Dus	operon0442								-1.7299	-1.72853	-1.7223	1.56283e-06	2.50476e-06	5.25424e-29	TRUE	0.898571	0.877822	0.834903	7.839e-07	6.41509e-05	1.48599e-13	FALSE	348.896
agat-gene-706	paeni_NIB01_000773	825254	825829	-	pabA	protein_coding					aminodeoxychorismate/anthranilate synthase component II		with TrpE catalyzes the formation of anthranilate and glutamate from chorismate and glutamine	pabA	GO:0000162,GO:0003674,GO:0003824,GO:0004049,GO:0005575,GO:0005622,GO:0005623,GO:0005737,GO:0005950,GO:0006082,GO:0006520,GO:0006568,GO:0006575,GO:0006576,GO:0006586,GO:0006725,GO:0006732,GO:0006760,GO:0006807,GO:0008150,GO:0008152,GO:0008483,GO:0008652,GO:0009058,GO:0009072,GO:0009073,GO:0009108,GO:0009308,GO:0009309,GO:0009396,GO:0009987,GO:0016053,GO:0016740,GO:0016769,GO:0016829,GO:0016830,GO:…	2.6.1.85,4.1.3.27	ko:K01658,ko:K01664	ko00400,ko00405,ko00790,ko01100,ko01110,ko01130,ko01230,ko02024,ko02025,map00400,map00405,map00790,map01100,map01110,map01130,map01230,map02024,map02025	M00023	R00985,R00986,R01716	RC00010,RC01418,RC02148,RC02414	ko00000,ko00001,ko00002,ko01000	-	-	iYO844.BSU00750	GATase	operon0443	operon0157							-1.26074	-1.3612	-1.34045	0.000268162	4.67081e-05	8.44092e-13	TRUE	0.311923	0.178049	0.136004	0.0266514	0.299101	0.43866	FALSE	148.438
agat-gene-707	paeni_NIB01_000774	825876	827447	-		protein_coding					anthranilate synthase component I family protein		Anthranilate synthase	pabB	GO:0000162,GO:0000287,GO:0003674,GO:0003824,GO:0004049,GO:0005488,GO:0005575,GO:0005622,GO:0005623,GO:0005737,GO:0005950,GO:0006082,GO:0006520,GO:0006568,GO:0006575,GO:0006576,GO:0006586,GO:0006725,GO:0006732,GO:0006760,GO:0006807,GO:0008150,GO:0008152,GO:0008483,GO:0008652,GO:0009058,GO:0009072,GO:0009073,GO:0009108,GO:0009308,GO:0009309,GO:0009396,GO:0009987,GO:0016053,GO:0016740,GO:0016769,GO:…	2.6.1.85	ko:K01665	ko00790,map00790	-	R01716	RC00010,RC01418	ko00000,ko00001,ko01000	-	-	-	Anth_synt_I_N,Chorismate_bind	operon0444	operon0157							-1.80739	-1.92001	-1.91265	1.06279e-05	2.47389e-06	3.72369e-29	TRUE	0.341345	0.265277	0.217648	0.0106949	0.109725	0.174737	FALSE	523.934
agat-gene-712	paeni_NIB01_000779	831604	832470	-	nadC	protein_coding		nicotinate-nucleotide diphosphorylase (carboxylating) activity|0004514||IEA	pyridine nucleotide biosynthetic process|0019363||IEA	GO:0019363, GO:0004514	carboxylating nicotinate-nucleotide diphosphorylase		Belongs to the NadC ModD family	nadC	GO:0003674,GO:0003824,GO:0004514,GO:0005575,GO:0005622,GO:0005623,GO:0005737,GO:0006082,GO:0006139,GO:0006725,GO:0006732,GO:0006733,GO:0006753,GO:0006793,GO:0006796,GO:0006807,GO:0008150,GO:0008152,GO:0009056,GO:0009058,GO:0009108,GO:0009117,GO:0009165,GO:0009435,GO:0009987,GO:0016054,GO:0016740,GO:0016757,GO:0016763,GO:0017144,GO:0018130,GO:0019359,GO:0019362,GO:0019363,GO:0019438,GO:0019637,GO:…	1.4.3.16,2.4.2.19	ko:K00278,ko:K00767	ko00250,ko00760,ko01100,map00250,map00760,map01100	M00115	R00357,R00481,R03348	RC00006,RC02566,RC02877	ko00000,ko00001,ko00002,ko01000	-	-	iAF987.Gmet_1988,iHN637.CLJU_RS12010,iLJ478.TM1645	QRPTase_C,QRPTase_N	operon0444	operon0158							-1.89586	-1.95263	-1.94627	1.30508e-05	7.96179e-07	5.40784e-38	TRUE	0.16013	0.271361	0.22843	0.204462	0.0808391	0.113156	FALSE	186.166
agat-gene-708	paeni_NIB01_000775	827589	828527	-	cysK	protein_coding		cysteine synthase activity|0004124||IEA	cysteine biosynthetic process from serine|0006535||IEA	GO:0006535, GO:0004124	cysteine synthase A		Belongs to the cysteine synthase cystathionine beta- synthase family	cysK	GO:0000096,GO:0000097,GO:0000098,GO:0003674,GO:0003824,GO:0004122,GO:0004124,GO:0005488,GO:0005515,GO:0005575,GO:0005622,GO:0005623,GO:0005737,GO:0006082,GO:0006520,GO:0006534,GO:0006535,GO:0006555,GO:0006563,GO:0006790,GO:0006807,GO:0008134,GO:0008144,GO:0008150,GO:0008152,GO:0008284,GO:0008652,GO:0009056,GO:0009058,GO:0009063,GO:0009066,GO:0009068,GO:0009069,GO:0009070,GO:0009087,GO:0009987,GO:…	2.5.1.47	ko:K01738	ko00270,ko00920,ko01100,ko01110,ko01120,ko01130,ko01200,ko01230,map00270,map00920,map01100,map01110,map01120,map01130,map01200,map01230	M00021	R00897,R03601,R04859	RC00020,RC02814,RC02821	ko00000,ko00001,ko00002,ko01000	-	-	-	PALP	operon0444								1.17054	1.14076	1.12567	4.72919e-06	1.57916e-05	2.05222e-18	TRUE	0.964602	0.944704	0.900905	2.28147e-07	4.57141e-05	1.87613e-15	FALSE	472.131
agat-gene-710	paeni_NIB01_000777	829841	830686	-	hslO	protein_coding		unfolded protein binding|0051082||IEA	protein folding|0006457||IEA	GO:0006457, GO:0051082	Hsp33 family molecular chaperone HslO		Redox regulated molecular chaperone. Protects both thermally unfolding and oxidatively damaged proteins from irreversible aggregation. Plays an important role in the bacterial defense system toward oxidative stress	hslO	GO:0003674,GO:0005488,GO:0005515,GO:0005575,GO:0005622,GO:0005623,GO:0005737,GO:0005829,GO:0006457,GO:0006950,GO:0006979,GO:0008150,GO:0008270,GO:0009266,GO:0009408,GO:0009628,GO:0009987,GO:0031647,GO:0036506,GO:0042026,GO:0042802,GO:0043167,GO:0043169,GO:0044183,GO:0044424,GO:0044444,GO:0044464,GO:0046872,GO:0046914,GO:0050896,GO:0065007,GO:0065008	-	ko:K04083	-	-	-	-	ko00000,ko03110	-	-	-	HSP33	operon0444	operon0158							-1.28576	-1.31966	-1.30567	4.27921e-05	2.7192e-05	2.28141e-14	TRUE	0.296842	0.38252	0.326657	0.0347173	0.0379275	0.0448527	FALSE	277.862
agat-gene-709	paeni_NIB01_000776	828866	829816	-		protein_coding		peptidyl-prolyl cis-trans isomerase activity|0003755||IEA		GO:0003755	peptidyl-prolyl cis-trans isomerase		peptidyl-prolyl isomerase	prsA	-	3.1.3.16,5.2.1.8	ko:K01802,ko:K03769,ko:K07533,ko:K20074	-	-	-	-	ko00000,ko01000,ko01009,ko03110	-	-	-	Rotamase,Rotamase_2,Rotamase_3,SurA_N_3	operon0444	operon0158							-1.38858	-1.45169	-1.43335	1.76712e-05	1.26095e-05	6.86535e-18	TRUE	-0.00131655	-0.0145976	-0.0385507	0.991655	0.922611	0.791356	FALSE	346.204
agat-gene-711	paeni_NIB01_000778	830827	831597	-		protein_coding		pantothenate kinase activity|0004594||IEA		GO:0004594	type III pantothenate kinase		Catalyzes the phosphorylation of pantothenate (Pan), the first step in CoA biosynthesis	coaX	GO:0005575,GO:0005623,GO:0005886,GO:0016020,GO:0044464,GO:0071944	2.7.1.33	ko:K03525	ko00770,ko01100,map00770,map01100	M00120	R02971,R03018,R04391	RC00002,RC00017	ko00000,ko00001,ko00002,ko01000	-	-	iAF987.Gmet_1986	Pan_kinase	operon0444	operon0158							-1.76469	-1.82033	-1.82219	4.68252e-07	4.27068e-07	9.93936e-61	TRUE	0.474509	0.44083	0.391043	0.000720084	0.01002	0.00546266	FALSE	408.706
agat-gene-715	paeni_NIB01_000782	835359	837404	-	ftsH	protein_coding		metalloendopeptidase activity|0004222||IEA, ATP hydrolysis activity|0016887||IEA	proteolysis|0006508||IEA, cell division|0051301||IEA	GO:0006508, GO:0051301, GO:0004222, GO:0016887	ATP-dependent zinc metalloprotease FtsH		Acts as a processive, ATP-dependent zinc metallopeptidase for both cytoplasmic and membrane proteins. Plays a role in the quality control of integral membrane proteins	ftsH	GO:0003674,GO:0003824,GO:0004176,GO:0005575,GO:0005623,GO:0006508,GO:0006807,GO:0008150,GO:0008152,GO:0008233,GO:0008237,GO:0009056,GO:0009057,GO:0016462,GO:0016787,GO:0016817,GO:0016818,GO:0016887,GO:0017111,GO:0019538,GO:0030163,GO:0030428,GO:0032502,GO:0042623,GO:0043170,GO:0043934,GO:0044238,GO:0044464,GO:0070011,GO:0071704,GO:0140096,GO:1901564,GO:1901565,GO:1901575	-	ko:K03798	-	M00742	-	-	ko00000,ko00002,ko01000,ko01002,ko03110	-	-	-	AAA,FtsH_ext,Peptidase_M41	operon0445								-1.21583	-1.23799	-1.23648	1.21139e-06	7.10054e-06	3.937e-23	TRUE	0.379551	0.510026	0.446146	0.00343877	0.0120472	0.00639685	FALSE	2653.83
agat-gene-716	paeni_NIB01_000783	837506	838045	-	hpt	protein_coding			purine ribonucleoside salvage|0006166||IEA	GO:0006166	hypoxanthine phosphoribosyltransferase		Belongs to the purine pyrimidine phosphoribosyltransferase family	hpt	GO:0005575,GO:0005622,GO:0005623,GO:0005737,GO:0044424,GO:0044464	2.4.2.8,6.3.4.19	ko:K00760,ko:K15780	ko00230,ko00983,ko01100,ko01110,map00230,map00983,map01100,map01110	-	R00190,R01132,R01229,R02142,R08237,R08238,R08245	RC00063,RC00122	ko00000,ko00001,ko01000,ko03016	-	-	-	Pribosyltran	operon0445	operon0159							-0.66431	-0.681808	-0.679214	0.000323742	0.00126424	1.56993e-05	FALSE	0.527984	0.638244	0.576694	0.0010362	0.00279704	0.000300083	FALSE	275.307
agat-gene-713	paeni_NIB01_000780	832467	834086	-	nadB	protein_coding		L-aspartate oxidase activity|0008734||IEA	pyridine nucleotide biosynthetic process|0019363||IEA	GO:0019363, GO:0008734	L-aspartate oxidase		Catalyzes the oxidation of L-aspartate to iminoaspartate	nadB	-	1.3.5.4,1.4.3.16	ko:K00244,ko:K00278	ko00020,ko00190,ko00250,ko00620,ko00650,ko00720,ko00760,ko01100,ko01110,ko01120,ko01130,ko01200,ko02020,map00020,map00190,map00250,map00620,map00650,map00720,map00760,map01100,map01110,map01120,map01130,map01200,map02020	M00009,M00011,M00115,M00150,M00173	R00357,R00481,R02164	RC00006,RC00045,RC02566	ko00000,ko00001,ko00002,ko01000	-	-	iJN678.nadB,iSbBS512_1146.nadB	FAD_binding_2,Succ_DH_flav_C	operon0445	operon0158							-1.66484	-1.68659	-1.68003	2.81248e-05	3.11172e-06	4.33027e-25	TRUE	0.311505	0.455504	0.377626	0.0514959	0.0469233	0.0541661	FALSE	316.37
agat-gene-714	paeni_NIB01_000781	834123	835061	-	nadA	protein_coding		quinolinate synthetase A activity|0008987||IEA, 4 iron, 4 sulfur cluster binding|0051539||IEA	NAD biosynthetic process|0009435||IEA	GO:0009435, GO:0008987, GO:0051539	quinolinate synthase NadA		Catalyzes the condensation of iminoaspartate with dihydroxyacetone phosphate to form quinolinate	nadA	GO:0003674,GO:0003824,GO:0005488,GO:0005575,GO:0005618,GO:0005622,GO:0005623,GO:0005737,GO:0005829,GO:0006082,GO:0006139,GO:0006520,GO:0006531,GO:0006725,GO:0006732,GO:0006733,GO:0006753,GO:0006793,GO:0006796,GO:0006807,GO:0008150,GO:0008152,GO:0008987,GO:0009058,GO:0009066,GO:0009108,GO:0009117,GO:0009165,GO:0009435,GO:0009987,GO:0016053,GO:0017144,GO:0018130,GO:0019355,GO:0019359,GO:0019362,GO:…	2.5.1.72	ko:K03517	ko00760,ko01100,map00760,map01100	M00115	R04292	RC01119	ko00000,ko00001,ko00002,ko01000	-	-	iHN637.CLJU_RS12020	NadA	operon0445	operon0158							-1.47615	-1.48811	-1.47887	3.29144e-05	6.59051e-06	4.55777e-21	TRUE	0.843169	0.899025	0.818419	3.17882e-05	0.00102563	1.96604e-05	FALSE	369.391
agat-gene-717	paeni_NIB01_000784	838099	839538	-	tilS	protein_coding		ligase activity, forming carbon-nitrogen bonds|0016879||IEA	tRNA modification|0006400||IEA	GO:0006400, GO:0016879	tRNA lysidine(34) synthetase TilS		Ligates lysine onto the cytidine present at position 34 of the AUA codon-specific tRNA(Ile) that contains the anticodon CAU, in an ATP-dependent manner. Cytidine is converted to lysidine, thus changing the amino acid specificity of the tRNA from methionine to isoleucine	tilS	-	2.4.2.8,6.3.4.19	ko:K04075,ko:K15780	ko00230,ko01100,ko01110,map00230,map01100,map01110	-	R01132,R01229,R02142,R09597	RC00063,RC00122,RC02633,RC02634	ko00000,ko00001,ko01000,ko03016	-	-	-	ATP_bind_3,TilS,TilS_C	operon0445	operon0159							-0.251362	-0.267466	-0.266161	0.0441127	0.0904192	0.0885873	FALSE	0.468019	0.55694	0.503715	0.000933514	0.00365792	0.000433383	FALSE	463.232
agat-gene-718	paeni_NIB01_000785	839583	840530	-		protein_coding					protein kinase		serine threonine protein kinase	yabT	-	2.7.11.1	ko:K08884	-	-	-	-	ko00000,ko01000,ko01001	-	-	-	Pkinase	operon0446	operon0159							-1.07421	-1.0089	-0.998641	1.03296e-05	8.41862e-05	6.0984e-13	FALSE	0.406394	0.511873	0.460904	0.00215702	0.00440774	0.000630651	FALSE	292.901
agat-gene-719	paeni_NIB01_000786	840514	841266	-		protein_coding					VWA domain-containing protein		protein containing a von Willebrand factor type A (vWA) domain	yabS	-	-	ko:K07114	-	-	-	-	ko00000,ko02000	1.A.13.2.2,1.A.13.2.3	-	-	VIT,VWA,VWA_2	operon0447	operon0159							4.39552	4.52987	4.50467	5.3683e-08	1.1427e-07	1.23389e-93	TRUE	0.471571	0.581722	0.498553	0.0216015	0.0176674	0.0136993	FALSE	2.45172
agat-gene-721	paeni_NIB01_000788	844362	844889	-		protein_coding		nucleic acid binding|0003676||IEA		GO:0003676	S1 domain-containing RNA-binding protein		RNA-binding protein S1	yabR	-	-	ko:K07570,ko:K07571	-	-	-	-	ko00000	-	-	-	S1	operon0448								-0.306372	-0.294631	-0.29889	0.0129591	0.0395389	0.015429	FALSE	0.595004	0.56379	0.523073	2.80257e-05	0.000808645	8.12688e-07	FALSE	1717.72
agat-gene-722	paeni_NIB01_000789	845088	845423	-		protein_coding					septum formation initiator family protein		Septum formation initiator	divIC	-	-	ko:K05589,ko:K13052	-	-	-	-	ko00000,ko03036	-	-	-	DivIC	operon0448	operon0160							-0.75465	-0.708653	-0.704998	0.000166117	0.000596061	7.28758e-08	FALSE	-0.232841	0.0118458	-0.0140248	0.261371	0.960482	0.954112	FALSE	159.72
agat-gene-723	paeni_NIB01_000790	845436	846005	-	yabQ	protein_coding		molecular_function|0003674||IEA	asexual sporulation|0030436||IEA	GO:0030436, GO:0003674	spore cortex biosynthesis protein YabQ		Spore cortex biosynthesis protein YabQ	yabQ	GO:0005575,GO:0005623,GO:0042601,GO:0042763,GO:0044464	-	-	-	-	-	-	-	-	-	-	Spore_YabQ	operon0448	operon0160							-0.280119	-0.247543	-0.257908	0.0256677	0.0636788	0.019694	FALSE	0.393408	0.492093	0.370436	0.100407	0.10956	0.13474	FALSE	109.944
agat-gene-724	paeni_NIB01_000791	846002	846286	-	yabP	protein_coding	cellular_component|0005575||IEA	molecular_function|0003674||IEA	asexual sporulation|0030436||IEA	GO:0030436, GO:0003674, GO:0005575	sporulation protein YabP		Spore coat protein	yabP	GO:0005575,GO:0005623,GO:0042601,GO:0042763,GO:0044464	-	-	-	-	-	-	-	-	-	-	YabP	operon0448	operon0160							-0.0259148	-0.140371	NA	0.947151	0.748552	NA	#VALUE!	NA	NA	NA	NA	NA	NA	#VALUE!	1.61441
agat-gene-720	paeni_NIB01_000787	841352	843859	-	spoIIE	protein_coding	membrane|0016020||IEA	protein serine/threonine phosphatase activity|0004722||IEA	asexual sporulation|0030436||IEA	GO:0030436, GO:0004722, GO:0016020	stage II sporulation protein E		Stage II sporulation protein E	spoIIE	GO:0005575,GO:0005623,GO:0042601,GO:0042763,GO:0044464	3.1.3.16	ko:K06382	-	-	-	-	ko00000,ko01000	-	-	-	SpoIIE	operon0448	operon0159							1.12425	1.16886	1.08631	0.0161828	0.00990215	0.000260737	TRUE	NA	NA	NA	NA	NA	NA	#VALUE!	4.32608
agat-gene-725	paeni_NIB01_000792	846467	846745	-		protein_coding					RNA-binding S4 domain-containing protein		Ribosome-associated heat shock protein implicated in the recycling of the 50S subunit (S4 paralog)	yabO	GO:0008150,GO:0040007	-	-	-	-	-	-	-	-	-	-	DUF3558,S4	operon0449	operon0161							-1.49117	-1.37093	-1.33848	6.39516e-05	5.27418e-05	2.49698e-12	TRUE	-0.40114	-0.566651	-0.525345	0.0321565	0.0240629	0.0112663	FALSE	391.323
agat-gene-726	paeni_NIB01_000793	846745	847017	-		protein_coding					HU family DNA-binding protein		Histone-like DNA-binding protein which is capable of wrapping DNA to stabilize it, and thus to prevent its denaturation under extreme environmental conditions	hupA	-	-	ko:K03530	-	-	-	-	ko00000,ko03032,ko03036,ko03400	-	-	-	Bac_DNA_binding	operon0450	operon0161							-1.35981	-1.23548	-1.21614	1.62019e-05	3.33631e-05	1.22427e-13	TRUE	0.0109645	-0.0711548	-0.0898713	0.934986	0.63148	0.538213	FALSE	560.119
agat-gene-727	paeni_NIB01_000794	847316	848809	-	mazG	protein_coding					nucleoside triphosphate pyrophosphohydrolase		Protein containing tetrapyrrole methyltransferase domain and MazG-like	mazG	GO:0003674,GO:0003824,GO:0006139,GO:0006163,GO:0006195,GO:0006203,GO:0006213,GO:0006220,GO:0006244,GO:0006725,GO:0006753,GO:0006793,GO:0006796,GO:0006807,GO:0008150,GO:0008152,GO:0009056,GO:0009058,GO:0009116,GO:0009117,GO:0009119,GO:0009141,GO:0009143,GO:0009144,GO:0009146,GO:0009147,GO:0009149,GO:0009151,GO:0009155,GO:0009164,GO:0009166,GO:0009199,GO:0009200,GO:0009203,GO:0009204,GO:0009208,GO:…	3.6.1.66,3.6.1.9	ko:K02428,ko:K02499,ko:K04765	ko00230,ko00240,ko00760,ko00770,ko01100,map00230,map00240,map00760,map00770,map01100	-	R00086,R00087,R00103,R00287,R00426,R00515,R00662,R00720,R01855,R02100,R02720,R03004,R03036,R03531,R11323	RC00002	ko00000,ko00001,ko01000,ko03036	-	-	iJN678.sll1005	MazG,TP_methylase	operon0451								-1.52743	-1.51167	-1.5117	2.08584e-06	3.63334e-06	2.40532e-30	TRUE	0.414313	0.428494	0.368123	0.00341767	0.0269034	0.0271643	FALSE	372.617
agat-gene-728	paeni_NIB01_000795	849063	850817	-		protein_coding					polysaccharide biosynthesis protein		Membrane protein involved in the export of O-antigen and teichoic acid	yabM	GO:0005575,GO:0005623,GO:0005886,GO:0016020,GO:0044464,GO:0071944	-	ko:K03328,ko:K06409	-	-	-	-	ko00000,ko02000	2.A.66.2,2.A.66.2.14	-	-	Polysacc_synt,Polysacc_synt_C	operon0452								-0.790396	-0.858477	-0.84822	0.000681433	0.00052911	3.50803e-10	FALSE	-0.289557	-0.507396	-0.464854	0.117046	0.0434554	0.0291447	FALSE	80.9614
agat-gene-729	paeni_NIB01_000796	851006	851548	-	spoVT	protein_coding		DNA-binding transcription factor activity|0003700||IEA	regulation of transcription, DNA-templated|0006355||IEA, asexual sporulation|0030436||IEA	GO:0006355, GO:0030436, GO:0003700	stage V sporulation protein T		stage V sporulation protein T	spoVT	GO:0003674,GO:0005488,GO:0005515,GO:0042802	-	ko:K04769	-	-	-	-	ko00000,ko03000	-	-	-	MazE_antitoxin,SpoVT_C	operon0452								-0.216388	-0.201942	-0.202334	0.192618	0.282058	0.25612	FALSE	0.452296	0.583316	0.508818	0.00584374	0.00977416	0.00572644	FALSE	47.1436
agat-gene-730	paeni_NIB01_000797	851868	853016	-		protein_coding					peptidylprolyl isomerase		peptidyl-prolyl isomerase	prsA1	-	5.2.1.8	ko:K03769,ko:K03771,ko:K07533	-	-	-	-	ko00000,ko01000,ko03110	-	-	-	Rotamase,Rotamase_3,SurA_N_3	operon0453	operon0162							0.492315	0.457268	0.439033	0.0013893	0.00929937	0.00262262	FALSE	0.668033	0.681349	0.630863	2.14645e-05	0.000591105	1.13098e-06	FALSE	633.649
[truncated: 5,454 more rows]
[truncated: 31 more columns]
