# Supplementary material
Source: Research Square preprint supplement (doi:10.21203/rs.3.rs-9967549/v1)
Supplement: Supplementary file 2 [file d5675ffcc2d0ee6288fdc638.docx]

**Supporting Methods**

***Paenibacillus* spp., a novel potato endophyte, adapts its physiology *in planta* to establish mutualistic symbiosis with potato**

**Karmen Pogačar, Tim Godec, Juliane Albrecht, Polonca Štefanič, Maja Križnik, Barbara Kraigher, Tjaša Lukan, Valentina Levak, Katja Stare, Marko Petek, Sarah Lebeis, Peter Dolničar, Ines Mandić Mulec, Kristina Gruden**

**Electroporation**

Electrocompetent *Paenibacillus* sp. strain ST1 cells were prepared by modifying the method described by Bach et al. (Bach et al., 2016). Three single colonies were inoculated into 20 mL BHI broth (Oxoid) and incubated overnight at 28 °C with shaking at 125 rpm. The overnight culture was diluted 1:100 into 150 mL fresh BHI and grown at 28 °C with shaking at 90 rpm until reaching an OD₆₀₀ of 0.3 (approximately 5 hours). Cells were immediately chilled on ice for 10 min to arrest growth. Cells were harvested and washed three times in ice-cold SM buffer (10 % sucrose, 1 mM MgCl₂) by centrifugation at 2700 ×g for 10 min at 4 °C. The first wash used the full culture volume (1×V), followed by two washes with ½×V and ¼×V, respectively. After washing, cells were concentrated to an OD₆₀₀ equivalent of 50 and resuspended in 900 μL of ice-cold SM buffer. For transformation, 50 μL of competent cells were mixed with 100 ng of plasmid DNA (isolated using a Qiagen plasmid purification kit), transferred into a pre-chilled 1 mm electroporation cuvette, and incubated on ice for 10 min. Electroporation was carried out using a single pulse at 18 kV/cm, 150 Ω, and 36 μF. Immediately after pulsing, 950 μL of pre-warmed Recovery KB medium (Difco Proteose Peptone No. 3 (20 g/L), K₂HPO₄ (4.15 g/L), MgSO₄·7H₂O (1.5 g/L), glycerol (1.5% v/v), pH adjusted to 7.0.) was added, and cells were incubated at 46 °C for 10 min without shaking. Following recovery, transformants were plated on KB agar with chloramphenicol (5 µg/mL) and incubated at 28 °C until colonies appeared.

**Plant growth promotion testing**

Siderophore production

To assess siderophore production, bacterial isolates were spot-inoculated onto Chrome Azurol S agar (CAS–agar) plates, prepared according to the universal chemical assay by Schwyn and Neilands (1987). Briefly, a single colony from an overnight LB plate was transferred to the center of a CAS-agar plate and incubated at 28 °C for 5–7 days. The CAS–agar medium was prepared by adding the CAS dye solution to LB agar (final concentration: 10 % v/v CAS reagent in 90 % LB agar) after autoclaving and cooling to 55 °C. Siderophore production was visually detected by the formation of an orange halo around colonies, indicating ferric iron chelation and dye displacement. Plates were monitored daily for up to one week, and positive isolates were recorded by the presence and size of the orange zone.

Indole acetic acid production

To evaluate the ability of bacterial isolates to produce indole-3-acetic acid (IAA), a single colony from an overnight-grown culture was transferred into 0.5 mL of sterile physiological saline (0.9 % NaCl) and thoroughly mixed to form an uniform suspension. From this, 20 µL was pipetted into each well of a sterile 96-well microtiter plate containing 130 µL of liquid LB medium. The plate was incubated overnight at 37 °C in the dark with shaking at 400 rpm. Following incubation, 200 µL of the culture from each well was transferred into a test tube containing 1.3 mL of freshly prepared Landy medium. This medium was prepared with the following composition (per litre of distilled water): 10.0 g D-glucose, 1.0 g yeast extract, 5.0 g sodium glutamate, 2.0 mg phenylalanine, 0.61 g tryptophan, 0.5 g potassium chloride (KCl), 1.0 g potassium dihydrogen phosphate (KH₂PO₄), 0.5 g magnesium sulfate heptahydrate (MgSO₄·7H₂O), 5.0 mg manganese sulfate tetrahydrate (MnSO₄·4H₂O), 0.16 mg copper sulfate heptahydrate (CuSO₄·7H₂O), and 0.15 mg iron(II) sulfate heptahydrate (FeSO₄·7H₂O). The tubes were incubated at 28 °C in the dark with shaking at 200 rpm for 48 hours. After incubation, the cultures were transferred to microcentrifuge tubes and centrifuged at 10,000 rpm for 10 minutes. From the resulting supernatant, 100 µL was pipetted into a fresh microtiter plate well, followed by the addition of 200 µL of Salkowski reagent. The plates were then incubated in the dark for 30 minutes to allow color development. IAA production was assessed by comparing the intensity of the resulting pink coloration with that of known positive and negative controls. (Glickmann and Dessaux, 1995; Shao et al., 2015).

Phosphate solubilization

Phosphate solubilization was assessed on solid medium using the NBRIP agar (Nautiyal 1999) supplemented with bromocresol purple as a pH indicator. The medium was prepared with the following composition (per litre of distilled water): 10.0 g glucose, 5.0 g calcium phosphate tribasic (Ca₃(PO₄)₂), 5.0 g magnesium chloride hexahydrate (MgCl₂·6H₂O), 0.25 g magnesium sulfate heptahydrate (MgSO₄·7H₂O), 0.1 g ammonium sulfate ((NH₄)₂SO₄), 0.2 g potassium chloride (KCl), 0.015 g bromocresol purple, and 15.0 g agar. Ten microliters (10 µL) of overnight bacterial culture was spot-inoculated on each plate, with three strains per plate. The plates were incubated for 3 days at 28 °C. Phosphate solubilization was indicated by the formation of clear halos or zones of clearing around the bacterial colonies, resulting from the solubilization of insoluble calcium phosphate and associated pH changes detected by the indicator dye.

Nitrogen Fixation Assay

To evaluate nitrogen fixation capability, 10 µL of an overnight bacterial culture was spot-inoculated onto Ashby’s Mannitol Agar supplemented with bromothymol blue. The nitrogen-free Ashby’s Mannitol Agar was prepared with the following composition (per litre of distilled water): Mannitol-based Ashby medium – 40.7 g/ and 15.0 g agar. Additionally, 2 mL of a 1.6 % (w/v) bromothymol blue solution in ethanol was added as a pH indicator (per liter). Plates were incubated at 28 °C for 7–8 days, and color change from green-blue to yellow upon acidification caused by ammonium production during nitrogen fixation of the medium was monitored as an indicator of nitrogenase activity.

A single colony from the LB medium was spread on Ashby's solid medium (nitrogen-free) with added BPB (color indicator) and incubated for up to 7 days at 28 °C. Growth on the medium indicated the strain's ability to use atmospheric nitrogen as its sole nitrogen source. Yellow coloration of colonies and medium indicated lower pH (due to organic acids), while blue color indicated higher pH (due to nitrogen presence), but medium color did not impact the test result. Growth indicated nitrogen fixation ability, representing a positive result.

Pectinase Activity Assay

To assess extracellular pectinase activity 5 µL of an overnight bacterial culture was spot-inoculated onto pectin agar plates prepared according to standard formulations commonly used for screening microbial pectinase activity. The pectin medium was prepared with the following composition (per liter of distilled water): 5.0 g pectin, 0.5 g dipotassium phosphate (K₂HPO₄), 0.1 g magnesium sulfate heptahydrate (MgSO₄·7H₂O), 0.2 g sodium chloride (NaCl), 0.2 g calcium chloride dihydrate (CaCl₂·2H₂O), 0.01 g ferric chloride hexahydrate (FeCl₃·6H₂O), 1.0 g yeast extract, and 20.0 g agar. Following inoculation, the plates were incubated at 28 °C for 72 hours, after which pectinase activity was assessed by the appearance of clear hydrolysis zones around the colonies after flooding the plates with iodine (2.0 g KI and 1.0 g iodine in 300 ml distilled water).

Extracellular cellulase activity

To evaluate extracellular cellulase activity, 5 µL of overnight cultures were spotted on CMC agar plates (Kasana et al., 2008) containing 0.2 % (w/v) carboxymethyl cellulose (CMC-NaCl, degree of substitution 0.7), 0.2% (w/v) sodium nitrate (NaNO₃), 0.1 % (w/v) dipotassium phosphate (K₂HPO₄), 0.05 % (w/v) magnesium sulfate heptahydrate (MgSO₄·7H₂O), 0.05 % (w/v) potassium chloride (KCl), 0.02 % (w/v) peptone (Peptomix), and 1.5 % (w/v) agar (the original recipe uses 1.7 %). The plates were incubated at 28 ºC for 48 h and were flooded with iodine (2.0 g KI and 1.0 g iodine in 300 mL distilled water) for 3 to 5 minutes, giving a distinct zone around the cellulase-producing microbial colonies.

Chitinase Activity Assay

Chitinase activity was assessed using a fluorogenic substrate assay adapted from the method of O’Brien and Colwell (1987). Bacterial cultures were grown in tryptic soy broth (TSB) for 48 h at 28 °C with shaking at 200 rpm. Cells were then harvested by centrifugation at 13,000 ×g for 10 minutes, and the supernatant was collected for enzymatic analysis.

For the assay, 250 µL of culture supernatant was mixed with 10 µL of 4-methylumbelliferyl-N-acetyl-β-D-glucosaminide (MUF-GlcNAc) at a final concentration of 0.568 mg/mL. Stock MUF-GlcNAc solution was prepared at a concentration of 9.47 mg/mL in dimethylformamide (DMF). For use in the assay, it was diluted to 0.568 mg/mL in 0.1 M phosphate buffer (pH 7.4). 0.1 M phosphate buffer (pH 7.4) was prepared by mixing 80.2 mL of 1 M dipotassium phosphate (K₂HPO₄) and 19.8 mL of 1 M monopotassium phosphate (KH₂PO₄). The pH was adjusted to 7.4 with HCl or NaOH. Stock 1 M phosphate solutions were prepared by dissolving 17.42 g of K₂HPO₄ and 13.61 g of KH₂PO₄, respectively, in 100 mL of distilled water. The reaction mixture was incubated at 37 °C for 10 minutes without shaking. After incubation, the reaction was stopped by adding approximately 5 µL of saturated sodium bicarbonate (NaHCO₃). Saturated NaHCO₃ solution was prepared by dissolving 9.5 g of sodium bicarbonate in 100 mL of distilled water with gentle heating and stirring. The solution was filtered through a 0.2 µm membrane filter and stored at 4 °C. A 200 µL aliquot of the final mixture was transferred to a black 96-well microtiter plate, and fluorescence was measured using a Safire II microplate reader at 360 nm excitation and 450 nm emission.

Protease Activity Assay

To evaluate extracellular protease activity, 5 µL of an overnight bacterial culture was spot-inoculated onto casein–gelatin agar plates. The medium composition was based on standard formulations used for screening extracellular protease activity in bacteria and contained 0.02 M sodium hydroxide (NaOH), 10 g/L sodium caseinate, 10 g/L gelatin, and 15 g/L agar. The components were dissolved in distilled water, and the pH was adjusted to 7.0 using 2 M hydrochloric acid (HCl). The final volume was brought to 1 L with distilled water. The medium was autoclaved at 110 °C for 30 minutes, cooled to 55 °C in a water bath, and poured into sterile 70 mm plastic Petri dishes (20 mL per plate). Plates were allowed to solidify overnight at room temperature and were then stored at 4 °C until use. Plates were incubated at 28 °C for 72 hours and degradation of casein/gelatin was observed as appearance of halos around the colonies.

Xylanase Activity Assay

To assess extracellular xylanase activity, 5 µL of an overnight bacterial culture was spot-inoculated onto xylan agar plates. The growth medium contained 10 g/L birchwood xylan, 0.005 g/L sodium nitrate (NaNO₃), 1 g/L dipotassium phosphate (K₂HPO₄), 0.5 g/L magnesium sulfate heptahydrate (MgSO₄·7H₂O), 0.001 g/L ferrous sulfate heptahydrate (FeSO₄·7H₂O), 1 g/L yeast extract, and 15 g/L agar. The pH of the medium was adjusted to 8.0 ± 0.3 prior to autoclaving. Plates were incubated at 37 °C for 48 hours. Following incubation, the plates were flooded with a potassium iodide solution (0.2 g/L) to visualize zones of hydrolysis. The appearance of clear halos around the colonies indicated degradation of xylan due to extracellular xylanase activity.

Starch Hydrolysis Assay

To evaluate extracellular amylase activity, 5 µL of an overnight bacterial culture was spot-inoculated onto starch agar plates. The medium contained 5 g/L peptone, 3 g/L meat extract, 5 g/L sodium chloride (NaCl), 20 g/L soluble starch, and 20 g/L agar, dissolved in distilled water and adjusted to a final volume of 1 L. After inoculation, plates were incubated at 28 °C for 48 hours. Following incubation, plates were flooded with an aqueous potassium iodide solution (0.2 g/L). The appearance of clear zones around the bacterial colonies indicated starch hydrolysis due to extracellular amylase activity.

Biofilm formation

A 1 % inoculum from an overnight culture was transferred into LB or MSgg medium in a 12-well microtiter plate. MSgg medium contained: 5 mM potassium phosphate, 100 mM 3-(N-morpholino)propanesulfonic acid (MOPS), 2 mM MgCl₂, 700 μM CaCl₂, 50 μM MnCl₂, 50 μM FeCl₃, 1 μM ZnCl₂, 2 μM thiamine, 0.5 % (v/v) glycerol, and 0.5 % (w/v) glutamate as carbon and nitrogen sources. To support growth and biofilm development, the medium was further supplemented with 50 μg/mL of l-tryptophan, 50 μg/mL of l-phenylalanine, and 50 μg/mL of threonine. All components were dissolved in distilled water, and the final pH was adjusted to 7.0 with NaOH or HCl. Plates were incubated at 28 °C without shaking. Biofilm formation was monitored visually at 24 and 48 hours post-inoculation. Wells were imaged to document biofilm morphology. Th*e B. subtilis* PS-216 was used as a positive control for robust biofilm formation.

Surfactants

To assess surfactant production, a 1% inoculum of an overnight culture was transferred into competence medium (CM) and incubated at 37 °C for 16–24 hours. The following day, 1 mL of the culture was harvested by centrifugation at 16,000 ×g for 2–3 minutes at room temperature. The supernatant was discarded, and 30 µL of the remaining cell suspension was carefully pipetted onto a piece of Parafilm. The droplet was observed to assess spreading behavior, which serves as an indicator of surfactant production and was compared to positive control B. subtilis PS-216 and negative control, distilled water.
